# Supplementary material for: Reproducible analysis of disease space via principal components using the novel R package syndRomics
Source: eLife. 2021 Jan 14;10:e61812. doi: 10.7554/eLife.61812 (PMC7857733; doi:10.7554/eLife.61812)
Supplement: Figure 3—figure supplement 1—source data 1. [file elife-61812-fig3-figsupp1-data1.csv]

	index_all.Comparison	index_all.PC	index_all.cc_index	index_all.r_correlation	index_all.rmse	index_all.s_index	index_all.s_HP	index_mean.PC	index_mean.cc_index	index_mean.r_correlation	index_mean.rmse	index_mean.s_index	index_mean.s_HP	index_sd.PC	index_sd.cc_index	index_sd.r_correlation	index_sd.rmse	index_sd.s_index	index_sd.s_HP
1	1 vs. 2	1	0.999	0.9993	0.0266	0.9714	0.0278	1	0.998942612244898	0.998988244897959	0.0261798367346939	0.973154367346939	0.0477981224489796	1	0.000443190711999786	0.000438776826387494	0.00526656986503144	0.0241848423728632	0.0280526463759508
2	1 vs. 2	2	0.9982	0.9983	0.0253	1	0.1111	2	0.997084244897959	0.997079102040816	0.0320324897959184	0.98314506122449	0.13334	2	0.00167378038871567	0.00167997748687571	0.00839505607048402	0.0172091595875419	0.019070642667847
3	1 vs. 2	3	0.9917	0.9863	0.0406	0.9565	0.3611	3	0.978327836734694	0.963547755102041	0.0622181224489796	0.938534775510204	0.40110987755102	3	0.0162470837193968	0.0272804614226038	0.0217686779856555	0.0527818480087459	0.0383368411702942
4	1 vs. 3	1	0.999	0.9991	0.0255	1	0.0556	1	0.998942612244898	0.998988244897959	0.0261798367346939	0.973154367346939	0.0477981224489796	1	0.000443190711999786	0.000438776826387494	0.00526656986503144	0.0241848423728632	0.0280526463759508
5	1 vs. 3	2	0.9983	0.9986	0.0247	0.9677	0.1389	2	0.997084244897959	0.997079102040816	0.0320324897959184	0.98314506122449	0.13334	2	0.00167378038871567	0.00167997748687571	0.00839505607048402	0.0172091595875419	0.019070642667847
6	1 vs. 3	3	0.9911	0.9844	0.0422	1	0.3889	3	0.978327836734694	0.963547755102041	0.0622181224489796	0.938534775510204	0.40110987755102	3	0.0162470837193968	0.0272804614226038	0.0217686779856555	0.0527818480087459	0.0383368411702942
7	1 vs. 4	1	0.9994	0.9994	0.0201	0.9714	0.0278	1	0.998942612244898	0.998988244897959	0.0261798367346939	0.973154367346939	0.0477981224489796	1	0.000443190711999786	0.000438776826387494	0.00526656986503144	0.0241848423728632	0.0280526463759508
8	1 vs. 4	2	0.9984	0.9985	0.026	1	0.1111	2	0.997084244897959	0.997079102040816	0.0320324897959184	0.98314506122449	0.13334	2	0.00167378038871567	0.00167997748687571	0.00839505607048402	0.0172091595875419	0.019070642667847
9	1 vs. 4	3	0.9917	0.988	0.0417	0.9565	0.3611	3	0.978327836734694	0.963547755102041	0.0622181224489796	0.938534775510204	0.40110987755102	3	0.0162470837193968	0.0272804614226038	0.0217686779856555	0.0527818480087459	0.0383368411702942
10	1 vs. 5	1	0.9987	0.9987	0.0288	1	0.0556	1	0.998942612244898	0.998988244897959	0.0261798367346939	0.973154367346939	0.0477981224489796	1	0.000443190711999786	0.000438776826387494	0.00526656986503144	0.0241848423728632	0.0280526463759508
11	1 vs. 5	2	0.9974	0.9975	0.0303	1	0.1111	2	0.997084244897959	0.997079102040816	0.0320324897959184	0.98314506122449	0.13334	2	0.00167378038871567	0.00167997748687571	0.00839505607048402	0.0172091595875419	0.019070642667847
12	1 vs. 5	3	0.9889	0.9826	0.0466	0.9524	0.4167	3	0.978327836734694	0.963547755102041	0.0622181224489796	0.938534775510204	0.40110987755102	3	0.0162470837193968	0.0272804614226038	0.0217686779856555	0.0527818480087459	0.0383368411702942
13	1 vs. 6	1	0.9991	0.9991	0.0256	1	0.0556	1	0.998942612244898	0.998988244897959	0.0261798367346939	0.973154367346939	0.0477981224489796	1	0.000443190711999786	0.000438776826387494	0.00526656986503144	0.0241848423728632	0.0280526463759508
14	1 vs. 6	2	0.9967	0.9967	0.0361	1	0.1111	2	0.997084244897959	0.997079102040816	0.0320324897959184	0.98314506122449	0.13334	2	0.00167378038871567	0.00167997748687571	0.00839505607048402	0.0172091595875419	0.019070642667847
15	1 vs. 6	3	0.9844	0.9749	0.0554	0.9565	0.3611	3	0.978327836734694	0.963547755102041	0.0622181224489796	0.938534775510204	0.40110987755102	3	0.0162470837193968	0.0272804614226038	0.0217686779856555	0.0527818480087459	0.0383368411702942
16	1 vs. 7	1	0.9995	0.9995	0.0182	1	0.0556	1	0.998942612244898	0.998988244897959	0.0261798367346939	0.973154367346939	0.0477981224489796	1	0.000443190711999786	0.000438776826387494	0.00526656986503144	0.0241848423728632	0.0280526463759508
17	1 vs. 7	2	0.9989	0.9992	0.0195	0.9677	0.1389	2	0.997084244897959	0.997079102040816	0.0320324897959184	0.98314506122449	0.13334	2	0.00167378038871567	0.00167997748687571	0.00839505607048402	0.0172091595875419	0.019070642667847
18	1 vs. 7	3	0.9828	0.9686	0.0601	1	0.3889	3	0.978327836734694	0.963547755102041	0.0622181224489796	0.938534775510204	0.40110987755102	3	0.0162470837193968	0.0272804614226038	0.0217686779856555	0.0527818480087459	0.0383368411702942
19	1 vs. 8	1	0.9987	0.9987	0.0295	1	0.0556	1	0.998942612244898	0.998988244897959	0.0261798367346939	0.973154367346939	0.0477981224489796	1	0.000443190711999786	0.000438776826387494	0.00526656986503144	0.0241848423728632	0.0280526463759508
20	1 vs. 8	2	0.9982	0.9983	0.0252	0.9677	0.1389	2	0.997084244897959	0.997079102040816	0.0320324897959184	0.98314506122449	0.13334	2	0.00167378038871567	0.00167997748687571	0.00839505607048402	0.0172091595875419	0.019070642667847
21	1 vs. 8	3	0.939	0.8867	0.1096	0.8182	0.3889	3	0.978327836734694	0.963547755102041	0.0622181224489796	0.938534775510204	0.40110987755102	3	0.0162470837193968	0.0272804614226038	0.0217686779856555	0.0527818480087459	0.0383368411702942
22	1 vs. 9	1	0.9987	0.9988	0.028	0.9714	0.0278	1	0.998942612244898	0.998988244897959	0.0261798367346939	0.973154367346939	0.0477981224489796	1	0.000443190711999786	0.000438776826387494	0.00526656986503144	0.0241848423728632	0.0280526463759508
23	1 vs. 9	2	0.9991	0.9992	0.0178	1	0.1111	2	0.997084244897959	0.997079102040816	0.0320324897959184	0.98314506122449	0.13334	2	0.00167378038871567	0.00167997748687571	0.00839505607048402	0.0172091595875419	0.019070642667847
24	1 vs. 9	3	0.9875	0.977	0.051	1	0.3889	3	0.978327836734694	0.963547755102041	0.0622181224489796	0.938534775510204	0.40110987755102	3	0.0162470837193968	0.0272804614226038	0.0217686779856555	0.0527818480087459	0.0383368411702942
25	1 vs. 10	1	0.9992	0.9993	0.0246	0.9697	0.0833	1	0.998942612244898	0.998988244897959	0.0261798367346939	0.973154367346939	0.0477981224489796	1	0.000443190711999786	0.000438776826387494	0.00526656986503144	0.0241848423728632	0.0280526463759508
26	1 vs. 10	2	0.9976	0.9977	0.0295	0.9677	0.1389	2	0.997084244897959	0.997079102040816	0.0320324897959184	0.98314506122449	0.13334	2	0.00167378038871567	0.00167997748687571	0.00839505607048402	0.0172091595875419	0.019070642667847
27	1 vs. 10	3	0.9767	0.957	0.0686	0.9524	0.4167	3	0.978327836734694	0.963547755102041	0.0622181224489796	0.938534775510204	0.40110987755102	3	0.0162470837193968	0.0272804614226038	0.0217686779856555	0.0527818480087459	0.0383368411702942
28	1 vs. 11	1	0.9993	0.9994	0.0234	1	0.0556	1	0.998942612244898	0.998988244897959	0.0261798367346939	0.973154367346939	0.0477981224489796	1	0.000443190711999786	0.000438776826387494	0.00526656986503144	0.0241848423728632	0.0280526463759508
29	1 vs. 11	2	0.9979	0.9979	0.0285	0.9677	0.1389	2	0.997084244897959	0.997079102040816	0.0320324897959184	0.98314506122449	0.13334	2	0.00167378038871567	0.00167997748687571	0.00839505607048402	0.0172091595875419	0.019070642667847
30	1 vs. 11	3	0.9754	0.9634	0.0691	0.9565	0.3611	3	0.978327836734694	0.963547755102041	0.0622181224489796	0.938534775510204	0.40110987755102	3	0.0162470837193968	0.0272804614226038	0.0217686779856555	0.0527818480087459	0.0383368411702942
31	1 vs. 12	1	0.9985	0.9985	0.0318	0.9714	0.0278	1	0.998942612244898	0.998988244897959	0.0261798367346939	0.973154367346939	0.0477981224489796	1	0.000443190711999786	0.000438776826387494	0.00526656986503144	0.0241848423728632	0.0280526463759508
32	1 vs. 12	2	0.9987	0.9989	0.0223	0.9677	0.1389	2	0.997084244897959	0.997079102040816	0.0320324897959184	0.98314506122449	0.13334	2	0.00167378038871567	0.00167997748687571	0.00839505607048402	0.0172091595875419	0.019070642667847
33	1 vs. 12	3	0.962	0.9298	0.0856	0.9	0.4444	3	0.978327836734694	0.963547755102041	0.0622181224489796	0.938534775510204	0.40110987755102	3	0.0162470837193968	0.0272804614226038	0.0217686779856555	0.0527818480087459	0.0383368411702942
34	1 vs. 13	1	0.9983	0.9984	0.0343	0.9412	0.0556	1	0.998942612244898	0.998988244897959	0.0261798367346939	0.973154367346939	0.0477981224489796	1	0.000443190711999786	0.000438776826387494	0.00526656986503144	0.0241848423728632	0.0280526463759508
35	1 vs. 13	2	0.998	0.998	0.0275	1	0.1111	2	0.997084244897959	0.997079102040816	0.0320324897959184	0.98314506122449	0.13334	2	0.00167378038871567	0.00167997748687571	0.00839505607048402	0.0172091595875419	0.019070642667847
36	1 vs. 13	3	0.9832	0.9715	0.0572	0.9524	0.4167	3	0.978327836734694	0.963547755102041	0.0622181224489796	0.938534775510204	0.40110987755102	3	0.0162470837193968	0.0272804614226038	0.0217686779856555	0.0527818480087459	0.0383368411702942
37	1 vs. 14	1	0.9988	0.9989	0.0281	0.9714	0.0278	1	0.998942612244898	0.998988244897959	0.0261798367346939	0.973154367346939	0.0477981224489796	1	0.000443190711999786	0.000438776826387494	0.00526656986503144	0.0241848423728632	0.0280526463759508
38	1 vs. 14	2	0.9983	0.9983	0.0249	1	0.1111	2	0.997084244897959	0.997079102040816	0.0320324897959184	0.98314506122449	0.13334	2	0.00167378038871567	0.00167997748687571	0.00839505607048402	0.0172091595875419	0.019070642667847
39	1 vs. 14	3	0.9919	0.9862	0.0401	0.9565	0.3611	3	0.978327836734694	0.963547755102041	0.0622181224489796	0.938534775510204	0.40110987755102	3	0.0162470837193968	0.0272804614226038	0.0217686779856555	0.0527818480087459	0.0383368411702942
40	1 vs. 15	1	0.9994	0.9994	0.0197	0.9412	0.0556	1	0.998942612244898	0.998988244897959	0.0261798367346939	0.973154367346939	0.0477981224489796	1	0.000443190711999786	0.000438776826387494	0.00526656986503144	0.0241848423728632	0.0280526463759508
41	1 vs. 15	2	0.9972	0.9971	0.0315	0.9677	0.1389	2	0.997084244897959	0.997079102040816	0.0320324897959184	0.98314506122449	0.13334	2	0.00167378038871567	0.00167997748687571	0.00839505607048402	0.0172091595875419	0.019070642667847
42	1 vs. 15	3	0.9825	0.9684	0.0589	1	0.3889	3	0.978327836734694	0.963547755102041	0.0622181224489796	0.938534775510204	0.40110987755102	3	0.0162470837193968	0.0272804614226038	0.0217686779856555	0.0527818480087459	0.0383368411702942
43	1 vs. 16	1	0.9989	0.999	0.0278	1	0.0556	1	0.998942612244898	0.998988244897959	0.0261798367346939	0.973154367346939	0.0477981224489796	1	0.000443190711999786	0.000438776826387494	0.00526656986503144	0.0241848423728632	0.0280526463759508
44	1 vs. 16	2	0.998	0.9979	0.0274	1	0.1111	2	0.997084244897959	0.997079102040816	0.0320324897959184	0.98314506122449	0.13334	2	0.00167378038871567	0.00167997748687571	0.00839505607048402	0.0172091595875419	0.019070642667847
45	1 vs. 16	3	0.9869	0.9812	0.0508	0.9565	0.3611	3	0.978327836734694	0.963547755102041	0.0622181224489796	0.938534775510204	0.40110987755102	3	0.0162470837193968	0.0272804614226038	0.0217686779856555	0.0527818480087459	0.0383368411702942
46	1 vs. 17	1	0.9993	0.9993	0.0246	1	0.0556	1	0.998942612244898	0.998988244897959	0.0261798367346939	0.973154367346939	0.0477981224489796	1	0.000443190711999786	0.000438776826387494	0.00526656986503144	0.0241848423728632	0.0280526463759508
47	1 vs. 17	2	0.995	0.9954	0.0423	1	0.1111	2	0.997084244897959	0.997079102040816	0.0320324897959184	0.98314506122449	0.13334	2	0.00167378038871567	0.00167997748687571	0.00839505607048402	0.0172091595875419	0.019070642667847
48	1 vs. 17	3	0.9884	0.9793	0.0476	1	0.3889	3	0.978327836734694	0.963547755102041	0.0622181224489796	0.938534775510204	0.40110987755102	3	0.0162470837193968	0.0272804614226038	0.0217686779856555	0.0527818480087459	0.0383368411702942
49	1 vs. 18	1	0.999	0.9989	0.0305	1	0.0556	1	0.998942612244898	0.998988244897959	0.0261798367346939	0.973154367346939	0.0477981224489796	1	0.000443190711999786	0.000438776826387494	0.00526656986503144	0.0241848423728632	0.0280526463759508
50	1 vs. 18	2	0.9936	0.9947	0.0484	0.9677	0.1389	2	0.997084244897959	0.997079102040816	0.0320324897959184	0.98314506122449	0.13334	2	0.00167378038871567	0.00167997748687571	0.00839505607048402	0.0172091595875419	0.019070642667847
51	1 vs. 18	3	0.9798	0.9634	0.0644	1	0.3889	3	0.978327836734694	0.963547755102041	0.0622181224489796	0.938534775510204	0.40110987755102	3	0.0162470837193968	0.0272804614226038	0.0217686779856555	0.0527818480087459	0.0383368411702942
52	1 vs. 19	1	0.9986	0.9986	0.0307	1	0.0556	1	0.998942612244898	0.998988244897959	0.0261798367346939	0.973154367346939	0.0477981224489796	1	0.000443190711999786	0.000438776826387494	0.00526656986503144	0.0241848423728632	0.0280526463759508
53	1 vs. 19	2	0.9972	0.9971	0.032	1	0.1111	2	0.997084244897959	0.997079102040816	0.0320324897959184	0.98314506122449	0.13334	2	0.00167378038871567	0.00167997748687571	0.00839505607048402	0.0172091595875419	0.019070642667847
54	1 vs. 19	3	0.9624	0.9502	0.0887	0.9167	0.3333	3	0.978327836734694	0.963547755102041	0.0622181224489796	0.938534775510204	0.40110987755102	3	0.0162470837193968	0.0272804614226038	0.0217686779856555	0.0527818480087459	0.0383368411702942
55	1 vs. 20	1	0.9985	0.9985	0.0342	0.9714	0.0278	1	0.998942612244898	0.998988244897959	0.0261798367346939	0.973154367346939	0.0477981224489796	1	0.000443190711999786	0.000438776826387494	0.00526656986503144	0.0241848423728632	0.0280526463759508
56	1 vs. 20	2	0.997	0.9969	0.0337	1	0.1111	2	0.997084244897959	0.997079102040816	0.0320324897959184	0.98314506122449	0.13334	2	0.00167378038871567	0.00167997748687571	0.00839505607048402	0.0172091595875419	0.019070642667847
57	1 vs. 20	3	0.9906	0.9839	0.0435	0.9565	0.3611	3	0.978327836734694	0.963547755102041	0.0622181224489796	0.938534775510204	0.40110987755102	3	0.0162470837193968	0.0272804614226038	0.0217686779856555	0.0527818480087459	0.0383368411702942
58	1 vs. 21	1	0.9987	0.9988	0.0318	0.9714	0.0278	1	0.998942612244898	0.998988244897959	0.0261798367346939	0.973154367346939	0.0477981224489796	1	0.000443190711999786	0.000438776826387494	0.00526656986503144	0.0241848423728632	0.0280526463759508
59	1 vs. 21	2	0.9987	0.9988	0.0246	1	0.1111	2	0.997084244897959	0.997079102040816	0.0320324897959184	0.98314506122449	0.13334	2	0.00167378038871567	0.00167997748687571	0.00839505607048402	0.0172091595875419	0.019070642667847
60	1 vs. 21	3	0.987	0.9766	0.0522	1	0.3889	3	0.978327836734694	0.963547755102041	0.0622181224489796	0.938534775510204	0.40110987755102	3	0.0162470837193968	0.0272804614226038	0.0217686779856555	0.0527818480087459	0.0383368411702942
61	1 vs. 22	1	0.999	0.9991	0.0251	1	0.0556	1	0.998942612244898	0.998988244897959	0.0261798367346939	0.973154367346939	0.0477981224489796	1	0.000443190711999786	0.000438776826387494	0.00526656986503144	0.0241848423728632	0.0280526463759508
62	1 vs. 22	2	0.9981	0.9981	0.0265	1	0.1111	2	0.997084244897959	0.997079102040816	0.0320324897959184	0.98314506122449	0.13334	2	0.00167378038871567	0.00167997748687571	0.00839505607048402	0.0172091595875419	0.019070642667847
63	1 vs. 22	3	0.9904	0.9829	0.0435	1	0.3889	3	0.978327836734694	0.963547755102041	0.0622181224489796	0.938534775510204	0.40110987755102	3	0.0162470837193968	0.0272804614226038	0.0217686779856555	0.0527818480087459	0.0383368411702942
64	1 vs. 23	1	0.9991	0.9992	0.0264	1	0.0556	1	0.998942612244898	0.998988244897959	0.0261798367346939	0.973154367346939	0.0477981224489796	1	0.000443190711999786	0.000438776826387494	0.00526656986503144	0.0241848423728632	0.0280526463759508
65	1 vs. 23	2	0.9982	0.9983	0.0275	1	0.1111	2	0.997084244897959	0.997079102040816	0.0320324897959184	0.98314506122449	0.13334	2	0.00167378038871567	0.00167997748687571	0.00839505607048402	0.0172091595875419	0.019070642667847
66	1 vs. 23	3	0.991	0.986	0.0423	1	0.3889	3	0.978327836734694	0.963547755102041	0.0622181224489796	0.938534775510204	0.40110987755102	3	0.0162470837193968	0.0272804614226038	0.0217686779856555	0.0527818480087459	0.0383368411702942
67	1 vs. 24	1	0.9994	0.9994	0.0225	0.9714	0.0278	1	0.998942612244898	0.998988244897959	0.0261798367346939	0.973154367346939	0.0477981224489796	1	0.000443190711999786	0.000438776826387494	0.00526656986503144	0.0241848423728632	0.0280526463759508
68	1 vs. 24	2	0.9976	0.9977	0.0294	0.9677	0.1389	2	0.997084244897959	0.997079102040816	0.0320324897959184	0.98314506122449	0.13334	2	0.00167378038871567	0.00167997748687571	0.00839505607048402	0.0172091595875419	0.019070642667847
69	1 vs. 24	3	0.979	0.9615	0.064	1	0.3889	3	0.978327836734694	0.963547755102041	0.0622181224489796	0.938534775510204	0.40110987755102	3	0.0162470837193968	0.0272804614226038	0.0217686779856555	0.0527818480087459	0.0383368411702942
70	1 vs. 25	1	0.9994	0.9994	0.0194	0.9714	0.0278	1	0.998942612244898	0.998988244897959	0.0261798367346939	0.973154367346939	0.0477981224489796	1	0.000443190711999786	0.000438776826387494	0.00526656986503144	0.0241848423728632	0.0280526463759508
71	1 vs. 25	2	0.9971	0.9974	0.0328	0.9677	0.1389	2	0.997084244897959	0.997079102040816	0.0320324897959184	0.98314506122449	0.13334	2	0.00167378038871567	0.00167997748687571	0.00839505607048402	0.0172091595875419	0.019070642667847
72	1 vs. 25	3	0.993	0.9878	0.0408	1	0.3889	3	0.978327836734694	0.963547755102041	0.0622181224489796	0.938534775510204	0.40110987755102	3	0.0162470837193968	0.0272804614226038	0.0217686779856555	0.0527818480087459	0.0383368411702942
73	1 vs. 26	1	0.9993	0.9993	0.0212	0.9714	0.0278	1	0.998942612244898	0.998988244897959	0.0261798367346939	0.973154367346939	0.0477981224489796	1	0.000443190711999786	0.000438776826387494	0.00526656986503144	0.0241848423728632	0.0280526463759508
74	1 vs. 26	2	0.9989	0.999	0.0203	0.9677	0.1389	2	0.997084244897959	0.997079102040816	0.0320324897959184	0.98314506122449	0.13334	2	0.00167378038871567	0.00167997748687571	0.00839505607048402	0.0172091595875419	0.019070642667847
75	1 vs. 26	3	0.9839	0.9705	0.0588	1	0.3889	3	0.978327836734694	0.963547755102041	0.0622181224489796	0.938534775510204	0.40110987755102	3	0.0162470837193968	0.0272804614226038	0.0217686779856555	0.0527818480087459	0.0383368411702942
76	1 vs. 27	1	0.9994	0.9994	0.0203	0.9697	0.0833	1	0.998942612244898	0.998988244897959	0.0261798367346939	0.973154367346939	0.0477981224489796	1	0.000443190711999786	0.000438776826387494	0.00526656986503144	0.0241848423728632	0.0280526463759508
77	1 vs. 27	2	0.9984	0.9984	0.0239	1	0.1111	2	0.997084244897959	0.997079102040816	0.0320324897959184	0.98314506122449	0.13334	2	0.00167378038871567	0.00167997748687571	0.00839505607048402	0.0172091595875419	0.019070642667847
78	1 vs. 27	3	0.9502	0.9203	0.098	0.8	0.4444	3	0.978327836734694	0.963547755102041	0.0622181224489796	0.938534775510204	0.40110987755102	3	0.0162470837193968	0.0272804614226038	0.0217686779856555	0.0527818480087459	0.0383368411702942
79	1 vs. 28	1	0.9991	0.9993	0.0247	0.9714	0.0278	1	0.998942612244898	0.998988244897959	0.0261798367346939	0.973154367346939	0.0477981224489796	1	0.000443190711999786	0.000438776826387494	0.00526656986503144	0.0241848423728632	0.0280526463759508
80	1 vs. 28	2	0.9983	0.9983	0.0247	1	0.1111	2	0.997084244897959	0.997079102040816	0.0320324897959184	0.98314506122449	0.13334	2	0.00167378038871567	0.00167997748687571	0.00839505607048402	0.0172091595875419	0.019070642667847
81	1 vs. 28	3	0.9901	0.982	0.0441	0.9524	0.4167	3	0.978327836734694	0.963547755102041	0.0622181224489796	0.938534775510204	0.40110987755102	3	0.0162470837193968	0.0272804614226038	0.0217686779856555	0.0527818480087459	0.0383368411702942
82	1 vs. 29	1	0.9996	0.9996	0.017	1	0.0556	1	0.998942612244898	0.998988244897959	0.0261798367346939	0.973154367346939	0.0477981224489796	1	0.000443190711999786	0.000438776826387494	0.00526656986503144	0.0241848423728632	0.0280526463759508
83	1 vs. 29	2	0.9989	0.9988	0.0203	1	0.1111	2	0.997084244897959	0.997079102040816	0.0320324897959184	0.98314506122449	0.13334	2	0.00167378038871567	0.00167997748687571	0.00839505607048402	0.0172091595875419	0.019070642667847
84	1 vs. 29	3	0.9844	0.9753	0.0552	1	0.3889	3	0.978327836734694	0.963547755102041	0.0622181224489796	0.938534775510204	0.40110987755102	3	0.0162470837193968	0.0272804614226038	0.0217686779856555	0.0527818480087459	0.0383368411702942
85	1 vs. 30	1	0.9993	0.9994	0.0229	0.9714	0.0278	1	0.998942612244898	0.998988244897959	0.0261798367346939	0.973154367346939	0.0477981224489796	1	0.000443190711999786	0.000438776826387494	0.00526656986503144	0.0241848423728632	0.0280526463759508
86	1 vs. 30	2	0.9981	0.998	0.0277	0.9677	0.1389	2	0.997084244897959	0.997079102040816	0.0320324897959184	0.98314506122449	0.13334	2	0.00167378038871567	0.00167997748687571	0.00839505607048402	0.0172091595875419	0.019070642667847
87	1 vs. 30	3	0.9704	0.9453	0.0758	0.9	0.4444	3	0.978327836734694	0.963547755102041	0.0622181224489796	0.938534775510204	0.40110987755102	3	0.0162470837193968	0.0272804614226038	0.0217686779856555	0.0527818480087459	0.0383368411702942
88	1 vs. 31	1	0.9989	0.9989	0.0295	0.9412	0.0556	1	0.998942612244898	0.998988244897959	0.0261798367346939	0.973154367346939	0.0477981224489796	1	0.000443190711999786	0.000438776826387494	0.00526656986503144	0.0241848423728632	0.0280526463759508
89	1 vs. 31	2	0.9971	0.9973	0.0339	1	0.1111	2	0.997084244897959	0.997079102040816	0.0320324897959184	0.98314506122449	0.13334	2	0.00167378038871567	0.00167997748687571	0.00839505607048402	0.0172091595875419	0.019070642667847
90	1 vs. 31	3	0.9626	0.9325	0.0853	0.9524	0.4167	3	0.978327836734694	0.963547755102041	0.0622181224489796	0.938534775510204	0.40110987755102	3	0.0162470837193968	0.0272804614226038	0.0217686779856555	0.0527818480087459	0.0383368411702942
91	1 vs. 32	1	0.9996	0.9996	0.0157	1	0.0556	1	0.998942612244898	0.998988244897959	0.0261798367346939	0.973154367346939	0.0477981224489796	1	0.000443190711999786	0.000438776826387494	0.00526656986503144	0.0241848423728632	0.0280526463759508
92	1 vs. 32	2	0.9984	0.9984	0.0265	1	0.1111	2	0.997084244897959	0.997079102040816	0.0320324897959184	0.98314506122449	0.13334	2	0.00167378038871567	0.00167997748687571	0.00839505607048402	0.0172091595875419	0.019070642667847
93	1 vs. 32	3	0.9805	0.9661	0.0619	0.9565	0.3611	3	0.978327836734694	0.963547755102041	0.0622181224489796	0.938534775510204	0.40110987755102	3	0.0162470837193968	0.0272804614226038	0.0217686779856555	0.0527818480087459	0.0383368411702942
94	1 vs. 33	1	0.999	0.9991	0.0261	0.9375	0.1111	1	0.998942612244898	0.998988244897959	0.0261798367346939	0.973154367346939	0.0477981224489796	1	0.000443190711999786	0.000438776826387494	0.00526656986503144	0.0241848423728632	0.0280526463759508
95	1 vs. 33	2	0.9955	0.9954	0.0401	0.9677	0.1389	2	0.997084244897959	0.997079102040816	0.0320324897959184	0.98314506122449	0.13334	2	0.00167378038871567	0.00167997748687571	0.00839505607048402	0.0172091595875419	0.019070642667847
96	1 vs. 33	3	0.9859	0.9749	0.0525	0.9	0.4444	3	0.978327836734694	0.963547755102041	0.0622181224489796	0.938534775510204	0.40110987755102	3	0.0162470837193968	0.0272804614226038	0.0217686779856555	0.0527818480087459	0.0383368411702942
97	1 vs. 34	1	0.9994	0.9996	0.0199	1	0.0556	1	0.998942612244898	0.998988244897959	0.0261798367346939	0.973154367346939	0.0477981224489796	1	0.000443190711999786	0.000438776826387494	0.00526656986503144	0.0241848423728632	0.0280526463759508
98	1 vs. 34	2	0.9975	0.9975	0.0297	1	0.1111	2	0.997084244897959	0.997079102040816	0.0320324897959184	0.98314506122449	0.13334	2	0.00167378038871567	0.00167997748687571	0.00839505607048402	0.0172091595875419	0.019070642667847
99	1 vs. 34	3	0.9966	0.9938	0.0259	1	0.3889	3	0.978327836734694	0.963547755102041	0.0622181224489796	0.938534775510204	0.40110987755102	3	0.0162470837193968	0.0272804614226038	0.0217686779856555	0.0527818480087459	0.0383368411702942
100	1 vs. 35	1	0.9997	0.9997	0.0141	1	0.0556	1	0.998942612244898	0.998988244897959	0.0261798367346939	0.973154367346939	0.0477981224489796	1	0.000443190711999786	0.000438776826387494	0.00526656986503144	0.0241848423728632	0.0280526463759508
101	1 vs. 35	2	0.9987	0.9987	0.0226	0.9677	0.1389	2	0.997084244897959	0.997079102040816	0.0320324897959184	0.98314506122449	0.13334	2	0.00167378038871567	0.00167997748687571	0.00839505607048402	0.0172091595875419	0.019070642667847
102	1 vs. 35	3	0.9925	0.9869	0.0383	1	0.3889	3	0.978327836734694	0.963547755102041	0.0622181224489796	0.938534775510204	0.40110987755102	3	0.0162470837193968	0.0272804614226038	0.0217686779856555	0.0527818480087459	0.0383368411702942
103	1 vs. 36	1	0.999	0.999	0.0257	1	0.0556	1	0.998942612244898	0.998988244897959	0.0261798367346939	0.973154367346939	0.0477981224489796	1	0.000443190711999786	0.000438776826387494	0.00526656986503144	0.0241848423728632	0.0280526463759508
104	1 vs. 36	2	0.9976	0.9975	0.0303	1	0.1111	2	0.997084244897959	0.997079102040816	0.0320324897959184	0.98314506122449	0.13334	2	0.00167378038871567	0.00167997748687571	0.00839505607048402	0.0172091595875419	0.019070642667847
105	1 vs. 36	3	0.9826	0.9693	0.0584	0.9565	0.3611	3	0.978327836734694	0.963547755102041	0.0622181224489796	0.938534775510204	0.40110987755102	3	0.0162470837193968	0.0272804614226038	0.0217686779856555	0.0527818480087459	0.0383368411702942
106	1 vs. 37	1	0.9996	0.9996	0.0194	0.9697	0.0833	1	0.998942612244898	0.998988244897959	0.0261798367346939	0.973154367346939	0.0477981224489796	1	0.000443190711999786	0.000438776826387494	0.00526656986503144	0.0241848423728632	0.0280526463759508
107	1 vs. 37	2	0.9978	0.9978	0.0284	0.9677	0.1389	2	0.997084244897959	0.997079102040816	0.0320324897959184	0.98314506122449	0.13334	2	0.00167378038871567	0.00167997748687571	0.00839505607048402	0.0172091595875419	0.019070642667847
108	1 vs. 37	3	0.9764	0.9565	0.0681	0.9524	0.4167	3	0.978327836734694	0.963547755102041	0.0622181224489796	0.938534775510204	0.40110987755102	3	0.0162470837193968	0.0272804614226038	0.0217686779856555	0.0527818480087459	0.0383368411702942
109	1 vs. 38	1	0.9992	0.9992	0.0312	1	0.0556	1	0.998942612244898	0.998988244897959	0.0261798367346939	0.973154367346939	0.0477981224489796	1	0.000443190711999786	0.000438776826387494	0.00526656986503144	0.0241848423728632	0.0280526463759508
110	1 vs. 38	2	0.9971	0.9973	0.0325	1	0.1111	2	0.997084244897959	0.997079102040816	0.0320324897959184	0.98314506122449	0.13334	2	0.00167378038871567	0.00167997748687571	0.00839505607048402	0.0172091595875419	0.019070642667847
111	1 vs. 38	3	0.9767	0.9574	0.0673	0.9	0.4444	3	0.978327836734694	0.963547755102041	0.0622181224489796	0.938534775510204	0.40110987755102	3	0.0162470837193968	0.0272804614226038	0.0217686779856555	0.0527818480087459	0.0383368411702942
112	1 vs. 39	1	0.9995	0.9995	0.018	1	0.0556	1	0.998942612244898	0.998988244897959	0.0261798367346939	0.973154367346939	0.0477981224489796	1	0.000443190711999786	0.000438776826387494	0.00526656986503144	0.0241848423728632	0.0280526463759508
113	1 vs. 39	2	0.9976	0.9975	0.0293	0.9677	0.1389	2	0.997084244897959	0.997079102040816	0.0320324897959184	0.98314506122449	0.13334	2	0.00167378038871567	0.00167997748687571	0.00839505607048402	0.0172091595875419	0.019070642667847
114	1 vs. 39	3	0.9917	0.9849	0.0403	1	0.3889	3	0.978327836734694	0.963547755102041	0.0622181224489796	0.938534775510204	0.40110987755102	3	0.0162470837193968	0.0272804614226038	0.0217686779856555	0.0527818480087459	0.0383368411702942
115	1 vs. 40	1	0.9992	0.9992	0.0236	1	0.0556	1	0.998942612244898	0.998988244897959	0.0261798367346939	0.973154367346939	0.0477981224489796	1	0.000443190711999786	0.000438776826387494	0.00526656986503144	0.0241848423728632	0.0280526463759508
116	1 vs. 40	2	0.9974	0.9973	0.0307	1	0.1111	2	0.997084244897959	0.997079102040816	0.0320324897959184	0.98314506122449	0.13334	2	0.00167378038871567	0.00167997748687571	0.00839505607048402	0.0172091595875419	0.019070642667847
117	1 vs. 40	3	0.9711	0.9475	0.0756	0.9	0.4444	3	0.978327836734694	0.963547755102041	0.0622181224489796	0.938534775510204	0.40110987755102	3	0.0162470837193968	0.0272804614226038	0.0217686779856555	0.0527818480087459	0.0383368411702942
118	1 vs. 41	1	0.9994	0.9995	0.0217	0.9714	0.0278	1	0.998942612244898	0.998988244897959	0.0261798367346939	0.973154367346939	0.0477981224489796	1	0.000443190711999786	0.000438776826387494	0.00526656986503144	0.0241848423728632	0.0280526463759508
119	1 vs. 41	2	0.9982	0.9982	0.0262	0.9677	0.1389	2	0.997084244897959	0.997079102040816	0.0320324897959184	0.98314506122449	0.13334	2	0.00167378038871567	0.00167997748687571	0.00839505607048402	0.0172091595875419	0.019070642667847
120	1 vs. 41	3	0.9884	0.9788	0.0476	0.9565	0.3611	3	0.978327836734694	0.963547755102041	0.0622181224489796	0.938534775510204	0.40110987755102	3	0.0162470837193968	0.0272804614226038	0.0217686779856555	0.0527818480087459	0.0383368411702942
121	1 vs. 42	1	0.9984	0.9985	0.0314	0.9714	0.0278	1	0.998942612244898	0.998988244897959	0.0261798367346939	0.973154367346939	0.0477981224489796	1	0.000443190711999786	0.000438776826387494	0.00526656986503144	0.0241848423728632	0.0280526463759508
122	1 vs. 42	2	0.9929	0.9928	0.0509	1	0.1111	2	0.997084244897959	0.997079102040816	0.0320324897959184	0.98314506122449	0.13334	2	0.00167378038871567	0.00167997748687571	0.00839505607048402	0.0172091595875419	0.019070642667847
123	1 vs. 42	3	0.9958	0.9931	0.0287	0.9524	0.4167	3	0.978327836734694	0.963547755102041	0.0622181224489796	0.938534775510204	0.40110987755102	3	0.0162470837193968	0.0272804614226038	0.0217686779856555	0.0527818480087459	0.0383368411702942
124	1 vs. 43	1	0.9992	0.9992	0.0225	1	0.0556	1	0.998942612244898	0.998988244897959	0.0261798367346939	0.973154367346939	0.0477981224489796	1	0.000443190711999786	0.000438776826387494	0.00526656986503144	0.0241848423728632	0.0280526463759508
125	1 vs. 43	2	0.999	0.9989	0.0193	1	0.1111	2	0.997084244897959	0.997079102040816	0.0320324897959184	0.98314506122449	0.13334	2	0.00167378038871567	0.00167997748687571	0.00839505607048402	0.0172091595875419	0.019070642667847
126	1 vs. 43	3	0.9781	0.9608	0.0652	0.9	0.4444	3	0.978327836734694	0.963547755102041	0.0622181224489796	0.938534775510204	0.40110987755102	3	0.0162470837193968	0.0272804614226038	0.0217686779856555	0.0527818480087459	0.0383368411702942
127	1 vs. 44	1	0.9993	0.9993	0.0242	1	0.0556	1	0.998942612244898	0.998988244897959	0.0261798367346939	0.973154367346939	0.0477981224489796	1	0.000443190711999786	0.000438776826387494	0.00526656986503144	0.0241848423728632	0.0280526463759508
128	1 vs. 44	2	0.9976	0.9976	0.0299	1	0.1111	2	0.997084244897959	0.997079102040816	0.0320324897959184	0.98314506122449	0.13334	2	0.00167378038871567	0.00167997748687571	0.00839505607048402	0.0172091595875419	0.019070642667847
129	1 vs. 44	3	0.9874	0.9783	0.0499	1	0.3889	3	0.978327836734694	0.963547755102041	0.0622181224489796	0.938534775510204	0.40110987755102	3	0.0162470837193968	0.0272804614226038	0.0217686779856555	0.0527818480087459	0.0383368411702942
130	1 vs. 45	1	0.9989	0.9989	0.0267	1	0.0556	1	0.998942612244898	0.998988244897959	0.0261798367346939	0.973154367346939	0.0477981224489796	1	0.000443190711999786	0.000438776826387494	0.00526656986503144	0.0241848423728632	0.0280526463759508
131	1 vs. 45	2	0.9985	0.9986	0.0239	1	0.1111	2	0.997084244897959	0.997079102040816	0.0320324897959184	0.98314506122449	0.13334	2	0.00167378038871567	0.00167997748687571	0.00839505607048402	0.0172091595875419	0.019070642667847
132	1 vs. 45	3	0.9976	0.9961	0.0217	1	0.3889	3	0.978327836734694	0.963547755102041	0.0622181224489796	0.938534775510204	0.40110987755102	3	0.0162470837193968	0.0272804614226038	0.0217686779856555	0.0527818480087459	0.0383368411702942
133	1 vs. 46	1	0.9994	0.9994	0.0212	0.9697	0.0833	1	0.998942612244898	0.998988244897959	0.0261798367346939	0.973154367346939	0.0477981224489796	1	0.000443190711999786	0.000438776826387494	0.00526656986503144	0.0241848423728632	0.0280526463759508
134	1 vs. 46	2	0.9985	0.9989	0.0233	0.9677	0.1389	2	0.997084244897959	0.997079102040816	0.0320324897959184	0.98314506122449	0.13334	2	0.00167378038871567	0.00167997748687571	0.00839505607048402	0.0172091595875419	0.019070642667847
135	1 vs. 46	3	0.987	0.9761	0.0504	0.9524	0.4167	3	0.978327836734694	0.963547755102041	0.0622181224489796	0.938534775510204	0.40110987755102	3	0.0162470837193968	0.0272804614226038	0.0217686779856555	0.0527818480087459	0.0383368411702942
136	1 vs. 47	1	0.9997	0.9997	0.015	1	0.0556	1	0.998942612244898	0.998988244897959	0.0261798367346939	0.973154367346939	0.0477981224489796	1	0.000443190711999786	0.000438776826387494	0.00526656986503144	0.0241848423728632	0.0280526463759508
137	1 vs. 47	2	0.9989	0.999	0.0199	0.9677	0.1389	2	0.997084244897959	0.997079102040816	0.0320324897959184	0.98314506122449	0.13334	2	0.00167378038871567	0.00167997748687571	0.00839505607048402	0.0172091595875419	0.019070642667847
138	1 vs. 47	3	0.9891	0.9801	0.0465	1	0.3889	3	0.978327836734694	0.963547755102041	0.0622181224489796	0.938534775510204	0.40110987755102	3	0.0162470837193968	0.0272804614226038	0.0217686779856555	0.0527818480087459	0.0383368411702942
139	1 vs. 48	1	0.9996	0.9997	0.0174	0.9412	0.0556	1	0.998942612244898	0.998988244897959	0.0261798367346939	0.973154367346939	0.0477981224489796	1	0.000443190711999786	0.000438776826387494	0.00526656986503144	0.0241848423728632	0.0280526463759508
140	1 vs. 48	2	0.9971	0.997	0.0342	1	0.1111	2	0.997084244897959	0.997079102040816	0.0320324897959184	0.98314506122449	0.13334	2	0.00167378038871567	0.00167997748687571	0.00839505607048402	0.0172091595875419	0.019070642667847
141	1 vs. 48	3	0.9889	0.9803	0.0466	1	0.3889	3	0.978327836734694	0.963547755102041	0.0622181224489796	0.938534775510204	0.40110987755102	3	0.0162470837193968	0.0272804614226038	0.0217686779856555	0.0527818480087459	0.0383368411702942
142	1 vs. 49	1	0.9988	0.9988	0.0281	0.9714	0.0278	1	0.998942612244898	0.998988244897959	0.0261798367346939	0.973154367346939	0.0477981224489796	1	0.000443190711999786	0.000438776826387494	0.00526656986503144	0.0241848423728632	0.0280526463759508
143	1 vs. 49	2	0.9973	0.9974	0.0329	0.9677	0.1389	2	0.997084244897959	0.997079102040816	0.0320324897959184	0.98314506122449	0.13334	2	0.00167378038871567	0.00167997748687571	0.00839505607048402	0.0172091595875419	0.019070642667847
144	1 vs. 49	3	0.9872	0.9771	0.0521	1	0.3889	3	0.978327836734694	0.963547755102041	0.0622181224489796	0.938534775510204	0.40110987755102	3	0.0162470837193968	0.0272804614226038	0.0217686779856555	0.0527818480087459	0.0383368411702942
145	1 vs. 50	1	0.9986	0.9989	0.0302	0.9375	0.1111	1	0.998942612244898	0.998988244897959	0.0261798367346939	0.973154367346939	0.0477981224489796	1	0.000443190711999786	0.000438776826387494	0.00526656986503144	0.0241848423728632	0.0280526463759508
146	1 vs. 50	2	0.9966	0.9966	0.035	1	0.1111	2	0.997084244897959	0.997079102040816	0.0320324897959184	0.98314506122449	0.13334	2	0.00167378038871567	0.00167997748687571	0.00839505607048402	0.0172091595875419	0.019070642667847
147	1 vs. 50	3	0.9877	0.9777	0.049	0.9524	0.4167	3	0.978327836734694	0.963547755102041	0.0622181224489796	0.938534775510204	0.40110987755102	3	0.0162470837193968	0.0272804614226038	0.0217686779856555	0.0527818480087459	0.0383368411702942
148	2 vs. 3	1	0.9993	0.9994	0.0216	0.9714	0.0278	1	0.998942612244898	0.998988244897959	0.0261798367346939	0.973154367346939	0.0477981224489796	1	0.000443190711999786	0.000438776826387494	0.00526656986503144	0.0241848423728632	0.0280526463759508
149	2 vs. 3	2	0.9992	0.9991	0.0176	0.9677	0.1389	2	0.997084244897959	0.997079102040816	0.0320324897959184	0.98314506122449	0.13334	2	0.00167378038871567	0.00167997748687571	0.00839505607048402	0.0172091595875419	0.019070642667847
150	2 vs. 3	3	0.9913	0.9851	0.0416	0.9565	0.3611	3	0.978327836734694	0.963547755102041	0.0622181224489796	0.938534775510204	0.40110987755102	3	0.0162470837193968	0.0272804614226038	0.0217686779856555	0.0527818480087459	0.0383368411702942
151	2 vs. 4	1	0.9989	0.9992	0.0269	1	0	1	0.998942612244898	0.998988244897959	0.0261798367346939	0.973154367346939	0.0477981224489796	1	0.000443190711999786	0.000438776826387494	0.00526656986503144	0.0241848423728632	0.0280526463759508
152	2 vs. 4	2	0.9981	0.998	0.028	1	0.1111	2	0.997084244897959	0.997079102040816	0.0320324897959184	0.98314506122449	0.13334	2	0.00167378038871567	0.00167997748687571	0.00839505607048402	0.0172091595875419	0.019070642667847
153	2 vs. 4	3	0.9965	0.9945	0.0272	1	0.3333	3	0.978327836734694	0.963547755102041	0.0622181224489796	0.938534775510204	0.40110987755102	3	0.0162470837193968	0.0272804614226038	0.0217686779856555	0.0527818480087459	0.0383368411702942
154	2 vs. 5	1	0.9986	0.9989	0.0298	0.9714	0.0278	1	0.998942612244898	0.998988244897959	0.0261798367346939	0.973154367346939	0.0477981224489796	1	0.000443190711999786	0.000438776826387494	0.00526656986503144	0.0241848423728632	0.0280526463759508
155	2 vs. 5	2	0.9978	0.9977	0.0283	1	0.1111	2	0.997084244897959	0.997079102040816	0.0320324897959184	0.98314506122449	0.13334	2	0.00167378038871567	0.00167997748687571	0.00839505607048402	0.0172091595875419	0.019070642667847
156	2 vs. 5	3	0.9825	0.9763	0.0588	0.9091	0.3889	3	0.978327836734694	0.963547755102041	0.0622181224489796	0.938534775510204	0.40110987755102	3	0.0162470837193968	0.0272804614226038	0.0217686779856555	0.0527818480087459	0.0383368411702942
157	2 vs. 6	1	0.9989	0.9992	0.0269	0.9714	0.0278	1	0.998942612244898	0.998988244897959	0.0261798367346939	0.973154367346939	0.0477981224489796	1	0.000443190711999786	0.000438776826387494	0.00526656986503144	0.0241848423728632	0.0280526463759508
158	2 vs. 6	2	0.997	0.9969	0.0342	1	0.1111	2	0.997084244897959	0.997079102040816	0.0320324897959184	0.98314506122449	0.13334	2	0.00167378038871567	0.00167997748687571	0.00839505607048402	0.0172091595875419	0.019070642667847
159	2 vs. 6	3	0.9883	0.9803	0.0482	1	0.3333	3	0.978327836734694	0.963547755102041	0.0622181224489796	0.938534775510204	0.40110987755102	3	0.0162470837193968	0.0272804614226038	0.0217686779856555	0.0527818480087459	0.0383368411702942
160	2 vs. 7	1	0.999	0.9994	0.0249	0.9714	0.0278	1	0.998942612244898	0.998988244897959	0.0261798367346939	0.973154367346939	0.0477981224489796	1	0.000443190711999786	0.000438776826387494	0.00526656986503144	0.0241848423728632	0.0280526463759508
161	2 vs. 7	2	0.998	0.9979	0.0266	0.9677	0.1389	2	0.997084244897959	0.997079102040816	0.0320324897959184	0.98314506122449	0.13334	2	0.00167378038871567	0.00167997748687571	0.00839505607048402	0.0172091595875419	0.019070642667847
162	2 vs. 7	3	0.9912	0.9854	0.0432	0.9565	0.3611	3	0.978327836734694	0.963547755102041	0.0622181224489796	0.938534775510204	0.40110987755102	3	0.0162470837193968	0.0272804614226038	0.0217686779856555	0.0527818480087459	0.0383368411702942
163	2 vs. 8	1	0.9981	0.9982	0.0349	0.9714	0.0278	1	0.998942612244898	0.998988244897959	0.0261798367346939	0.973154367346939	0.0477981224489796	1	0.000443190711999786	0.000438776826387494	0.00526656986503144	0.0241848423728632	0.0280526463759508
164	2 vs. 8	2	0.9967	0.9971	0.0343	0.9677	0.1389	2	0.997084244897959	0.997079102040816	0.0320324897959184	0.98314506122449	0.13334	2	0.00167378038871567	0.00167997748687571	0.00839505607048402	0.0172091595875419	0.019070642667847
165	2 vs. 8	3	0.9334	0.8823	0.1149	0.7826	0.3611	3	0.978327836734694	0.963547755102041	0.0622181224489796	0.938534775510204	0.40110987755102	3	0.0162470837193968	0.0272804614226038	0.0217686779856555	0.0527818480087459	0.0383368411702942
166	2 vs. 9	1	0.9987	0.9987	0.0296	1	0	1	0.998942612244898	0.998988244897959	0.0261798367346939	0.973154367346939	0.0477981224489796	1	0.000443190711999786	0.000438776826387494	0.00526656986503144	0.0241848423728632	0.0280526463759508
167	2 vs. 9	2	0.9982	0.9981	0.0255	1	0.1111	2	0.997084244897959	0.997079102040816	0.0320324897959184	0.98314506122449	0.13334	2	0.00167378038871567	0.00167997748687571	0.00839505607048402	0.0172091595875419	0.019070642667847
168	2 vs. 9	3	0.9903	0.9844	0.0449	0.9565	0.3611	3	0.978327836734694	0.963547755102041	0.0622181224489796	0.938534775510204	0.40110987755102	3	0.0162470837193968	0.0272804614226038	0.0217686779856555	0.0527818480087459	0.0383368411702942
169	2 vs. 10	1	0.999	0.999	0.0259	0.9412	0.0556	1	0.998942612244898	0.998988244897959	0.0261798367346939	0.973154367346939	0.0477981224489796	1	0.000443190711999786	0.000438776826387494	0.00526656986503144	0.0241848423728632	0.0280526463759508
170	2 vs. 10	2	0.9986	0.9985	0.023	0.9677	0.1389	2	0.997084244897959	0.997079102040816	0.0320324897959184	0.98314506122449	0.13334	2	0.00167378038871567	0.00167997748687571	0.00839505607048402	0.0172091595875419	0.019070642667847
171	2 vs. 10	3	0.9703	0.949	0.0775	0.9091	0.3889	3	0.978327836734694	0.963547755102041	0.0622181224489796	0.938534775510204	0.40110987755102	3	0.0162470837193968	0.0272804614226038	0.0217686779856555	0.0527818480087459	0.0383368411702942
172	2 vs. 11	1	0.999	0.9991	0.0249	0.9714	0.0278	1	0.998942612244898	0.998988244897959	0.0261798367346939	0.973154367346939	0.0477981224489796	1	0.000443190711999786	0.000438776826387494	0.00526656986503144	0.0241848423728632	0.0280526463759508
173	2 vs. 11	2	0.9982	0.9981	0.0267	0.9677	0.1389	2	0.997084244897959	0.997079102040816	0.0320324897959184	0.98314506122449	0.13334	2	0.00167378038871567	0.00167997748687571	0.00839505607048402	0.0172091595875419	0.019070642667847
174	2 vs. 11	3	0.9748	0.96	0.0703	0.9167	0.3333	3	0.978327836734694	0.963547755102041	0.0622181224489796	0.938534775510204	0.40110987755102	3	0.0162470837193968	0.0272804614226038	0.0217686779856555	0.0527818480087459	0.0383368411702942
175	2 vs. 12	1	0.9988	0.999	0.0274	1	0	1	0.998942612244898	0.998988244897959	0.0261798367346939	0.973154367346939	0.0477981224489796	1	0.000443190711999786	0.000438776826387494	0.00526656986503144	0.0241848423728632	0.0280526463759508
176	2 vs. 12	2	0.9986	0.9985	0.0232	0.9677	0.1389	2	0.997084244897959	0.997079102040816	0.0320324897959184	0.98314506122449	0.13334	2	0.00167378038871567	0.00167997748687571	0.00839505607048402	0.0172091595875419	0.019070642667847
177	2 vs. 12	3	0.9674	0.9435	0.0799	0.8571	0.4167	3	0.978327836734694	0.963547755102041	0.0622181224489796	0.938534775510204	0.40110987755102	3	0.0162470837193968	0.0272804614226038	0.0217686779856555	0.0527818480087459	0.0383368411702942
178	2 vs. 13	1	0.9989	0.9989	0.0271	0.9714	0.0278	1	0.998942612244898	0.998988244897959	0.0261798367346939	0.973154367346939	0.0477981224489796	1	0.000443190711999786	0.000438776826387494	0.00526656986503144	0.0241848423728632	0.0280526463759508
179	2 vs. 13	2	0.9979	0.9978	0.028	1	0.1111	2	0.997084244897959	0.997079102040816	0.0320324897959184	0.98314506122449	0.13334	2	0.00167378038871567	0.00167997748687571	0.00839505607048402	0.0172091595875419	0.019070642667847
180	2 vs. 13	3	0.9917	0.9858	0.0411	0.9091	0.3889	3	0.978327836734694	0.963547755102041	0.0622181224489796	0.938534775510204	0.40110987755102	3	0.0162470837193968	0.0272804614226038	0.0217686779856555	0.0527818480087459	0.0383368411702942
181	2 vs. 14	1	0.9991	0.9992	0.0236	1	0	1	0.998942612244898	0.998988244897959	0.0261798367346939	0.973154367346939	0.0477981224489796	1	0.000443190711999786	0.000438776826387494	0.00526656986503144	0.0241848423728632	0.0280526463759508
182	2 vs. 14	2	0.9993	0.9993	0.016	1	0.1111	2	0.997084244897959	0.997079102040816	0.0320324897959184	0.98314506122449	0.13334	2	0.00167378038871567	0.00167997748687571	0.00839505607048402	0.0172091595875419	0.019070642667847
183	2 vs. 14	3	0.9982	0.9969	0.0192	1	0.3333	3	0.978327836734694	0.963547755102041	0.0622181224489796	0.938534775510204	0.40110987755102	3	0.0162470837193968	0.0272804614226038	0.0217686779856555	0.0527818480087459	0.0383368411702942
184	2 vs. 15	1	0.9987	0.9989	0.0286	0.9714	0.0278	1	0.998942612244898	0.998988244897959	0.0261798367346939	0.973154367346939	0.0477981224489796	1	0.000443190711999786	0.000438776826387494	0.00526656986503144	0.0241848423728632	0.0280526463759508
185	2 vs. 15	2	0.9964	0.9966	0.0357	0.9677	0.1389	2	0.997084244897959	0.997079102040816	0.0320324897959184	0.98314506122449	0.13334	2	0.00167378038871567	0.00167997748687571	0.00839505607048402	0.0172091595875419	0.019070642667847
186	2 vs. 15	3	0.9694	0.9488	0.0781	0.9565	0.3611	3	0.978327836734694	0.963547755102041	0.0622181224489796	0.938534775510204	0.40110987755102	3	0.0162470837193968	0.0272804614226038	0.0217686779856555	0.0527818480087459	0.0383368411702942
187	2 vs. 16	1	0.9996	0.9996	0.0166	0.9714	0.0278	1	0.998942612244898	0.998988244897959	0.0261798367346939	0.973154367346939	0.0477981224489796	1	0.000443190711999786	0.000438776826387494	0.00526656986503144	0.0241848423728632	0.0280526463759508
188	2 vs. 16	2	0.9985	0.9985	0.0236	1	0.1111	2	0.997084244897959	0.997079102040816	0.0320324897959184	0.98314506122449	0.13334	2	0.00167378038871567	0.00167997748687571	0.00839505607048402	0.0172091595875419	0.019070642667847
189	2 vs. 16	3	0.9953	0.993	0.0305	1	0.3333	3	0.978327836734694	0.963547755102041	0.0622181224489796	0.938534775510204	0.40110987755102	3	0.0162470837193968	0.0272804614226038	0.0217686779856555	0.0527818480087459	0.0383368411702942
190	2 vs. 17	1	0.9991	0.9993	0.0246	0.9714	0.0278	1	0.998942612244898	0.998988244897959	0.0261798367346939	0.973154367346939	0.0477981224489796	1	0.000443190711999786	0.000438776826387494	0.00526656986503144	0.0241848423728632	0.0280526463759508
191	2 vs. 17	2	0.9972	0.9972	0.0318	1	0.1111	2	0.997084244897959	0.997079102040816	0.0320324897959184	0.98314506122449	0.13334	2	0.00167378038871567	0.00167997748687571	0.00839505607048402	0.0172091595875419	0.019070642667847
192	2 vs. 17	3	0.9751	0.9586	0.0702	0.9565	0.3611	3	0.978327836734694	0.963547755102041	0.0622181224489796	0.938534775510204	0.40110987755102	3	0.0162470837193968	0.0272804614226038	0.0217686779856555	0.0527818480087459	0.0383368411702942
193	2 vs. 18	1	0.9984	0.9988	0.0327	0.9714	0.0278	1	0.998942612244898	0.998988244897959	0.0261798367346939	0.973154367346939	0.0477981224489796	1	0.000443190711999786	0.000438776826387494	0.00526656986503144	0.0241848423728632	0.0280526463759508
194	2 vs. 18	2	0.9946	0.9949	0.0445	0.9677	0.1389	2	0.997084244897959	0.997079102040816	0.0320324897959184	0.98314506122449	0.13334	2	0.00167378038871567	0.00167997748687571	0.00839505607048402	0.0172091595875419	0.019070642667847
195	2 vs. 18	3	0.9792	0.967	0.0654	0.9565	0.3611	3	0.978327836734694	0.963547755102041	0.0622181224489796	0.938534775510204	0.40110987755102	3	0.0162470837193968	0.0272804614226038	0.0217686779856555	0.0527818480087459	0.0383368411702942
196	2 vs. 19	1	0.998	0.9984	0.0357	0.9714	0.0278	1	0.998942612244898	0.998988244897959	0.0261798367346939	0.973154367346939	0.0477981224489796	1	0.000443190711999786	0.000438776826387494	0.00526656986503144	0.0241848423728632	0.0280526463759508
197	2 vs. 19	2	0.998	0.998	0.0268	1	0.1111	2	0.997084244897959	0.997079102040816	0.0320324897959184	0.98314506122449	0.13334	2	0.00167378038871567	0.00167997748687571	0.00839505607048402	0.0172091595875419	0.019070642667847
198	2 vs. 19	3	0.9825	0.9783	0.061	0.96	0.3056	3	0.978327836734694	0.963547755102041	0.0622181224489796	0.938534775510204	0.40110987755102	3	0.0162470837193968	0.0272804614226038	0.0217686779856555	0.0527818480087459	0.0383368411702942
199	2 vs. 20	1	0.9987	0.9992	0.029	1	0	1	0.998942612244898	0.998988244897959	0.0261798367346939	0.973154367346939	0.0477981224489796	1	0.000443190711999786	0.000438776826387494	0.00526656986503144	0.0241848423728632	0.0280526463759508
200	2 vs. 20	2	0.9981	0.9981	0.027	1	0.1111	2	0.997084244897959	0.997079102040816	0.0320324897959184	0.98314506122449	0.13334	2	0.00167378038871567	0.00167997748687571	0.00839505607048402	0.0172091595875419	0.019070642667847
201	2 vs. 20	3	0.9727	0.9551	0.0739	0.9167	0.3333	3	0.978327836734694	0.963547755102041	0.0622181224489796	0.938534775510204	0.40110987755102	3	0.0162470837193968	0.0272804614226038	0.0217686779856555	0.0527818480087459	0.0383368411702942
202	2 vs. 21	1	0.9992	0.9993	0.0241	1	0	1	0.998942612244898	0.998988244897959	0.0261798367346939	0.973154367346939	0.0477981224489796	1	0.000443190711999786	0.000438776826387494	0.00526656986503144	0.0241848423728632	0.0280526463759508
203	2 vs. 21	2	0.9982	0.9981	0.0283	1	0.1111	2	0.997084244897959	0.997079102040816	0.0320324897959184	0.98314506122449	0.13334	2	0.00167378038871567	0.00167997748687571	0.00839505607048402	0.0172091595875419	0.019070642667847
204	2 vs. 21	3	0.9723	0.9532	0.0756	0.9565	0.3611	3	0.978327836734694	0.963547755102041	0.0622181224489796	0.938534775510204	0.40110987755102	3	0.0162470837193968	0.0272804614226038	0.0217686779856555	0.0527818480087459	0.0383368411702942
205	2 vs. 22	1	0.9991	0.9992	0.0242	0.9714	0.0278	1	0.998942612244898	0.998988244897959	0.0261798367346939	0.973154367346939	0.0477981224489796	1	0.000443190711999786	0.000438776826387494	0.00526656986503144	0.0241848423728632	0.0280526463759508
206	2 vs. 22	2	0.9989	0.9988	0.0202	1	0.1111	2	0.997084244897959	0.997079102040816	0.0320324897959184	0.98314506122449	0.13334	2	0.00167378038871567	0.00167997748687571	0.00839505607048402	0.0172091595875419	0.019070642667847
207	2 vs. 22	3	0.9812	0.9674	0.0611	0.9565	0.3611	3	0.978327836734694	0.963547755102041	0.0622181224489796	0.938534775510204	0.40110987755102	3	0.0162470837193968	0.0272804614226038	0.0217686779856555	0.0527818480087459	0.0383368411702942
208	2 vs. 23	1	0.9991	0.9992	0.0245	0.9714	0.0278	1	0.998942612244898	0.998988244897959	0.0261798367346939	0.973154367346939	0.0477981224489796	1	0.000443190711999786	0.000438776826387494	0.00526656986503144	0.0241848423728632	0.0280526463759508
209	2 vs. 23	2	0.9977	0.9976	0.0306	1	0.1111	2	0.997084244897959	0.997079102040816	0.0320324897959184	0.98314506122449	0.13334	2	0.00167378038871567	0.00167997748687571	0.00839505607048402	0.0172091595875419	0.019070642667847
210	2 vs. 23	3	0.9789	0.9684	0.0649	0.9565	0.3611	3	0.978327836734694	0.963547755102041	0.0622181224489796	0.938534775510204	0.40110987755102	3	0.0162470837193968	0.0272804614226038	0.0217686779856555	0.0527818480087459	0.0383368411702942
211	2 vs. 24	1	0.9991	0.9993	0.0243	1	0	1	0.998942612244898	0.998988244897959	0.0261798367346939	0.973154367346939	0.0477981224489796	1	0.000443190711999786	0.000438776826387494	0.00526656986503144	0.0241848423728632	0.0280526463759508
212	2 vs. 24	2	0.9967	0.9966	0.0342	0.9677	0.1389	2	0.997084244897959	0.997079102040816	0.0320324897959184	0.98314506122449	0.13334	2	0.00167378038871567	0.00167997748687571	0.00839505607048402	0.0172091595875419	0.019070642667847
213	2 vs. 24	3	0.9854	0.9753	0.0545	0.9565	0.3611	3	0.978327836734694	0.963547755102041	0.0622181224489796	0.938534775510204	0.40110987755102	3	0.0162470837193968	0.0272804614226038	0.0217686779856555	0.0527818480087459	0.0383368411702942
214	2 vs. 25	1	0.9988	0.9991	0.0284	1	0	1	0.998942612244898	0.998988244897959	0.0261798367346939	0.973154367346939	0.0477981224489796	1	0.000443190711999786	0.000438776826387494	0.00526656986503144	0.0241848423728632	0.0280526463759508
215	2 vs. 25	2	0.9979	0.9979	0.0275	0.9677	0.1389	2	0.997084244897959	0.997079102040816	0.0320324897959184	0.98314506122449	0.13334	2	0.00167378038871567	0.00167997748687571	0.00839505607048402	0.0172091595875419	0.019070642667847
216	2 vs. 25	3	0.9804	0.9682	0.0649	0.9565	0.3611	3	0.978327836734694	0.963547755102041	0.0622181224489796	0.938534775510204	0.40110987755102	3	0.0162470837193968	0.0272804614226038	0.0217686779856555	0.0527818480087459	0.0383368411702942
217	2 vs. 26	1	0.9992	0.9994	0.0231	1	0	1	0.998942612244898	0.998988244897959	0.0261798367346939	0.973154367346939	0.0477981224489796	1	0.000443190711999786	0.000438776826387494	0.00526656986503144	0.0241848423728632	0.0280526463759508
218	2 vs. 26	2	0.9992	0.9992	0.0172	0.9677	0.1389	2	0.997084244897959	0.997079102040816	0.0320324897959184	0.98314506122449	0.13334	2	0.00167378038871567	0.00167997748687571	0.00839505607048402	0.0172091595875419	0.019070642667847
219	2 vs. 26	3	0.9806	0.968	0.0641	0.9565	0.3611	3	0.978327836734694	0.963547755102041	0.0622181224489796	0.938534775510204	0.40110987755102	3	0.0162470837193968	0.0272804614226038	0.0217686779856555	0.0527818480087459	0.0383368411702942
220	2 vs. 27	1	0.9989	0.9989	0.027	0.9412	0.0556	1	0.998942612244898	0.998988244897959	0.0261798367346939	0.973154367346939	0.0477981224489796	1	0.000443190711999786	0.000438776826387494	0.00526656986503144	0.0241848423728632	0.0280526463759508
221	2 vs. 27	2	0.9975	0.9977	0.0299	1	0.1111	2	0.997084244897959	0.997079102040816	0.0320324897959184	0.98314506122449	0.13334	2	0.00167378038871567	0.00167997748687571	0.00839505607048402	0.0172091595875419	0.019070642667847
222	2 vs. 27	3	0.9714	0.9542	0.0749	0.8571	0.4167	3	0.978327836734694	0.963547755102041	0.0622181224489796	0.938534775510204	0.40110987755102	3	0.0162470837193968	0.0272804614226038	0.0217686779856555	0.0527818480087459	0.0383368411702942
223	2 vs. 28	1	0.9996	0.9996	0.0158	1	0	1	0.998942612244898	0.998988244897959	0.0261798367346939	0.973154367346939	0.0477981224489796	1	0.000443190711999786	0.000438776826387494	0.00526656986503144	0.0241848423728632	0.0280526463759508
224	2 vs. 28	2	0.9971	0.9973	0.0322	1	0.1111	2	0.997084244897959	0.997079102040816	0.0320324897959184	0.98314506122449	0.13334	2	0.00167378038871567	0.00167997748687571	0.00839505607048402	0.0172091595875419	0.019070642667847
225	2 vs. 28	3	0.9826	0.9716	0.0585	0.9091	0.3889	3	0.978327836734694	0.963547755102041	0.0622181224489796	0.938534775510204	0.40110987755102	3	0.0162470837193968	0.0272804614226038	0.0217686779856555	0.0527818480087459	0.0383368411702942
226	2 vs. 29	1	0.9984	0.9989	0.0317	0.9714	0.0278	1	0.998942612244898	0.998988244897959	0.0261798367346939	0.973154367346939	0.0477981224489796	1	0.000443190711999786	0.000438776826387494	0.00526656986503144	0.0241848423728632	0.0280526463759508
227	2 vs. 29	2	0.9983	0.9983	0.0247	1	0.1111	2	0.997084244897959	0.997079102040816	0.0320324897959184	0.98314506122449	0.13334	2	0.00167378038871567	0.00167997748687571	0.00839505607048402	0.0172091595875419	0.019070642667847
228	2 vs. 29	3	0.9797	0.966	0.0632	0.9565	0.3611	3	0.978327836734694	0.963547755102041	0.0622181224489796	0.938534775510204	0.40110987755102	3	0.0162470837193968	0.0272804614226038	0.0217686779856555	0.0527818480087459	0.0383368411702942
229	2 vs. 30	1	0.9994	0.9994	0.0198	1	0	1	0.998942612244898	0.998988244897959	0.0261798367346939	0.973154367346939	0.0477981224489796	1	0.000443190711999786	0.000438776826387494	0.00526656986503144	0.0241848423728632	0.0280526463759508
230	2 vs. 30	2	0.9972	0.9972	0.0324	0.9677	0.1389	2	0.997084244897959	0.997079102040816	0.0320324897959184	0.98314506122449	0.13334	2	0.00167378038871567	0.00167997748687571	0.00839505607048402	0.0172091595875419	0.019070642667847
231	2 vs. 30	3	0.9726	0.9538	0.0733	0.8571	0.4167	3	0.978327836734694	0.963547755102041	0.0622181224489796	0.938534775510204	0.40110987755102	3	0.0162470837193968	0.0272804614226038	0.0217686779856555	0.0527818480087459	0.0383368411702942
232	2 vs. 31	1	0.999	0.9992	0.0257	0.9714	0.0278	1	0.998942612244898	0.998988244897959	0.0261798367346939	0.973154367346939	0.0477981224489796	1	0.000443190711999786	0.000438776826387494	0.00526656986503144	0.0241848423728632	0.0280526463759508
233	2 vs. 31	2	0.9974	0.9973	0.0322	1	0.1111	2	0.997084244897959	0.997079102040816	0.0320324897959184	0.98314506122449	0.13334	2	0.00167378038871567	0.00167997748687571	0.00839505607048402	0.0172091595875419	0.019070642667847
234	2 vs. 31	3	0.9748	0.9563	0.0704	0.9091	0.3889	3	0.978327836734694	0.963547755102041	0.0622181224489796	0.938534775510204	0.40110987755102	3	0.0162470837193968	0.0272804614226038	0.0217686779856555	0.0527818480087459	0.0383368411702942
235	2 vs. 32	1	0.9993	0.9995	0.022	0.9714	0.0278	1	0.998942612244898	0.998988244897959	0.0261798367346939	0.973154367346939	0.0477981224489796	1	0.000443190711999786	0.000438776826387494	0.00526656986503144	0.0241848423728632	0.0280526463759508
236	2 vs. 32	2	0.9964	0.9963	0.0376	1	0.1111	2	0.997084244897959	0.997079102040816	0.0320324897959184	0.98314506122449	0.13334	2	0.00167378038871567	0.00167997748687571	0.00839505607048402	0.0172091595875419	0.019070642667847
237	2 vs. 32	3	0.9907	0.984	0.0429	1	0.3333	3	0.978327836734694	0.963547755102041	0.0622181224489796	0.938534775510204	0.40110987755102	3	0.0162470837193968	0.0272804614226038	0.0217686779856555	0.0527818480087459	0.0383368411702942
238	2 vs. 33	1	0.9991	0.9992	0.0234	0.9091	0.0833	1	0.998942612244898	0.998988244897959	0.0261798367346939	0.973154367346939	0.0477981224489796	1	0.000443190711999786	0.000438776826387494	0.00526656986503144	0.0241848423728632	0.0280526463759508
239	2 vs. 33	2	0.9967	0.9966	0.0343	0.9677	0.1389	2	0.997084244897959	0.997079102040816	0.0320324897959184	0.98314506122449	0.13334	2	0.00167378038871567	0.00167997748687571	0.00839505607048402	0.0172091595875419	0.019070642667847
240	2 vs. 33	3	0.9839	0.9756	0.0564	0.8571	0.4167	3	0.978327836734694	0.963547755102041	0.0622181224489796	0.938534775510204	0.40110987755102	3	0.0162470837193968	0.0272804614226038	0.0217686779856555	0.0527818480087459	0.0383368411702942
241	2 vs. 34	1	0.9994	0.9995	0.0192	0.9714	0.0278	1	0.998942612244898	0.998988244897959	0.0261798367346939	0.973154367346939	0.0477981224489796	1	0.000443190711999786	0.000438776826387494	0.00526656986503144	0.0241848423728632	0.0280526463759508
242	2 vs. 34	2	0.9993	0.9993	0.016	1	0.1111	2	0.997084244897959	0.997079102040816	0.0320324897959184	0.98314506122449	0.13334	2	0.00167378038871567	0.00167997748687571	0.00839505607048402	0.0172091595875419	0.019070642667847
243	2 vs. 34	3	0.9924	0.9874	0.0388	0.9565	0.3611	3	0.978327836734694	0.963547755102041	0.0622181224489796	0.938534775510204	0.40110987755102	3	0.0162470837193968	0.0272804614226038	0.0217686779856555	0.0527818480087459	0.0383368411702942
244	2 vs. 35	1	0.9991	0.9993	0.0252	0.9714	0.0278	1	0.998942612244898	0.998988244897959	0.0261798367346939	0.973154367346939	0.0477981224489796	1	0.000443190711999786	0.000438776826387494	0.00526656986503144	0.0241848423728632	0.0280526463759508
245	2 vs. 35	2	0.9961	0.996	0.0381	0.9677	0.1389	2	0.997084244897959	0.997079102040816	0.0320324897959184	0.98314506122449	0.13334	2	0.00167378038871567	0.00167997748687571	0.00839505607048402	0.0172091595875419	0.019070642667847
246	2 vs. 35	3	0.9887	0.9805	0.0472	0.9565	0.3611	3	0.978327836734694	0.963547755102041	0.0622181224489796	0.938534775510204	0.40110987755102	3	0.0162470837193968	0.0272804614226038	0.0217686779856555	0.0527818480087459	0.0383368411702942
247	2 vs. 36	1	0.9994	0.9996	0.0201	0.9714	0.0278	1	0.998942612244898	0.998988244897959	0.0261798367346939	0.973154367346939	0.0477981224489796	1	0.000443190711999786	0.000438776826387494	0.00526656986503144	0.0241848423728632	0.0280526463759508
248	2 vs. 36	2	0.9969	0.9968	0.0339	1	0.1111	2	0.997084244897959	0.997079102040816	0.0320324897959184	0.98314506122449	0.13334	2	0.00167378038871567	0.00167997748687571	0.00839505607048402	0.0172091595875419	0.019070642667847
249	2 vs. 36	3	0.9925	0.987	0.0403	1	0.3333	3	0.978327836734694	0.963547755102041	0.0622181224489796	0.938534775510204	0.40110987755102	3	0.0162470837193968	0.0272804614226038	0.0217686779856555	0.0527818480087459	0.0383368411702942
250	2 vs. 37	1	0.9986	0.9987	0.03	0.9412	0.0556	1	0.998942612244898	0.998988244897959	0.0261798367346939	0.973154367346939	0.0477981224489796	1	0.000443190711999786	0.000438776826387494	0.00526656986503144	0.0241848423728632	0.0280526463759508
251	2 vs. 37	2	0.9976	0.9975	0.0296	0.9677	0.1389	2	0.997084244897959	0.997079102040816	0.0320324897959184	0.98314506122449	0.13334	2	0.00167378038871567	0.00167997748687571	0.00839505607048402	0.0172091595875419	0.019070642667847
252	2 vs. 37	3	0.978	0.9635	0.066	0.9091	0.3889	3	0.978327836734694	0.963547755102041	0.0622181224489796	0.938534775510204	0.40110987755102	3	0.0162470837193968	0.0272804614226038	0.0217686779856555	0.0527818480087459	0.0383368411702942
253	2 vs. 38	1	0.9989	0.9991	0.0298	0.9714	0.0278	1	0.998942612244898	0.998988244897959	0.0261798367346939	0.973154367346939	0.0477981224489796	1	0.000443190711999786	0.000438776826387494	0.00526656986503144	0.0241848423728632	0.0280526463759508
254	2 vs. 38	2	0.9982	0.9981	0.026	1	0.1111	2	0.997084244897959	0.997079102040816	0.0320324897959184	0.98314506122449	0.13334	2	0.00167378038871567	0.00167997748687571	0.00839505607048402	0.0172091595875419	0.019070642667847
255	2 vs. 38	3	0.9803	0.9661	0.0623	0.8571	0.4167	3	0.978327836734694	0.963547755102041	0.0622181224489796	0.938534775510204	0.40110987755102	3	0.0162470837193968	0.0272804614226038	0.0217686779856555	0.0527818480087459	0.0383368411702942
256	2 vs. 39	1	0.9992	0.9995	0.0235	0.9714	0.0278	1	0.998942612244898	0.998988244897959	0.0261798367346939	0.973154367346939	0.0477981224489796	1	0.000443190711999786	0.000438776826387494	0.00526656986503144	0.0241848423728632	0.0280526463759508
257	2 vs. 39	2	0.9976	0.9976	0.0295	0.9677	0.1389	2	0.997084244897959	0.997079102040816	0.0320324897959184	0.98314506122449	0.13334	2	0.00167378038871567	0.00167997748687571	0.00839505607048402	0.0172091595875419	0.019070642667847
258	2 vs. 39	3	0.9933	0.9889	0.0365	0.9565	0.3611	3	0.978327836734694	0.963547755102041	0.0622181224489796	0.938534775510204	0.40110987755102	3	0.0162470837193968	0.0272804614226038	0.0217686779856555	0.0527818480087459	0.0383368411702942
259	2 vs. 40	1	0.999	0.9991	0.0257	0.9714	0.0278	1	0.998942612244898	0.998988244897959	0.0261798367346939	0.973154367346939	0.0477981224489796	1	0.000443190711999786	0.000438776826387494	0.00526656986503144	0.0241848423728632	0.0280526463759508
260	2 vs. 40	2	0.9983	0.9983	0.0245	1	0.1111	2	0.997084244897959	0.997079102040816	0.0320324897959184	0.98314506122449	0.13334	2	0.00167378038871567	0.00167997748687571	0.00839505607048402	0.0172091595875419	0.019070642667847
261	2 vs. 40	3	0.9816	0.9682	0.0604	0.8571	0.4167	3	0.978327836734694	0.963547755102041	0.0622181224489796	0.938534775510204	0.40110987755102	3	0.0162470837193968	0.0272804614226038	0.0217686779856555	0.0527818480087459	0.0383368411702942
262	2 vs. 41	1	0.9993	0.9994	0.0211	1	0	1	0.998942612244898	0.998988244897959	0.0261798367346939	0.973154367346939	0.0477981224489796	1	0.000443190711999786	0.000438776826387494	0.00526656986503144	0.0241848423728632	0.0280526463759508
263	2 vs. 41	2	0.9969	0.9968	0.0337	0.9677	0.1389	2	0.997084244897959	0.997079102040816	0.0320324897959184	0.98314506122449	0.13334	2	0.00167378038871567	0.00167997748687571	0.00839505607048402	0.0172091595875419	0.019070642667847
264	2 vs. 41	3	0.9948	0.9917	0.0323	1	0.3333	3	0.978327836734694	0.963547755102041	0.0622181224489796	0.938534775510204	0.40110987755102	3	0.0162470837193968	0.0272804614226038	0.0217686779856555	0.0527818480087459	0.0383368411702942
265	2 vs. 42	1	0.999	0.9991	0.0281	1	0	1	0.998942612244898	0.998988244897959	0.0261798367346939	0.973154367346939	0.0477981224489796	1	0.000443190711999786	0.000438776826387494	0.00526656986503144	0.0241848423728632	0.0280526463759508
266	2 vs. 42	2	0.9962	0.996	0.0375	1	0.1111	2	0.997084244897959	0.997079102040816	0.0320324897959184	0.98314506122449	0.13334	2	0.00167378038871567	0.00167997748687571	0.00839505607048402	0.0172091595875419	0.019070642667847
267	2 vs. 42	3	0.9854	0.9748	0.0537	0.9091	0.3889	3	0.978327836734694	0.963547755102041	0.0622181224489796	0.938534775510204	0.40110987755102	3	0.0162470837193968	0.0272804614226038	0.0217686779856555	0.0527818480087459	0.0383368411702942
268	2 vs. 43	1	0.9988	0.999	0.0274	0.9714	0.0278	1	0.998942612244898	0.998988244897959	0.0261798367346939	0.973154367346939	0.0477981224489796	1	0.000443190711999786	0.000438776826387494	0.00526656986503144	0.0241848423728632	0.0280526463759508
269	2 vs. 43	2	0.998	0.9981	0.0267	1	0.1111	2	0.997084244897959	0.997079102040816	0.0320324897959184	0.98314506122449	0.13334	2	0.00167378038871567	0.00167997748687571	0.00839505607048402	0.0172091595875419	0.019070642667847
270	2 vs. 43	3	0.9768	0.9637	0.0676	0.8571	0.4167	3	0.978327836734694	0.963547755102041	0.0622181224489796	0.938534775510204	0.40110987755102	3	0.0162470837193968	0.0272804614226038	0.0217686779856555	0.0527818480087459	0.0383368411702942
271	2 vs. 44	1	0.9993	0.9996	0.0215	0.9714	0.0278	1	0.998942612244898	0.998988244897959	0.0261798367346939	0.973154367346939	0.0477981224489796	1	0.000443190711999786	0.000438776826387494	0.00526656986503144	0.0241848423728632	0.0280526463759508
272	2 vs. 44	2	0.9974	0.9973	0.0308	1	0.1111	2	0.997084244897959	0.997079102040816	0.0320324897959184	0.98314506122449	0.13334	2	0.00167378038871567	0.00167997748687571	0.00839505607048402	0.0172091595875419	0.019070642667847
273	2 vs. 44	3	0.9809	0.967	0.0617	0.9565	0.3611	3	0.978327836734694	0.963547755102041	0.0622181224489796	0.938534775510204	0.40110987755102	3	0.0162470837193968	0.0272804614226038	0.0217686779856555	0.0527818480087459	0.0383368411702942
274	2 vs. 45	1	0.999	0.9992	0.0256	0.9714	0.0278	1	0.998942612244898	0.998988244897959	0.0261798367346939	0.973154367346939	0.0477981224489796	1	0.000443190711999786	0.000438776826387494	0.00526656986503144	0.0241848423728632	0.0280526463759508
275	2 vs. 45	2	0.9974	0.9973	0.0314	1	0.1111	2	0.997084244897959	0.997079102040816	0.0320324897959184	0.98314506122449	0.13334	2	0.00167378038871567	0.00167997748687571	0.00839505607048402	0.0172091595875419	0.019070642667847
276	2 vs. 45	3	0.9912	0.9871	0.0417	0.9565	0.3611	3	0.978327836734694	0.963547755102041	0.0622181224489796	0.938534775510204	0.40110987755102	3	0.0162470837193968	0.0272804614226038	0.0217686779856555	0.0527818480087459	0.0383368411702942
277	2 vs. 46	1	0.9991	0.9993	0.0244	0.9412	0.0556	1	0.998942612244898	0.998988244897959	0.0261798367346939	0.973154367346939	0.0477981224489796	1	0.000443190711999786	0.000438776826387494	0.00526656986503144	0.0241848423728632	0.0280526463759508
278	2 vs. 46	2	0.9982	0.9982	0.0252	0.9677	0.1389	2	0.997084244897959	0.997079102040816	0.0320324897959184	0.98314506122449	0.13334	2	0.00167378038871567	0.00167997748687571	0.00839505607048402	0.0172091595875419	0.019070642667847
279	2 vs. 46	3	0.9856	0.976	0.0534	0.9091	0.3889	3	0.978327836734694	0.963547755102041	0.0622181224489796	0.938534775510204	0.40110987755102	3	0.0162470837193968	0.0272804614226038	0.0217686779856555	0.0527818480087459	0.0383368411702942
280	2 vs. 47	1	0.9993	0.9995	0.0217	0.9714	0.0278	1	0.998942612244898	0.998988244897959	0.0261798367346939	0.973154367346939	0.0477981224489796	1	0.000443190711999786	0.000438776826387494	0.00526656986503144	0.0241848423728632	0.0280526463759508
281	2 vs. 47	2	0.9984	0.9983	0.024	0.9677	0.1389	2	0.997084244897959	0.997079102040816	0.0320324897959184	0.98314506122449	0.13334	2	0.00167378038871567	0.00167997748687571	0.00839505607048402	0.0172091595875419	0.019070642667847
282	2 vs. 47	3	0.9914	0.9857	0.0413	0.9565	0.3611	3	0.978327836734694	0.963547755102041	0.0622181224489796	0.938534775510204	0.40110987755102	3	0.0162470837193968	0.0272804614226038	0.0217686779856555	0.0527818480087459	0.0383368411702942
283	2 vs. 48	1	0.9993	0.9994	0.021	0.9714	0.0278	1	0.998942612244898	0.998988244897959	0.0261798367346939	0.973154367346939	0.0477981224489796	1	0.000443190711999786	0.000438776826387494	0.00526656986503144	0.0241848423728632	0.0280526463759508
284	2 vs. 48	2	0.9977	0.9976	0.0312	1	0.1111	2	0.997084244897959	0.997079102040816	0.0320324897959184	0.98314506122449	0.13334	2	0.00167378038871567	0.00167997748687571	0.00839505607048402	0.0172091595875419	0.019070642667847
285	2 vs. 48	3	0.9955	0.9923	0.0302	0.9565	0.3611	3	0.978327836734694	0.963547755102041	0.0622181224489796	0.938534775510204	0.40110987755102	3	0.0162470837193968	0.0272804614226038	0.0217686779856555	0.0527818480087459	0.0383368411702942
286	2 vs. 49	1	0.9992	0.9993	0.0231	1	0	1	0.998942612244898	0.998988244897959	0.0261798367346939	0.973154367346939	0.0477981224489796	1	0.000443190711999786	0.000438776826387494	0.00526656986503144	0.0241848423728632	0.0280526463759508
287	2 vs. 49	2	0.9988	0.9988	0.0227	0.9677	0.1389	2	0.997084244897959	0.997079102040816	0.0320324897959184	0.98314506122449	0.13334	2	0.00167378038871567	0.00167997748687571	0.00839505607048402	0.0172091595875419	0.019070642667847
288	2 vs. 49	3	0.9837	0.9718	0.0585	0.9565	0.3611	3	0.978327836734694	0.963547755102041	0.0622181224489796	0.938534775510204	0.40110987755102	3	0.0162470837193968	0.0272804614226038	0.0217686779856555	0.0527818480087459	0.0383368411702942
289	2 vs. 50	1	0.9985	0.9985	0.0305	0.9091	0.0833	1	0.998942612244898	0.998988244897959	0.0261798367346939	0.973154367346939	0.0477981224489796	1	0.000443190711999786	0.000438776826387494	0.00526656986503144	0.0241848423728632	0.0280526463759508
290	2 vs. 50	2	0.9973	0.9972	0.0311	1	0.1111	2	0.997084244897959	0.997079102040816	0.0320324897959184	0.98314506122449	0.13334	2	0.00167378038871567	0.00167997748687571	0.00839505607048402	0.0172091595875419	0.019070642667847
291	2 vs. 50	3	0.9827	0.9719	0.0585	0.9091	0.3889	3	0.978327836734694	0.963547755102041	0.0622181224489796	0.938534775510204	0.40110987755102	3	0.0162470837193968	0.0272804614226038	0.0217686779856555	0.0527818480087459	0.0383368411702942
292	3 vs. 4	1	0.9989	0.999	0.0268	0.9714	0.0278	1	0.998942612244898	0.998988244897959	0.0261798367346939	0.973154367346939	0.0477981224489796	1	0.000443190711999786	0.000438776826387494	0.00526656986503144	0.0241848423728632	0.0280526463759508
293	3 vs. 4	2	0.9984	0.9983	0.0249	0.9677	0.1389	2	0.997084244897959	0.997079102040816	0.0320324897959184	0.98314506122449	0.13334	2	0.00167378038871567	0.00167997748687571	0.00839505607048402	0.0172091595875419	0.019070642667847
294	3 vs. 4	3	0.9937	0.9901	0.0362	0.9565	0.3611	3	0.978327836734694	0.963547755102041	0.0622181224489796	0.938534775510204	0.40110987755102	3	0.0162470837193968	0.0272804614226038	0.0217686779856555	0.0527818480087459	0.0383368411702942
295	3 vs. 5	1	0.9986	0.9987	0.0298	1	0.0556	1	0.998942612244898	0.998988244897959	0.0261798367346939	0.973154367346939	0.0477981224489796	1	0.000443190711999786	0.000438776826387494	0.00526656986503144	0.0241848423728632	0.0280526463759508
296	3 vs. 5	2	0.9974	0.9973	0.0304	0.9677	0.1389	2	0.997084244897959	0.997079102040816	0.0320324897959184	0.98314506122449	0.13334	2	0.00167378038871567	0.00167997748687571	0.00839505607048402	0.0172091595875419	0.019070642667847
297	3 vs. 5	3	0.987	0.9825	0.051	0.9524	0.4167	3	0.978327836734694	0.963547755102041	0.0622181224489796	0.938534775510204	0.40110987755102	3	0.0162470837193968	0.0272804614226038	0.0217686779856555	0.0527818480087459	0.0383368411702942
298	3 vs. 6	1	0.9995	0.9996	0.0197	1	0.0556	1	0.998942612244898	0.998988244897959	0.0261798367346939	0.973154367346939	0.0477981224489796	1	0.000443190711999786	0.000438776826387494	0.00526656986503144	0.0241848423728632	0.0280526463759508
299	3 vs. 6	2	0.9961	0.9959	0.0379	0.9677	0.1389	2	0.997084244897959	0.997079102040816	0.0320324897959184	0.98314506122449	0.13334	2	0.00167378038871567	0.00167997748687571	0.00839505607048402	0.0172091595875419	0.019070642667847
300	3 vs. 6	3	0.9803	0.967	0.0626	0.9565	0.3611	3	0.978327836734694	0.963547755102041	0.0622181224489796	0.938534775510204	0.40110987755102	3	0.0162470837193968	0.0272804614226038	0.0217686779856555	0.0527818480087459	0.0383368411702942
301	3 vs. 7	1	0.9995	0.9996	0.0179	1	0.0556	1	0.998942612244898	0.998988244897959	0.0261798367346939	0.973154367346939	0.0477981224489796	1	0.000443190711999786	0.000438776826387494	0.00526656986503144	0.0241848423728632	0.0280526463759508
302	3 vs. 7	2	0.9982	0.9981	0.0252	1	0.1667	2	0.997084244897959	0.997079102040816	0.0320324897959184	0.98314506122449	0.13334	2	0.00167378038871567	0.00167997748687571	0.00839505607048402	0.0172091595875419	0.019070642667847
303	3 vs. 7	3	0.9921	0.9863	0.0409	1	0.3889	3	0.978327836734694	0.963547755102041	0.0622181224489796	0.938534775510204	0.40110987755102	3	0.0162470837193968	0.0272804614226038	0.0217686779856555	0.0527818480087459	0.0383368411702942
304	3 vs. 8	1	0.9985	0.9985	0.0304	1	0.0556	1	0.998942612244898	0.998988244897959	0.0261798367346939	0.973154367346939	0.0477981224489796	1	0.000443190711999786	0.000438776826387494	0.00526656986503144	0.0241848423728632	0.0280526463759508
305	3 vs. 8	2	0.9968	0.9974	0.0337	1	0.1667	2	0.997084244897959	0.997079102040816	0.0320324897959184	0.98314506122449	0.13334	2	0.00167378038871567	0.00167997748687571	0.00839505607048402	0.0172091595875419	0.019070642667847
306	3 vs. 8	3	0.9457	0.9024	0.104	0.8182	0.3889	3	0.978327836734694	0.963547755102041	0.0622181224489796	0.938534775510204	0.40110987755102	3	0.0162470837193968	0.0272804614226038	0.0217686779856555	0.0527818480087459	0.0383368411702942
307	3 vs. 9	1	0.9987	0.9987	0.0283	0.9714	0.0278	1	0.998942612244898	0.998988244897959	0.0261798367346939	0.973154367346939	0.0477981224489796	1	0.000443190711999786	0.000438776826387494	0.00526656986503144	0.0241848423728632	0.0280526463759508
308	3 vs. 9	2	0.9989	0.9989	0.0202	0.9677	0.1389	2	0.997084244897959	0.997079102040816	0.0320324897959184	0.98314506122449	0.13334	2	0.00167378038871567	0.00167997748687571	0.00839505607048402	0.0172091595875419	0.019070642667847
309	3 vs. 9	3	0.9897	0.9823	0.0462	1	0.3889	3	0.978327836734694	0.963547755102041	0.0622181224489796	0.938534775510204	0.40110987755102	3	0.0162470837193968	0.0272804614226038	0.0217686779856555	0.0527818480087459	0.0383368411702942
310	3 vs. 10	1	0.9991	0.9991	0.0245	0.9697	0.0833	1	0.998942612244898	0.998988244897959	0.0261798367346939	0.973154367346939	0.0477981224489796	1	0.000443190711999786	0.000438776826387494	0.00526656986503144	0.0241848423728632	0.0280526463759508
311	3 vs. 10	2	0.9991	0.999	0.0193	1	0.1667	2	0.997084244897959	0.997079102040816	0.0320324897959184	0.98314506122449	0.13334	2	0.00167378038871567	0.00167997748687571	0.00839505607048402	0.0172091595875419	0.019070642667847
312	3 vs. 10	3	0.9806	0.9662	0.0627	0.9524	0.4167	3	0.978327836734694	0.963547755102041	0.0622181224489796	0.938534775510204	0.40110987755102	3	0.0162470837193968	0.0272804614226038	0.0217686779856555	0.0527818480087459	0.0383368411702942
313	3 vs. 11	1	0.9989	0.9989	0.0273	1	0.0556	1	0.998942612244898	0.998988244897959	0.0261798367346939	0.973154367346939	0.0477981224489796	1	0.000443190711999786	0.000438776826387494	0.00526656986503144	0.0241848423728632	0.0280526463759508
314	3 vs. 11	2	0.9975	0.9975	0.0301	1	0.1667	2	0.997084244897959	0.997079102040816	0.0320324897959184	0.98314506122449	0.13334	2	0.00167378038871567	0.00167997748687571	0.00839505607048402	0.0172091595875419	0.019070642667847
315	3 vs. 11	3	0.9624	0.9398	0.086	0.9565	0.3611	3	0.978327836734694	0.963547755102041	0.0622181224489796	0.938534775510204	0.40110987755102	3	0.0162470837193968	0.0272804614226038	0.0217686779856555	0.0527818480087459	0.0383368411702942
316	3 vs. 12	1	0.9991	0.9991	0.0251	0.9714	0.0278	1	0.998942612244898	0.998988244897959	0.0261798367346939	0.973154367346939	0.0477981224489796	1	0.000443190711999786	0.000438776826387494	0.00526656986503144	0.0241848423728632	0.0280526463759508
317	3 vs. 12	2	0.9987	0.9986	0.0219	1	0.1667	2	0.997084244897959	0.997079102040816	0.0320324897959184	0.98314506122449	0.13334	2	0.00167378038871567	0.00167997748687571	0.00839505607048402	0.0172091595875419	0.019070642667847
318	3 vs. 12	3	0.9755	0.9568	0.0696	0.9	0.4444	3	0.978327836734694	0.963547755102041	0.0622181224489796	0.938534775510204	0.40110987755102	3	0.0162470837193968	0.0272804614226038	0.0217686779856555	0.0527818480087459	0.0383368411702942
319	3 vs. 13	1	0.9979	0.9978	0.0376	0.9412	0.0556	1	0.998942612244898	0.998988244897959	0.0261798367346939	0.973154367346939	0.0477981224489796	1	0.000443190711999786	0.000438776826387494	0.00526656986503144	0.0241848423728632	0.0280526463759508
320	3 vs. 13	2	0.9977	0.9977	0.0297	0.9677	0.1389	2	0.997084244897959	0.997079102040816	0.0320324897959184	0.98314506122449	0.13334	2	0.00167378038871567	0.00167997748687571	0.00839505607048402	0.0172091595875419	0.019070642667847
321	3 vs. 13	3	0.9868	0.9772	0.0518	0.9524	0.4167	3	0.978327836734694	0.963547755102041	0.0622181224489796	0.938534775510204	0.40110987755102	3	0.0162470837193968	0.0272804614226038	0.0217686779856555	0.0527818480087459	0.0383368411702942
322	3 vs. 14	1	0.9995	0.9995	0.0185	0.9714	0.0278	1	0.998942612244898	0.998988244897959	0.0261798367346939	0.973154367346939	0.0477981224489796	1	0.000443190711999786	0.000438776826387494	0.00526656986503144	0.0241848423728632	0.0280526463759508
323	3 vs. 14	2	0.9988	0.9988	0.0208	0.9677	0.1389	2	0.997084244897959	0.997079102040816	0.0320324897959184	0.98314506122449	0.13334	2	0.00167378038871567	0.00167997748687571	0.00839505607048402	0.0172091595875419	0.019070642667847
324	3 vs. 14	3	0.9929	0.9875	0.0378	0.9565	0.3611	3	0.978327836734694	0.963547755102041	0.0622181224489796	0.938534775510204	0.40110987755102	3	0.0162470837193968	0.0272804614226038	0.0217686779856555	0.0527818480087459	0.0383368411702942
325	3 vs. 15	1	0.9989	0.999	0.0258	0.9412	0.0556	1	0.998942612244898	0.998988244897959	0.0261798367346939	0.973154367346939	0.0477981224489796	1	0.000443190711999786	0.000438776826387494	0.00526656986503144	0.0241848423728632	0.0280526463759508
326	3 vs. 15	2	0.997	0.9974	0.0325	1	0.1667	2	0.997084244897959	0.997079102040816	0.0320324897959184	0.98314506122449	0.13334	2	0.00167378038871567	0.00167997748687571	0.00839505607048402	0.0172091595875419	0.019070642667847
327	3 vs. 15	3	0.9827	0.9714	0.0589	1	0.3889	3	0.978327836734694	0.963547755102041	0.0622181224489796	0.938534775510204	0.40110987755102	3	0.0162470837193968	0.0272804614226038	0.0217686779856555	0.0527818480087459	0.0383368411702942
328	3 vs. 16	1	0.9992	0.9992	0.0227	1	0.0556	1	0.998942612244898	0.998988244897959	0.0261798367346939	0.973154367346939	0.0477981224489796	1	0.000443190711999786	0.000438776826387494	0.00526656986503144	0.0241848423728632	0.0280526463759508
329	3 vs. 16	2	0.9985	0.9987	0.024	0.9677	0.1389	2	0.997084244897959	0.997079102040816	0.0320324897959184	0.98314506122449	0.13334	2	0.00167378038871567	0.00167997748687571	0.00839505607048402	0.0172091595875419	0.019070642667847
330	3 vs. 16	3	0.9861	0.9781	0.0526	0.9565	0.3611	3	0.978327836734694	0.963547755102041	0.0622181224489796	0.938534775510204	0.40110987755102	3	0.0162470837193968	0.0272804614226038	0.0217686779856555	0.0527818480087459	0.0383368411702942
331	3 vs. 17	1	0.9991	0.9991	0.0262	1	0.0556	1	0.998942612244898	0.998988244897959	0.0261798367346939	0.973154367346939	0.0477981224489796	1	0.000443190711999786	0.000438776826387494	0.00526656986503144	0.0241848423728632	0.0280526463759508
332	3 vs. 17	2	0.9955	0.9953	0.0399	0.9677	0.1389	2	0.997084244897959	0.997079102040816	0.0320324897959184	0.98314506122449	0.13334	2	0.00167378038871567	0.00167997748687571	0.00839505607048402	0.0172091595875419	0.019070642667847
333	3 vs. 17	3	0.9847	0.9747	0.0551	1	0.3889	3	0.978327836734694	0.963547755102041	0.0622181224489796	0.938534775510204	0.40110987755102	3	0.0162470837193968	0.0272804614226038	0.0217686779856555	0.0527818480087459	0.0383368411702942
334	3 vs. 18	1	0.9992	0.9994	0.0258	1	0.0556	1	0.998942612244898	0.998988244897959	0.0261798367346939	0.973154367346939	0.0477981224489796	1	0.000443190711999786	0.000438776826387494	0.00526656986503144	0.0241848423728632	0.0280526463759508
335	3 vs. 18	2	0.9946	0.9947	0.0438	1	0.1667	2	0.997084244897959	0.997079102040816	0.0320324897959184	0.98314506122449	0.13334	2	0.00167378038871567	0.00167997748687571	0.00839505607048402	0.0172091595875419	0.019070642667847
336	3 vs. 18	3	0.9889	0.9832	0.0479	1	0.3889	3	0.978327836734694	0.963547755102041	0.0622181224489796	0.938534775510204	0.40110987755102	3	0.0162470837193968	0.0272804614226038	0.0217686779856555	0.0527818480087459	0.0383368411702942
337	3 vs. 19	1	0.9986	0.9987	0.0307	1	0.0556	1	0.998942612244898	0.998988244897959	0.0261798367346939	0.973154367346939	0.0477981224489796	1	0.000443190711999786	0.000438776826387494	0.00526656986503144	0.0241848423728632	0.0280526463759508
338	3 vs. 19	2	0.9973	0.9974	0.0308	0.9677	0.1389	2	0.997084244897959	0.997079102040816	0.0320324897959184	0.98314506122449	0.13334	2	0.00167378038871567	0.00167997748687571	0.00839505607048402	0.0172091595875419	0.019070642667847
339	3 vs. 19	3	0.9677	0.9558	0.0823	0.9167	0.3333	3	0.978327836734694	0.963547755102041	0.0622181224489796	0.938534775510204	0.40110987755102	3	0.0162470837193968	0.0272804614226038	0.0217686779856555	0.0527818480087459	0.0383368411702942
340	3 vs. 20	1	0.9993	0.9995	0.0243	0.9714	0.0278	1	0.998942612244898	0.998988244897959	0.0261798367346939	0.973154367346939	0.0477981224489796	1	0.000443190711999786	0.000438776826387494	0.00526656986503144	0.0241848423728632	0.0280526463759508
341	3 vs. 20	2	0.9968	0.9969	0.0337	0.9677	0.1389	2	0.997084244897959	0.997079102040816	0.0320324897959184	0.98314506122449	0.13334	2	0.00167378038871567	0.00167997748687571	0.00839505607048402	0.0172091595875419	0.019070642667847
342	3 vs. 20	3	0.9814	0.9693	0.0612	0.9565	0.3611	3	0.978327836734694	0.963547755102041	0.0622181224489796	0.938534775510204	0.40110987755102	3	0.0162470837193968	0.0272804614226038	0.0217686779856555	0.0527818480087459	0.0383368411702942
343	3 vs. 21	1	0.9993	0.9993	0.0241	0.9714	0.0278	1	0.998942612244898	0.998988244897959	0.0261798367346939	0.973154367346939	0.0477981224489796	1	0.000443190711999786	0.000438776826387494	0.00526656986503144	0.0241848423728632	0.0280526463759508
344	3 vs. 21	2	0.9985	0.9984	0.0251	0.9677	0.1389	2	0.997084244897959	0.997079102040816	0.0320324897959184	0.98314506122449	0.13334	2	0.00167378038871567	0.00167997748687571	0.00839505607048402	0.0172091595875419	0.019070642667847
345	3 vs. 21	3	0.9861	0.9769	0.0538	1	0.3889	3	0.978327836734694	0.963547755102041	0.0622181224489796	0.938534775510204	0.40110987755102	3	0.0162470837193968	0.0272804614226038	0.0217686779856555	0.0527818480087459	0.0383368411702942
346	3 vs. 22	1	0.9991	0.9991	0.0243	1	0.0556	1	0.998942612244898	0.998988244897959	0.0261798367346939	0.973154367346939	0.0477981224489796	1	0.000443190711999786	0.000438776826387494	0.00526656986503144	0.0241848423728632	0.0280526463759508
347	3 vs. 22	2	0.9991	0.9991	0.0184	0.9677	0.1389	2	0.997084244897959	0.997079102040816	0.0320324897959184	0.98314506122449	0.13334	2	0.00167378038871567	0.00167997748687571	0.00839505607048402	0.0172091595875419	0.019070642667847
348	3 vs. 22	3	0.9891	0.9807	0.0467	1	0.3889	3	0.978327836734694	0.963547755102041	0.0622181224489796	0.938534775510204	0.40110987755102	3	0.0162470837193968	0.0272804614226038	0.0217686779856555	0.0527818480087459	0.0383368411702942
349	3 vs. 23	1	0.9993	0.9993	0.023	1	0.0556	1	0.998942612244898	0.998988244897959	0.0261798367346939	0.973154367346939	0.0477981224489796	1	0.000443190711999786	0.000438776826387494	0.00526656986503144	0.0241848423728632	0.0280526463759508
350	3 vs. 23	2	0.9985	0.9985	0.0242	0.9677	0.1389	2	0.997084244897959	0.997079102040816	0.0320324897959184	0.98314506122449	0.13334	2	0.00167378038871567	0.00167997748687571	0.00839505607048402	0.0172091595875419	0.019070642667847
351	3 vs. 23	3	0.987	0.9815	0.0511	1	0.3889	3	0.978327836734694	0.963547755102041	0.0622181224489796	0.938534775510204	0.40110987755102	3	0.0162470837193968	0.0272804614226038	0.0217686779856555	0.0527818480087459	0.0383368411702942
352	3 vs. 24	1	0.9991	0.9991	0.0251	0.9714	0.0278	1	0.998942612244898	0.998988244897959	0.0261798367346939	0.973154367346939	0.0477981224489796	1	0.000443190711999786	0.000438776826387494	0.00526656986503144	0.0241848423728632	0.0280526463759508
353	3 vs. 24	2	0.9971	0.9969	0.0325	1	0.1667	2	0.997084244897959	0.997079102040816	0.0320324897959184	0.98314506122449	0.13334	2	0.00167378038871567	0.00167997748687571	0.00839505607048402	0.0172091595875419	0.019070642667847
354	3 vs. 24	3	0.9879	0.9788	0.0505	1	0.3889	3	0.978327836734694	0.963547755102041	0.0622181224489796	0.938534775510204	0.40110987755102	3	0.0162470837193968	0.0272804614226038	0.0217686779856555	0.0527818480087459	0.0383368411702942
355	3 vs. 25	1	0.9993	0.9994	0.0206	0.9714	0.0278	1	0.998942612244898	0.998988244897959	0.0261798367346939	0.973154367346939	0.0477981224489796	1	0.000443190711999786	0.000438776826387494	0.00526656986503144	0.0241848423728632	0.0280526463759508
356	3 vs. 25	2	0.9971	0.997	0.0319	1	0.1667	2	0.997084244897959	0.997079102040816	0.0320324897959184	0.98314506122449	0.13334	2	0.00167378038871567	0.00167997748687571	0.00839505607048402	0.0172091595875419	0.019070642667847
357	3 vs. 25	3	0.9907	0.9855	0.0455	1	0.3889	3	0.978327836734694	0.963547755102041	0.0622181224489796	0.938534775510204	0.40110987755102	3	0.0162470837193968	0.0272804614226038	0.0217686779856555	0.0527818480087459	0.0383368411702942
358	3 vs. 26	1	0.9989	0.9989	0.0268	0.9714	0.0278	1	0.998942612244898	0.998988244897959	0.0261798367346939	0.973154367346939	0.0477981224489796	1	0.000443190711999786	0.000438776826387494	0.00526656986503144	0.0241848423728632	0.0280526463759508
359	3 vs. 26	2	0.9984	0.9984	0.0247	1	0.1667	2	0.997084244897959	0.997079102040816	0.0320324897959184	0.98314506122449	0.13334	2	0.00167378038871567	0.00167997748687571	0.00839505607048402	0.0172091595875419	0.019070642667847
360	3 vs. 26	3	0.9876	0.9794	0.0514	1	0.3889	3	0.978327836734694	0.963547755102041	0.0622181224489796	0.938534775510204	0.40110987755102	3	0.0162470837193968	0.0272804614226038	0.0217686779856555	0.0527818480087459	0.0383368411702942
361	3 vs. 27	1	0.9988	0.9988	0.0276	0.9697	0.0833	1	0.998942612244898	0.998988244897959	0.0261798367346939	0.973154367346939	0.0477981224489796	1	0.000443190711999786	0.000438776826387494	0.00526656986503144	0.0241848423728632	0.0280526463759508
362	3 vs. 27	2	0.998	0.9984	0.0273	0.9677	0.1389	2	0.997084244897959	0.997079102040816	0.0320324897959184	0.98314506122449	0.13334	2	0.00167378038871567	0.00167997748687571	0.00839505607048402	0.0172091595875419	0.019070642667847
363	3 vs. 27	3	0.9639	0.9422	0.0844	0.8	0.4444	3	0.978327836734694	0.963547755102041	0.0622181224489796	0.938534775510204	0.40110987755102	3	0.0162470837193968	0.0272804614226038	0.0217686779856555	0.0527818480087459	0.0383368411702942
364	3 vs. 28	1	0.9992	0.9992	0.0234	0.9714	0.0278	1	0.998942612244898	0.998988244897959	0.0261798367346939	0.973154367346939	0.0477981224489796	1	0.000443190711999786	0.000438776826387494	0.00526656986503144	0.0241848423728632	0.0280526463759508
365	3 vs. 28	2	0.9977	0.9981	0.0287	0.9677	0.1389	2	0.997084244897959	0.997079102040816	0.0320324897959184	0.98314506122449	0.13334	2	0.00167378038871567	0.00167997748687571	0.00839505607048402	0.0172091595875419	0.019070642667847
366	3 vs. 28	3	0.9922	0.9878	0.0398	0.9524	0.4167	3	0.978327836734694	0.963547755102041	0.0622181224489796	0.938534775510204	0.40110987755102	3	0.0162470837193968	0.0272804614226038	0.0217686779856555	0.0527818480087459	0.0383368411702942
367	3 vs. 29	1	0.999	0.9992	0.0245	1	0.0556	1	0.998942612244898	0.998988244897959	0.0261798367346939	0.973154367346939	0.0477981224489796	1	0.000443190711999786	0.000438776826387494	0.00526656986503144	0.0241848423728632	0.0280526463759508
368	3 vs. 29	2	0.9977	0.9978	0.0287	0.9677	0.1389	2	0.997084244897959	0.997079102040816	0.0320324897959184	0.98314506122449	0.13334	2	0.00167378038871567	0.00167997748687571	0.00839505607048402	0.0172091595875419	0.019070642667847
369	3 vs. 29	3	0.9748	0.9579	0.0706	1	0.3889	3	0.978327836734694	0.963547755102041	0.0622181224489796	0.938534775510204	0.40110987755102	3	0.0162470837193968	0.0272804614226038	0.0217686779856555	0.0527818480087459	0.0383368411702942
370	3 vs. 30	1	0.9991	0.9991	0.0251	0.9714	0.0278	1	0.998942612244898	0.998988244897959	0.0261798367346939	0.973154367346939	0.0477981224489796	1	0.000443190711999786	0.000438776826387494	0.00526656986503144	0.0241848423728632	0.0280526463759508
371	3 vs. 30	2	0.9968	0.9968	0.0339	1	0.1667	2	0.997084244897959	0.997079102040816	0.0320324897959184	0.98314506122449	0.13334	2	0.00167378038871567	0.00167997748687571	0.00839505607048402	0.0172091595875419	0.019070642667847
372	3 vs. 30	3	0.9766	0.9594	0.068	0.9	0.4444	3	0.978327836734694	0.963547755102041	0.0622181224489796	0.938534775510204	0.40110987755102	3	0.0162470837193968	0.0272804614226038	0.0217686779856555	0.0527818480087459	0.0383368411702942
373	3 vs. 31	1	0.9983	0.9983	0.0343	0.9412	0.0556	1	0.998942612244898	0.998988244897959	0.0261798367346939	0.973154367346939	0.0477981224489796	1	0.000443190711999786	0.000438776826387494	0.00526656986503144	0.0241848423728632	0.0280526463759508
374	3 vs. 31	2	0.9973	0.9971	0.0319	0.9677	0.1389	2	0.997084244897959	0.997079102040816	0.0320324897959184	0.98314506122449	0.13334	2	0.00167378038871567	0.00167997748687571	0.00839505607048402	0.0172091595875419	0.019070642667847
375	3 vs. 31	3	0.981	0.9664	0.0614	0.9524	0.4167	3	0.978327836734694	0.963547755102041	0.0622181224489796	0.938534775510204	0.40110987755102	3	0.0162470837193968	0.0272804614226038	0.0217686779856555	0.0527818480087459	0.0383368411702942
376	3 vs. 32	1	0.9991	0.9992	0.0231	1	0.0556	1	0.998942612244898	0.998988244897959	0.0261798367346939	0.973154367346939	0.0477981224489796	1	0.000443190711999786	0.000438776826387494	0.00526656986503144	0.0241848423728632	0.0280526463759508
377	3 vs. 32	2	0.9973	0.9972	0.0339	0.9677	0.1389	2	0.997084244897959	0.997079102040816	0.0320324897959184	0.98314506122449	0.13334	2	0.00167378038871567	0.00167997748687571	0.00839505607048402	0.0172091595875419	0.019070642667847
378	3 vs. 32	3	0.9911	0.9845	0.0421	0.9565	0.3611	3	0.978327836734694	0.963547755102041	0.0622181224489796	0.938534775510204	0.40110987755102	3	0.0162470837193968	0.0272804614226038	0.0217686779856555	0.0527818480087459	0.0383368411702942
379	3 vs. 33	1	0.9984	0.9984	0.032	0.9375	0.1111	1	0.998942612244898	0.998988244897959	0.0261798367346939	0.973154367346939	0.0477981224489796	1	0.000443190711999786	0.000438776826387494	0.00526656986503144	0.0241848423728632	0.0280526463759508
380	3 vs. 33	2	0.9948	0.9946	0.043	0.9333	0.1667	2	0.997084244897959	0.997079102040816	0.0320324897959184	0.98314506122449	0.13334	2	0.00167378038871567	0.00167997748687571	0.00839505607048402	0.0172091595875419	0.019070642667847
381	3 vs. 33	3	0.9887	0.9828	0.0474	0.9	0.4444	3	0.978327836734694	0.963547755102041	0.0622181224489796	0.938534775510204	0.40110987755102	3	0.0162470837193968	0.0272804614226038	0.0217686779856555	0.0527818480087459	0.0383368411702942
382	3 vs. 34	1	0.9996	0.9996	0.0164	1	0.0556	1	0.998942612244898	0.998988244897959	0.0261798367346939	0.973154367346939	0.0477981224489796	1	0.000443190711999786	0.000438776826387494	0.00526656986503144	0.0241848423728632	0.0280526463759508
383	3 vs. 34	2	0.9983	0.9984	0.0246	0.9677	0.1389	2	0.997084244897959	0.997079102040816	0.0320324897959184	0.98314506122449	0.13334	2	0.00167378038871567	0.00167997748687571	0.00839505607048402	0.0172091595875419	0.019070642667847
384	3 vs. 34	3	0.9943	0.9901	0.0339	1	0.3889	3	0.978327836734694	0.963547755102041	0.0622181224489796	0.938534775510204	0.40110987755102	3	0.0162470837193968	0.0272804614226038	0.0217686779856555	0.0527818480087459	0.0383368411702942
385	3 vs. 35	1	0.9991	0.9992	0.0232	1	0.0556	1	0.998942612244898	0.998988244897959	0.0261798367346939	0.973154367346939	0.0477981224489796	1	0.000443190711999786	0.000438776826387494	0.00526656986503144	0.0241848423728632	0.0280526463759508
386	3 vs. 35	2	0.9969	0.9969	0.0345	1	0.1667	2	0.997084244897959	0.997079102040816	0.0320324897959184	0.98314506122449	0.13334	2	0.00167378038871567	0.00167997748687571	0.00839505607048402	0.0172091595875419	0.019070642667847
387	3 vs. 35	3	0.992	0.986	0.0399	1	0.3889	3	0.978327836734694	0.963547755102041	0.0622181224489796	0.938534775510204	0.40110987755102	3	0.0162470837193968	0.0272804614226038	0.0217686779856555	0.0527818480087459	0.0383368411702942
388	3 vs. 36	1	0.999	0.999	0.0256	1	0.0556	1	0.998942612244898	0.998988244897959	0.0261798367346939	0.973154367346939	0.0477981224489796	1	0.000443190711999786	0.000438776826387494	0.00526656986503144	0.0241848423728632	0.0280526463759508
389	3 vs. 36	2	0.998	0.9981	0.0278	0.9677	0.1389	2	0.997084244897959	0.997079102040816	0.0320324897959184	0.98314506122449	0.13334	2	0.00167378038871567	0.00167997748687571	0.00839505607048402	0.0172091595875419	0.019070642667847
390	3 vs. 36	3	0.9898	0.9821	0.0466	0.9565	0.3611	3	0.978327836734694	0.963547755102041	0.0622181224489796	0.938534775510204	0.40110987755102	3	0.0162470837193968	0.0272804614226038	0.0217686779856555	0.0527818480087459	0.0383368411702942
391	3 vs. 37	1	0.9988	0.9988	0.0281	0.9697	0.0833	1	0.998942612244898	0.998988244897959	0.0261798367346939	0.973154367346939	0.0477981224489796	1	0.000443190711999786	0.000438776826387494	0.00526656986503144	0.0241848423728632	0.0280526463759508
392	3 vs. 37	2	0.9974	0.9973	0.0306	1	0.1667	2	0.997084244897959	0.997079102040816	0.0320324897959184	0.98314506122449	0.13334	2	0.00167378038871567	0.00167997748687571	0.00839505607048402	0.0172091595875419	0.019070642667847
393	3 vs. 37	3	0.9781	0.962	0.066	0.9524	0.4167	3	0.978327836734694	0.963547755102041	0.0622181224489796	0.938534775510204	0.40110987755102	3	0.0162470837193968	0.0272804614226038	0.0217686779856555	0.0527818480087459	0.0383368411702942
394	3 vs. 38	1	0.9991	0.9992	0.0301	1	0.0556	1	0.998942612244898	0.998988244897959	0.0261798367346939	0.973154367346939	0.0477981224489796	1	0.000443190711999786	0.000438776826387494	0.00526656986503144	0.0241848423728632	0.0280526463759508
395	3 vs. 38	2	0.9972	0.997	0.0318	0.9677	0.1389	2	0.997084244897959	0.997079102040816	0.0320324897959184	0.98314506122449	0.13334	2	0.00167378038871567	0.00167997748687571	0.00839505607048402	0.0172091595875419	0.019070642667847
396	3 vs. 38	3	0.9798	0.9643	0.0633	0.9	0.4444	3	0.978327836734694	0.963547755102041	0.0622181224489796	0.938534775510204	0.40110987755102	3	0.0162470837193968	0.0272804614226038	0.0217686779856555	0.0527818480087459	0.0383368411702942
397	3 vs. 39	1	0.9992	0.9992	0.0229	1	0.0556	1	0.998942612244898	0.998988244897959	0.0261798367346939	0.973154367346939	0.0477981224489796	1	0.000443190711999786	0.000438776826387494	0.00526656986503144	0.0241848423728632	0.0280526463759508
398	3 vs. 39	2	0.998	0.9981	0.0264	1	0.1667	2	0.997084244897959	0.997079102040816	0.0320324897959184	0.98314506122449	0.13334	2	0.00167378038871567	0.00167997748687571	0.00839505607048402	0.0172091595875419	0.019070642667847
399	3 vs. 39	3	0.9954	0.9921	0.0304	1	0.3889	3	0.978327836734694	0.963547755102041	0.0622181224489796	0.938534775510204	0.40110987755102	3	0.0162470837193968	0.0272804614226038	0.0217686779856555	0.0527818480087459	0.0383368411702942
400	3 vs. 40	1	0.9992	0.9992	0.0232	1	0.0556	1	0.998942612244898	0.998988244897959	0.0261798367346939	0.973154367346939	0.0477981224489796	1	0.000443190711999786	0.000438776826387494	0.00526656986503144	0.0241848423728632	0.0280526463759508
401	3 vs. 40	2	0.9979	0.9979	0.0275	0.9677	0.1389	2	0.997084244897959	0.997079102040816	0.0320324897959184	0.98314506122449	0.13334	2	0.00167378038871567	0.00167997748687571	0.00839505607048402	0.0172091595875419	0.019070642667847
402	3 vs. 40	3	0.9804	0.9653	0.0626	0.9	0.4444	3	0.978327836734694	0.963547755102041	0.0622181224489796	0.938534775510204	0.40110987755102	3	0.0162470837193968	0.0272804614226038	0.0217686779856555	0.0527818480087459	0.0383368411702942
403	3 vs. 41	1	0.999	0.999	0.0264	0.9714	0.0278	1	0.998942612244898	0.998988244897959	0.0261798367346939	0.973154367346939	0.0477981224489796	1	0.000443190711999786	0.000438776826387494	0.00526656986503144	0.0241848423728632	0.0280526463759508
404	3 vs. 41	2	0.9973	0.9973	0.031	1	0.1667	2	0.997084244897959	0.997079102040816	0.0320324897959184	0.98314506122449	0.13334	2	0.00167378038871567	0.00167997748687571	0.00839505607048402	0.0172091595875419	0.019070642667847
405	3 vs. 41	3	0.9908	0.984	0.0428	0.9565	0.3611	3	0.978327836734694	0.963547755102041	0.0622181224489796	0.938534775510204	0.40110987755102	3	0.0162470837193968	0.0272804614226038	0.0217686779856555	0.0527818480087459	0.0383368411702942
406	3 vs. 42	1	0.9991	0.9991	0.0247	0.9714	0.0278	1	0.998942612244898	0.998988244897959	0.0261798367346939	0.973154367346939	0.0477981224489796	1	0.000443190711999786	0.000438776826387494	0.00526656986503144	0.0241848423728632	0.0280526463759508
407	3 vs. 42	2	0.9939	0.9936	0.0475	0.9677	0.1389	2	0.997084244897959	0.997079102040816	0.0320324897959184	0.98314506122449	0.13334	2	0.00167378038871567	0.00167997748687571	0.00839505607048402	0.0172091595875419	0.019070642667847
408	3 vs. 42	3	0.9821	0.9688	0.0596	0.9524	0.4167	3	0.978327836734694	0.963547755102041	0.0622181224489796	0.938534775510204	0.40110987755102	3	0.0162470837193968	0.0272804614226038	0.0217686779856555	0.0527818480087459	0.0383368411702942
409	3 vs. 43	1	0.999	0.9991	0.0245	1	0.0556	1	0.998942612244898	0.998988244897959	0.0261798367346939	0.973154367346939	0.0477981224489796	1	0.000443190711999786	0.000438776826387494	0.00526656986503144	0.0241848423728632	0.0280526463759508
410	3 vs. 43	2	0.9978	0.9979	0.0286	0.9677	0.1389	2	0.997084244897959	0.997079102040816	0.0320324897959184	0.98314506122449	0.13334	2	0.00167378038871567	0.00167997748687571	0.00839505607048402	0.0172091595875419	0.019070642667847
411	3 vs. 43	3	0.9866	0.9802	0.0516	0.9	0.4444	3	0.978327836734694	0.963547755102041	0.0622181224489796	0.938534775510204	0.40110987755102	3	0.0162470837193968	0.0272804614226038	0.0217686779856555	0.0527818480087459	0.0383368411702942
412	3 vs. 44	1	0.9992	0.9994	0.0242	1	0.0556	1	0.998942612244898	0.998988244897959	0.0261798367346939	0.973154367346939	0.0477981224489796	1	0.000443190711999786	0.000438776826387494	0.00526656986503144	0.0241848423728632	0.0280526463759508
413	3 vs. 44	2	0.9975	0.9974	0.03	0.9677	0.1389	2	0.997084244897959	0.997079102040816	0.0320324897959184	0.98314506122449	0.13334	2	0.00167378038871567	0.00167997748687571	0.00839505607048402	0.0172091595875419	0.019070642667847
414	3 vs. 44	3	0.9773	0.9605	0.0673	1	0.3889	3	0.978327836734694	0.963547755102041	0.0622181224489796	0.938534775510204	0.40110987755102	3	0.0162470837193968	0.0272804614226038	0.0217686779856555	0.0527818480087459	0.0383368411702942
415	3 vs. 45	1	0.9989	0.999	0.0261	1	0.0556	1	0.998942612244898	0.998988244897959	0.0261798367346939	0.973154367346939	0.0477981224489796	1	0.000443190711999786	0.000438776826387494	0.00526656986503144	0.0241848423728632	0.0280526463759508
416	3 vs. 45	2	0.9979	0.9979	0.0291	0.9677	0.1389	2	0.997084244897959	0.997079102040816	0.0320324897959184	0.98314506122449	0.13334	2	0.00167378038871567	0.00167997748687571	0.00839505607048402	0.0172091595875419	0.019070642667847
417	3 vs. 45	3	0.9944	0.9917	0.0334	1	0.3889	3	0.978327836734694	0.963547755102041	0.0622181224489796	0.938534775510204	0.40110987755102	3	0.0162470837193968	0.0272804614226038	0.0217686779856555	0.0527818480087459	0.0383368411702942
418	3 vs. 46	1	0.9996	0.9996	0.0167	0.9697	0.0833	1	0.998942612244898	0.998988244897959	0.0261798367346939	0.973154367346939	0.0477981224489796	1	0.000443190711999786	0.000438776826387494	0.00526656986503144	0.0241848423728632	0.0280526463759508
419	3 vs. 46	2	0.998	0.9979	0.0268	1	0.1667	2	0.997084244897959	0.997079102040816	0.0320324897959184	0.98314506122449	0.13334	2	0.00167378038871567	0.00167997748687571	0.00839505607048402	0.0172091595875419	0.019070642667847
420	3 vs. 46	3	0.9922	0.9869	0.0396	0.9524	0.4167	3	0.978327836734694	0.963547755102041	0.0622181224489796	0.938534775510204	0.40110987755102	3	0.0162470837193968	0.0272804614226038	0.0217686779856555	0.0527818480087459	0.0383368411702942
421	3 vs. 47	1	0.9993	0.9994	0.021	1	0.0556	1	0.998942612244898	0.998988244897959	0.0261798367346939	0.973154367346939	0.0477981224489796	1	0.000443190711999786	0.000438776826387494	0.00526656986503144	0.0241848423728632	0.0280526463759508
422	3 vs. 47	2	0.9989	0.9989	0.0199	1	0.1667	2	0.997084244897959	0.997079102040816	0.0320324897959184	0.98314506122449	0.13334	2	0.00167378038871567	0.00167997748687571	0.00839505607048402	0.0172091595875419	0.019070642667847
423	3 vs. 47	3	0.9937	0.989	0.0356	1	0.3889	3	0.978327836734694	0.963547755102041	0.0622181224489796	0.938534775510204	0.40110987755102	3	0.0162470837193968	0.0272804614226038	0.0217686779856555	0.0527818480087459	0.0383368411702942
424	3 vs. 48	1	0.9991	0.9991	0.0241	0.9412	0.0556	1	0.998942612244898	0.998988244897959	0.0261798367346939	0.973154367346939	0.0477981224489796	1	0.000443190711999786	0.000438776826387494	0.00526656986503144	0.0241848423728632	0.0280526463759508
425	3 vs. 48	2	0.9977	0.9977	0.0301	0.9677	0.1389	2	0.997084244897959	0.997079102040816	0.0320324897959184	0.98314506122449	0.13334	2	0.00167378038871567	0.00167997748687571	0.00839505607048402	0.0172091595875419	0.019070642667847
426	3 vs. 48	3	0.9903	0.983	0.0441	1	0.3889	3	0.978327836734694	0.963547755102041	0.0622181224489796	0.938534775510204	0.40110987755102	3	0.0162470837193968	0.0272804614226038	0.0217686779856555	0.0527818480087459	0.0383368411702942
427	3 vs. 49	1	0.999	0.999	0.0258	0.9714	0.0278	1	0.998942612244898	0.998988244897959	0.0261798367346939	0.973154367346939	0.0477981224489796	1	0.000443190711999786	0.000438776826387494	0.00526656986503144	0.0241848423728632	0.0280526463759508
428	3 vs. 49	2	0.9984	0.9983	0.0252	1	0.1667	2	0.997084244897959	0.997079102040816	0.0320324897959184	0.98314506122449	0.13334	2	0.00167378038871567	0.00167997748687571	0.00839505607048402	0.0172091595875419	0.019070642667847
429	3 vs. 49	3	0.9877	0.9782	0.0509	1	0.3889	3	0.978327836734694	0.963547755102041	0.0622181224489796	0.938534775510204	0.40110987755102	3	0.0162470837193968	0.0272804614226038	0.0217686779856555	0.0527818480087459	0.0383368411702942
430	3 vs. 50	1	0.9986	0.9987	0.0291	0.9375	0.1111	1	0.998942612244898	0.998988244897959	0.0261798367346939	0.973154367346939	0.0477981224489796	1	0.000443190711999786	0.000438776826387494	0.00526656986503144	0.0241848423728632	0.0280526463759508
431	3 vs. 50	2	0.9962	0.9961	0.037	0.9677	0.1389	2	0.997084244897959	0.997079102040816	0.0320324897959184	0.98314506122449	0.13334	2	0.00167378038871567	0.00167997748687571	0.00839505607048402	0.0172091595875419	0.019070642667847
432	3 vs. 50	3	0.9927	0.9888	0.0383	0.9524	0.4167	3	0.978327836734694	0.963547755102041	0.0622181224489796	0.938534775510204	0.40110987755102	3	0.0162470837193968	0.0272804614226038	0.0217686779856555	0.0527818480087459	0.0383368411702942
433	4 vs. 5	1	0.9988	0.9988	0.0271	0.9714	0.0278	1	0.998942612244898	0.998988244897959	0.0261798367346939	0.973154367346939	0.0477981224489796	1	0.000443190711999786	0.000438776826387494	0.00526656986503144	0.0241848423728632	0.0280526463759508
434	4 vs. 5	2	0.9992	0.9992	0.0185	1	0.1111	2	0.997084244897959	0.997079102040816	0.0320324897959184	0.98314506122449	0.13334	2	0.00167378038871567	0.00167997748687571	0.00839505607048402	0.0172091595875419	0.019070642667847
435	4 vs. 5	3	0.9828	0.9814	0.0594	0.9091	0.3889	3	0.978327836734694	0.963547755102041	0.0622181224489796	0.938534775510204	0.40110987755102	3	0.0162470837193968	0.0272804614226038	0.0217686779856555	0.0527818480087459	0.0383368411702942
436	4 vs. 6	1	0.9992	0.9992	0.0232	0.9714	0.0278	1	0.998942612244898	0.998988244897959	0.0261798367346939	0.973154367346939	0.0477981224489796	1	0.000443190711999786	0.000438776826387494	0.00526656986503144	0.0241848423728632	0.0280526463759508
437	4 vs. 6	2	0.9985	0.9985	0.0224	1	0.1111	2	0.997084244897959	0.997079102040816	0.0320324897959184	0.98314506122449	0.13334	2	0.00167378038871567	0.00167997748687571	0.00839505607048402	0.0172091595875419	0.019070642667847
438	4 vs. 6	3	0.9877	0.9795	0.0504	1	0.3333	3	0.978327836734694	0.963547755102041	0.0622181224489796	0.938534775510204	0.40110987755102	3	0.0162470837193968	0.0272804614226038	0.0217686779856555	0.0527818480087459	0.0383368411702942
439	4 vs. 7	1	0.9994	0.9994	0.0197	0.9714	0.0278	1	0.998942612244898	0.998988244897959	0.0261798367346939	0.973154367346939	0.0477981224489796	1	0.000443190711999786	0.000438776826387494	0.00526656986503144	0.0241848423728632	0.0280526463759508
440	4 vs. 7	2	0.9989	0.9989	0.0215	0.9677	0.1389	2	0.997084244897959	0.997079102040816	0.0320324897959184	0.98314506122449	0.13334	2	0.00167378038871567	0.00167997748687571	0.00839505607048402	0.0172091595875419	0.019070642667847
441	4 vs. 7	3	0.9918	0.9881	0.0415	0.9565	0.3611	3	0.978327836734694	0.963547755102041	0.0622181224489796	0.938534775510204	0.40110987755102	3	0.0162470837193968	0.0272804614226038	0.0217686779856555	0.0527818480087459	0.0383368411702942
442	4 vs. 8	1	0.9986	0.9986	0.03	0.9714	0.0278	1	0.998942612244898	0.998988244897959	0.0261798367346939	0.973154367346939	0.0477981224489796	1	0.000443190711999786	0.000438776826387494	0.00526656986503144	0.0241848423728632	0.0280526463759508
443	4 vs. 8	2	0.9974	0.9979	0.0313	0.9677	0.1389	2	0.997084244897959	0.997079102040816	0.0320324897959184	0.98314506122449	0.13334	2	0.00167378038871567	0.00167997748687571	0.00839505607048402	0.0172091595875419	0.019070642667847
444	4 vs. 8	3	0.9344	0.8885	0.1153	0.7826	0.3611	3	0.978327836734694	0.963547755102041	0.0622181224489796	0.938534775510204	0.40110987755102	3	0.0162470837193968	0.0272804614226038	0.0217686779856555	0.0527818480087459	0.0383368411702942
445	4 vs. 9	1	0.9988	0.9989	0.0279	1	0	1	0.998942612244898	0.998988244897959	0.0261798367346939	0.973154367346939	0.0477981224489796	1	0.000443190711999786	0.000438776826387494	0.00526656986503144	0.0241848423728632	0.0280526463759508
446	4 vs. 9	2	0.9989	0.9989	0.0217	1	0.1111	2	0.997084244897959	0.997079102040816	0.0320324897959184	0.98314506122449	0.13334	2	0.00167378038871567	0.00167997748687571	0.00839505607048402	0.0172091595875419	0.019070642667847
447	4 vs. 9	3	0.9922	0.9899	0.0402	0.9565	0.3611	3	0.978327836734694	0.963547755102041	0.0622181224489796	0.938534775510204	0.40110987755102	3	0.0162470837193968	0.0272804614226038	0.0217686779856555	0.0527818480087459	0.0383368411702942
448	4 vs. 10	1	0.9991	0.9992	0.0246	0.9412	0.0556	1	0.998942612244898	0.998988244897959	0.0261798367346939	0.973154367346939	0.0477981224489796	1	0.000443190711999786	0.000438776826387494	0.00526656986503144	0.0241848423728632	0.0280526463759508
449	4 vs. 10	2	0.9977	0.9976	0.0317	0.9677	0.1389	2	0.997084244897959	0.997079102040816	0.0320324897959184	0.98314506122449	0.13334	2	0.00167378038871567	0.00167997748687571	0.00839505607048402	0.0172091595875419	0.019070642667847
450	4 vs. 10	3	0.9671	0.9464	0.0822	0.9091	0.3889	3	0.978327836734694	0.963547755102041	0.0622181224489796	0.938534775510204	0.40110987755102	3	0.0162470837193968	0.0272804614226038	0.0217686779856555	0.0527818480087459	0.0383368411702942
451	4 vs. 11	1	0.9993	0.9994	0.0214	0.9714	0.0278	1	0.998942612244898	0.998988244897959	0.0261798367346939	0.973154367346939	0.0477981224489796	1	0.000443190711999786	0.000438776826387494	0.00526656986503144	0.0241848423728632	0.0280526463759508
452	4 vs. 11	2	0.9977	0.9976	0.0285	0.9677	0.1389	2	0.997084244897959	0.997079102040816	0.0320324897959184	0.98314506122449	0.13334	2	0.00167378038871567	0.00167997748687571	0.00839505607048402	0.0172091595875419	0.019070642667847
453	4 vs. 11	3	0.978	0.9646	0.0674	0.9167	0.3333	3	0.978327836734694	0.963547755102041	0.0622181224489796	0.938534775510204	0.40110987755102	3	0.0162470837193968	0.0272804614226038	0.0217686779856555	0.0527818480087459	0.0383368411702942
454	4 vs. 12	1	0.9991	0.9991	0.0243	1	0	1	0.998942612244898	0.998988244897959	0.0261798367346939	0.973154367346939	0.0477981224489796	1	0.000443190711999786	0.000438776826387494	0.00526656986503144	0.0241848423728632	0.0280526463759508
455	4 vs. 12	2	0.9992	0.9991	0.0175	0.9677	0.1389	2	0.997084244897959	0.997079102040816	0.0320324897959184	0.98314506122449	0.13334	2	0.00167378038871567	0.00167997748687571	0.00839505607048402	0.0172091595875419	0.019070642667847
456	4 vs. 12	3	0.9657	0.9435	0.0836	0.8571	0.4167	3	0.978327836734694	0.963547755102041	0.0622181224489796	0.938534775510204	0.40110987755102	3	0.0162470837193968	0.0272804614226038	0.0217686779856555	0.0527818480087459	0.0383368411702942
457	4 vs. 13	1	0.9984	0.9985	0.0323	0.9714	0.0278	1	0.998942612244898	0.998988244897959	0.0261798367346939	0.973154367346939	0.0477981224489796	1	0.000443190711999786	0.000438776826387494	0.00526656986503144	0.0241848423728632	0.0280526463759508
458	4 vs. 13	2	0.9987	0.9987	0.0266	1	0.1111	2	0.997084244897959	0.997079102040816	0.0320324897959184	0.98314506122449	0.13334	2	0.00167378038871567	0.00167997748687571	0.00839505607048402	0.0172091595875419	0.019070642667847
459	4 vs. 13	3	0.9896	0.9827	0.0479	0.9091	0.3889	3	0.978327836734694	0.963547755102041	0.0622181224489796	0.938534775510204	0.40110987755102	3	0.0162470837193968	0.0272804614226038	0.0217686779856555	0.0527818480087459	0.0383368411702942
460	4 vs. 14	1	0.9989	0.999	0.0263	1	0	1	0.998942612244898	0.998988244897959	0.0261798367346939	0.973154367346939	0.0477981224489796	1	0.000443190711999786	0.000438776826387494	0.00526656986503144	0.0241848423728632	0.0280526463759508
461	4 vs. 14	2	0.9988	0.9988	0.0226	1	0.1111	2	0.997084244897959	0.997079102040816	0.0320324897959184	0.98314506122449	0.13334	2	0.00167378038871567	0.00167997748687571	0.00839505607048402	0.0172091595875419	0.019070642667847
462	4 vs. 14	3	0.9956	0.9932	0.0304	1	0.3333	3	0.978327836734694	0.963547755102041	0.0622181224489796	0.938534775510204	0.40110987755102	3	0.0162470837193968	0.0272804614226038	0.0217686779856555	0.0527818480087459	0.0383368411702942
463	4 vs. 15	1	0.9989	0.9989	0.0259	0.9714	0.0278	1	0.998942612244898	0.998988244897959	0.0261798367346939	0.973154367346939	0.0477981224489796	1	0.000443190711999786	0.000438776826387494	0.00526656986503144	0.0241848423728632	0.0280526463759508
464	4 vs. 15	2	0.9976	0.9978	0.0302	0.9677	0.1389	2	0.997084244897959	0.997079102040816	0.0320324897959184	0.98314506122449	0.13334	2	0.00167378038871567	0.00167997748687571	0.00839505607048402	0.0172091595875419	0.019070642667847
465	4 vs. 15	3	0.9767	0.9659	0.069	0.9565	0.3611	3	0.978327836734694	0.963547755102041	0.0622181224489796	0.938534775510204	0.40110987755102	3	0.0162470837193968	0.0272804614226038	0.0217686779856555	0.0527818480087459	0.0383368411702942
466	4 vs. 16	1	0.9989	0.999	0.0263	0.9714	0.0278	1	0.998942612244898	0.998988244897959	0.0261798367346939	0.973154367346939	0.0477981224489796	1	0.000443190711999786	0.000438776826387494	0.00526656986503144	0.0241848423728632	0.0280526463759508
467	4 vs. 16	2	0.9969	0.9969	0.0359	1	0.1111	2	0.997084244897959	0.997079102040816	0.0320324897959184	0.98314506122449	0.13334	2	0.00167378038871567	0.00167997748687571	0.00839505607048402	0.0172091595875419	0.019070642667847
468	4 vs. 16	3	0.9939	0.9901	0.0356	1	0.3333	3	0.978327836734694	0.963547755102041	0.0622181224489796	0.938534775510204	0.40110987755102	3	0.0162470837193968	0.0272804614226038	0.0217686779856555	0.0527818480087459	0.0383368411702942
469	4 vs. 17	1	0.9993	0.9993	0.0222	0.9714	0.0278	1	0.998942612244898	0.998988244897959	0.0261798367346939	0.973154367346939	0.0477981224489796	1	0.000443190711999786	0.000438776826387494	0.00526656986503144	0.0241848423728632	0.0280526463759508
470	4 vs. 17	2	0.9973	0.9973	0.0316	1	0.1111	2	0.997084244897959	0.997079102040816	0.0320324897959184	0.98314506122449	0.13334	2	0.00167378038871567	0.00167997748687571	0.00839505607048402	0.0172091595875419	0.019070642667847
471	4 vs. 17	3	0.9794	0.9699	0.0649	0.9565	0.3611	3	0.978327836734694	0.963547755102041	0.0622181224489796	0.938534775510204	0.40110987755102	3	0.0162470837193968	0.0272804614226038	0.0217686779856555	0.0527818480087459	0.0383368411702942
472	4 vs. 18	1	0.9987	0.9987	0.0305	0.9714	0.0278	1	0.998942612244898	0.998988244897959	0.0261798367346939	0.973154367346939	0.0477981224489796	1	0.000443190711999786	0.000438776826387494	0.00526656986503144	0.0241848423728632	0.0280526463759508
473	4 vs. 18	2	0.9946	0.9949	0.0433	0.9677	0.1389	2	0.997084244897959	0.997079102040816	0.0320324897959184	0.98314506122449	0.13334	2	0.00167378038871567	0.00167997748687571	0.00839505607048402	0.0172091595875419	0.019070642667847
474	4 vs. 18	3	0.9835	0.9785	0.0585	0.9565	0.3611	3	0.978327836734694	0.963547755102041	0.0622181224489796	0.938534775510204	0.40110987755102	3	0.0162470837193968	0.0272804614226038	0.0217686779856555	0.0527818480087459	0.0383368411702942
475	4 vs. 19	1	0.9983	0.9983	0.0327	0.9714	0.0278	1	0.998942612244898	0.998988244897959	0.0261798367346939	0.973154367346939	0.0477981224489796	1	0.000443190711999786	0.000438776826387494	0.00526656986503144	0.0241848423728632	0.0280526463759508
476	4 vs. 19	2	0.9982	0.9982	0.0256	1	0.1111	2	0.997084244897959	0.997079102040816	0.0320324897959184	0.98314506122449	0.13334	2	0.00167378038871567	0.00167997748687571	0.00839505607048402	0.0172091595875419	0.019070642667847
477	4 vs. 19	3	0.9821	0.9754	0.0615	0.96	0.3056	3	0.978327836734694	0.963547755102041	0.0622181224489796	0.938534775510204	0.40110987755102	3	0.0162470837193968	0.0272804614226038	0.0217686779856555	0.0527818480087459	0.0383368411702942
478	4 vs. 20	1	0.9988	0.9988	0.0285	1	0	1	0.998942612244898	0.998988244897959	0.0261798367346939	0.973154367346939	0.0477981224489796	1	0.000443190711999786	0.000438776826387494	0.00526656986503144	0.0241848423728632	0.0280526463759508
479	4 vs. 20	2	0.9977	0.9976	0.0285	1	0.1111	2	0.997084244897959	0.997079102040816	0.0320324897959184	0.98314506122449	0.13334	2	0.00167378038871567	0.00167997748687571	0.00839505607048402	0.0172091595875419	0.019070642667847
480	4 vs. 20	3	0.9756	0.9645	0.0706	0.9167	0.3333	3	0.978327836734694	0.963547755102041	0.0622181224489796	0.938534775510204	0.40110987755102	3	0.0162470837193968	0.0272804614226038	0.0217686779856555	0.0527818480087459	0.0383368411702942
481	4 vs. 21	1	0.999	0.999	0.0272	1	0	1	0.998942612244898	0.998988244897959	0.0261798367346939	0.973154367346939	0.0477981224489796	1	0.000443190711999786	0.000438776826387494	0.00526656986503144	0.0241848423728632	0.0280526463759508
482	4 vs. 21	2	0.9985	0.9984	0.023	1	0.1111	2	0.997084244897959	0.997079102040816	0.0320324897959184	0.98314506122449	0.13334	2	0.00167378038871567	0.00167997748687571	0.00839505607048402	0.0172091595875419	0.019070642667847
483	4 vs. 21	3	0.9751	0.9617	0.072	0.9565	0.3611	3	0.978327836734694	0.963547755102041	0.0622181224489796	0.938534775510204	0.40110987755102	3	0.0162470837193968	0.0272804614226038	0.0217686779856555	0.0527818480087459	0.0383368411702942
484	4 vs. 22	1	0.9982	0.9982	0.034	0.9714	0.0278	1	0.998942612244898	0.998988244897959	0.0261798367346939	0.973154367346939	0.0477981224489796	1	0.000443190711999786	0.000438776826387494	0.00526656986503144	0.0241848423728632	0.0280526463759508
485	4 vs. 22	2	0.9978	0.9977	0.0303	1	0.1111	2	0.997084244897959	0.997079102040816	0.0320324897959184	0.98314506122449	0.13334	2	0.00167378038871567	0.00167997748687571	0.00839505607048402	0.0172091595875419	0.019070642667847
486	4 vs. 22	3	0.9863	0.9778	0.0531	0.9565	0.3611	3	0.978327836734694	0.963547755102041	0.0622181224489796	0.938534775510204	0.40110987755102	3	0.0162470837193968	0.0272804614226038	0.0217686779856555	0.0527818480087459	0.0383368411702942
487	4 vs. 23	1	0.9985	0.9985	0.0319	0.9714	0.0278	1	0.998942612244898	0.998988244897959	0.0261798367346939	0.973154367346939	0.0477981224489796	1	0.000443190711999786	0.000438776826387494	0.00526656986503144	0.0241848423728632	0.0280526463759508
488	4 vs. 23	2	0.9994	0.9994	0.0146	1	0.1111	2	0.997084244897959	0.997079102040816	0.0320324897959184	0.98314506122449	0.13334	2	0.00167378038871567	0.00167997748687571	0.00839505607048402	0.0172091595875419	0.019070642667847
489	4 vs. 23	3	0.9811	0.977	0.0621	0.9565	0.3611	3	0.978327836734694	0.963547755102041	0.0622181224489796	0.938534775510204	0.40110987755102	3	0.0162470837193968	0.0272804614226038	0.0217686779856555	0.0527818480087459	0.0383368411702942
490	4 vs. 24	1	0.9994	0.9994	0.0202	1	0	1	0.998942612244898	0.998988244897959	0.0261798367346939	0.973154367346939	0.0477981224489796	1	0.000443190711999786	0.000438776826387494	0.00526656986503144	0.0241848423728632	0.0280526463759508
491	4 vs. 24	2	0.9995	0.9995	0.0168	0.9677	0.1389	2	0.997084244897959	0.997079102040816	0.0320324897959184	0.98314506122449	0.13334	2	0.00167378038871567	0.00167997748687571	0.00839505607048402	0.0172091595875419	0.019070642667847
492	4 vs. 24	3	0.9852	0.9771	0.0572	0.9565	0.3611	3	0.978327836734694	0.963547755102041	0.0622181224489796	0.938534775510204	0.40110987755102	3	0.0162470837193968	0.0272804614226038	0.0217686779856555	0.0527818480087459	0.0383368411702942
493	4 vs. 25	1	0.9994	0.9994	0.0196	1	0	1	0.998942612244898	0.998988244897959	0.0261798367346939	0.973154367346939	0.0477981224489796	1	0.000443190711999786	0.000438776826387494	0.00526656986503144	0.0241848423728632	0.0280526463759508
494	4 vs. 25	2	0.9987	0.9987	0.0219	0.9677	0.1389	2	0.997084244897959	0.997079102040816	0.0320324897959184	0.98314506122449	0.13334	2	0.00167378038871567	0.00167997748687571	0.00839505607048402	0.0172091595875419	0.019070642667847
495	4 vs. 25	3	0.9846	0.9791	0.0573	0.9565	0.3611	3	0.978327836734694	0.963547755102041	0.0622181224489796	0.938534775510204	0.40110987755102	3	0.0162470837193968	0.0272804614226038	0.0217686779856555	0.0527818480087459	0.0383368411702942
496	4 vs. 26	1	0.9995	0.9995	0.0191	1	0	1	0.998942612244898	0.998988244897959	0.0261798367346939	0.973154367346939	0.0477981224489796	1	0.000443190711999786	0.000438776826387494	0.00526656986503144	0.0241848423728632	0.0280526463759508
497	4 vs. 26	2	0.9982	0.9981	0.0288	0.9677	0.1389	2	0.997084244897959	0.997079102040816	0.0320324897959184	0.98314506122449	0.13334	2	0.00167378038871567	0.00167997748687571	0.00839505607048402	0.0172091595875419	0.019070642667847
498	4 vs. 26	3	0.9817	0.9729	0.0622	0.9565	0.3611	3	0.978327836734694	0.963547755102041	0.0622181224489796	0.938534775510204	0.40110987755102	3	0.0162470837193968	0.0272804614226038	0.0217686779856555	0.0527818480087459	0.0383368411702942
499	4 vs. 27	1	0.9988	0.9989	0.0275	0.9412	0.0556	1	0.998942612244898	0.998988244897959	0.0261798367346939	0.973154367346939	0.0477981224489796	1	0.000443190711999786	0.000438776826387494	0.00526656986503144	0.0241848423728632	0.0280526463759508
500	4 vs. 27	2	0.9975	0.9977	0.0324	1	0.1111	2	0.997084244897959	0.997079102040816	0.0320324897959184	0.98314506122449	0.13334	2	0.00167378038871567	0.00167997748687571	0.00839505607048402	0.0172091595875419	0.019070642667847
501	4 vs. 27	3	0.9651	0.9436	0.0842	0.8571	0.4167	3	0.978327836734694	0.963547755102041	0.0622181224489796	0.938534775510204	0.40110987755102	3	0.0162470837193968	0.0272804614226038	0.0217686779856555	0.0527818480087459	0.0383368411702942
502	4 vs. 28	1	0.9989	0.9991	0.0266	1	0	1	0.998942612244898	0.998988244897959	0.0261798367346939	0.973154367346939	0.0477981224489796	1	0.000443190711999786	0.000438776826387494	0.00526656986503144	0.0241848423728632	0.0280526463759508
503	4 vs. 28	2	0.9973	0.9975	0.0317	1	0.1111	2	0.997084244897959	0.997079102040816	0.0320324897959184	0.98314506122449	0.13334	2	0.00167378038871567	0.00167997748687571	0.00839505607048402	0.0172091595875419	0.019070642667847
504	4 vs. 28	3	0.9865	0.9815	0.0533	0.9091	0.3889	3	0.978327836734694	0.963547755102041	0.0622181224489796	0.938534775510204	0.40110987755102	3	0.0162470837193968	0.0272804614226038	0.0217686779856555	0.0527818480087459	0.0383368411702942
505	4 vs. 29	1	0.9995	0.9995	0.0183	0.9714	0.0278	1	0.998942612244898	0.998988244897959	0.0261798367346939	0.973154367346939	0.0477981224489796	1	0.000443190711999786	0.000438776826387494	0.00526656986503144	0.0241848423728632	0.0280526463759508
506	4 vs. 29	2	0.9984	0.9984	0.025	1	0.1111	2	0.997084244897959	0.997079102040816	0.0320324897959184	0.98314506122449	0.13334	2	0.00167378038871567	0.00167997748687571	0.00839505607048402	0.0172091595875419	0.019070642667847
507	4 vs. 29	3	0.9876	0.9793	0.0513	0.9565	0.3611	3	0.978327836734694	0.963547755102041	0.0622181224489796	0.938534775510204	0.40110987755102	3	0.0162470837193968	0.0272804614226038	0.0217686779856555	0.0527818480087459	0.0383368411702942
508	4 vs. 30	1	0.9993	0.9994	0.0214	1	0	1	0.998942612244898	0.998988244897959	0.0261798367346939	0.973154367346939	0.0477981224489796	1	0.000443190711999786	0.000438776826387494	0.00526656986503144	0.0241848423728632	0.0280526463759508
509	4 vs. 30	2	0.9986	0.9986	0.022	0.9677	0.1389	2	0.997084244897959	0.997079102040816	0.0320324897959184	0.98314506122449	0.13334	2	0.00167378038871567	0.00167997748687571	0.00839505607048402	0.0172091595875419	0.019070642667847
510	4 vs. 30	3	0.9693	0.9512	0.079	0.8571	0.4167	3	0.978327836734694	0.963547755102041	0.0622181224489796	0.938534775510204	0.40110987755102	3	0.0162470837193968	0.0272804614226038	0.0217686779856555	0.0527818480087459	0.0383368411702942
511	4 vs. 31	1	0.9993	0.9993	0.0232	0.9714	0.0278	1	0.998942612244898	0.998988244897959	0.0261798367346939	0.973154367346939	0.0477981224489796	1	0.000443190711999786	0.000438776826387494	0.00526656986503144	0.0241848423728632	0.0280526463759508
512	4 vs. 31	2	0.9992	0.9991	0.0168	1	0.1111	2	0.997084244897959	0.997079102040816	0.0320324897959184	0.98314506122449	0.13334	2	0.00167378038871567	0.00167997748687571	0.00839505607048402	0.0172091595875419	0.019070642667847
513	4 vs. 31	3	0.9736	0.956	0.0734	0.9091	0.3889	3	0.978327836734694	0.963547755102041	0.0622181224489796	0.938534775510204	0.40110987755102	3	0.0162470837193968	0.0272804614226038	0.0217686779856555	0.0527818480087459	0.0383368411702942
514	4 vs. 32	1	0.9993	0.9993	0.0208	0.9714	0.0278	1	0.998942612244898	0.998988244897959	0.0261798367346939	0.973154367346939	0.0477981224489796	1	0.000443190711999786	0.000438776826387494	0.00526656986503144	0.0241848423728632	0.0280526463759508
515	4 vs. 32	2	0.9982	0.9981	0.0329	1	0.1111	2	0.997084244897959	0.997079102040816	0.0320324897959184	0.98314506122449	0.13334	2	0.00167378038871567	0.00167997748687571	0.00839505607048402	0.0172091595875419	0.019070642667847
516	4 vs. 32	3	0.9896	0.9828	0.0465	1	0.3333	3	0.978327836734694	0.963547755102041	0.0622181224489796	0.938534775510204	0.40110987755102	3	0.0162470837193968	0.0272804614226038	0.0217686779856555	0.0527818480087459	0.0383368411702942
517	4 vs. 33	1	0.9989	0.999	0.0267	0.9091	0.0833	1	0.998942612244898	0.998988244897959	0.0261798367346939	0.973154367346939	0.0477981224489796	1	0.000443190711999786	0.000438776826387494	0.00526656986503144	0.0241848423728632	0.0280526463759508
518	4 vs. 33	2	0.9957	0.9956	0.0393	0.9677	0.1389	2	0.997084244897959	0.997079102040816	0.0320324897959184	0.98314506122449	0.13334	2	0.00167378038871567	0.00167997748687571	0.00839505607048402	0.0172091595875419	0.019070642667847
519	4 vs. 33	3	0.9837	0.9787	0.0581	0.8571	0.4167	3	0.978327836734694	0.963547755102041	0.0622181224489796	0.938534775510204	0.40110987755102	3	0.0162470837193968	0.0272804614226038	0.0217686779856555	0.0527818480087459	0.0383368411702942
520	4 vs. 34	1	0.9993	0.9995	0.0204	0.9714	0.0278	1	0.998942612244898	0.998988244897959	0.0261798367346939	0.973154367346939	0.0477981224489796	1	0.000443190711999786	0.000438776826387494	0.00526656986503144	0.0241848423728632	0.0280526463759508
521	4 vs. 34	2	0.9977	0.9977	0.0299	1	0.1111	2	0.997084244897959	0.997079102040816	0.0320324897959184	0.98314506122449	0.13334	2	0.00167378038871567	0.00167997748687571	0.00839505607048402	0.0172091595875419	0.019070642667847
522	4 vs. 34	3	0.9929	0.9899	0.0387	0.9565	0.3611	3	0.978327836734694	0.963547755102041	0.0622181224489796	0.938534775510204	0.40110987755102	3	0.0162470837193968	0.0272804614226038	0.0217686779856555	0.0527818480087459	0.0383368411702942
523	4 vs. 35	1	0.9996	0.9996	0.0168	0.9714	0.0278	1	0.998942612244898	0.998988244897959	0.0261798367346939	0.973154367346939	0.0477981224489796	1	0.000443190711999786	0.000438776826387494	0.00526656986503144	0.0241848423728632	0.0280526463759508
524	4 vs. 35	2	0.9972	0.9972	0.0355	0.9677	0.1389	2	0.997084244897959	0.997079102040816	0.0320324897959184	0.98314506122449	0.13334	2	0.00167378038871567	0.00167997748687571	0.00839505607048402	0.0172091595875419	0.019070642667847
525	4 vs. 35	3	0.9923	0.9877	0.0407	0.9565	0.3611	3	0.978327836734694	0.963547755102041	0.0622181224489796	0.938534775510204	0.40110987755102	3	0.0162470837193968	0.0272804614226038	0.0217686779856555	0.0527818480087459	0.0383368411702942
526	4 vs. 36	1	0.999	0.999	0.0252	0.9714	0.0278	1	0.998942612244898	0.998988244897959	0.0261798367346939	0.973154367346939	0.0477981224489796	1	0.000443190711999786	0.000438776826387494	0.00526656986503144	0.0241848423728632	0.0280526463759508
527	4 vs. 36	2	0.997	0.997	0.0363	1	0.1111	2	0.997084244897959	0.997079102040816	0.0320324897959184	0.98314506122449	0.13334	2	0.00167378038871567	0.00167997748687571	0.00839505607048402	0.0172091595875419	0.019070642667847
528	4 vs. 36	3	0.9934	0.9896	0.0409	1	0.3333	3	0.978327836734694	0.963547755102041	0.0622181224489796	0.938534775510204	0.40110987755102	3	0.0162470837193968	0.0272804614226038	0.0217686779856555	0.0527818480087459	0.0383368411702942
529	4 vs. 37	1	0.9992	0.9993	0.0223	0.9412	0.0556	1	0.998942612244898	0.998988244897959	0.0261798367346939	0.973154367346939	0.0477981224489796	1	0.000443190711999786	0.000438776826387494	0.00526656986503144	0.0241848423728632	0.0280526463759508
530	4 vs. 37	2	0.9989	0.9988	0.0208	0.9677	0.1389	2	0.997084244897959	0.997079102040816	0.0320324897959184	0.98314506122449	0.13334	2	0.00167378038871567	0.00167997748687571	0.00839505607048402	0.0172091595875419	0.019070642667847
531	4 vs. 37	3	0.9746	0.9606	0.072	0.9091	0.3889	3	0.978327836734694	0.963547755102041	0.0622181224489796	0.938534775510204	0.40110987755102	3	0.0162470837193968	0.0272804614226038	0.0217686779856555	0.0527818480087459	0.0383368411702942
532	4 vs. 38	1	0.9992	0.9993	0.0272	0.9714	0.0278	1	0.998942612244898	0.998988244897959	0.0261798367346939	0.973154367346939	0.0477981224489796	1	0.000443190711999786	0.000438776826387494	0.00526656986503144	0.0241848423728632	0.0280526463759508
533	4 vs. 38	2	0.9987	0.9986	0.0221	1	0.1111	2	0.997084244897959	0.997079102040816	0.0320324897959184	0.98314506122449	0.13334	2	0.00167378038871567	0.00167997748687571	0.00839505607048402	0.0172091595875419	0.019070642667847
534	4 vs. 38	3	0.9759	0.9606	0.0702	0.8571	0.4167	3	0.978327836734694	0.963547755102041	0.0622181224489796	0.938534775510204	0.40110987755102	3	0.0162470837193968	0.0272804614226038	0.0217686779856555	0.0527818480087459	0.0383368411702942
535	4 vs. 39	1	0.9994	0.9994	0.0204	0.9714	0.0278	1	0.998942612244898	0.998988244897959	0.0261798367346939	0.973154367346939	0.0477981224489796	1	0.000443190711999786	0.000438776826387494	0.00526656986503144	0.0241848423728632	0.0280526463759508
536	4 vs. 39	2	0.9985	0.9986	0.0241	0.9677	0.1389	2	0.997084244897959	0.997079102040816	0.0320324897959184	0.98314506122449	0.13334	2	0.00167378038871567	0.00167997748687571	0.00839505607048402	0.0172091595875419	0.019070642667847
537	4 vs. 39	3	0.9944	0.9924	0.0347	0.9565	0.3611	3	0.978327836734694	0.963547755102041	0.0622181224489796	0.938534775510204	0.40110987755102	3	0.0162470837193968	0.0272804614226038	0.0217686779856555	0.0527818480087459	0.0383368411702942
538	4 vs. 40	1	0.9989	0.9989	0.0266	0.9714	0.0278	1	0.998942612244898	0.998988244897959	0.0261798367346939	0.973154367346939	0.0477981224489796	1	0.000443190711999786	0.000438776826387494	0.00526656986503144	0.0241848423728632	0.0280526463759508
539	4 vs. 40	2	0.9984	0.9984	0.0262	1	0.1111	2	0.997084244897959	0.997079102040816	0.0320324897959184	0.98314506122449	0.13334	2	0.00167378038871567	0.00167997748687571	0.00839505607048402	0.0172091595875419	0.019070642667847
540	4 vs. 40	3	0.9809	0.9688	0.0625	0.8571	0.4167	3	0.978327836734694	0.963547755102041	0.0622181224489796	0.938534775510204	0.40110987755102	3	0.0162470837193968	0.0272804614226038	0.0217686779856555	0.0527818480087459	0.0383368411702942
541	4 vs. 41	1	0.9993	0.9994	0.021	1	0	1	0.998942612244898	0.998988244897959	0.0261798367346939	0.973154367346939	0.0477981224489796	1	0.000443190711999786	0.000438776826387494	0.00526656986503144	0.0241848423728632	0.0280526463759508
542	4 vs. 41	2	0.9969	0.9968	0.0326	0.9677	0.1389	2	0.997084244897959	0.997079102040816	0.0320324897959184	0.98314506122449	0.13334	2	0.00167378038871567	0.00167997748687571	0.00839505607048402	0.0172091595875419	0.019070642667847
543	4 vs. 41	3	0.9927	0.9898	0.0394	1	0.3333	3	0.978327836734694	0.963547755102041	0.0622181224489796	0.938534775510204	0.40110987755102	3	0.0162470837193968	0.0272804614226038	0.0217686779856555	0.0527818480087459	0.0383368411702942
544	4 vs. 42	1	0.9989	0.999	0.0282	1	0	1	0.998942612244898	0.998988244897959	0.0261798367346939	0.973154367346939	0.0477981224489796	1	0.000443190711999786	0.000438776826387494	0.00526656986503144	0.0241848423728632	0.0280526463759508
545	4 vs. 42	2	0.9935	0.9932	0.0503	1	0.1111	2	0.997084244897959	0.997079102040816	0.0320324897959184	0.98314506122449	0.13334	2	0.00167378038871567	0.00167997748687571	0.00839505607048402	0.0172091595875419	0.019070642667847
546	4 vs. 42	3	0.9837	0.9729	0.0579	0.9091	0.3889	3	0.978327836734694	0.963547755102041	0.0622181224489796	0.938534775510204	0.40110987755102	3	0.0162470837193968	0.0272804614226038	0.0217686779856555	0.0527818480087459	0.0383368411702942
547	4 vs. 43	1	0.9993	0.9993	0.0212	0.9714	0.0278	1	0.998942612244898	0.998988244897959	0.0261798367346939	0.973154367346939	0.0477981224489796	1	0.000443190711999786	0.000438776826387494	0.00526656986503144	0.0241848423728632	0.0280526463759508
548	4 vs. 43	2	0.9988	0.9989	0.0237	1	0.1111	2	0.997084244897959	0.997079102040816	0.0320324897959184	0.98314506122449	0.13334	2	0.00167378038871567	0.00167997748687571	0.00839505607048402	0.0172091595875419	0.019070642667847
549	4 vs. 43	3	0.977	0.9684	0.0686	0.8571	0.4167	3	0.978327836734694	0.963547755102041	0.0622181224489796	0.938534775510204	0.40110987755102	3	0.0162470837193968	0.0272804614226038	0.0217686779856555	0.0527818480087459	0.0383368411702942
550	4 vs. 44	1	0.9992	0.9992	0.0244	0.9714	0.0278	1	0.998942612244898	0.998988244897959	0.0261798367346939	0.973154367346939	0.0477981224489796	1	0.000443190711999786	0.000438776826387494	0.00526656986503144	0.0241848423728632	0.0280526463759508
551	4 vs. 44	2	0.9983	0.9983	0.0242	1	0.1111	2	0.997084244897959	0.997079102040816	0.0320324897959184	0.98314506122449	0.13334	2	0.00167378038871567	0.00167997748687571	0.00839505607048402	0.0172091595875419	0.019070642667847
552	4 vs. 44	3	0.9859	0.9766	0.0538	0.9565	0.3611	3	0.978327836734694	0.963547755102041	0.0622181224489796	0.938534775510204	0.40110987755102	3	0.0162470837193968	0.0272804614226038	0.0217686779856555	0.0527818480087459	0.0383368411702942
553	4 vs. 45	1	0.999	0.999	0.0254	0.9714	0.0278	1	0.998942612244898	0.998988244897959	0.0261798367346939	0.973154367346939	0.0477981224489796	1	0.000443190711999786	0.000438776826387494	0.00526656986503144	0.0241848423728632	0.0280526463759508
554	4 vs. 45	2	0.9988	0.9987	0.0272	1	0.1111	2	0.997084244897959	0.997079102040816	0.0320324897959184	0.98314506122449	0.13334	2	0.00167378038871567	0.00167997748687571	0.00839505607048402	0.0172091595875419	0.019070642667847
555	4 vs. 45	3	0.9911	0.9896	0.0429	0.9565	0.3611	3	0.978327836734694	0.963547755102041	0.0622181224489796	0.938534775510204	0.40110987755102	3	0.0162470837193968	0.0272804614226038	0.0217686779856555	0.0527818480087459	0.0383368411702942
556	4 vs. 46	1	0.9995	0.9995	0.0174	0.9412	0.0556	1	0.998942612244898	0.998988244897959	0.0261798367346939	0.973154367346939	0.0477981224489796	1	0.000443190711999786	0.000438776826387494	0.00526656986503144	0.0241848423728632	0.0280526463759508
557	4 vs. 46	2	0.9983	0.9983	0.0265	0.9677	0.1389	2	0.997084244897959	0.997079102040816	0.0320324897959184	0.98314506122449	0.13334	2	0.00167378038871567	0.00167997748687571	0.00839505607048402	0.0172091595875419	0.019070642667847
558	4 vs. 46	3	0.9847	0.9769	0.0561	0.9091	0.3889	3	0.978327836734694	0.963547755102041	0.0622181224489796	0.938534775510204	0.40110987755102	3	0.0162470837193968	0.0272804614226038	0.0217686779856555	0.0527818480087459	0.0383368411702942
559	4 vs. 47	1	0.9994	0.9994	0.0199	0.9714	0.0278	1	0.998942612244898	0.998988244897959	0.0261798367346939	0.973154367346939	0.0477981224489796	1	0.000443190711999786	0.000438776826387494	0.00526656986503144	0.0241848423728632	0.0280526463759508
560	4 vs. 47	2	0.9993	0.9993	0.0176	0.9677	0.1389	2	0.997084244897959	0.997079102040816	0.0320324897959184	0.98314506122449	0.13334	2	0.00167378038871567	0.00167997748687571	0.00839505607048402	0.0172091595875419	0.019070642667847
561	4 vs. 47	3	0.9926	0.9895	0.0392	0.9565	0.3611	3	0.978327836734694	0.963547755102041	0.0622181224489796	0.938534775510204	0.40110987755102	3	0.0162470837193968	0.0272804614226038	0.0217686779856555	0.0527818480087459	0.0383368411702942
562	4 vs. 48	1	0.9994	0.9995	0.019	0.9714	0.0278	1	0.998942612244898	0.998988244897959	0.0261798367346939	0.973154367346939	0.0477981224489796	1	0.000443190711999786	0.000438776826387494	0.00526656986503144	0.0241848423728632	0.0280526463759508
563	4 vs. 48	2	0.9969	0.9969	0.0323	1	0.1111	2	0.997084244897959	0.997079102040816	0.0320324897959184	0.98314506122449	0.13334	2	0.00167378038871567	0.00167997748687571	0.00839505607048402	0.0172091595875419	0.019070642667847
564	4 vs. 48	3	0.9946	0.9918	0.0349	0.9565	0.3611	3	0.978327836734694	0.963547755102041	0.0622181224489796	0.938534775510204	0.40110987755102	3	0.0162470837193968	0.0272804614226038	0.0217686779856555	0.0527818480087459	0.0383368411702942
565	4 vs. 49	1	0.9991	0.9992	0.0232	1	0	1	0.998942612244898	0.998988244897959	0.0261798367346939	0.973154367346939	0.0477981224489796	1	0.000443190711999786	0.000438776826387494	0.00526656986503144	0.0241848423728632	0.0280526463759508
566	4 vs. 49	2	0.9986	0.9986	0.0215	0.9677	0.1389	2	0.997084244897959	0.997079102040816	0.0320324897959184	0.98314506122449	0.13334	2	0.00167378038871567	0.00167997748687571	0.00839505607048402	0.0172091595875419	0.019070642667847
567	4 vs. 49	3	0.987	0.979	0.0522	0.9565	0.3611	3	0.978327836734694	0.963547755102041	0.0622181224489796	0.938534775510204	0.40110987755102	3	0.0162470837193968	0.0272804614226038	0.0217686779856555	0.0527818480087459	0.0383368411702942
568	4 vs. 50	1	0.9989	0.9992	0.0264	0.9091	0.0833	1	0.998942612244898	0.998988244897959	0.0261798367346939	0.973154367346939	0.0477981224489796	1	0.000443190711999786	0.000438776826387494	0.00526656986503144	0.0241848423728632	0.0280526463759508
569	4 vs. 50	2	0.9966	0.9964	0.0369	1	0.1111	2	0.997084244897959	0.997079102040816	0.0320324897959184	0.98314506122449	0.13334	2	0.00167378038871567	0.00167997748687571	0.00839505607048402	0.0172091595875419	0.019070642667847
570	4 vs. 50	3	0.9815	0.9729	0.0616	0.9091	0.3889	3	0.978327836734694	0.963547755102041	0.0622181224489796	0.938534775510204	0.40110987755102	3	0.0162470837193968	0.0272804614226038	0.0217686779856555	0.0527818480087459	0.0383368411702942
571	5 vs. 6	1	0.9992	0.9992	0.023	1	0.0556	1	0.998942612244898	0.998988244897959	0.0261798367346939	0.973154367346939	0.0477981224489796	1	0.000443190711999786	0.000438776826387494	0.00526656986503144	0.0241848423728632	0.0280526463759508
572	5 vs. 6	2	0.9991	0.9991	0.02	1	0.1111	2	0.997084244897959	0.997079102040816	0.0320324897959184	0.98314506122449	0.13334	2	0.00167378038871567	0.00167997748687571	0.00839505607048402	0.0172091595875419	0.019070642667847
573	5 vs. 6	3	0.9663	0.9498	0.0812	0.9091	0.3889	3	0.978327836734694	0.963547755102041	0.0622181224489796	0.938534775510204	0.40110987755102	3	0.0162470837193968	0.0272804614226038	0.0217686779856555	0.0527818480087459	0.0383368411702942
574	5 vs. 7	1	0.9994	0.9994	0.019	1	0.0556	1	0.998942612244898	0.998988244897959	0.0261798367346939	0.973154367346939	0.0477981224489796	1	0.000443190711999786	0.000438776826387494	0.00526656986503144	0.0241848423728632	0.0280526463759508
575	5 vs. 7	2	0.9985	0.9985	0.0228	0.9677	0.1389	2	0.997084244897959	0.997079102040816	0.0320324897959184	0.98314506122449	0.13334	2	0.00167378038871567	0.00167997748687571	0.00839505607048402	0.0172091595875419	0.019070642667847
576	5 vs. 7	3	0.9837	0.9726	0.0588	0.9524	0.4167	3	0.978327836734694	0.963547755102041	0.0622181224489796	0.938534775510204	0.40110987755102	3	0.0162470837193968	0.0272804614226038	0.0217686779856555	0.0527818480087459	0.0383368411702942
577	5 vs. 8	1	0.9992	0.9993	0.0219	1	0.0556	1	0.998942612244898	0.998988244897959	0.0261798367346939	0.973154367346939	0.0477981224489796	1	0.000443190711999786	0.000438776826387494	0.00526656986503144	0.0241848423728632	0.0280526463759508
578	5 vs. 8	2	0.9973	0.9978	0.0308	0.9677	0.1389	2	0.997084244897959	0.997079102040816	0.0320324897959184	0.98314506122449	0.13334	2	0.00167378038871567	0.00167997748687571	0.00839505607048402	0.0172091595875419	0.019070642667847
579	5 vs. 8	3	0.9672	0.9364	0.0802	0.8571	0.4167	3	0.978327836734694	0.963547755102041	0.0622181224489796	0.938534775510204	0.40110987755102	3	0.0162470837193968	0.0272804614226038	0.0217686779856555	0.0527818480087459	0.0383368411702942
580	5 vs. 9	1	0.9978	0.9979	0.0369	0.9714	0.0278	1	0.998942612244898	0.998988244897959	0.0261798367346939	0.973154367346939	0.0477981224489796	1	0.000443190711999786	0.000438776826387494	0.00526656986503144	0.0241848423728632	0.0280526463759508
581	5 vs. 9	2	0.9979	0.9978	0.0273	1	0.1111	2	0.997084244897959	0.997079102040816	0.0320324897959184	0.98314506122449	0.13334	2	0.00167378038871567	0.00167997748687571	0.00839505607048402	0.0172091595875419	0.019070642667847
582	5 vs. 9	3	0.9857	0.9749	0.0546	0.9524	0.4167	3	0.978327836734694	0.963547755102041	0.0622181224489796	0.938534775510204	0.40110987755102	3	0.0162470837193968	0.0272804614226038	0.0217686779856555	0.0527818480087459	0.0383368411702942
583	5 vs. 10	1	0.9983	0.9984	0.0334	0.9697	0.0833	1	0.998942612244898	0.998988244897959	0.0261798367346939	0.973154367346939	0.0477981224489796	1	0.000443190711999786	0.000438776826387494	0.00526656986503144	0.0241848423728632	0.0280526463759508
584	5 vs. 10	2	0.9975	0.9974	0.0304	0.9677	0.1389	2	0.997084244897959	0.997079102040816	0.0320324897959184	0.98314506122449	0.13334	2	0.00167378038871567	0.00167997748687571	0.00839505607048402	0.0172091595875419	0.019070642667847
585	5 vs. 10	3	0.9873	0.9769	0.0509	1	0.4444	3	0.978327836734694	0.963547755102041	0.0622181224489796	0.938534775510204	0.40110987755102	3	0.0162470837193968	0.0272804614226038	0.0217686779856555	0.0527818480087459	0.0383368411702942
586	5 vs. 11	1	0.9991	0.9991	0.0247	1	0.0556	1	0.998942612244898	0.998988244897959	0.0261798367346939	0.973154367346939	0.0477981224489796	1	0.000443190711999786	0.000438776826387494	0.00526656986503144	0.0241848423728632	0.0280526463759508
587	5 vs. 11	2	0.9979	0.9979	0.0275	0.9677	0.1389	2	0.997084244897959	0.997079102040816	0.0320324897959184	0.98314506122449	0.13334	2	0.00167378038871567	0.00167997748687571	0.00839505607048402	0.0172091595875419	0.019070642667847
588	5 vs. 11	3	0.9498	0.9277	0.0983	0.9091	0.3889	3	0.978327836734694	0.963547755102041	0.0622181224489796	0.938534775510204	0.40110987755102	3	0.0162470837193968	0.0272804614226038	0.0217686779856555	0.0527818480087459	0.0383368411702942
589	5 vs. 12	1	0.9983	0.9983	0.0327	0.9714	0.0278	1	0.998942612244898	0.998988244897959	0.0261798367346939	0.973154367346939	0.0477981224489796	1	0.000443190711999786	0.000438776826387494	0.00526656986503144	0.0241848423728632	0.0280526463759508
590	5 vs. 12	2	0.9987	0.9987	0.0216	0.9677	0.1389	2	0.997084244897959	0.997079102040816	0.0320324897959184	0.98314506122449	0.13334	2	0.00167378038871567	0.00167997748687571	0.00839505607048402	0.0172091595875419	0.019070642667847
591	5 vs. 12	3	0.9773	0.9576	0.0661	0.9474	0.4722	3	0.978327836734694	0.963547755102041	0.0622181224489796	0.938534775510204	0.40110987755102	3	0.0162470837193968	0.0272804614226038	0.0217686779856555	0.0527818480087459	0.0383368411702942
592	5 vs. 13	1	0.9984	0.9984	0.0326	0.9412	0.0556	1	0.998942612244898	0.998988244897959	0.0261798367346939	0.973154367346939	0.0477981224489796	1	0.000443190711999786	0.000438776826387494	0.00526656986503144	0.0241848423728632	0.0280526463759508
593	5 vs. 13	2	0.9991	0.9991	0.0193	1	0.1111	2	0.997084244897959	0.997079102040816	0.0320324897959184	0.98314506122449	0.13334	2	0.00167378038871567	0.00167997748687571	0.00839505607048402	0.0172091595875419	0.019070642667847
594	5 vs. 13	3	0.9832	0.9781	0.0569	1	0.4444	3	0.978327836734694	0.963547755102041	0.0622181224489796	0.938534775510204	0.40110987755102	3	0.0162470837193968	0.0272804614226038	0.0217686779856555	0.0527818480087459	0.0383368411702942
595	5 vs. 14	1	0.9981	0.9982	0.0343	0.9714	0.0278	1	0.998942612244898	0.998988244897959	0.0261798367346939	0.973154367346939	0.0477981224489796	1	0.000443190711999786	0.000438776826387494	0.00526656986503144	0.0241848423728632	0.0280526463759508
596	5 vs. 14	2	0.9981	0.998	0.0261	1	0.1111	2	0.997084244897959	0.997079102040816	0.0320324897959184	0.98314506122449	0.13334	2	0.00167378038871567	0.00167997748687571	0.00839505607048402	0.0172091595875419	0.019070642667847
597	5 vs. 14	3	0.9842	0.978	0.056	0.9091	0.3889	3	0.978327836734694	0.963547755102041	0.0622181224489796	0.938534775510204	0.40110987755102	3	0.0162470837193968	0.0272804614226038	0.0217686779856555	0.0527818480087459	0.0383368411702942
598	5 vs. 15	1	0.9982	0.9982	0.0334	0.9412	0.0556	1	0.998942612244898	0.998988244897959	0.0261798367346939	0.973154367346939	0.0477981224489796	1	0.000443190711999786	0.000438776826387494	0.00526656986503144	0.0241848423728632	0.0280526463759508
599	5 vs. 15	2	0.9979	0.9981	0.0276	0.9677	0.1389	2	0.997084244897959	0.997079102040816	0.0320324897959184	0.98314506122449	0.13334	2	0.00167378038871567	0.00167997748687571	0.00839505607048402	0.0172091595875419	0.019070642667847
600	5 vs. 15	3	0.9876	0.9755	0.0498	0.9524	0.4167	3	0.978327836734694	0.963547755102041	0.0622181224489796	0.938534775510204	0.40110987755102	3	0.0162470837193968	0.0272804614226038	0.0217686779856555	0.0527818480087459	0.0383368411702942
601	5 vs. 16	1	0.999	0.9991	0.0252	1	0.0556	1	0.998942612244898	0.998988244897959	0.0261798367346939	0.973154367346939	0.0477981224489796	1	0.000443190711999786	0.000438776826387494	0.00526656986503144	0.0241848423728632	0.0280526463759508
602	5 vs. 16	2	0.9969	0.9968	0.0341	1	0.1111	2	0.997084244897959	0.997079102040816	0.0320324897959184	0.98314506122449	0.13334	2	0.00167378038871567	0.00167997748687571	0.00839505607048402	0.0172091595875419	0.019070642667847
603	5 vs. 16	3	0.9734	0.9671	0.0723	0.9091	0.3889	3	0.978327836734694	0.963547755102041	0.0622181224489796	0.938534775510204	0.40110987755102	3	0.0162470837193968	0.0272804614226038	0.0217686779856555	0.0527818480087459	0.0383368411702942
604	5 vs. 17	1	0.9987	0.9987	0.0296	1	0.0556	1	0.998942612244898	0.998988244897959	0.0261798367346939	0.973154367346939	0.0477981224489796	1	0.000443190711999786	0.000438776826387494	0.00526656986503144	0.0241848423728632	0.0280526463759508
605	5 vs. 17	2	0.9974	0.9973	0.0305	1	0.1111	2	0.997084244897959	0.997079102040816	0.0320324897959184	0.98314506122449	0.13334	2	0.00167378038871567	0.00167997748687571	0.00839505607048402	0.0172091595875419	0.019070642667847
606	5 vs. 17	3	0.9865	0.9738	0.0514	0.9524	0.4167	3	0.978327836734694	0.963547755102041	0.0622181224489796	0.938534775510204	0.40110987755102	3	0.0162470837193968	0.0272804614226038	0.0217686779856555	0.0527818480087459	0.0383368411702942
607	5 vs. 18	1	0.999	0.999	0.0278	1	0.0556	1	0.998942612244898	0.998988244897959	0.0261798367346939	0.973154367346939	0.0477981224489796	1	0.000443190711999786	0.000438776826387494	0.00526656986503144	0.0241848423728632	0.0280526463759508
608	5 vs. 18	2	0.9959	0.9963	0.0382	0.9677	0.1389	2	0.997084244897959	0.997079102040816	0.0320324897959184	0.98314506122449	0.13334	2	0.00167378038871567	0.00167997748687571	0.00839505607048402	0.0172091595875419	0.019070642667847
609	5 vs. 18	3	0.9907	0.9816	0.0444	0.9524	0.4167	3	0.978327836734694	0.963547755102041	0.0622181224489796	0.938534775510204	0.40110987755102	3	0.0162470837193968	0.0272804614226038	0.0217686779856555	0.0527818480087459	0.0383368411702942
610	5 vs. 19	1	0.9988	0.9987	0.0283	1	0.0556	1	0.998942612244898	0.998988244897959	0.0261798367346939	0.973154367346939	0.0477981224489796	1	0.000443190711999786	0.000438776826387494	0.00526656986503144	0.0241848423728632	0.0280526463759508
611	5 vs. 19	2	0.9982	0.9982	0.0252	1	0.1111	2	0.997084244897959	0.997079102040816	0.0320324897959184	0.98314506122449	0.13334	2	0.00167378038871567	0.00167997748687571	0.00839505607048402	0.0172091595875419	0.019070642667847
612	5 vs. 19	3	0.9577	0.9566	0.094	0.8696	0.3611	3	0.978327836734694	0.963547755102041	0.0622181224489796	0.938534775510204	0.40110987755102	3	0.0162470837193968	0.0272804614226038	0.0217686779856555	0.0527818480087459	0.0383368411702942
613	5 vs. 20	1	0.9988	0.9988	0.029	0.9714	0.0278	1	0.998942612244898	0.998988244897959	0.0261798367346939	0.973154367346939	0.0477981224489796	1	0.000443190711999786	0.000438776826387494	0.00526656986503144	0.0241848423728632	0.0280526463759508
614	5 vs. 20	2	0.9978	0.9977	0.0286	1	0.1111	2	0.997084244897959	0.997079102040816	0.0320324897959184	0.98314506122449	0.13334	2	0.00167378038871567	0.00167997748687571	0.00839505607048402	0.0172091595875419	0.019070642667847
615	5 vs. 20	3	0.9914	0.9829	0.0416	0.9091	0.3889	3	0.978327836734694	0.963547755102041	0.0622181224489796	0.938534775510204	0.40110987755102	3	0.0162470837193968	0.0272804614226038	0.0217686779856555	0.0527818480087459	0.0383368411702942
616	5 vs. 21	1	0.9983	0.9983	0.0344	0.9714	0.0278	1	0.998942612244898	0.998988244897959	0.0261798367346939	0.973154367346939	0.0477981224489796	1	0.000443190711999786	0.000438776826387494	0.00526656986503144	0.0241848423728632	0.0280526463759508
617	5 vs. 21	2	0.9976	0.9975	0.0305	1	0.1111	2	0.997084244897959	0.997079102040816	0.0320324897959184	0.98314506122449	0.13334	2	0.00167378038871567	0.00167997748687571	0.00839505607048402	0.0172091595875419	0.019070642667847
618	5 vs. 21	3	0.9904	0.9819	0.0455	0.9524	0.4167	3	0.978327836734694	0.963547755102041	0.0622181224489796	0.938534775510204	0.40110987755102	3	0.0162470837193968	0.0272804614226038	0.0217686779856555	0.0527818480087459	0.0383368411702942
619	5 vs. 22	1	0.998	0.9981	0.035	1	0.0556	1	0.998942612244898	0.998988244897959	0.0261798367346939	0.973154367346939	0.0477981224489796	1	0.000443190711999786	0.000438776826387494	0.00526656986503144	0.0241848423728632	0.0280526463759508
620	5 vs. 22	2	0.9975	0.9974	0.0302	1	0.1111	2	0.997084244897959	0.997079102040816	0.0320324897959184	0.98314506122449	0.13334	2	0.00167378038871567	0.00167997748687571	0.00839505607048402	0.0172091595875419	0.019070642667847
621	5 vs. 22	3	0.9883	0.9836	0.048	0.9524	0.4167	3	0.978327836734694	0.963547755102041	0.0622181224489796	0.938534775510204	0.40110987755102	3	0.0162470837193968	0.0272804614226038	0.0217686779856555	0.0527818480087459	0.0383368411702942
622	5 vs. 23	1	0.9983	0.9984	0.0333	1	0.0556	1	0.998942612244898	0.998988244897959	0.0261798367346939	0.973154367346939	0.0477981224489796	1	0.000443190711999786	0.000438776826387494	0.00526656986503144	0.0241848423728632	0.0280526463759508
623	5 vs. 23	2	0.9987	0.9987	0.0231	1	0.1111	2	0.997084244897959	0.997079102040816	0.0320324897959184	0.98314506122449	0.13334	2	0.00167378038871567	0.00167997748687571	0.00839505607048402	0.0172091595875419	0.019070642667847
624	5 vs. 23	3	0.9964	0.9927	0.0269	0.9524	0.4167	3	0.978327836734694	0.963547755102041	0.0622181224489796	0.938534775510204	0.40110987755102	3	0.0162470837193968	0.0272804614226038	0.0217686779856555	0.0527818480087459	0.0383368411702942
625	5 vs. 24	1	0.999	0.999	0.0261	0.9714	0.0278	1	0.998942612244898	0.998988244897959	0.0261798367346939	0.973154367346939	0.0477981224489796	1	0.000443190711999786	0.000438776826387494	0.00526656986503144	0.0241848423728632	0.0280526463759508
626	5 vs. 24	2	0.9993	0.9993	0.0159	0.9677	0.1389	2	0.997084244897959	0.997079102040816	0.0320324897959184	0.98314506122449	0.13334	2	0.00167378038871567	0.00167997748687571	0.00839505607048402	0.0172091595875419	0.019070642667847
627	5 vs. 24	3	0.986	0.9762	0.0522	0.9524	0.4167	3	0.978327836734694	0.963547755102041	0.0622181224489796	0.938534775510204	0.40110987755102	3	0.0162470837193968	0.0272804614226038	0.0217686779856555	0.0527818480087459	0.0383368411702942
628	5 vs. 25	1	0.9989	0.9989	0.0269	0.9714	0.0278	1	0.998942612244898	0.998988244897959	0.0261798367346939	0.973154367346939	0.0477981224489796	1	0.000443190711999786	0.000438776826387494	0.00526656986503144	0.0241848423728632	0.0280526463759508
629	5 vs. 25	2	0.9991	0.9991	0.0179	0.9677	0.1389	2	0.997084244897959	0.997079102040816	0.0320324897959184	0.98314506122449	0.13334	2	0.00167378038871567	0.00167997748687571	0.00839505607048402	0.0172091595875419	0.019070642667847
630	5 vs. 25	3	0.9899	0.9808	0.0483	0.9524	0.4167	3	0.978327836734694	0.963547755102041	0.0622181224489796	0.938534775510204	0.40110987755102	3	0.0162470837193968	0.0272804614226038	0.0217686779856555	0.0527818480087459	0.0383368411702942
631	5 vs. 26	1	0.9994	0.9994	0.0204	0.9714	0.0278	1	0.998942612244898	0.998988244897959	0.0261798367346939	0.973154367346939	0.0477981224489796	1	0.000443190711999786	0.000438776826387494	0.00526656986503144	0.0241848423728632	0.0280526463759508
632	5 vs. 26	2	0.9979	0.9978	0.0279	0.9677	0.1389	2	0.997084244897959	0.997079102040816	0.0320324897959184	0.98314506122449	0.13334	2	0.00167378038871567	0.00167997748687571	0.00839505607048402	0.0172091595875419	0.019070642667847
633	5 vs. 26	3	0.9911	0.9839	0.0449	0.9524	0.4167	3	0.978327836734694	0.963547755102041	0.0622181224489796	0.938534775510204	0.40110987755102	3	0.0162470837193968	0.0272804614226038	0.0217686779856555	0.0527818480087459	0.0383368411702942
634	5 vs. 27	1	0.9975	0.9975	0.0398	0.9697	0.0833	1	0.998942612244898	0.998988244897959	0.0261798367346939	0.973154367346939	0.0477981224489796	1	0.000443190711999786	0.000438776826387494	0.00526656986503144	0.0241848423728632	0.0280526463759508
635	5 vs. 27	2	0.9966	0.9967	0.0354	1	0.1111	2	0.997084244897959	0.997079102040816	0.0320324897959184	0.98314506122449	0.13334	2	0.00167378038871567	0.00167997748687571	0.00839505607048402	0.0172091595875419	0.019070642667847
636	5 vs. 27	3	0.9566	0.94	0.0914	0.8421	0.4722	3	0.978327836734694	0.963547755102041	0.0622181224489796	0.938534775510204	0.40110987755102	3	0.0162470837193968	0.0272804614226038	0.0217686779856555	0.0527818480087459	0.0383368411702942
637	5 vs. 28	1	0.9978	0.998	0.0376	0.9714	0.0278	1	0.998942612244898	0.998988244897959	0.0261798367346939	0.973154367346939	0.0477981224489796	1	0.000443190711999786	0.000438776826387494	0.00526656986503144	0.0241848423728632	0.0280526463759508
638	5 vs. 28	2	0.9961	0.9963	0.0373	1	0.1111	2	0.997084244897959	0.997079102040816	0.0320324897959184	0.98314506122449	0.13334	2	0.00167378038871567	0.00167997748687571	0.00839505607048402	0.0172091595875419	0.019070642667847
639	5 vs. 28	3	0.9931	0.9879	0.0365	0.9	0.4444	3	0.978327836734694	0.963547755102041	0.0622181224489796	0.938534775510204	0.40110987755102	3	0.0162470837193968	0.0272804614226038	0.0217686779856555	0.0527818480087459	0.0383368411702942
640	5 vs. 29	1	0.9989	0.9989	0.0262	1	0.0556	1	0.998942612244898	0.998988244897959	0.0261798367346939	0.973154367346939	0.0477981224489796	1	0.000443190711999786	0.000438776826387494	0.00526656986503144	0.0241848423728632	0.0280526463759508
641	5 vs. 29	2	0.9988	0.9988	0.0209	1	0.1111	2	0.997084244897959	0.997079102040816	0.0320324897959184	0.98314506122449	0.13334	2	0.00167378038871567	0.00167997748687571	0.00839505607048402	0.0172091595875419	0.019070642667847
642	5 vs. 29	3	0.9685	0.9549	0.0779	0.9524	0.4167	3	0.978327836734694	0.963547755102041	0.0622181224489796	0.938534775510204	0.40110987755102	3	0.0162470837193968	0.0272804614226038	0.0217686779856555	0.0527818480087459	0.0383368411702942
643	5 vs. 30	1	0.9991	0.9993	0.0238	0.9714	0.0278	1	0.998942612244898	0.998988244897959	0.0261798367346939	0.973154367346939	0.0477981224489796	1	0.000443190711999786	0.000438776826387494	0.00526656986503144	0.0241848423728632	0.0280526463759508
644	5 vs. 30	2	0.9986	0.9986	0.0232	0.9677	0.1389	2	0.997084244897959	0.997079102040816	0.0320324897959184	0.98314506122449	0.13334	2	0.00167378038871567	0.00167997748687571	0.00839505607048402	0.0172091595875419	0.019070642667847
645	5 vs. 30	3	0.9854	0.9721	0.0532	0.9474	0.4722	3	0.978327836734694	0.963547755102041	0.0622181224489796	0.938534775510204	0.40110987755102	3	0.0162470837193968	0.0272804614226038	0.0217686779856555	0.0527818480087459	0.0383368411702942
646	5 vs. 31	1	0.9985	0.9985	0.0323	0.9412	0.0556	1	0.998942612244898	0.998988244897959	0.0261798367346939	0.973154367346939	0.0477981224489796	1	0.000443190711999786	0.000438776826387494	0.00526656986503144	0.0241848423728632	0.0280526463759508
647	5 vs. 31	2	0.9989	0.9989	0.0211	1	0.1111	2	0.997084244897959	0.997079102040816	0.0320324897959184	0.98314506122449	0.13334	2	0.00167378038871567	0.00167997748687571	0.00839505607048402	0.0172091595875419	0.019070642667847
648	5 vs. 31	3	0.9749	0.9574	0.0697	1	0.4444	3	0.978327836734694	0.963547755102041	0.0622181224489796	0.938534775510204	0.40110987755102	3	0.0162470837193968	0.0272804614226038	0.0217686779856555	0.0527818480087459	0.0383368411702942
649	5 vs. 32	1	0.9988	0.9988	0.0277	1	0.0556	1	0.998942612244898	0.998988244897959	0.0261798367346939	0.973154367346939	0.0477981224489796	1	0.000443190711999786	0.000438776826387494	0.00526656986503144	0.0241848423728632	0.0280526463759508
650	5 vs. 32	2	0.9973	0.9972	0.0336	1	0.1111	2	0.997084244897959	0.997079102040816	0.0320324897959184	0.98314506122449	0.13334	2	0.00167378038871567	0.00167997748687571	0.00839505607048402	0.0172091595875419	0.019070642667847
651	5 vs. 32	3	0.9815	0.9737	0.0602	0.9091	0.3889	3	0.978327836734694	0.963547755102041	0.0622181224489796	0.938534775510204	0.40110987755102	3	0.0162470837193968	0.0272804614226038	0.0217686779856555	0.0527818480087459	0.0383368411702942
652	5 vs. 33	1	0.9984	0.9986	0.0317	0.9375	0.1111	1	0.998942612244898	0.998988244897959	0.0261798367346939	0.973154367346939	0.0477981224489796	1	0.000443190711999786	0.000438776826387494	0.00526656986503144	0.0241848423728632	0.0280526463759508
653	5 vs. 33	2	0.9957	0.9956	0.039	0.9677	0.1389	2	0.997084244897959	0.997079102040816	0.0320324897959184	0.98314506122449	0.13334	2	0.00167378038871567	0.00167997748687571	0.00839505607048402	0.0172091595875419	0.019070642667847
654	5 vs. 33	3	0.9935	0.9874	0.0355	0.9474	0.4722	3	0.978327836734694	0.963547755102041	0.0622181224489796	0.938534775510204	0.40110987755102	3	0.0162470837193968	0.0272804614226038	0.0217686779856555	0.0527818480087459	0.0383368411702942
655	5 vs. 34	1	0.9987	0.9988	0.0289	1	0.0556	1	0.998942612244898	0.998988244897959	0.0261798367346939	0.973154367346939	0.0477981224489796	1	0.000443190711999786	0.000438776826387494	0.00526656986503144	0.0241848423728632	0.0280526463759508
656	5 vs. 34	2	0.9976	0.9976	0.0291	1	0.1111	2	0.997084244897959	0.997079102040816	0.0320324897959184	0.98314506122449	0.13334	2	0.00167378038871567	0.00167997748687571	0.00839505607048402	0.0172091595875419	0.019070642667847
657	5 vs. 34	3	0.9866	0.9787	0.0512	0.9524	0.4167	3	0.978327836734694	0.963547755102041	0.0622181224489796	0.938534775510204	0.40110987755102	3	0.0162470837193968	0.0272804614226038	0.0217686779856555	0.0527818480087459	0.0383368411702942
658	5 vs. 35	1	0.9988	0.9988	0.0282	1	0.0556	1	0.998942612244898	0.998988244897959	0.0261798367346939	0.973154367346939	0.0477981224489796	1	0.000443190711999786	0.000438776826387494	0.00526656986503144	0.0241848423728632	0.0280526463759508
659	5 vs. 35	2	0.9967	0.9966	0.0355	0.9677	0.1389	2	0.997084244897959	0.997079102040816	0.0320324897959184	0.98314506122449	0.13334	2	0.00167378038871567	0.00167997748687571	0.00839505607048402	0.0172091595875419	0.019070642667847
660	5 vs. 35	3	0.9809	0.9704	0.0609	0.9524	0.4167	3	0.978327836734694	0.963547755102041	0.0622181224489796	0.938534775510204	0.40110987755102	3	0.0162470837193968	0.0272804614226038	0.0217686779856555	0.0527818480087459	0.0383368411702942
661	5 vs. 36	1	0.9982	0.9982	0.0337	1	0.0556	1	0.998942612244898	0.998988244897959	0.0261798367346939	0.973154367346939	0.0477981224489796	1	0.000443190711999786	0.000438776826387494	0.00526656986503144	0.0241848423728632	0.0280526463759508
662	5 vs. 36	2	0.9962	0.9961	0.0378	1	0.1111	2	0.997084244897959	0.997079102040816	0.0320324897959184	0.98314506122449	0.13334	2	0.00167378038871567	0.00167997748687571	0.00839505607048402	0.0172091595875419	0.019070642667847
663	5 vs. 36	3	0.9783	0.9657	0.0647	0.9091	0.3889	3	0.978327836734694	0.963547755102041	0.0622181224489796	0.938534775510204	0.40110987755102	3	0.0162470837193968	0.0272804614226038	0.0217686779856555	0.0527818480087459	0.0383368411702942
664	5 vs. 37	1	0.9985	0.9986	0.0307	0.9697	0.0833	1	0.998942612244898	0.998988244897959	0.0261798367346939	0.973154367346939	0.0477981224489796	1	0.000443190711999786	0.000438776826387494	0.00526656986503144	0.0241848423728632	0.0280526463759508
665	5 vs. 37	2	0.9991	0.9991	0.0177	0.9677	0.1389	2	0.997084244897959	0.997079102040816	0.0320324897959184	0.98314506122449	0.13334	2	0.00167378038871567	0.00167997748687571	0.00839505607048402	0.0172091595875419	0.019070642667847
666	5 vs. 37	3	0.9894	0.9801	0.0456	1	0.4444	3	0.978327836734694	0.963547755102041	0.0622181224489796	0.938534775510204	0.40110987755102	3	0.0162470837193968	0.0272804614226038	0.0217686779856555	0.0527818480087459	0.0383368411702942
667	5 vs. 38	1	0.9994	0.9994	0.0257	1	0.0556	1	0.998942612244898	0.998988244897959	0.0261798367346939	0.973154367346939	0.0477981224489796	1	0.000443190711999786	0.000438776826387494	0.00526656986503144	0.0241848423728632	0.0280526463759508
668	5 vs. 38	2	0.9986	0.9985	0.0228	1	0.1111	2	0.997084244897959	0.997079102040816	0.0320324897959184	0.98314506122449	0.13334	2	0.00167378038871567	0.00167997748687571	0.00839505607048402	0.0172091595875419	0.019070642667847
669	5 vs. 38	3	0.9839	0.9726	0.0559	0.9474	0.4722	3	0.978327836734694	0.963547755102041	0.0622181224489796	0.938534775510204	0.40110987755102	3	0.0162470837193968	0.0272804614226038	0.0217686779856555	0.0527818480087459	0.0383368411702942
670	5 vs. 39	1	0.9992	0.9991	0.0233	1	0.0556	1	0.998942612244898	0.998988244897959	0.0261798367346939	0.973154367346939	0.0477981224489796	1	0.000443190711999786	0.000438776826387494	0.00526656986503144	0.0241848423728632	0.0280526463759508
671	5 vs. 39	2	0.9982	0.9982	0.0251	0.9677	0.1389	2	0.997084244897959	0.997079102040816	0.0320324897959184	0.98314506122449	0.13334	2	0.00167378038871567	0.00167997748687571	0.00839505607048402	0.0172091595875419	0.019070642667847
672	5 vs. 39	3	0.9937	0.9924	0.035	0.9524	0.4167	3	0.978327836734694	0.963547755102041	0.0622181224489796	0.938534775510204	0.40110987755102	3	0.0162470837193968	0.0272804614226038	0.0217686779856555	0.0527818480087459	0.0383368411702942
673	5 vs. 40	1	0.9984	0.9984	0.0322	1	0.0556	1	0.998942612244898	0.998988244897959	0.0261798367346939	0.973154367346939	0.0477981224489796	1	0.000443190711999786	0.000438776826387494	0.00526656986503144	0.0241848423728632	0.0280526463759508
674	5 vs. 40	2	0.9985	0.9985	0.0233	1	0.1111	2	0.997084244897959	0.997079102040816	0.0320324897959184	0.98314506122449	0.13334	2	0.00167378038871567	0.00167997748687571	0.00839505607048402	0.0172091595875419	0.019070642667847
675	5 vs. 40	3	0.981	0.9683	0.0612	0.9474	0.4722	3	0.978327836734694	0.963547755102041	0.0622181224489796	0.938534775510204	0.40110987755102	3	0.0162470837193968	0.0272804614226038	0.0217686779856555	0.0527818480087459	0.0383368411702942
676	5 vs. 41	1	0.9982	0.9983	0.0341	0.9714	0.0278	1	0.998942612244898	0.998988244897959	0.0261798367346939	0.973154367346939	0.0477981224489796	1	0.000443190711999786	0.000438776826387494	0.00526656986503144	0.0241848423728632	0.0280526463759508
677	5 vs. 41	2	0.9965	0.9964	0.0352	0.9677	0.1389	2	0.997084244897959	0.997079102040816	0.0320324897959184	0.98314506122449	0.13334	2	0.00167378038871567	0.00167997748687571	0.00839505607048402	0.0172091595875419	0.019070642667847
678	5 vs. 41	3	0.9852	0.9755	0.0536	0.9091	0.3889	3	0.978327836734694	0.963547755102041	0.0622181224489796	0.938534775510204	0.40110987755102	3	0.0162470837193968	0.0272804614226038	0.0217686779856555	0.0527818480087459	0.0383368411702942
679	5 vs. 42	1	0.9988	0.9989	0.0291	0.9714	0.0278	1	0.998942612244898	0.998988244897959	0.0261798367346939	0.973154367346939	0.0477981224489796	1	0.000443190711999786	0.000438776826387494	0.00526656986503144	0.0241848423728632	0.0280526463759508
680	5 vs. 42	2	0.9941	0.9939	0.0465	1	0.1111	2	0.997084244897959	0.997079102040816	0.0320324897959184	0.98314506122449	0.13334	2	0.00167378038871567	0.00167997748687571	0.00839505607048402	0.0172091595875419	0.019070642667847
681	5 vs. 42	3	0.9809	0.9718	0.0609	1	0.4444	3	0.978327836734694	0.963547755102041	0.0622181224489796	0.938534775510204	0.40110987755102	3	0.0162470837193968	0.0272804614226038	0.0217686779856555	0.0527818480087459	0.0383368411702942
682	5 vs. 43	1	0.9991	0.9991	0.0235	1	0.0556	1	0.998942612244898	0.998988244897959	0.0261798367346939	0.973154367346939	0.0477981224489796	1	0.000443190711999786	0.000438776826387494	0.00526656986503144	0.0241848423728632	0.0280526463759508
683	5 vs. 43	2	0.9986	0.9986	0.023	1	0.1111	2	0.997084244897959	0.997079102040816	0.0320324897959184	0.98314506122449	0.13334	2	0.00167378038871567	0.00167997748687571	0.00839505607048402	0.0172091595875419	0.019070642667847
684	5 vs. 43	3	0.9925	0.9848	0.0381	0.9474	0.4722	3	0.978327836734694	0.963547755102041	0.0622181224489796	0.938534775510204	0.40110987755102	3	0.0162470837193968	0.0272804614226038	0.0217686779856555	0.0527818480087459	0.0383368411702942
685	5 vs. 44	1	0.9984	0.9984	0.0325	1	0.0556	1	0.998942612244898	0.998988244897959	0.0261798367346939	0.973154367346939	0.0477981224489796	1	0.000443190711999786	0.000438776826387494	0.00526656986503144	0.0241848423728632	0.0280526463759508
686	5 vs. 44	2	0.9978	0.9977	0.0279	1	0.1111	2	0.997084244897959	0.997079102040816	0.0320324897959184	0.98314506122449	0.13334	2	0.00167378038871567	0.00167997748687571	0.00839505607048402	0.0172091595875419	0.019070642667847
687	5 vs. 44	3	0.9708	0.9534	0.0758	0.9524	0.4167	3	0.978327836734694	0.963547755102041	0.0622181224489796	0.938534775510204	0.40110987755102	3	0.0162470837193968	0.0272804614226038	0.0217686779856555	0.0527818480087459	0.0383368411702942
688	5 vs. 45	1	0.9993	0.9993	0.021	1	0.0556	1	0.998942612244898	0.998988244897959	0.0261798367346939	0.973154367346939	0.0477981224489796	1	0.000443190711999786	0.000438776826387494	0.00526656986503144	0.0241848423728632	0.0280526463759508
689	5 vs. 45	2	0.9981	0.998	0.0278	1	0.1111	2	0.997084244897959	0.997079102040816	0.0320324897959184	0.98314506122449	0.13334	2	0.00167378038871567	0.00167997748687571	0.00839505607048402	0.0172091595875419	0.019070642667847
690	5 vs. 45	3	0.9923	0.9865	0.0387	0.9524	0.4167	3	0.978327836734694	0.963547755102041	0.0622181224489796	0.938534775510204	0.40110987755102	3	0.0162470837193968	0.0272804614226038	0.0217686779856555	0.0527818480087459	0.0383368411702942
691	5 vs. 46	1	0.9986	0.9986	0.0297	0.9697	0.0833	1	0.998942612244898	0.998988244897959	0.0261798367346939	0.973154367346939	0.0477981224489796	1	0.000443190711999786	0.000438776826387494	0.00526656986503144	0.0241848423728632	0.0280526463759508
692	5 vs. 46	2	0.9982	0.9982	0.0254	0.9677	0.1389	2	0.997084244897959	0.997079102040816	0.0320324897959184	0.98314506122449	0.13334	2	0.00167378038871567	0.00167997748687571	0.00839505607048402	0.0172091595875419	0.019070642667847
693	5 vs. 46	3	0.9906	0.9844	0.0427	1	0.4444	3	0.978327836734694	0.963547755102041	0.0622181224489796	0.938534775510204	0.40110987755102	3	0.0162470837193968	0.0272804614226038	0.0217686779856555	0.0527818480087459	0.0383368411702942
694	5 vs. 47	1	0.9986	0.9986	0.0296	1	0.0556	1	0.998942612244898	0.998988244897959	0.0261798367346939	0.973154367346939	0.0477981224489796	1	0.000443190711999786	0.000438776826387494	0.00526656986503144	0.0241848423728632	0.0280526463759508
695	5 vs. 47	2	0.9985	0.9984	0.0232	0.9677	0.1389	2	0.997084244897959	0.997079102040816	0.0320324897959184	0.98314506122449	0.13334	2	0.00167378038871567	0.00167997748687571	0.00839505607048402	0.0172091595875419	0.019070642667847
696	5 vs. 47	3	0.9902	0.9854	0.044	0.9524	0.4167	3	0.978327836734694	0.963547755102041	0.0622181224489796	0.938534775510204	0.40110987755102	3	0.0162470837193968	0.0272804614226038	0.0217686779856555	0.0527818480087459	0.0383368411702942
697	5 vs. 48	1	0.9986	0.9986	0.0302	0.9412	0.0556	1	0.998942612244898	0.998988244897959	0.0261798367346939	0.973154367346939	0.0477981224489796	1	0.000443190711999786	0.000438776826387494	0.00526656986503144	0.0241848423728632	0.0280526463759508
698	5 vs. 48	2	0.9967	0.9967	0.0353	1	0.1111	2	0.997084244897959	0.997079102040816	0.0320324897959184	0.98314506122449	0.13334	2	0.00167378038871567	0.00167997748687571	0.00839505607048402	0.0172091595875419	0.019070642667847
699	5 vs. 48	3	0.986	0.9799	0.052	0.9524	0.4167	3	0.978327836734694	0.963547755102041	0.0622181224489796	0.938534775510204	0.40110987755102	3	0.0162470837193968	0.0272804614226038	0.0217686779856555	0.0527818480087459	0.0383368411702942
700	5 vs. 49	1	0.9991	0.9991	0.0237	0.9714	0.0278	1	0.998942612244898	0.998988244897959	0.0261798367346939	0.973154367346939	0.0477981224489796	1	0.000443190711999786	0.000438776826387494	0.00526656986503144	0.0241848423728632	0.0280526463759508
701	5 vs. 49	2	0.9986	0.9985	0.0239	0.9677	0.1389	2	0.997084244897959	0.997079102040816	0.0320324897959184	0.98314506122449	0.13334	2	0.00167378038871567	0.00167997748687571	0.00839505607048402	0.0172091595875419	0.019070642667847
702	5 vs. 49	3	0.9828	0.9727	0.0603	0.9524	0.4167	3	0.978327836734694	0.963547755102041	0.0622181224489796	0.938534775510204	0.40110987755102	3	0.0162470837193968	0.0272804614226038	0.0217686779856555	0.0527818480087459	0.0383368411702942
703	5 vs. 50	1	0.9984	0.9987	0.0318	0.9375	0.1111	1	0.998942612244898	0.998988244897959	0.0261798367346939	0.973154367346939	0.0477981224489796	1	0.000443190711999786	0.000438776826387494	0.00526656986503144	0.0241848423728632	0.0280526463759508
704	5 vs. 50	2	0.9961	0.996	0.0375	1	0.1111	2	0.997084244897959	0.997079102040816	0.0320324897959184	0.98314506122449	0.13334	2	0.00167378038871567	0.00167997748687571	0.00839505607048402	0.0172091595875419	0.019070642667847
705	5 vs. 50	3	0.9906	0.9827	0.0427	1	0.4444	3	0.978327836734694	0.963547755102041	0.0622181224489796	0.938534775510204	0.40110987755102	3	0.0162470837193968	0.0272804614226038	0.0217686779856555	0.0527818480087459	0.0383368411702942
706	6 vs. 7	1	0.9997	0.9997	0.0138	1	0.0556	1	0.998942612244898	0.998988244897959	0.0261798367346939	0.973154367346939	0.0477981224489796	1	0.000443190711999786	0.000438776826387494	0.00526656986503144	0.0241848423728632	0.0280526463759508
707	6 vs. 7	2	0.998	0.9979	0.0282	0.9677	0.1389	2	0.997084244897959	0.997079102040816	0.0320324897959184	0.98314506122449	0.13334	2	0.00167378038871567	0.00167997748687571	0.00839505607048402	0.0172091595875419	0.019070642667847
708	6 vs. 7	3	0.9842	0.9746	0.0576	0.9565	0.3611	3	0.978327836734694	0.963547755102041	0.0622181224489796	0.938534775510204	0.40110987755102	3	0.0162470837193968	0.0272804614226038	0.0217686779856555	0.0527818480087459	0.0383368411702942
709	6 vs. 8	1	0.9991	0.9991	0.0247	1	0.0556	1	0.998942612244898	0.998988244897959	0.0261798367346939	0.973154367346939	0.0477981224489796	1	0.000443190711999786	0.000438776826387494	0.00526656986503144	0.0241848423728632	0.0280526463759508
710	6 vs. 8	2	0.9955	0.9958	0.0407	0.9677	0.1389	2	0.997084244897959	0.997079102040816	0.0320324897959184	0.98314506122449	0.13334	2	0.00167378038871567	0.00167997748687571	0.00839505607048402	0.0172091595875419	0.019070642667847
711	6 vs. 8	3	0.8887	0.8061	0.1481	0.7826	0.3611	3	0.978327836734694	0.963547755102041	0.0622181224489796	0.938534775510204	0.40110987755102	3	0.0162470837193968	0.0272804614226038	0.0217686779856555	0.0527818480087459	0.0383368411702942
712	6 vs. 9	1	0.999	0.9991	0.0262	0.9714	0.0278	1	0.998942612244898	0.998988244897959	0.0261798367346939	0.973154367346939	0.0477981224489796	1	0.000443190711999786	0.000438776826387494	0.00526656986503144	0.0241848423728632	0.0280526463759508
713	6 vs. 9	2	0.9972	0.9971	0.0331	1	0.1111	2	0.997084244897959	0.997079102040816	0.0320324897959184	0.98314506122449	0.13334	2	0.00167378038871567	0.00167997748687571	0.00839505607048402	0.0172091595875419	0.019070642667847
714	6 vs. 9	3	0.9842	0.9754	0.0572	0.9565	0.3611	3	0.978327836734694	0.963547755102041	0.0622181224489796	0.938534775510204	0.40110987755102	3	0.0162470837193968	0.0272804614226038	0.0217686779856555	0.0527818480087459	0.0383368411702942
715	6 vs. 10	1	0.9993	0.9994	0.021	0.9697	0.0833	1	0.998942612244898	0.998988244897959	0.0261798367346939	0.973154367346939	0.0477981224489796	1	0.000443190711999786	0.000438776826387494	0.00526656986503144	0.0241848423728632	0.0280526463759508
716	6 vs. 10	2	0.9964	0.9963	0.0384	0.9677	0.1389	2	0.997084244897959	0.997079102040816	0.0320324897959184	0.98314506122449	0.13334	2	0.00167378038871567	0.00167997748687571	0.00839505607048402	0.0172091595875419	0.019070642667847
717	6 vs. 10	3	0.9515	0.9182	0.0987	0.9091	0.3889	3	0.978327836734694	0.963547755102041	0.0622181224489796	0.938534775510204	0.40110987755102	3	0.0162470837193968	0.0272804614226038	0.0217686779856555	0.0527818480087459	0.0383368411702942
718	6 vs. 11	1	0.9995	0.9996	0.018	1	0.0556	1	0.998942612244898	0.998988244897959	0.0261798367346939	0.973154367346939	0.0477981224489796	1	0.000443190711999786	0.000438776826387494	0.00526656986503144	0.0241848423728632	0.0280526463759508
719	6 vs. 11	2	0.9982	0.9982	0.0248	0.9677	0.1389	2	0.997084244897959	0.997079102040816	0.0320324897959184	0.98314506122449	0.13334	2	0.00167378038871567	0.00167997748687571	0.00839505607048402	0.0172091595875419	0.019070642667847
720	6 vs. 11	3	0.9902	0.9847	0.0438	0.9167	0.3333	3	0.978327836734694	0.963547755102041	0.0622181224489796	0.938534775510204	0.40110987755102	3	0.0162470837193968	0.0272804614226038	0.0217686779856555	0.0527818480087459	0.0383368411702942
721	6 vs. 12	1	0.9992	0.9992	0.0232	0.9714	0.0278	1	0.998942612244898	0.998988244897959	0.0261798367346939	0.973154367346939	0.0477981224489796	1	0.000443190711999786	0.000438776826387494	0.00526656986503144	0.0241848423728632	0.0280526463759508
722	6 vs. 12	2	0.9981	0.998	0.0263	0.9677	0.1389	2	0.997084244897959	0.997079102040816	0.0320324897959184	0.98314506122449	0.13334	2	0.00167378038871567	0.00167997748687571	0.00839505607048402	0.0172091595875419	0.019070642667847
723	6 vs. 12	3	0.9335	0.886	0.1133	0.8571	0.4167	3	0.978327836734694	0.963547755102041	0.0622181224489796	0.938534775510204	0.40110987755102	3	0.0162470837193968	0.0272804614226038	0.0217686779856555	0.0527818480087459	0.0383368411702942
724	6 vs. 13	1	0.9983	0.9983	0.0333	0.9412	0.0556	1	0.998942612244898	0.998988244897959	0.0261798367346939	0.973154367346939	0.0477981224489796	1	0.000443190711999786	0.000438776826387494	0.00526656986503144	0.0241848423728632	0.0280526463759508
725	6 vs. 13	2	0.9981	0.998	0.0306	1	0.1111	2	0.997084244897959	0.997079102040816	0.0320324897959184	0.98314506122449	0.13334	2	0.00167378038871567	0.00167997748687571	0.00839505607048402	0.0172091595875419	0.019070642667847
726	6 vs. 13	3	0.9723	0.9533	0.0733	0.9091	0.3889	3	0.978327836734694	0.963547755102041	0.0622181224489796	0.938534775510204	0.40110987755102	3	0.0162470837193968	0.0272804614226038	0.0217686779856555	0.0527818480087459	0.0383368411702942
727	6 vs. 14	1	0.9992	0.9992	0.0232	0.9714	0.0278	1	0.998942612244898	0.998988244897959	0.0261798367346939	0.973154367346939	0.0477981224489796	1	0.000443190711999786	0.000438776826387494	0.00526656986503144	0.0241848423728632	0.0280526463759508
728	6 vs. 14	2	0.9972	0.9971	0.0331	1	0.1111	2	0.997084244897959	0.997079102040816	0.0320324897959184	0.98314506122449	0.13334	2	0.00167378038871567	0.00167997748687571	0.00839505607048402	0.0172091595875419	0.019070642667847
729	6 vs. 14	3	0.9877	0.9796	0.0494	1	0.3333	3	0.978327836734694	0.963547755102041	0.0622181224489796	0.938534775510204	0.40110987755102	3	0.0162470837193968	0.0272804614226038	0.0217686779856555	0.0527818480087459	0.0383368411702942
730	6 vs. 15	1	0.9993	0.9993	0.0223	0.9412	0.0556	1	0.998942612244898	0.998988244897959	0.0261798367346939	0.973154367346939	0.0477981224489796	1	0.000443190711999786	0.000438776826387494	0.00526656986503144	0.0241848423728632	0.0280526463759508
731	6 vs. 15	2	0.9966	0.9967	0.0359	0.9677	0.1389	2	0.997084244897959	0.997079102040816	0.0320324897959184	0.98314506122449	0.13334	2	0.00167378038871567	0.00167997748687571	0.00839505607048402	0.0172091595875419	0.019070642667847
732	6 vs. 15	3	0.9695	0.9522	0.0779	0.9565	0.3611	3	0.978327836734694	0.963547755102041	0.0622181224489796	0.938534775510204	0.40110987755102	3	0.0162470837193968	0.0272804614226038	0.0217686779856555	0.0527818480087459	0.0383368411702942
733	6 vs. 16	1	0.9992	0.9993	0.0219	1	0.0556	1	0.998942612244898	0.998988244897959	0.0261798367346939	0.973154367346939	0.0477981224489796	1	0.000443190711999786	0.000438776826387494	0.00526656986503144	0.0241848423728632	0.0280526463759508
734	6 vs. 16	2	0.9952	0.9951	0.0437	1	0.1111	2	0.997084244897959	0.997079102040816	0.0320324897959184	0.98314506122449	0.13334	2	0.00167378038871567	0.00167997748687571	0.00839505607048402	0.0172091595875419	0.019070642667847
735	6 vs. 16	3	0.9854	0.976	0.0537	1	0.3333	3	0.978327836734694	0.963547755102041	0.0622181224489796	0.938534775510204	0.40110987755102	3	0.0162470837193968	0.0272804614226038	0.0217686779856555	0.0527818480087459	0.0383368411702942
736	6 vs. 17	1	0.999	0.999	0.0254	1	0.0556	1	0.998942612244898	0.998988244897959	0.0261798367346939	0.973154367346939	0.0477981224489796	1	0.000443190711999786	0.000438776826387494	0.00526656986503144	0.0241848423728632	0.0280526463759508
737	6 vs. 17	2	0.997	0.997	0.0334	1	0.1111	2	0.997084244897959	0.997079102040816	0.0320324897959184	0.98314506122449	0.13334	2	0.00167378038871567	0.00167997748687571	0.00839505607048402	0.0172091595875419	0.019070642667847
738	6 vs. 17	3	0.9758	0.9628	0.0689	0.9565	0.3611	3	0.978327836734694	0.963547755102041	0.0622181224489796	0.938534775510204	0.40110987755102	3	0.0162470837193968	0.0272804614226038	0.0217686779856555	0.0527818480087459	0.0383368411702942
739	6 vs. 18	1	0.9995	0.9995	0.0189	1	0.0556	1	0.998942612244898	0.998988244897959	0.0261798367346939	0.973154367346939	0.0477981224489796	1	0.000443190711999786	0.000438776826387494	0.00526656986503144	0.0241848423728632	0.0280526463759508
740	6 vs. 18	2	0.9952	0.9956	0.0409	0.9677	0.1389	2	0.997084244897959	0.997079102040816	0.0320324897959184	0.98314506122449	0.13334	2	0.00167378038871567	0.00167997748687571	0.00839505607048402	0.0172091595875419	0.019070642667847
741	6 vs. 18	3	0.9678	0.9494	0.0811	0.9565	0.3611	3	0.978327836734694	0.963547755102041	0.0622181224489796	0.938534775510204	0.40110987755102	3	0.0162470837193968	0.0272804614226038	0.0217686779856555	0.0527818480087459	0.0383368411702942
742	6 vs. 19	1	0.999	0.999	0.0249	1	0.0556	1	0.998942612244898	0.998988244897959	0.0261798367346939	0.973154367346939	0.0477981224489796	1	0.000443190711999786	0.000438776826387494	0.00526656986503144	0.0241848423728632	0.0280526463759508
743	6 vs. 19	2	0.9969	0.9968	0.0333	1	0.1111	2	0.997084244897959	0.997079102040816	0.0320324897959184	0.98314506122449	0.13334	2	0.00167378038871567	0.00167997748687571	0.00839505607048402	0.0172091595875419	0.019070642667847
744	6 vs. 19	3	0.9777	0.9688	0.0687	0.96	0.3056	3	0.978327836734694	0.963547755102041	0.0622181224489796	0.938534775510204	0.40110987755102	3	0.0162470837193968	0.0272804614226038	0.0217686779856555	0.0527818480087459	0.0383368411702942
745	6 vs. 20	1	0.9995	0.9995	0.0191	0.9714	0.0278	1	0.998942612244898	0.998988244897959	0.0261798367346939	0.973154367346939	0.0477981224489796	1	0.000443190711999786	0.000438776826387494	0.00526656986503144	0.0241848423728632	0.0280526463759508
746	6 vs. 20	2	0.9983	0.9983	0.024	1	0.1111	2	0.997084244897959	0.997079102040816	0.0320324897959184	0.98314506122449	0.13334	2	0.00167378038871567	0.00167997748687571	0.00839505607048402	0.0172091595875419	0.019070642667847
747	6 vs. 20	3	0.9653	0.9449	0.0832	0.9167	0.3333	3	0.978327836734694	0.963547755102041	0.0622181224489796	0.938534775510204	0.40110987755102	3	0.0162470837193968	0.0272804614226038	0.0217686779856555	0.0527818480087459	0.0383368411702942
748	6 vs. 21	1	0.9994	0.9995	0.0196	0.9714	0.0278	1	0.998942612244898	0.998988244897959	0.0261798367346939	0.973154367346939	0.0477981224489796	1	0.000443190711999786	0.000438776826387494	0.00526656986503144	0.0241848423728632	0.0280526463759508
749	6 vs. 21	2	0.9976	0.9975	0.0284	1	0.1111	2	0.997084244897959	0.997079102040816	0.0320324897959184	0.98314506122449	0.13334	2	0.00167378038871567	0.00167997748687571	0.00839505607048402	0.0172091595875419	0.019070642667847
750	6 vs. 21	3	0.9641	0.9415	0.0858	0.9565	0.3611	3	0.978327836734694	0.963547755102041	0.0622181224489796	0.938534775510204	0.40110987755102	3	0.0162470837193968	0.0272804614226038	0.0217686779856555	0.0527818480087459	0.0383368411702942
751	6 vs. 22	1	0.9986	0.9987	0.0296	1	0.0556	1	0.998942612244898	0.998988244897959	0.0261798367346939	0.973154367346939	0.0477981224489796	1	0.000443190711999786	0.000438776826387494	0.00526656986503144	0.0241848423728632	0.0280526463759508
752	6 vs. 22	2	0.9964	0.9962	0.0379	1	0.1111	2	0.997084244897959	0.997079102040816	0.0320324897959184	0.98314506122449	0.13334	2	0.00167378038871567	0.00167997748687571	0.00839505607048402	0.0172091595875419	0.019070642667847
753	6 vs. 22	3	0.9731	0.9548	0.0729	0.9565	0.3611	3	0.978327836734694	0.963547755102041	0.0622181224489796	0.938534775510204	0.40110987755102	3	0.0162470837193968	0.0272804614226038	0.0217686779856555	0.0527818480087459	0.0383368411702942
754	6 vs. 23	1	0.9993	0.9993	0.022	1	0.0556	1	0.998942612244898	0.998988244897959	0.0261798367346939	0.973154367346939	0.0477981224489796	1	0.000443190711999786	0.000438776826387494	0.00526656986503144	0.0241848423728632	0.0280526463759508
755	6 vs. 23	2	0.9983	0.9982	0.024	1	0.1111	2	0.997084244897959	0.997079102040816	0.0320324897959184	0.98314506122449	0.13334	2	0.00167378038871567	0.00167997748687571	0.00839505607048402	0.0172091595875419	0.019070642667847
756	6 vs. 23	3	0.9652	0.9467	0.0831	0.9565	0.3611	3	0.978327836734694	0.963547755102041	0.0622181224489796	0.938534775510204	0.40110987755102	3	0.0162470837193968	0.0272804614226038	0.0217686779856555	0.0527818480087459	0.0383368411702942
757	6 vs. 24	1	0.9991	0.9991	0.0237	0.9714	0.0278	1	0.998942612244898	0.998988244897959	0.0261798367346939	0.973154367346939	0.0477981224489796	1	0.000443190711999786	0.000438776826387494	0.00526656986503144	0.0241848423728632	0.0280526463759508
758	6 vs. 24	2	0.9987	0.9987	0.0235	0.9677	0.1389	2	0.997084244897959	0.997079102040816	0.0320324897959184	0.98314506122449	0.13334	2	0.00167378038871567	0.00167997748687571	0.00839505607048402	0.0172091595875419	0.019070642667847
759	6 vs. 24	3	0.9668	0.9445	0.0802	0.9565	0.3611	3	0.978327836734694	0.963547755102041	0.0622181224489796	0.938534775510204	0.40110987755102	3	0.0162470837193968	0.0272804614226038	0.0217686779856555	0.0527818480087459	0.0383368411702942
760	6 vs. 25	1	0.9994	0.9994	0.0218	0.9714	0.0278	1	0.998942612244898	0.998988244897959	0.0261798367346939	0.973154367346939	0.0477981224489796	1	0.000443190711999786	0.000438776826387494	0.00526656986503144	0.0241848423728632	0.0280526463759508
761	6 vs. 25	2	0.9993	0.9993	0.0171	0.9677	0.1389	2	0.997084244897959	0.997079102040816	0.0320324897959184	0.98314506122449	0.13334	2	0.00167378038871567	0.00167997748687571	0.00839505607048402	0.0172091595875419	0.019070642667847
762	6 vs. 25	3	0.9784	0.9673	0.0682	0.9565	0.3611	3	0.978327836734694	0.963547755102041	0.0622181224489796	0.938534775510204	0.40110987755102	3	0.0162470837193968	0.0272804614226038	0.0217686779856555	0.0527818480087459	0.0383368411702942
763	6 vs. 26	1	0.9992	0.9992	0.0242	0.9714	0.0278	1	0.998942612244898	0.998988244897959	0.0261798367346939	0.973154367346939	0.0477981224489796	1	0.000443190711999786	0.000438776826387494	0.00526656986503144	0.0241848423728632	0.0280526463759508
764	6 vs. 26	2	0.9979	0.9978	0.0306	0.9677	0.1389	2	0.997084244897959	0.997079102040816	0.0320324897959184	0.98314506122449	0.13334	2	0.00167378038871567	0.00167997748687571	0.00839505607048402	0.0172091595875419	0.019070642667847
765	6 vs. 26	3	0.9646	0.9419	0.086	0.9565	0.3611	3	0.978327836734694	0.963547755102041	0.0622181224489796	0.938534775510204	0.40110987755102	3	0.0162470837193968	0.0272804614226038	0.0217686779856555	0.0527818480087459	0.0383368411702942
766	6 vs. 27	1	0.9986	0.9986	0.0306	0.9697	0.0833	1	0.998942612244898	0.998988244897959	0.0261798367346939	0.973154367346939	0.0477981224489796	1	0.000443190711999786	0.000438776826387494	0.00526656986503144	0.0241848423728632	0.0280526463759508
767	6 vs. 27	2	0.9953	0.9953	0.043	1	0.1111	2	0.997084244897959	0.997079102040816	0.0320324897959184	0.98314506122449	0.13334	2	0.00167378038871567	0.00167997748687571	0.00839505607048402	0.0172091595875419	0.019070642667847
768	6 vs. 27	3	0.9407	0.9038	0.1071	0.8571	0.4167	3	0.978327836734694	0.963547755102041	0.0622181224489796	0.938534775510204	0.40110987755102	3	0.0162470837193968	0.0272804614226038	0.0217686779856555	0.0527818480087459	0.0383368411702942
769	6 vs. 28	1	0.9986	0.9988	0.0303	0.9714	0.0278	1	0.998942612244898	0.998988244897959	0.0261798367346939	0.973154367346939	0.0477981224489796	1	0.000443190711999786	0.000438776826387494	0.00526656986503144	0.0241848423728632	0.0280526463759508
770	6 vs. 28	2	0.9942	0.9943	0.0456	1	0.1111	2	0.997084244897959	0.997079102040816	0.0320324897959184	0.98314506122449	0.13334	2	0.00167378038871567	0.00167997748687571	0.00839505607048402	0.0172091595875419	0.019070642667847
771	6 vs. 28	3	0.9693	0.9502	0.0773	0.9091	0.3889	3	0.978327836734694	0.963547755102041	0.0622181224489796	0.938534775510204	0.40110987755102	3	0.0162470837193968	0.0272804614226038	0.0217686779856555	0.0527818480087459	0.0383368411702942
772	6 vs. 29	1	0.9995	0.9995	0.0192	1	0.0556	1	0.998942612244898	0.998988244897959	0.0261798367346939	0.973154367346939	0.0477981224489796	1	0.000443190711999786	0.000438776826387494	0.00526656986503144	0.0241848423728632	0.0280526463759508
773	6 vs. 29	2	0.9975	0.9975	0.0307	1	0.1111	2	0.997084244897959	0.997079102040816	0.0320324897959184	0.98314506122449	0.13334	2	0.00167378038871567	0.00167997748687571	0.00839505607048402	0.0172091595875419	0.019070642667847
774	6 vs. 29	3	0.9856	0.9759	0.0531	0.9565	0.3611	3	0.978327836734694	0.963547755102041	0.0622181224489796	0.938534775510204	0.40110987755102	3	0.0162470837193968	0.0272804614226038	0.0217686779856555	0.0527818480087459	0.0383368411702942
775	6 vs. 30	1	0.999	0.9991	0.025	0.9714	0.0278	1	0.998942612244898	0.998988244897959	0.0261798367346939	0.973154367346939	0.0477981224489796	1	0.000443190711999786	0.000438776826387494	0.00526656986503144	0.0241848423728632	0.0280526463759508
776	6 vs. 30	2	0.9988	0.9988	0.0202	0.9677	0.1389	2	0.997084244897959	0.997079102040816	0.0320324897959184	0.98314506122449	0.13334	2	0.00167378038871567	0.00167997748687571	0.00839505607048402	0.0172091595875419	0.019070642667847
777	6 vs. 30	3	0.9402	0.8983	0.1079	0.8571	0.4167	3	0.978327836734694	0.963547755102041	0.0622181224489796	0.938534775510204	0.40110987755102	3	0.0162470837193968	0.0272804614226038	0.0217686779856555	0.0527818480087459	0.0383368411702942
778	6 vs. 31	1	0.9984	0.9984	0.0324	0.9412	0.0556	1	0.998942612244898	0.998988244897959	0.0261798367346939	0.973154367346939	0.0477981224489796	1	0.000443190711999786	0.000438776826387494	0.00526656986503144	0.0241848423728632	0.0280526463759508
779	6 vs. 31	2	0.9984	0.9983	0.0234	1	0.1111	2	0.997084244897959	0.997079102040816	0.0320324897959184	0.98314506122449	0.13334	2	0.00167378038871567	0.00167997748687571	0.00839505607048402	0.0172091595875419	0.019070642667847
780	6 vs. 31	3	0.9529	0.9199	0.0958	0.9091	0.3889	3	0.978327836734694	0.963547755102041	0.0622181224489796	0.938534775510204	0.40110987755102	3	0.0162470837193968	0.0272804614226038	0.0217686779856555	0.0527818480087459	0.0383368411702942
781	6 vs. 32	1	0.999	0.999	0.0253	1	0.0556	1	0.998942612244898	0.998988244897959	0.0261798367346939	0.973154367346939	0.0477981224489796	1	0.000443190711999786	0.000438776826387494	0.00526656986503144	0.0241848423728632	0.0280526463759508
782	6 vs. 32	2	0.9959	0.9957	0.0439	1	0.1111	2	0.997084244897959	0.997079102040816	0.0320324897959184	0.98314506122449	0.13334	2	0.00167378038871567	0.00167997748687571	0.00839505607048402	0.0172091595875419	0.019070642667847
783	6 vs. 32	3	0.972	0.9527	0.0743	1	0.3333	3	0.978327836734694	0.963547755102041	0.0622181224489796	0.938534775510204	0.40110987755102	3	0.0162470837193968	0.0272804614226038	0.0217686779856555	0.0527818480087459	0.0383368411702942
784	6 vs. 33	1	0.9985	0.9986	0.0311	0.9375	0.1111	1	0.998942612244898	0.998988244897959	0.0261798367346939	0.973154367346939	0.0477981224489796	1	0.000443190711999786	0.000438776826387494	0.00526656986503144	0.0241848423728632	0.0280526463759508
785	6 vs. 33	2	0.996	0.9959	0.0382	0.9677	0.1389	2	0.997084244897959	0.997079102040816	0.0320324897959184	0.98314506122449	0.13334	2	0.00167378038871567	0.00167997748687571	0.00839505607048402	0.0172091595875419	0.019070642667847
786	6 vs. 33	3	0.9665	0.9469	0.0809	0.8571	0.4167	3	0.978327836734694	0.963547755102041	0.0622181224489796	0.938534775510204	0.40110987755102	3	0.0162470837193968	0.0272804614226038	0.0217686779856555	0.0527818480087459	0.0383368411702942
787	6 vs. 34	1	0.9994	0.9996	0.02	1	0.0556	1	0.998942612244898	0.998988244897959	0.0261798367346939	0.973154367346939	0.0477981224489796	1	0.000443190711999786	0.000438776826387494	0.00526656986503144	0.0241848423728632	0.0280526463759508
788	6 vs. 34	2	0.9963	0.9962	0.0372	1	0.1111	2	0.997084244897959	0.997079102040816	0.0320324897959184	0.98314506122449	0.13334	2	0.00167378038871567	0.00167997748687571	0.00839505607048402	0.0172091595875419	0.019070642667847
789	6 vs. 34	3	0.9898	0.9842	0.0447	0.9565	0.3611	3	0.978327836734694	0.963547755102041	0.0622181224489796	0.938534775510204	0.40110987755102	3	0.0162470837193968	0.0272804614226038	0.0217686779856555	0.0527818480087459	0.0383368411702942
790	6 vs. 35	1	0.9993	0.9993	0.0229	1	0.0556	1	0.998942612244898	0.998988244897959	0.0261798367346939	0.973154367346939	0.0477981224489796	1	0.000443190711999786	0.000438776826387494	0.00526656986503144	0.0241848423728632	0.0280526463759508
791	6 vs. 35	2	0.9957	0.9955	0.0429	0.9677	0.1389	2	0.997084244897959	0.997079102040816	0.0320324897959184	0.98314506122449	0.13334	2	0.00167378038871567	0.00167997748687571	0.00839505607048402	0.0172091595875419	0.019070642667847
792	6 vs. 35	3	0.9863	0.9773	0.0517	0.9565	0.3611	3	0.978327836734694	0.963547755102041	0.0622181224489796	0.938534775510204	0.40110987755102	3	0.0162470837193968	0.0272804614226038	0.0217686779856555	0.0527818480087459	0.0383368411702942
793	6 vs. 36	1	0.9988	0.9988	0.0275	1	0.0556	1	0.998942612244898	0.998988244897959	0.0261798367346939	0.973154367346939	0.0477981224489796	1	0.000443190711999786	0.000438776826387494	0.00526656986503144	0.0241848423728632	0.0280526463759508
794	6 vs. 36	2	0.9938	0.9935	0.0499	1	0.1111	2	0.997084244897959	0.997079102040816	0.0320324897959184	0.98314506122449	0.13334	2	0.00167378038871567	0.00167997748687571	0.00839505607048402	0.0172091595875419	0.019070642667847
795	6 vs. 36	3	0.9792	0.9651	0.0639	1	0.3333	3	0.978327836734694	0.963547755102041	0.0622181224489796	0.938534775510204	0.40110987755102	3	0.0162470837193968	0.0272804614226038	0.0217686779856555	0.0527818480087459	0.0383368411702942
796	6 vs. 37	1	0.9992	0.9992	0.0226	0.9697	0.0833	1	0.998942612244898	0.998988244897959	0.0261798367346939	0.973154367346939	0.0477981224489796	1	0.000443190711999786	0.000438776826387494	0.00526656986503144	0.0241848423728632	0.0280526463759508
797	6 vs. 37	2	0.9986	0.9985	0.023	0.9677	0.1389	2	0.997084244897959	0.997079102040816	0.0320324897959184	0.98314506122449	0.13334	2	0.00167378038871567	0.00167997748687571	0.00839505607048402	0.0172091595875419	0.019070642667847
798	6 vs. 37	3	0.9564	0.9275	0.0925	0.9091	0.3889	3	0.978327836734694	0.963547755102041	0.0622181224489796	0.938534775510204	0.40110987755102	3	0.0162470837193968	0.0272804614226038	0.0217686779856555	0.0527818480087459	0.0383368411702942
799	6 vs. 38	1	0.9996	0.9996	0.0191	1	0.0556	1	0.998942612244898	0.998988244897959	0.0261798367346939	0.973154367346939	0.0477981224489796	1	0.000443190711999786	0.000438776826387494	0.00526656986503144	0.0241848423728632	0.0280526463759508
800	6 vs. 38	2	0.9986	0.9985	0.0232	1	0.1111	2	0.997084244897959	0.997079102040816	0.0320324897959184	0.98314506122449	0.13334	2	0.00167378038871567	0.00167997748687571	0.00839505607048402	0.0172091595875419	0.019070642667847
801	6 vs. 38	3	0.9538	0.9215	0.0949	0.8571	0.4167	3	0.978327836734694	0.963547755102041	0.0622181224489796	0.938534775510204	0.40110987755102	3	0.0162470837193968	0.0272804614226038	0.0217686779856555	0.0527818480087459	0.0383368411702942
802	6 vs. 39	1	0.9993	0.9993	0.0221	1	0.0556	1	0.998942612244898	0.998988244897959	0.0261798367346939	0.973154367346939	0.0477981224489796	1	0.000443190711999786	0.000438776826387494	0.00526656986503144	0.0241848423728632	0.0280526463759508
803	6 vs. 39	2	0.9968	0.9968	0.0344	0.9677	0.1389	2	0.997084244897959	0.997079102040816	0.0320324897959184	0.98314506122449	0.13334	2	0.00167378038871567	0.00167997748687571	0.00839505607048402	0.0172091595875419	0.019070642667847
804	6 vs. 39	3	0.9793	0.966	0.0637	0.9565	0.3611	3	0.978327836734694	0.963547755102041	0.0622181224489796	0.938534775510204	0.40110987755102	3	0.0162470837193968	0.0272804614226038	0.0217686779856555	0.0527818480087459	0.0383368411702942
805	6 vs. 40	1	0.9993	0.9993	0.0217	1	0.0556	1	0.998942612244898	0.998988244897959	0.0261798367346939	0.973154367346939	0.0477981224489796	1	0.000443190711999786	0.000438776826387494	0.00526656986503144	0.0241848423728632	0.0280526463759508
806	6 vs. 40	2	0.9976	0.9975	0.0318	1	0.1111	2	0.997084244897959	0.997079102040816	0.0320324897959184	0.98314506122449	0.13334	2	0.00167378038871567	0.00167997748687571	0.00839505607048402	0.0172091595875419	0.019070642667847
807	6 vs. 40	3	0.9584	0.9295	0.0906	0.8571	0.4167	3	0.978327836734694	0.963547755102041	0.0622181224489796	0.938534775510204	0.40110987755102	3	0.0162470837193968	0.0272804614226038	0.0217686779856555	0.0527818480087459	0.0383368411702942
808	6 vs. 41	1	0.9989	0.999	0.0259	0.9714	0.0278	1	0.998942612244898	0.998988244897959	0.0261798367346939	0.973154367346939	0.0477981224489796	1	0.000443190711999786	0.000438776826387494	0.00526656986503144	0.0241848423728632	0.0280526463759508
809	6 vs. 41	2	0.9961	0.9959	0.037	0.9677	0.1389	2	0.997084244897959	0.997079102040816	0.0320324897959184	0.98314506122449	0.13334	2	0.00167378038871567	0.00167997748687571	0.00839505607048402	0.0172091595875419	0.019070642667847
810	6 vs. 41	3	0.9835	0.9733	0.0569	1	0.3333	3	0.978327836734694	0.963547755102041	0.0622181224489796	0.938534775510204	0.40110987755102	3	0.0162470837193968	0.0272804614226038	0.0217686779856555	0.0527818480087459	0.0383368411702942
811	6 vs. 42	1	0.9993	0.9994	0.0257	0.9714	0.0278	1	0.998942612244898	0.998988244897959	0.0261798367346939	0.973154367346939	0.0477981224489796	1	0.000443190711999786	0.000438776826387494	0.00526656986503144	0.0241848423728632	0.0280526463759508
812	6 vs. 42	2	0.9926	0.9922	0.0537	1	0.1111	2	0.997084244897959	0.997079102040816	0.0320324897959184	0.98314506122449	0.13334	2	0.00167378038871567	0.00167997748687571	0.00839505607048402	0.0172091595875419	0.019070642667847
813	6 vs. 42	3	0.9833	0.9721	0.0571	0.9091	0.3889	3	0.978327836734694	0.963547755102041	0.0622181224489796	0.938534775510204	0.40110987755102	3	0.0162470837193968	0.0272804614226038	0.0217686779856555	0.0527818480087459	0.0383368411702942
814	6 vs. 43	1	0.9994	0.9994	0.0205	1	0.0556	1	0.998942612244898	0.998988244897959	0.0261798367346939	0.973154367346939	0.0477981224489796	1	0.000443190711999786	0.000438776826387494	0.00526656986503144	0.0241848423728632	0.0280526463759508
815	6 vs. 43	2	0.9979	0.9979	0.0299	1	0.1111	2	0.997084244897959	0.997079102040816	0.0320324897959184	0.98314506122449	0.13334	2	0.00167378038871567	0.00167997748687571	0.00839505607048402	0.0172091595875419	0.019070642667847
816	6 vs. 43	3	0.9536	0.9247	0.0951	0.8571	0.4167	3	0.978327836734694	0.963547755102041	0.0622181224489796	0.938534775510204	0.40110987755102	3	0.0162470837193968	0.0272804614226038	0.0217686779856555	0.0527818480087459	0.0383368411702942
817	6 vs. 44	1	0.9992	0.9992	0.023	1	0.0556	1	0.998942612244898	0.998988244897959	0.0261798367346939	0.973154367346939	0.0477981224489796	1	0.000443190711999786	0.000438776826387494	0.00526656986503144	0.0241848423728632	0.0280526463759508
818	6 vs. 44	2	0.9974	0.9973	0.0304	1	0.1111	2	0.997084244897959	0.997079102040816	0.0320324897959184	0.98314506122449	0.13334	2	0.00167378038871567	0.00167997748687571	0.00839505607048402	0.0172091595875419	0.019070642667847
819	6 vs. 44	3	0.9899	0.9833	0.0446	0.9565	0.3611	3	0.978327836734694	0.963547755102041	0.0622181224489796	0.938534775510204	0.40110987755102	3	0.0162470837193968	0.0272804614226038	0.0217686779856555	0.0527818480087459	0.0383368411702942
820	6 vs. 45	1	0.9993	0.9993	0.0219	1	0.0556	1	0.998942612244898	0.998988244897959	0.0261798367346939	0.973154367346939	0.0477981224489796	1	0.000443190711999786	0.000438776826387494	0.00526656986503144	0.0241848423728632	0.0280526463759508
821	6 vs. 45	2	0.9974	0.9972	0.0355	1	0.1111	2	0.997084244897959	0.997079102040816	0.0320324897959184	0.98314506122449	0.13334	2	0.00167378038871567	0.00167997748687571	0.00839505607048402	0.0172091595875419	0.019070642667847
822	6 vs. 45	3	0.9846	0.9774	0.0551	0.9565	0.3611	3	0.978327836734694	0.963547755102041	0.0622181224489796	0.938534775510204	0.40110987755102	3	0.0162470837193968	0.0272804614226038	0.0217686779856555	0.0527818480087459	0.0383368411702942
823	6 vs. 46	1	0.9996	0.9996	0.0158	0.9697	0.0833	1	0.998942612244898	0.998988244897959	0.0261798367346939	0.973154367346939	0.0477981224489796	1	0.000443190711999786	0.000438776826387494	0.00526656986503144	0.0241848423728632	0.0280526463759508
824	6 vs. 46	2	0.9976	0.9975	0.031	0.9677	0.1389	2	0.997084244897959	0.997079102040816	0.0320324897959184	0.98314506122449	0.13334	2	0.00167378038871567	0.00167997748687571	0.00839505607048402	0.0172091595875419	0.019070642667847
825	6 vs. 46	3	0.9681	0.9471	0.0791	0.9091	0.3889	3	0.978327836734694	0.963547755102041	0.0622181224489796	0.938534775510204	0.40110987755102	3	0.0162470837193968	0.0272804614226038	0.0217686779856555	0.0527818480087459	0.0383368411702942
826	6 vs. 47	1	0.9994	0.9994	0.0198	1	0.0556	1	0.998942612244898	0.998988244897959	0.0261798367346939	0.973154367346939	0.0477981224489796	1	0.000443190711999786	0.000438776826387494	0.00526656986503144	0.0241848423728632	0.0280526463759508
827	6 vs. 47	2	0.9978	0.9977	0.0289	0.9677	0.1389	2	0.997084244897959	0.997079102040816	0.0320324897959184	0.98314506122449	0.13334	2	0.00167378038871567	0.00167997748687571	0.00839505607048402	0.0172091595875419	0.019070642667847
828	6 vs. 47	3	0.9759	0.9601	0.069	0.9565	0.3611	3	0.978327836734694	0.963547755102041	0.0622181224489796	0.938534775510204	0.40110987755102	3	0.0162470837193968	0.0272804614226038	0.0217686779856555	0.0527818480087459	0.0383368411702942
829	6 vs. 48	1	0.9991	0.9992	0.0241	0.9412	0.0556	1	0.998942612244898	0.998988244897959	0.0261798367346939	0.973154367346939	0.0477981224489796	1	0.000443190711999786	0.000438776826387494	0.00526656986503144	0.0241848423728632	0.0280526463759508
830	6 vs. 48	2	0.9957	0.9955	0.0384	1	0.1111	2	0.997084244897959	0.997079102040816	0.0320324897959184	0.98314506122449	0.13334	2	0.00167378038871567	0.00167997748687571	0.00839505607048402	0.0172091595875419	0.019070642667847
831	6 vs. 48	3	0.9849	0.975	0.0543	0.9565	0.3611	3	0.978327836734694	0.963547755102041	0.0622181224489796	0.938534775510204	0.40110987755102	3	0.0162470837193968	0.0272804614226038	0.0217686779856555	0.0527818480087459	0.0383368411702942
832	6 vs. 49	1	0.9994	0.9994	0.0201	0.9714	0.0278	1	0.998942612244898	0.998988244897959	0.0261798367346939	0.973154367346939	0.0477981224489796	1	0.000443190711999786	0.000438776826387494	0.00526656986503144	0.0241848423728632	0.0280526463759508
833	6 vs. 49	2	0.9983	0.9982	0.0243	0.9677	0.1389	2	0.997084244897959	0.997079102040816	0.0320324897959184	0.98314506122449	0.13334	2	0.00167378038871567	0.00167997748687571	0.00839505607048402	0.0172091595875419	0.019070642667847
834	6 vs. 49	3	0.9821	0.9704	0.0612	0.9565	0.3611	3	0.978327836734694	0.963547755102041	0.0622181224489796	0.938534775510204	0.40110987755102	3	0.0162470837193968	0.0272804614226038	0.0217686779856555	0.0527818480087459	0.0383368411702942
835	6 vs. 50	1	0.999	0.9994	0.0253	0.9375	0.1111	1	0.998942612244898	0.998988244897959	0.0261798367346939	0.973154367346939	0.0477981224489796	1	0.000443190711999786	0.000438776826387494	0.00526656986503144	0.0241848423728632	0.0280526463759508
836	6 vs. 50	2	0.995	0.9947	0.0441	1	0.1111	2	0.997084244897959	0.997079102040816	0.0320324897959184	0.98314506122449	0.13334	2	0.00167378038871567	0.00167997748687571	0.00839505607048402	0.0172091595875419	0.019070642667847
837	6 vs. 50	3	0.97	0.9517	0.0767	0.9091	0.3889	3	0.978327836734694	0.963547755102041	0.0622181224489796	0.938534775510204	0.40110987755102	3	0.0162470837193968	0.0272804614226038	0.0217686779856555	0.0527818480087459	0.0383368411702942
838	7 vs. 8	1	0.9991	0.9991	0.0244	1	0.0556	1	0.998942612244898	0.998988244897959	0.0261798367346939	0.973154367346939	0.0477981224489796	1	0.000443190711999786	0.000438776826387494	0.00526656986503144	0.0241848423728632	0.0280526463759508
839	7 vs. 8	2	0.9975	0.998	0.0301	1	0.1667	2	0.997084244897959	0.997079102040816	0.0320324897959184	0.98314506122449	0.13334	2	0.00167378038871567	0.00167997748687571	0.00839505607048402	0.0172091595875419	0.019070642667847
840	7 vs. 8	3	0.9436	0.8954	0.1077	0.8182	0.3889	3	0.978327836734694	0.963547755102041	0.0622181224489796	0.938534775510204	0.40110987755102	3	0.0162470837193968	0.0272804614226038	0.0217686779856555	0.0527818480087459	0.0383368411702942
841	7 vs. 9	1	0.9987	0.9988	0.0282	0.9714	0.0278	1	0.998942612244898	0.998988244897959	0.0261798367346939	0.973154367346939	0.0477981224489796	1	0.000443190711999786	0.000438776826387494	0.00526656986503144	0.0241848423728632	0.0280526463759508
842	7 vs. 9	2	0.9986	0.9986	0.0224	0.9677	0.1389	2	0.997084244897959	0.997079102040816	0.0320324897959184	0.98314506122449	0.13334	2	0.00167378038871567	0.00167997748687571	0.00839505607048402	0.0172091595875419	0.019070642667847
843	7 vs. 9	3	0.995	0.9909	0.0323	1	0.3889	3	0.978327836734694	0.963547755102041	0.0622181224489796	0.938534775510204	0.40110987755102	3	0.0162470837193968	0.0272804614226038	0.0217686779856555	0.0527818480087459	0.0383368411702942
844	7 vs. 10	1	0.9994	0.9995	0.0207	0.9697	0.0833	1	0.998942612244898	0.998988244897959	0.0261798367346939	0.973154367346939	0.0477981224489796	1	0.000443190711999786	0.000438776826387494	0.00526656986503144	0.0241848423728632	0.0280526463759508
845	7 vs. 10	2	0.9973	0.9972	0.0316	1	0.1667	2	0.997084244897959	0.997079102040816	0.0320324897959184	0.98314506122449	0.13334	2	0.00167378038871567	0.00167997748687571	0.00839505607048402	0.0172091595875419	0.019070642667847
846	7 vs. 10	3	0.9728	0.9499	0.0752	0.9524	0.4167	3	0.978327836734694	0.963547755102041	0.0622181224489796	0.938534775510204	0.40110987755102	3	0.0162470837193968	0.0272804614226038	0.0217686779856555	0.0527818480087459	0.0383368411702942
847	7 vs. 11	1	0.9993	0.9994	0.0214	1	0.0556	1	0.998942612244898	0.998988244897959	0.0261798367346939	0.973154367346939	0.0477981224489796	1	0.000443190711999786	0.000438776826387494	0.00526656986503144	0.0241848423728632	0.0280526463759508
848	7 vs. 11	2	0.9979	0.9979	0.0281	1	0.1667	2	0.997084244897959	0.997079102040816	0.0320324897959184	0.98314506122449	0.13334	2	0.00167378038871567	0.00167997748687571	0.00839505607048402	0.0172091595875419	0.019070642667847
849	7 vs. 11	3	0.9615	0.9395	0.0892	0.9565	0.3611	3	0.978327836734694	0.963547755102041	0.0622181224489796	0.938534775510204	0.40110987755102	3	0.0162470837193968	0.0272804614226038	0.0217686779856555	0.0527818480087459	0.0383368411702942
850	7 vs. 12	1	0.999	0.9991	0.0249	0.9714	0.0278	1	0.998942612244898	0.998988244897959	0.0261798367346939	0.973154367346939	0.0477981224489796	1	0.000443190711999786	0.000438776826387494	0.00526656986503144	0.0241848423728632	0.0280526463759508
851	7 vs. 12	2	0.9992	0.9991	0.0179	1	0.1667	2	0.997084244897959	0.997079102040816	0.0320324897959184	0.98314506122449	0.13334	2	0.00167378038871567	0.00167997748687571	0.00839505607048402	0.0172091595875419	0.019070642667847
852	7 vs. 12	3	0.9745	0.9531	0.0733	0.9	0.4444	3	0.978327836734694	0.963547755102041	0.0622181224489796	0.938534775510204	0.40110987755102	3	0.0162470837193968	0.0272804614226038	0.0217686779856555	0.0527818480087459	0.0383368411702942
853	7 vs. 13	1	0.9986	0.9986	0.0306	0.9412	0.0556	1	0.998942612244898	0.998988244897959	0.0261798367346939	0.973154367346939	0.0477981224489796	1	0.000443190711999786	0.000438776826387494	0.00526656986503144	0.0241848423728632	0.0280526463759508
854	7 vs. 13	2	0.9981	0.9981	0.0269	0.9677	0.1389	2	0.997084244897959	0.997079102040816	0.0320324897959184	0.98314506122449	0.13334	2	0.00167378038871567	0.00167997748687571	0.00839505607048402	0.0172091595875419	0.019070642667847
855	7 vs. 13	3	0.9893	0.9822	0.0497	0.9524	0.4167	3	0.978327836734694	0.963547755102041	0.0622181224489796	0.938534775510204	0.40110987755102	3	0.0162470837193968	0.0272804614226038	0.0217686779856555	0.0527818480087459	0.0383368411702942
856	7 vs. 14	1	0.9991	0.9992	0.0233	0.9714	0.0278	1	0.998942612244898	0.998988244897959	0.0261798367346939	0.973154367346939	0.0477981224489796	1	0.000443190711999786	0.000438776826387494	0.00526656986503144	0.0241848423728632	0.0280526463759508
857	7 vs. 14	2	0.9979	0.9978	0.0272	0.9677	0.1389	2	0.997084244897959	0.997079102040816	0.0320324897959184	0.98314506122449	0.13334	2	0.00167378038871567	0.00167997748687571	0.00839505607048402	0.0172091595875419	0.019070642667847
858	7 vs. 14	3	0.9938	0.9895	0.0365	0.9565	0.3611	3	0.978327836734694	0.963547755102041	0.0622181224489796	0.938534775510204	0.40110987755102	3	0.0162470837193968	0.0272804614226038	0.0217686779856555	0.0527818480087459	0.0383368411702942
859	7 vs. 15	1	0.9992	0.9992	0.0224	0.9412	0.0556	1	0.998942612244898	0.998988244897959	0.0261798367346939	0.973154367346939	0.0477981224489796	1	0.000443190711999786	0.000438776826387494	0.00526656986503144	0.0241848423728632	0.0280526463759508
860	7 vs. 15	2	0.9969	0.9971	0.0333	1	0.1667	2	0.997084244897959	0.997079102040816	0.0320324897959184	0.98314506122449	0.13334	2	0.00167378038871567	0.00167997748687571	0.00839505607048402	0.0172091595875419	0.019070642667847
861	7 vs. 15	3	0.9779	0.9598	0.0678	1	0.3889	3	0.978327836734694	0.963547755102041	0.0622181224489796	0.938534775510204	0.40110987755102	3	0.0162470837193968	0.0272804614226038	0.0217686779856555	0.0527818480087459	0.0383368411702942
862	7 vs. 16	1	0.9993	0.9994	0.0211	1	0.0556	1	0.998942612244898	0.998988244897959	0.0261798367346939	0.973154367346939	0.0477981224489796	1	0.000443190711999786	0.000438776826387494	0.00526656986503144	0.0241848423728632	0.0280526463759508
863	7 vs. 16	2	0.9971	0.9972	0.0327	0.9677	0.1389	2	0.997084244897959	0.997079102040816	0.0320324897959184	0.98314506122449	0.13334	2	0.00167378038871567	0.00167997748687571	0.00839505607048402	0.0172091595875419	0.019070642667847
864	7 vs. 16	3	0.9895	0.9854	0.0473	0.9565	0.3611	3	0.978327836734694	0.963547755102041	0.0622181224489796	0.938534775510204	0.40110987755102	3	0.0162470837193968	0.0272804614226038	0.0217686779856555	0.0527818480087459	0.0383368411702942
865	7 vs. 17	1	0.9995	0.9995	0.0196	1	0.0556	1	0.998942612244898	0.998988244897959	0.0261798367346939	0.973154367346939	0.0477981224489796	1	0.000443190711999786	0.000438776826387494	0.00526656986503144	0.0241848423728632	0.0280526463759508
866	7 vs. 17	2	0.9955	0.9953	0.0402	0.9677	0.1389	2	0.997084244897959	0.997079102040816	0.0320324897959184	0.98314506122449	0.13334	2	0.00167378038871567	0.00167997748687571	0.00839505607048402	0.0172091595875419	0.019070642667847
867	7 vs. 17	3	0.9808	0.965	0.0634	1	0.3889	3	0.978327836734694	0.963547755102041	0.0622181224489796	0.938534775510204	0.40110987755102	3	0.0162470837193968	0.0272804614226038	0.0217686779856555	0.0527818480087459	0.0383368411702942
868	7 vs. 18	1	0.9995	0.9995	0.021	1	0.0556	1	0.998942612244898	0.998988244897959	0.0261798367346939	0.973154367346939	0.0477981224489796	1	0.000443190711999786	0.000438776826387494	0.00526656986503144	0.0241848423728632	0.0280526463759508
869	7 vs. 18	2	0.9962	0.9965	0.0373	1	0.1667	2	0.997084244897959	0.997079102040816	0.0320324897959184	0.98314506122449	0.13334	2	0.00167378038871567	0.00167997748687571	0.00839505607048402	0.0172091595875419	0.019070642667847
870	7 vs. 18	3	0.9917	0.9861	0.0417	1	0.3889	3	0.978327836734694	0.963547755102041	0.0622181224489796	0.938534775510204	0.40110987755102	3	0.0162470837193968	0.0272804614226038	0.0217686779856555	0.0527818480087459	0.0383368411702942
871	7 vs. 19	1	0.9992	0.9992	0.0231	1	0.0556	1	0.998942612244898	0.998988244897959	0.0261798367346939	0.973154367346939	0.0477981224489796	1	0.000443190711999786	0.000438776826387494	0.00526656986503144	0.0241848423728632	0.0280526463759508
872	7 vs. 19	2	0.997	0.997	0.0329	0.9677	0.1389	2	0.997084244897959	0.997079102040816	0.0320324897959184	0.98314506122449	0.13334	2	0.00167378038871567	0.00167997748687571	0.00839505607048402	0.0172091595875419	0.019070642667847
873	7 vs. 19	3	0.9832	0.9845	0.0596	0.9167	0.3333	3	0.978327836734694	0.963547755102041	0.0622181224489796	0.938534775510204	0.40110987755102	3	0.0162470837193968	0.0272804614226038	0.0217686779856555	0.0527818480087459	0.0383368411702942
874	7 vs. 20	1	0.9992	0.9992	0.0247	0.9714	0.0278	1	0.998942612244898	0.998988244897959	0.0261798367346939	0.973154367346939	0.0477981224489796	1	0.000443190711999786	0.000438776826387494	0.00526656986503144	0.0241848423728632	0.0280526463759508
875	7 vs. 20	2	0.9965	0.9965	0.0357	0.9677	0.1389	2	0.997084244897959	0.997079102040816	0.0320324897959184	0.98314506122449	0.13334	2	0.00167378038871567	0.00167997748687571	0.00839505607048402	0.0172091595875419	0.019070642667847
876	7 vs. 20	3	0.9695	0.9439	0.0796	0.9565	0.3611	3	0.978327836734694	0.963547755102041	0.0622181224489796	0.938534775510204	0.40110987755102	3	0.0162470837193968	0.0272804614226038	0.0217686779856555	0.0527818480087459	0.0383368411702942
877	7 vs. 21	1	0.9991	0.9991	0.0261	0.9714	0.0278	1	0.998942612244898	0.998988244897959	0.0261798367346939	0.973154367346939	0.0477981224489796	1	0.000443190711999786	0.000438776826387494	0.00526656986503144	0.0241848423728632	0.0280526463759508
878	7 vs. 21	2	0.9988	0.9987	0.0237	0.9677	0.1389	2	0.997084244897959	0.997079102040816	0.0320324897959184	0.98314506122449	0.13334	2	0.00167378038871567	0.00167997748687571	0.00839505607048402	0.0172091595875419	0.019070642667847
879	7 vs. 21	3	0.975	0.954	0.0724	1	0.3889	3	0.978327836734694	0.963547755102041	0.0622181224489796	0.938534775510204	0.40110987755102	3	0.0162470837193968	0.0272804614226038	0.0217686779856555	0.0527818480087459	0.0383368411702942
880	7 vs. 22	1	0.9989	0.999	0.0265	1	0.0556	1	0.998942612244898	0.998988244897959	0.0261798367346939	0.973154367346939	0.0477981224489796	1	0.000443190711999786	0.000438776826387494	0.00526656986503144	0.0241848423728632	0.0280526463759508
881	7 vs. 22	2	0.9975	0.9974	0.0303	0.9677	0.1389	2	0.997084244897959	0.997079102040816	0.0320324897959184	0.98314506122449	0.13334	2	0.00167378038871567	0.00167997748687571	0.00839505607048402	0.0172091595875419	0.019070642667847
882	7 vs. 22	3	0.9794	0.963	0.0655	1	0.3889	3	0.978327836734694	0.963547755102041	0.0622181224489796	0.938534775510204	0.40110987755102	3	0.0162470837193968	0.0272804614226038	0.0217686779856555	0.0527818480087459	0.0383368411702942
883	7 vs. 23	1	0.999	0.9991	0.0255	1	0.0556	1	0.998942612244898	0.998988244897959	0.0261798367346939	0.973154367346939	0.0477981224489796	1	0.000443190711999786	0.000438776826387494	0.00526656986503144	0.0241848423728632	0.0280526463759508
884	7 vs. 23	2	0.9989	0.9988	0.0225	0.9677	0.1389	2	0.997084244897959	0.997079102040816	0.0320324897959184	0.98314506122449	0.13334	2	0.00167378038871567	0.00167997748687571	0.00839505607048402	0.0172091595875419	0.019070642667847
885	7 vs. 23	3	0.9768	0.9588	0.0694	1	0.3889	3	0.978327836734694	0.963547755102041	0.0622181224489796	0.938534775510204	0.40110987755102	3	0.0162470837193968	0.0272804614226038	0.0217686779856555	0.0527818480087459	0.0383368411702942
886	7 vs. 24	1	0.9995	0.9995	0.019	0.9714	0.0278	1	0.998942612244898	0.998988244897959	0.0261798367346939	0.973154367346939	0.0477981224489796	1	0.000443190711999786	0.000438776826387494	0.00526656986503144	0.0241848423728632	0.0280526463759508
887	7 vs. 24	2	0.9987	0.9987	0.0214	1	0.1667	2	0.997084244897959	0.997079102040816	0.0320324897959184	0.98314506122449	0.13334	2	0.00167378038871567	0.00167997748687571	0.00839505607048402	0.0172091595875419	0.019070642667847
888	7 vs. 24	3	0.9912	0.984	0.0472	1	0.3889	3	0.978327836734694	0.963547755102041	0.0622181224489796	0.938534775510204	0.40110987755102	3	0.0162470837193968	0.0272804614226038	0.0217686779856555	0.0527818480087459	0.0383368411702942
889	7 vs. 25	1	0.9996	0.9996	0.017	0.9714	0.0278	1	0.998942612244898	0.998988244897959	0.0261798367346939	0.973154367346939	0.0477981224489796	1	0.000443190711999786	0.000438776826387494	0.00526656986503144	0.0241848423728632	0.0280526463759508
890	7 vs. 25	2	0.9986	0.9986	0.0225	1	0.1667	2	0.997084244897959	0.997079102040816	0.0320324897959184	0.98314506122449	0.13334	2	0.00167378038871567	0.00167997748687571	0.00839505607048402	0.0172091595875419	0.019070642667847
891	7 vs. 25	3	0.984	0.9709	0.0585	1	0.3889	3	0.978327836734694	0.963547755102041	0.0622181224489796	0.938534775510204	0.40110987755102	3	0.0162470837193968	0.0272804614226038	0.0217686779856555	0.0527818480087459	0.0383368411702942
892	7 vs. 26	1	0.9994	0.9994	0.0198	0.9714	0.0278	1	0.998942612244898	0.998988244897959	0.0261798367346939	0.973154367346939	0.0477981224489796	1	0.000443190711999786	0.000438776826387494	0.00526656986503144	0.0241848423728632	0.0280526463759508
893	7 vs. 26	2	0.9989	0.9988	0.0208	1	0.1667	2	0.997084244897959	0.997079102040816	0.0320324897959184	0.98314506122449	0.13334	2	0.00167378038871567	0.00167997748687571	0.00839505607048402	0.0172091595875419	0.019070642667847
894	7 vs. 26	3	0.9846	0.9719	0.0571	1	0.3889	3	0.978327836734694	0.963547755102041	0.0622181224489796	0.938534775510204	0.40110987755102	3	0.0162470837193968	0.0272804614226038	0.0217686779856555	0.0527818480087459	0.0383368411702942
895	7 vs. 27	1	0.9989	0.999	0.0259	0.9697	0.0833	1	0.998942612244898	0.998988244897959	0.0261798367346939	0.973154367346939	0.0477981224489796	1	0.000443190711999786	0.000438776826387494	0.00526656986503144	0.0241848423728632	0.0280526463759508
896	7 vs. 27	2	0.9969	0.9972	0.0336	0.9677	0.1389	2	0.997084244897959	0.997079102040816	0.0320324897959184	0.98314506122449	0.13334	2	0.00167378038871567	0.00167997748687571	0.00839505607048402	0.0172091595875419	0.019070642667847
897	7 vs. 27	3	0.9751	0.9627	0.0724	0.8	0.4444	3	0.978327836734694	0.963547755102041	0.0622181224489796	0.938534775510204	0.40110987755102	3	0.0162470837193968	0.0272804614226038	0.0217686779856555	0.0527818480087459	0.0383368411702942
898	7 vs. 28	1	0.9988	0.9991	0.0271	0.9714	0.0278	1	0.998942612244898	0.998988244897959	0.0261798367346939	0.973154367346939	0.0477981224489796	1	0.000443190711999786	0.000438776826387494	0.00526656986503144	0.0241848423728632	0.0280526463759508
899	7 vs. 28	2	0.9973	0.9976	0.0313	0.9677	0.1389	2	0.997084244897959	0.997079102040816	0.0320324897959184	0.98314506122449	0.13334	2	0.00167378038871567	0.00167997748687571	0.00839505607048402	0.0172091595875419	0.019070642667847
900	7 vs. 28	3	0.987	0.9763	0.0533	0.9524	0.4167	3	0.978327836734694	0.963547755102041	0.0622181224489796	0.938534775510204	0.40110987755102	3	0.0162470837193968	0.0272804614226038	0.0217686779856555	0.0527818480087459	0.0383368411702942
901	7 vs. 29	1	0.9997	0.9997	0.0144	1	0.0556	1	0.998942612244898	0.998988244897959	0.0261798367346939	0.973154367346939	0.0477981224489796	1	0.000443190711999786	0.000438776826387494	0.00526656986503144	0.0241848423728632	0.0280526463759508
902	7 vs. 29	2	0.9989	0.999	0.0202	0.9677	0.1389	2	0.997084244897959	0.997079102040816	0.0320324897959184	0.98314506122449	0.13334	2	0.00167378038871567	0.00167997748687571	0.00839505607048402	0.0172091595875419	0.019070642667847
903	7 vs. 29	3	0.9735	0.9564	0.0744	1	0.3889	3	0.978327836734694	0.963547755102041	0.0622181224489796	0.938534775510204	0.40110987755102	3	0.0162470837193968	0.0272804614226038	0.0217686779856555	0.0527818480087459	0.0383368411702942
904	7 vs. 30	1	0.9994	0.9996	0.0198	0.9714	0.0278	1	0.998942612244898	0.998988244897959	0.0261798367346939	0.973154367346939	0.0477981224489796	1	0.000443190711999786	0.000438776826387494	0.00526656986503144	0.0241848423728632	0.0280526463759508
905	7 vs. 30	2	0.9988	0.9989	0.0218	1	0.1667	2	0.997084244897959	0.997079102040816	0.0320324897959184	0.98314506122449	0.13334	2	0.00167378038871567	0.00167997748687571	0.00839505607048402	0.0172091595875419	0.019070642667847
906	7 vs. 30	3	0.9767	0.9572	0.0699	0.9	0.4444	3	0.978327836734694	0.963547755102041	0.0622181224489796	0.938534775510204	0.40110987755102	3	0.0162470837193968	0.0272804614226038	0.0217686779856555	0.0527818480087459	0.0383368411702942
907	7 vs. 31	1	0.9988	0.9989	0.0283	0.9412	0.0556	1	0.998942612244898	0.998988244897959	0.0261798367346939	0.973154367346939	0.0477981224489796	1	0.000443190711999786	0.000438776826387494	0.00526656986503144	0.0241848423728632	0.0280526463759508
908	7 vs. 31	2	0.9984	0.9984	0.0252	0.9677	0.1389	2	0.997084244897959	0.997079102040816	0.0320324897959184	0.98314506122449	0.13334	2	0.00167378038871567	0.00167997748687571	0.00839505607048402	0.0172091595875419	0.019070642667847
909	7 vs. 31	3	0.9889	0.9801	0.0492	0.9524	0.4167	3	0.978327836734694	0.963547755102041	0.0622181224489796	0.938534775510204	0.40110987755102	3	0.0162470837193968	0.0272804614226038	0.0217686779856555	0.0527818480087459	0.0383368411702942
910	7 vs. 32	1	0.9995	0.9995	0.0171	1	0.0556	1	0.998942612244898	0.998988244897959	0.0261798367346939	0.973154367346939	0.0477981224489796	1	0.000443190711999786	0.000438776826387494	0.00526656986503144	0.0241848423728632	0.0280526463759508
911	7 vs. 32	2	0.9986	0.9986	0.0251	0.9677	0.1389	2	0.997084244897959	0.997079102040816	0.0320324897959184	0.98314506122449	0.13334	2	0.00167378038871567	0.00167997748687571	0.00839505607048402	0.0172091595875419	0.019070642667847
912	7 vs. 32	3	0.9955	0.9927	0.032	0.9565	0.3611	3	0.978327836734694	0.963547755102041	0.0622181224489796	0.938534775510204	0.40110987755102	3	0.0162470837193968	0.0272804614226038	0.0217686779856555	0.0527818480087459	0.0383368411702942
913	7 vs. 33	1	0.999	0.9992	0.0252	0.9375	0.1111	1	0.998942612244898	0.998988244897959	0.0261798367346939	0.973154367346939	0.0477981224489796	1	0.000443190711999786	0.000438776826387494	0.00526656986503144	0.0241848423728632	0.0280526463759508
914	7 vs. 33	2	0.9944	0.9942	0.0446	0.9333	0.1667	2	0.997084244897959	0.997079102040816	0.0320324897959184	0.98314506122449	0.13334	2	0.00167378038871567	0.00167997748687571	0.00839505607048402	0.0172091595875419	0.019070642667847
915	7 vs. 33	3	0.9898	0.9825	0.0471	0.9	0.4444	3	0.978327836734694	0.963547755102041	0.0622181224489796	0.938534775510204	0.40110987755102	3	0.0162470837193968	0.0272804614226038	0.0217686779856555	0.0527818480087459	0.0383368411702942
916	7 vs. 34	1	0.9994	0.9996	0.0198	1	0.0556	1	0.998942612244898	0.998988244897959	0.0261798367346939	0.973154367346939	0.0477981224489796	1	0.000443190711999786	0.000438776826387494	0.00526656986503144	0.0241848423728632	0.0280526463759508
917	7 vs. 34	2	0.9968	0.9968	0.0338	0.9677	0.1389	2	0.997084244897959	0.997079102040816	0.0320324897959184	0.98314506122449	0.13334	2	0.00167378038871567	0.00167997748687571	0.00839505607048402	0.0172091595875419	0.019070642667847
918	7 vs. 34	3	0.9896	0.9811	0.0473	1	0.3889	3	0.978327836734694	0.963547755102041	0.0622181224489796	0.938534775510204	0.40110987755102	3	0.0162470837193968	0.0272804614226038	0.0217686779856555	0.0527818480087459	0.0383368411702942
919	7 vs. 35	1	0.9995	0.9995	0.0188	1	0.0556	1	0.998942612244898	0.998988244897959	0.0261798367346939	0.973154367346939	0.0477981224489796	1	0.000443190711999786	0.000438776826387494	0.00526656986503144	0.0241848423728632	0.0280526463759508
920	7 vs. 35	2	0.9984	0.9985	0.025	1	0.1667	2	0.997084244897959	0.997079102040816	0.0320324897959184	0.98314506122449	0.13334	2	0.00167378038871567	0.00167997748687571	0.00839505607048402	0.0172091595875419	0.019070642667847
921	7 vs. 35	3	0.988	0.9788	0.0509	1	0.3889	3	0.978327836734694	0.963547755102041	0.0622181224489796	0.938534775510204	0.40110987755102	3	0.0162470837193968	0.0272804614226038	0.0217686779856555	0.0527818480087459	0.0383368411702942
922	7 vs. 36	1	0.9989	0.9989	0.0259	1	0.0556	1	0.998942612244898	0.998988244897959	0.0261798367346939	0.973154367346939	0.0477981224489796	1	0.000443190711999786	0.000438776826387494	0.00526656986503144	0.0241848423728632	0.0280526463759508
923	7 vs. 36	2	0.9971	0.9971	0.0329	0.9677	0.1389	2	0.997084244897959	0.997079102040816	0.0320324897959184	0.98314506122449	0.13334	2	0.00167378038871567	0.00167997748687571	0.00839505607048402	0.0172091595875419	0.019070642667847
924	7 vs. 36	3	0.995	0.9913	0.0386	0.9565	0.3611	3	0.978327836734694	0.963547755102041	0.0622181224489796	0.938534775510204	0.40110987755102	3	0.0162470837193968	0.0272804614226038	0.0217686779856555	0.0527818480087459	0.0383368411702942
925	7 vs. 37	1	0.9994	0.9995	0.0194	0.9697	0.0833	1	0.998942612244898	0.998988244897959	0.0261798367346939	0.973154367346939	0.0477981224489796	1	0.000443190711999786	0.000438776826387494	0.00526656986503144	0.0241848423728632	0.0280526463759508
926	7 vs. 37	2	0.9987	0.9987	0.0215	1	0.1667	2	0.997084244897959	0.997079102040816	0.0320324897959184	0.98314506122449	0.13334	2	0.00167378038871567	0.00167997748687571	0.00839505607048402	0.0172091595875419	0.019070642667847
927	7 vs. 37	3	0.9843	0.9714	0.0576	0.9524	0.4167	3	0.978327836734694	0.963547755102041	0.0622181224489796	0.938534775510204	0.40110987755102	3	0.0162470837193968	0.0272804614226038	0.0217686779856555	0.0527818480087459	0.0383368411702942
928	7 vs. 38	1	0.9996	0.9997	0.0219	1	0.0556	1	0.998942612244898	0.998988244897959	0.0261798367346939	0.973154367346939	0.0477981224489796	1	0.000443190711999786	0.000438776826387494	0.00526656986503144	0.0241848423728632	0.0280526463759508
929	7 vs. 38	2	0.9971	0.997	0.0321	0.9677	0.1389	2	0.997084244897959	0.997079102040816	0.0320324897959184	0.98314506122449	0.13334	2	0.00167378038871567	0.00167997748687571	0.00839505607048402	0.0172091595875419	0.019070642667847
930	7 vs. 38	3	0.9805	0.9644	0.0641	0.9	0.4444	3	0.978327836734694	0.963547755102041	0.0622181224489796	0.938534775510204	0.40110987755102	3	0.0162470837193968	0.0272804614226038	0.0217686779856555	0.0527818480087459	0.0383368411702942
931	7 vs. 39	1	0.9997	0.9997	0.0149	1	0.0556	1	0.998942612244898	0.998988244897959	0.0261798367346939	0.973154367346939	0.0477981224489796	1	0.000443190711999786	0.000438776826387494	0.00526656986503144	0.0241848423728632	0.0280526463759508
932	7 vs. 39	2	0.9979	0.998	0.0273	1	0.1667	2	0.997084244897959	0.997079102040816	0.0320324897959184	0.98314506122449	0.13334	2	0.00167378038871567	0.00167997748687571	0.00839505607048402	0.0172091595875419	0.019070642667847
933	7 vs. 39	3	0.9939	0.9888	0.0371	1	0.3889	3	0.978327836734694	0.963547755102041	0.0622181224489796	0.938534775510204	0.40110987755102	3	0.0162470837193968	0.0272804614226038	0.0217686779856555	0.0527818480087459	0.0383368411702942
934	7 vs. 40	1	0.9992	0.9993	0.022	1	0.0556	1	0.998942612244898	0.998988244897959	0.0261798367346939	0.973154367346939	0.0477981224489796	1	0.000443190711999786	0.000438776826387494	0.00526656986503144	0.0241848423728632	0.0280526463759508
935	7 vs. 40	2	0.9971	0.997	0.0322	0.9677	0.1389	2	0.997084244897959	0.997079102040816	0.0320324897959184	0.98314506122449	0.13334	2	0.00167378038871567	0.00167997748687571	0.00839505607048402	0.0172091595875419	0.019070642667847
936	7 vs. 40	3	0.9908	0.9834	0.0442	0.9	0.4444	3	0.978327836734694	0.963547755102041	0.0622181224489796	0.938534775510204	0.40110987755102	3	0.0162470837193968	0.0272804614226038	0.0217686779856555	0.0527818480087459	0.0383368411702942
937	7 vs. 41	1	0.9992	0.9993	0.0234	0.9714	0.0278	1	0.998942612244898	0.998988244897959	0.0261798367346939	0.973154367346939	0.0477981224489796	1	0.000443190711999786	0.000438776826387494	0.00526656986503144	0.0241848423728632	0.0280526463759508
938	7 vs. 41	2	0.998	0.9979	0.0274	1	0.1667	2	0.997084244897959	0.997079102040816	0.0320324897959184	0.98314506122449	0.13334	2	0.00167378038871567	0.00167997748687571	0.00839505607048402	0.0172091595875419	0.019070642667847
939	7 vs. 41	3	0.9953	0.9913	0.0333	0.9565	0.3611	3	0.978327836734694	0.963547755102041	0.0622181224489796	0.938534775510204	0.40110987755102	3	0.0162470837193968	0.0272804614226038	0.0217686779856555	0.0527818480087459	0.0383368411702942
940	7 vs. 42	1	0.9991	0.9992	0.0261	0.9714	0.0278	1	0.998942612244898	0.998988244897959	0.0261798367346939	0.973154367346939	0.0477981224489796	1	0.000443190711999786	0.000438776826387494	0.00526656986503144	0.0241848423728632	0.0280526463759508
941	7 vs. 42	2	0.9918	0.9914	0.055	0.9677	0.1389	2	0.997084244897959	0.997079102040816	0.0320324897959184	0.98314506122449	0.13334	2	0.00167378038871567	0.00167997748687571	0.00839505607048402	0.0172091595875419	0.019070642667847
942	7 vs. 42	3	0.9772	0.96	0.0689	0.9524	0.4167	3	0.978327836734694	0.963547755102041	0.0622181224489796	0.938534775510204	0.40110987755102	3	0.0162470837193968	0.0272804614226038	0.0217686779856555	0.0527818480087459	0.0383368411702942
943	7 vs. 43	1	0.9994	0.9995	0.0188	1	0.0556	1	0.998942612244898	0.998988244897959	0.0261798367346939	0.973154367346939	0.0477981224489796	1	0.000443190711999786	0.000438776826387494	0.00526656986503144	0.0241848423728632	0.0280526463759508
944	7 vs. 43	2	0.9988	0.9989	0.0211	0.9677	0.1389	2	0.997084244897959	0.997079102040816	0.0320324897959184	0.98314506122449	0.13334	2	0.00167378038871567	0.00167997748687571	0.00839505607048402	0.0172091595875419	0.019070642667847
945	7 vs. 43	3	0.9861	0.9762	0.0547	0.9	0.4444	3	0.978327836734694	0.963547755102041	0.0622181224489796	0.938534775510204	0.40110987755102	3	0.0162470837193968	0.0272804614226038	0.0217686779856555	0.0527818480087459	0.0383368411702942
946	7 vs. 44	1	0.9992	0.9992	0.0232	1	0.0556	1	0.998942612244898	0.998988244897959	0.0261798367346939	0.973154367346939	0.0477981224489796	1	0.000443190711999786	0.000438776826387494	0.00526656986503144	0.0241848423728632	0.0280526463759508
947	7 vs. 44	2	0.9984	0.9983	0.0246	0.9677	0.1389	2	0.997084244897959	0.997079102040816	0.0320324897959184	0.98314506122449	0.13334	2	0.00167378038871567	0.00167997748687571	0.00839505607048402	0.0172091595875419	0.019070642667847
948	7 vs. 44	3	0.9743	0.9551	0.073	1	0.3889	3	0.978327836734694	0.963547755102041	0.0622181224489796	0.938534775510204	0.40110987755102	3	0.0162470837193968	0.0272804614226038	0.0217686779856555	0.0527818480087459	0.0383368411702942
949	7 vs. 45	1	0.9994	0.9994	0.0194	1	0.0556	1	0.998942612244898	0.998988244897959	0.0261798367346939	0.973154367346939	0.0477981224489796	1	0.000443190711999786	0.000438776826387494	0.00526656986503144	0.0241848423728632	0.0280526463759508
950	7 vs. 45	2	0.9989	0.9988	0.0218	0.9677	0.1389	2	0.997084244897959	0.997079102040816	0.0320324897959184	0.98314506122449	0.13334	2	0.00167378038871567	0.00167997748687571	0.00839505607048402	0.0172091595875419	0.019070642667847
951	7 vs. 45	3	0.9895	0.981	0.0474	1	0.3889	3	0.978327836734694	0.963547755102041	0.0622181224489796	0.938534775510204	0.40110987755102	3	0.0162470837193968	0.0272804614226038	0.0217686779856555	0.0527818480087459	0.0383368411702942
952	7 vs. 46	1	0.9996	0.9996	0.0157	0.9697	0.0833	1	0.998942612244898	0.998988244897959	0.0261798367346939	0.973154367346939	0.0477981224489796	1	0.000443190711999786	0.000438776826387494	0.00526656986503144	0.0241848423728632	0.0280526463759508
953	7 vs. 46	2	0.9991	0.9991	0.0179	1	0.1667	2	0.997084244897959	0.997079102040816	0.0320324897959184	0.98314506122449	0.13334	2	0.00167378038871567	0.00167997748687571	0.00839505607048402	0.0172091595875419	0.019070642667847
954	7 vs. 46	3	0.9897	0.9812	0.0471	0.9524	0.4167	3	0.978327836734694	0.963547755102041	0.0622181224489796	0.938534775510204	0.40110987755102	3	0.0162470837193968	0.0272804614226038	0.0217686779856555	0.0527818480087459	0.0383368411702942
955	7 vs. 47	1	0.9995	0.9995	0.0175	1	0.0556	1	0.998942612244898	0.998988244897959	0.0261798367346939	0.973154367346939	0.0477981224489796	1	0.000443190711999786	0.000438776826387494	0.00526656986503144	0.0241848423728632	0.0280526463759508
956	7 vs. 47	2	0.9989	0.9988	0.02	1	0.1667	2	0.997084244897959	0.997079102040816	0.0320324897959184	0.98314506122449	0.13334	2	0.00167378038871567	0.00167997748687571	0.00839505607048402	0.0172091595875419	0.019070642667847
957	7 vs. 47	3	0.9952	0.9913	0.0325	1	0.3889	3	0.978327836734694	0.963547755102041	0.0622181224489796	0.938534775510204	0.40110987755102	3	0.0162470837193968	0.0272804614226038	0.0217686779856555	0.0527818480087459	0.0383368411702942
958	7 vs. 48	1	0.9994	0.9994	0.0204	0.9412	0.0556	1	0.998942612244898	0.998988244897959	0.0261798367346939	0.973154367346939	0.0477981224489796	1	0.000443190711999786	0.000438776826387494	0.00526656986503144	0.0241848423728632	0.0280526463759508
959	7 vs. 48	2	0.996	0.9959	0.0391	0.9677	0.1389	2	0.997084244897959	0.997079102040816	0.0320324897959184	0.98314506122449	0.13334	2	0.00167378038871567	0.00167997748687571	0.00839505607048402	0.0172091595875419	0.019070642667847
960	7 vs. 48	3	0.9936	0.9888	0.0386	1	0.3889	3	0.978327836734694	0.963547755102041	0.0622181224489796	0.938534775510204	0.40110987755102	3	0.0162470837193968	0.0272804614226038	0.0217686779856555	0.0527818480087459	0.0383368411702942
961	7 vs. 49	1	0.9992	0.9992	0.0224	0.9714	0.0278	1	0.998942612244898	0.998988244897959	0.0261798367346939	0.973154367346939	0.0477981224489796	1	0.000443190711999786	0.000438776826387494	0.00526656986503144	0.0241848423728632	0.0280526463759508
962	7 vs. 49	2	0.9975	0.9973	0.0311	1	0.1667	2	0.997084244897959	0.997079102040816	0.0320324897959184	0.98314506122449	0.13334	2	0.00167378038871567	0.00167997748687571	0.00839505607048402	0.0172091595875419	0.019070642667847
963	7 vs. 49	3	0.9791	0.9624	0.0663	1	0.3889	3	0.978327836734694	0.963547755102041	0.0622181224489796	0.938534775510204	0.40110987755102	3	0.0162470837193968	0.0272804614226038	0.0217686779856555	0.0527818480087459	0.0383368411702942
964	7 vs. 50	1	0.9991	0.9994	0.0244	0.9375	0.1111	1	0.998942612244898	0.998988244897959	0.0261798367346939	0.973154367346939	0.0477981224489796	1	0.000443190711999786	0.000438776826387494	0.00526656986503144	0.0241848423728632	0.0280526463759508
965	7 vs. 50	2	0.9957	0.9956	0.0393	0.9677	0.1389	2	0.997084244897959	0.997079102040816	0.0320324897959184	0.98314506122449	0.13334	2	0.00167378038871567	0.00167997748687571	0.00839505607048402	0.0172091595875419	0.019070642667847
966	7 vs. 50	3	0.9878	0.9779	0.0511	0.9524	0.4167	3	0.978327836734694	0.963547755102041	0.0622181224489796	0.938534775510204	0.40110987755102	3	0.0162470837193968	0.0272804614226038	0.0217686779856555	0.0527818480087459	0.0383368411702942
967	8 vs. 9	1	0.9981	0.9981	0.0342	0.9714	0.0278	1	0.998942612244898	0.998988244897959	0.0261798367346939	0.973154367346939	0.0477981224489796	1	0.000443190711999786	0.000438776826387494	0.00526656986503144	0.0241848423728632	0.0280526463759508
968	8 vs. 9	2	0.9973	0.9975	0.0311	0.9677	0.1389	2	0.997084244897959	0.997079102040816	0.0320324897959184	0.98314506122449	0.13334	2	0.00167378038871567	0.00167997748687571	0.00839505607048402	0.0172091595875419	0.019070642667847
969	8 vs. 9	3	0.9454	0.8972	0.1055	0.8182	0.3889	3	0.978327836734694	0.963547755102041	0.0622181224489796	0.938534775510204	0.40110987755102	3	0.0162470837193968	0.0272804614226038	0.0217686779856555	0.0527818480087459	0.0383368411702942
970	8 vs. 10	1	0.9984	0.9984	0.0317	0.9697	0.0833	1	0.998942612244898	0.998988244897959	0.0261798367346939	0.973154367346939	0.0477981224489796	1	0.000443190711999786	0.000438776826387494	0.00526656986503144	0.0241848423728632	0.0280526463759508
971	8 vs. 10	2	0.9964	0.9968	0.0365	1	0.1667	2	0.997084244897959	0.997079102040816	0.0320324897959184	0.98314506122449	0.13334	2	0.00167378038871567	0.00167997748687571	0.00839505607048402	0.0172091595875419	0.019070642667847
972	8 vs. 10	3	0.9665	0.9364	0.0821	0.8571	0.4167	3	0.978327836734694	0.963547755102041	0.0622181224489796	0.938534775510204	0.40110987755102	3	0.0162470837193968	0.0272804614226038	0.0217686779856555	0.0527818480087459	0.0383368411702942
973	8 vs. 11	1	0.9993	0.9993	0.0219	1	0.0556	1	0.998942612244898	0.998988244897959	0.0261798367346939	0.973154367346939	0.0477981224489796	1	0.000443190711999786	0.000438776826387494	0.00526656986503144	0.0241848423728632	0.0280526463759508
974	8 vs. 11	2	0.9967	0.9969	0.0343	1	0.1667	2	0.997084244897959	0.997079102040816	0.0320324897959184	0.98314506122449	0.13334	2	0.00167378038871567	0.00167997748687571	0.00839505607048402	0.0172091595875419	0.019070642667847
975	8 vs. 11	3	0.8581	0.7615	0.1659	0.7826	0.3611	3	0.978327836734694	0.963547755102041	0.0622181224489796	0.938534775510204	0.40110987755102	3	0.0162470837193968	0.0272804614226038	0.0217686779856555	0.0527818480087459	0.0383368411702942
976	8 vs. 12	1	0.9983	0.9983	0.0331	0.9714	0.0278	1	0.998942612244898	0.998988244897959	0.0261798367346939	0.973154367346939	0.0477981224489796	1	0.000443190711999786	0.000438776826387494	0.00526656986503144	0.0241848423728632	0.0280526463759508
977	8 vs. 12	2	0.9977	0.9982	0.029	1	0.1667	2	0.997084244897959	0.997079102040816	0.0320324897959184	0.98314506122449	0.13334	2	0.00167378038871567	0.00167997748687571	0.00839505607048402	0.0172091595875419	0.019070642667847
978	8 vs. 12	3	0.9777	0.9578	0.0661	0.9	0.4444	3	0.978327836734694	0.963547755102041	0.0622181224489796	0.938534775510204	0.40110987755102	3	0.0162470837193968	0.0272804614226038	0.0217686779856555	0.0527818480087459	0.0383368411702942
979	8 vs. 13	1	0.9975	0.9975	0.0401	0.9412	0.0556	1	0.998942612244898	0.998988244897959	0.0261798367346939	0.973154367346939	0.0477981224489796	1	0.000443190711999786	0.000438776826387494	0.00526656986503144	0.0241848423728632	0.0280526463759508
980	8 vs. 13	2	0.9983	0.9986	0.026	0.9677	0.1389	2	0.997084244897959	0.997079102040816	0.0320324897959184	0.98314506122449	0.13334	2	0.00167378038871567	0.00167997748687571	0.00839505607048402	0.0172091595875419	0.019070642667847
981	8 vs. 13	3	0.9562	0.924	0.0922	0.8571	0.4167	3	0.978327836734694	0.963547755102041	0.0622181224489796	0.938534775510204	0.40110987755102	3	0.0162470837193968	0.0272804614226038	0.0217686779856555	0.0527818480087459	0.0383368411702942
982	8 vs. 14	1	0.9982	0.9982	0.0338	0.9714	0.0278	1	0.998942612244898	0.998988244897959	0.0261798367346939	0.973154367346939	0.0477981224489796	1	0.000443190711999786	0.000438776826387494	0.00526656986503144	0.0241848423728632	0.0280526463759508
983	8 vs. 14	2	0.9973	0.9976	0.0311	0.9677	0.1389	2	0.997084244897959	0.997079102040816	0.0320324897959184	0.98314506122449	0.13334	2	0.00167378038871567	0.00167997748687571	0.00839505607048402	0.0172091595875419	0.019070642667847
984	8 vs. 14	3	0.9401	0.893	0.1091	0.7826	0.3611	3	0.978327836734694	0.963547755102041	0.0622181224489796	0.938534775510204	0.40110987755102	3	0.0162470837193968	0.0272804614226038	0.0217686779856555	0.0527818480087459	0.0383368411702942
985	8 vs. 15	1	0.9985	0.9985	0.0311	0.9412	0.0556	1	0.998942612244898	0.998988244897959	0.0261798367346939	0.973154367346939	0.0477981224489796	1	0.000443190711999786	0.000438776826387494	0.00526656986503144	0.0241848423728632	0.0280526463759508
986	8 vs. 15	2	0.9967	0.9966	0.0344	1	0.1667	2	0.997084244897959	0.997079102040816	0.0320324897959184	0.98314506122449	0.13334	2	0.00167378038871567	0.00167997748687571	0.00839505607048402	0.0172091595875419	0.019070642667847
987	8 vs. 15	3	0.9432	0.8901	0.1063	0.8182	0.3889	3	0.978327836734694	0.963547755102041	0.0622181224489796	0.938534775510204	0.40110987755102	3	0.0162470837193968	0.0272804614226038	0.0217686779856555	0.0527818480087459	0.0383368411702942
988	8 vs. 16	1	0.9986	0.9986	0.0302	1	0.0556	1	0.998942612244898	0.998988244897959	0.0261798367346939	0.973154367346939	0.0477981224489796	1	0.000443190711999786	0.000438776826387494	0.00526656986503144	0.0241848423728632	0.0280526463759508
989	8 vs. 16	2	0.9975	0.9976	0.0303	0.9677	0.1389	2	0.997084244897959	0.997079102040816	0.0320324897959184	0.98314506122449	0.13334	2	0.00167378038871567	0.00167997748687571	0.00839505607048402	0.0172091595875419	0.019070642667847
990	8 vs. 16	3	0.9316	0.8863	0.1164	0.7826	0.3611	3	0.978327836734694	0.963547755102041	0.0622181224489796	0.938534775510204	0.40110987755102	3	0.0162470837193968	0.0272804614226038	0.0217686779856555	0.0527818480087459	0.0383368411702942
991	8 vs. 17	1	0.9985	0.9985	0.0321	1	0.0556	1	0.998942612244898	0.998988244897959	0.0261798367346939	0.973154367346939	0.0477981224489796	1	0.000443190711999786	0.000438776826387494	0.00526656986503144	0.0241848423728632	0.0280526463759508
992	8 vs. 17	2	0.9935	0.9943	0.0482	0.9677	0.1389	2	0.997084244897959	0.997079102040816	0.0320324897959184	0.98314506122449	0.13334	2	0.00167378038871567	0.00167997748687571	0.00839505607048402	0.0172091595875419	0.019070642667847
993	8 vs. 17	3	0.9414	0.8871	0.1074	0.8182	0.3889	3	0.978327836734694	0.963547755102041	0.0622181224489796	0.938534775510204	0.40110987755102	3	0.0162470837193968	0.0272804614226038	0.0217686779856555	0.0527818480087459	0.0383368411702942
994	8 vs. 18	1	0.999	0.9991	0.0269	1	0.0556	1	0.998942612244898	0.998988244897959	0.0261798367346939	0.973154367346939	0.0477981224489796	1	0.000443190711999786	0.000438776826387494	0.00526656986503144	0.0241848423728632	0.0280526463759508
995	8 vs. 18	2	0.9937	0.9957	0.0476	1	0.1667	2	0.997084244897959	0.997079102040816	0.0320324897959184	0.98314506122449	0.13334	2	0.00167378038871567	0.00167997748687571	0.00839505607048402	0.0172091595875419	0.019070642667847
996	8 vs. 18	3	0.9609	0.9244	0.0892	0.8182	0.3889	3	0.978327836734694	0.963547755102041	0.0622181224489796	0.938534775510204	0.40110987755102	3	0.0162470837193968	0.0272804614226038	0.0217686779856555	0.0527818480087459	0.0383368411702942
997	8 vs. 19	1	0.9987	0.9988	0.0286	1	0.0556	1	0.998942612244898	0.998988244897959	0.0261798367346939	0.973154367346939	0.0477981224489796	1	0.000443190711999786	0.000438776826387494	0.00526656986503144	0.0241848423728632	0.0280526463759508
998	8 vs. 19	2	0.9969	0.9969	0.0335	0.9677	0.1389	2	0.997084244897959	0.997079102040816	0.0320324897959184	0.98314506122449	0.13334	2	0.00167378038871567	0.00167997748687571	0.00839505607048402	0.0172091595875419	0.019070642667847
999	8 vs. 19	3	0.9094	0.8649	0.1369	0.75	0.3333	3	0.978327836734694	0.963547755102041	0.0622181224489796	0.938534775510204	0.40110987755102	3	0.0162470837193968	0.0272804614226038	0.0217686779856555	0.0527818480087459	0.0383368411702942
1000	8 vs. 20	1	0.9984	0.9985	0.033	0.9714	0.0278	1	0.998942612244898	0.998988244897959	0.0261798367346939	0.973154367346939	0.0477981224489796	1	0.000443190711999786	0.000438776826387494	0.00526656986503144	0.0241848423728632	0.0280526463759508
1001	8 vs. 20	2	0.9958	0.9959	0.0391	0.9677	0.1389	2	0.997084244897959	0.997079102040816	0.0320324897959184	0.98314506122449	0.13334	2	0.00167378038871567	0.00167997748687571	0.00839505607048402	0.0172091595875419	0.019070642667847
1002	8 vs. 20	3	0.9475	0.8981	0.1023	0.8696	0.3611	3	0.978327836734694	0.963547755102041	0.0622181224489796	0.938534775510204	0.40110987755102	3	0.0162470837193968	0.0272804614226038	0.0217686779856555	0.0527818480087459	0.0383368411702942
1003	8 vs. 21	1	0.9982	0.9982	0.0349	0.9714	0.0278	1	0.998942612244898	0.998988244897959	0.0261798367346939	0.973154367346939	0.0477981224489796	1	0.000443190711999786	0.000438776826387494	0.00526656986503144	0.0241848423728632	0.0280526463759508
1004	8 vs. 21	2	0.9969	0.9972	0.0348	0.9677	0.1389	2	0.997084244897959	0.997079102040816	0.0320324897959184	0.98314506122449	0.13334	2	0.00167378038871567	0.00167997748687571	0.00839505607048402	0.0172091595875419	0.019070642667847
1005	8 vs. 21	3	0.9542	0.912	0.0968	0.8182	0.3889	3	0.978327836734694	0.963547755102041	0.0622181224489796	0.938534775510204	0.40110987755102	3	0.0162470837193968	0.0272804614226038	0.0217686779856555	0.0527818480087459	0.0383368411702942
1006	8 vs. 22	1	0.9977	0.9977	0.0377	1	0.0556	1	0.998942612244898	0.998988244897959	0.0261798367346939	0.973154367346939	0.0477981224489796	1	0.000443190711999786	0.000438776826387494	0.00526656986503144	0.0241848423728632	0.0280526463759508
1007	8 vs. 22	2	0.9962	0.9965	0.037	0.9677	0.1389	2	0.997084244897959	0.997079102040816	0.0320324897959184	0.98314506122449	0.13334	2	0.00167378038871567	0.00167997748687571	0.00839505607048402	0.0172091595875419	0.019070642667847
1008	8 vs. 22	3	0.9455	0.9007	0.104	0.8182	0.3889	3	0.978327836734694	0.963547755102041	0.0622181224489796	0.938534775510204	0.40110987755102	3	0.0162470837193968	0.0272804614226038	0.0217686779856555	0.0527818480087459	0.0383368411702942
1009	8 vs. 23	1	0.9985	0.9985	0.0319	1	0.0556	1	0.998942612244898	0.998988244897959	0.0261798367346939	0.973154367346939	0.0477981224489796	1	0.000443190711999786	0.000438776826387494	0.00526656986503144	0.0241848423728632	0.0280526463759508
1010	8 vs. 23	2	0.9967	0.9971	0.0351	0.9677	0.1389	2	0.997084244897959	0.997079102040816	0.0320324897959184	0.98314506122449	0.13334	2	0.00167378038871567	0.00167997748687571	0.00839505607048402	0.0172091595875419	0.019070642667847
1011	8 vs. 23	3	0.96	0.922	0.0892	0.8182	0.3889	3	0.978327836734694	0.963547755102041	0.0622181224489796	0.938534775510204	0.40110987755102	3	0.0162470837193968	0.0272804614226038	0.0217686779856555	0.0527818480087459	0.0383368411702942
1012	8 vs. 24	1	0.9989	0.9989	0.0267	0.9714	0.0278	1	0.998942612244898	0.998988244897959	0.0261798367346939	0.973154367346939	0.0477981224489796	1	0.000443190711999786	0.000438776826387494	0.00526656986503144	0.0241848423728632	0.0280526463759508
1013	8 vs. 24	2	0.9974	0.9979	0.0308	1	0.1667	2	0.997084244897959	0.997079102040816	0.0320324897959184	0.98314506122449	0.13334	2	0.00167378038871567	0.00167997748687571	0.00839505607048402	0.0172091595875419	0.019070642667847
1014	8 vs. 24	3	0.9635	0.9317	0.0842	0.8182	0.3889	3	0.978327836734694	0.963547755102041	0.0622181224489796	0.938534775510204	0.40110987755102	3	0.0162470837193968	0.0272804614226038	0.0217686779856555	0.0527818480087459	0.0383368411702942
1015	8 vs. 25	1	0.9988	0.9989	0.0272	0.9714	0.0278	1	0.998942612244898	0.998988244897959	0.0261798367346939	0.973154367346939	0.0477981224489796	1	0.000443190711999786	0.000438776826387494	0.00526656986503144	0.0241848423728632	0.0280526463759508
1016	8 vs. 25	2	0.9965	0.9973	0.0351	1	0.1667	2	0.997084244897959	0.997079102040816	0.0320324897959184	0.98314506122449	0.13334	2	0.00167378038871567	0.00167997748687571	0.00839505607048402	0.0172091595875419	0.019070642667847
1017	8 vs. 25	3	0.9442	0.8926	0.1081	0.8182	0.3889	3	0.978327836734694	0.963547755102041	0.0622181224489796	0.938534775510204	0.40110987755102	3	0.0162470837193968	0.0272804614226038	0.0217686779856555	0.0527818480087459	0.0383368411702942
1018	8 vs. 26	1	0.999	0.999	0.0256	0.9714	0.0278	1	0.998942612244898	0.998988244897959	0.0261798367346939	0.973154367346939	0.0477981224489796	1	0.000443190711999786	0.000438776826387494	0.00526656986503144	0.0241848423728632	0.0280526463759508
1019	8 vs. 26	2	0.9968	0.9971	0.0341	1	0.1667	2	0.997084244897959	0.997079102040816	0.0320324897959184	0.98314506122449	0.13334	2	0.00167378038871567	0.00167997748687571	0.00839505607048402	0.0172091595875419	0.019070642667847
1020	8 vs. 26	3	0.9666	0.9362	0.0835	0.8182	0.3889	3	0.978327836734694	0.963547755102041	0.0622181224489796	0.938534775510204	0.40110987755102	3	0.0162470837193968	0.0272804614226038	0.0217686779856555	0.0527818480087459	0.0383368411702942
1021	8 vs. 27	1	0.9975	0.9975	0.0393	0.9697	0.0833	1	0.998942612244898	0.998988244897959	0.0261798367346939	0.973154367346939	0.0477981224489796	1	0.000443190711999786	0.000438776826387494	0.00526656986503144	0.0241848423728632	0.0280526463759508
1022	8 vs. 27	2	0.9965	0.9964	0.0356	0.9677	0.1389	2	0.997084244897959	0.997079102040816	0.0320324897959184	0.98314506122449	0.13334	2	0.00167378038871567	0.00167997748687571	0.00839505607048402	0.0172091595875419	0.019070642667847
1023	8 vs. 27	3	0.9517	0.9249	0.0969	0.8	0.4444	3	0.978327836734694	0.963547755102041	0.0622181224489796	0.938534775510204	0.40110987755102	3	0.0162470837193968	0.0272804614226038	0.0217686779856555	0.0527818480087459	0.0383368411702942
1024	8 vs. 28	1	0.9974	0.9974	0.0408	0.9714	0.0278	1	0.998942612244898	0.998988244897959	0.0261798367346939	0.973154367346939	0.0477981224489796	1	0.000443190711999786	0.000438776826387494	0.00526656986503144	0.0241848423728632	0.0280526463759508
1025	8 vs. 28	2	0.9968	0.9967	0.0336	0.9677	0.1389	2	0.997084244897959	0.997079102040816	0.0320324897959184	0.98314506122449	0.13334	2	0.00167378038871567	0.00167997748687571	0.00839505607048402	0.0172091595875419	0.019070642667847
1026	8 vs. 28	3	0.964	0.9312	0.0837	0.8571	0.4167	3	0.978327836734694	0.963547755102041	0.0622181224489796	0.938534775510204	0.40110987755102	3	0.0162470837193968	0.0272804614226038	0.0217686779856555	0.0527818480087459	0.0383368411702942
1027	8 vs. 29	1	0.9992	0.9993	0.0229	1	0.0556	1	0.998942612244898	0.998988244897959	0.0261798367346939	0.973154367346939	0.0477981224489796	1	0.000443190711999786	0.000438776826387494	0.00526656986503144	0.0241848423728632	0.0280526463759508
1028	8 vs. 29	2	0.9979	0.998	0.0272	0.9677	0.1389	2	0.997084244897959	0.997079102040816	0.0320324897959184	0.98314506122449	0.13334	2	0.00167378038871567	0.00167997748687571	0.00839505607048402	0.0172091595875419	0.019070642667847
1029	8 vs. 29	3	0.9022	0.8312	0.1378	0.8182	0.3889	3	0.978327836734694	0.963547755102041	0.0622181224489796	0.938534775510204	0.40110987755102	3	0.0162470837193968	0.0272804614226038	0.0217686779856555	0.0527818480087459	0.0383368411702942
1030	8 vs. 30	1	0.9989	0.9989	0.027	0.9714	0.0278	1	0.998942612244898	0.998988244897959	0.0261798367346939	0.973154367346939	0.0477981224489796	1	0.000443190711999786	0.000438776826387494	0.00526656986503144	0.0241848423728632	0.0280526463759508
1031	8 vs. 30	2	0.9975	0.9977	0.0303	1	0.1667	2	0.997084244897959	0.997079102040816	0.0320324897959184	0.98314506122449	0.13334	2	0.00167378038871567	0.00167997748687571	0.00839505607048402	0.0172091595875419	0.019070642667847
1032	8 vs. 30	3	0.9849	0.971	0.0545	0.9	0.4444	3	0.978327836734694	0.963547755102041	0.0622181224489796	0.938534775510204	0.40110987755102	3	0.0162470837193968	0.0272804614226038	0.0217686779856555	0.0527818480087459	0.0383368411702942
1033	8 vs. 31	1	0.9978	0.9977	0.0386	0.9412	0.0556	1	0.998942612244898	0.998988244897959	0.0261798367346939	0.973154367346939	0.0477981224489796	1	0.000443190711999786	0.000438776826387494	0.00526656986503144	0.0241848423728632	0.0280526463759508
1034	8 vs. 31	2	0.996	0.9966	0.0383	0.9677	0.1389	2	0.997084244897959	0.997079102040816	0.0320324897959184	0.98314506122449	0.13334	2	0.00167378038871567	0.00167997748687571	0.00839505607048402	0.0172091595875419	0.019070642667847
1035	8 vs. 31	3	0.9631	0.9329	0.085	0.8571	0.4167	3	0.978327836734694	0.963547755102041	0.0622181224489796	0.938534775510204	0.40110987755102	3	0.0162470837193968	0.0272804614226038	0.0217686779856555	0.0527818480087459	0.0383368411702942
1036	8 vs. 32	1	0.9983	0.9984	0.0322	1	0.0556	1	0.998942612244898	0.998988244897959	0.0261798367346939	0.973154367346939	0.0477981224489796	1	0.000443190711999786	0.000438776826387494	0.00526656986503144	0.0241848423728632	0.0280526463759508
1037	8 vs. 32	2	0.9969	0.9973	0.0356	0.9677	0.1389	2	0.997084244897959	0.997079102040816	0.0320324897959184	0.98314506122449	0.13334	2	0.00167378038871567	0.00167997748687571	0.00839505607048402	0.0172091595875419	0.019070642667847
1038	8 vs. 32	3	0.9585	0.9271	0.0906	0.7826	0.3611	3	0.978327836734694	0.963547755102041	0.0622181224489796	0.938534775510204	0.40110987755102	3	0.0162470837193968	0.0272804614226038	0.0217686779856555	0.0527818480087459	0.0383368411702942
1039	8 vs. 33	1	0.9977	0.9977	0.038	0.9375	0.1111	1	0.998942612244898	0.998988244897959	0.0261798367346939	0.973154367346939	0.0477981224489796	1	0.000443190711999786	0.000438776826387494	0.00526656986503144	0.0241848423728632	0.0280526463759508
1040	8 vs. 33	2	0.9934	0.9934	0.0485	0.9333	0.1667	2	0.997084244897959	0.997079102040816	0.0320324897959184	0.98314506122449	0.13334	2	0.00167378038871567	0.00167997748687571	0.00839505607048402	0.0172091595875419	0.019070642667847
1041	8 vs. 33	3	0.9721	0.9462	0.0739	0.9	0.4444	3	0.978327836734694	0.963547755102041	0.0622181224489796	0.938534775510204	0.40110987755102	3	0.0162470837193968	0.0272804614226038	0.0217686779856555	0.0527818480087459	0.0383368411702942
1042	8 vs. 34	1	0.9989	0.9989	0.0268	1	0.0556	1	0.998942612244898	0.998988244897959	0.0261798367346939	0.973154367346939	0.0477981224489796	1	0.000443190711999786	0.000438776826387494	0.00526656986503144	0.0241848423728632	0.0280526463759508
1043	8 vs. 34	2	0.9971	0.9972	0.032	0.9677	0.1389	2	0.997084244897959	0.997079102040816	0.0320324897959184	0.98314506122449	0.13334	2	0.00167378038871567	0.00167997748687571	0.00839505607048402	0.0172091595875419	0.019070642667847
1044	8 vs. 34	3	0.934	0.878	0.1139	0.8182	0.3889	3	0.978327836734694	0.963547755102041	0.0622181224489796	0.938534775510204	0.40110987755102	3	0.0162470837193968	0.0272804614226038	0.0217686779856555	0.0527818480087459	0.0383368411702942
1045	8 vs. 35	1	0.9987	0.9987	0.029	1	0.0556	1	0.998942612244898	0.998988244897959	0.0261798367346939	0.973154367346939	0.0477981224489796	1	0.000443190711999786	0.000438776826387494	0.00526656986503144	0.0241848423728632	0.0280526463759508
1046	8 vs. 35	2	0.9963	0.9964	0.0372	1	0.1667	2	0.997084244897959	0.997079102040816	0.0320324897959184	0.98314506122449	0.13334	2	0.00167378038871567	0.00167997748687571	0.00839505607048402	0.0172091595875419	0.019070642667847
1047	8 vs. 35	3	0.9338	0.8803	0.1138	0.8182	0.3889	3	0.978327836734694	0.963547755102041	0.0622181224489796	0.938534775510204	0.40110987755102	3	0.0162470837193968	0.0272804614226038	0.0217686779856555	0.0527818480087459	0.0383368411702942
1048	8 vs. 36	1	0.9975	0.9975	0.0395	1	0.0556	1	0.998942612244898	0.998988244897959	0.0261798367346939	0.973154367346939	0.0477981224489796	1	0.000443190711999786	0.000438776826387494	0.00526656986503144	0.0241848423728632	0.0280526463759508
1049	8 vs. 36	2	0.9972	0.9973	0.0325	0.9677	0.1389	2	0.997084244897959	0.997079102040816	0.0320324897959184	0.98314506122449	0.13334	2	0.00167378038871567	0.00167997748687571	0.00839505607048402	0.0172091595875419	0.019070642667847
1050	8 vs. 36	3	0.9432	0.8978	0.1045	0.7826	0.3611	3	0.978327836734694	0.963547755102041	0.0622181224489796	0.938534775510204	0.40110987755102	3	0.0162470837193968	0.0272804614226038	0.0217686779856555	0.0527818480087459	0.0383368411702942
1051	8 vs. 37	1	0.9987	0.9987	0.0288	0.9697	0.0833	1	0.998942612244898	0.998988244897959	0.0261798367346939	0.973154367346939	0.0477981224489796	1	0.000443190711999786	0.000438776826387494	0.00526656986503144	0.0241848423728632	0.0280526463759508
1052	8 vs. 37	2	0.9966	0.9969	0.0348	1	0.1667	2	0.997084244897959	0.997079102040816	0.0320324897959184	0.98314506122449	0.13334	2	0.00167378038871567	0.00167997748687571	0.00839505607048402	0.0172091595875419	0.019070642667847
1053	8 vs. 37	3	0.9771	0.956	0.0672	0.8571	0.4167	3	0.978327836734694	0.963547755102041	0.0622181224489796	0.938534775510204	0.40110987755102	3	0.0162470837193968	0.0272804614226038	0.0217686779856555	0.0527818480087459	0.0383368411702942
1054	8 vs. 38	1	0.9992	0.9993	0.027	1	0.0556	1	0.998942612244898	0.998988244897959	0.0261798367346939	0.973154367346939	0.0477981224489796	1	0.000443190711999786	0.000438776826387494	0.00526656986503144	0.0241848423728632	0.0280526463759508
1055	8 vs. 38	2	0.996	0.9966	0.0376	0.9677	0.1389	2	0.997084244897959	0.997079102040816	0.0320324897959184	0.98314506122449	0.13334	2	0.00167378038871567	0.00167997748687571	0.00839505607048402	0.0172091595875419	0.019070642667847
1056	8 vs. 38	3	0.9733	0.9505	0.0723	0.9	0.4444	3	0.978327836734694	0.963547755102041	0.0622181224489796	0.938534775510204	0.40110987755102	3	0.0162470837193968	0.0272804614226038	0.0217686779856555	0.0527818480087459	0.0383368411702942
1057	8 vs. 39	1	0.9987	0.9987	0.0288	1	0.0556	1	0.998942612244898	0.998988244897959	0.0261798367346939	0.973154367346939	0.0477981224489796	1	0.000443190711999786	0.000438776826387494	0.00526656986503144	0.0241848423728632	0.0280526463759508
1058	8 vs. 39	2	0.9983	0.9985	0.0242	1	0.1667	2	0.997084244897959	0.997079102040816	0.0320324897959184	0.98314506122449	0.13334	2	0.00167378038871567	0.00167997748687571	0.00839505607048402	0.0172091595875419	0.019070642667847
1059	8 vs. 39	3	0.9596	0.9254	0.0891	0.8182	0.3889	3	0.978327836734694	0.963547755102041	0.0622181224489796	0.938534775510204	0.40110987755102	3	0.0162470837193968	0.0272804614226038	0.0217686779856555	0.0527818480087459	0.0383368411702942
1060	8 vs. 40	1	0.9985	0.9985	0.0309	1	0.0556	1	0.998942612244898	0.998988244897959	0.0261798367346939	0.973154367346939	0.0477981224489796	1	0.000443190711999786	0.000438776826387494	0.00526656986503144	0.0241848423728632	0.0280526463759508
1061	8 vs. 40	2	0.9957	0.9959	0.0393	0.9677	0.1389	2	0.997084244897959	0.997079102040816	0.0320324897959184	0.98314506122449	0.13334	2	0.00167378038871567	0.00167997748687571	0.00839505607048402	0.0172091595875419	0.019070642667847
1062	8 vs. 40	3	0.9705	0.9461	0.0765	0.9	0.4444	3	0.978327836734694	0.963547755102041	0.0622181224489796	0.938534775510204	0.40110987755102	3	0.0162470837193968	0.0272804614226038	0.0217686779856555	0.0527818480087459	0.0383368411702942
1063	8 vs. 41	1	0.9979	0.9979	0.037	0.9714	0.0278	1	0.998942612244898	0.998988244897959	0.0261798367346939	0.973154367346939	0.0477981224489796	1	0.000443190711999786	0.000438776826387494	0.00526656986503144	0.0241848423728632	0.0280526463759508
1064	8 vs. 41	2	0.9977	0.998	0.0289	1	0.1667	2	0.997084244897959	0.997079102040816	0.0320324897959184	0.98314506122449	0.13334	2	0.00167378038871567	0.00167997748687571	0.00839505607048402	0.0172091595875419	0.019070642667847
1065	8 vs. 41	3	0.9452	0.8982	0.1037	0.7826	0.3611	3	0.978327836734694	0.963547755102041	0.0622181224489796	0.938534775510204	0.40110987755102	3	0.0162470837193968	0.0272804614226038	0.0217686779856555	0.0527818480087459	0.0383368411702942
1066	8 vs. 42	1	0.9987	0.9987	0.0304	0.9714	0.0278	1	0.998942612244898	0.998988244897959	0.0261798367346939	0.973154367346939	0.0477981224489796	1	0.000443190711999786	0.000438776826387494	0.00526656986503144	0.0241848423728632	0.0280526463759508
1067	8 vs. 42	2	0.9919	0.992	0.0546	0.9677	0.1389	2	0.997084244897959	0.997079102040816	0.0320324897959184	0.98314506122449	0.13334	2	0.00167378038871567	0.00167997748687571	0.00839505607048402	0.0172091595875419	0.019070642667847
1068	8 vs. 42	3	0.931	0.8763	0.1164	0.8571	0.4167	3	0.978327836734694	0.963547755102041	0.0622181224489796	0.938534775510204	0.40110987755102	3	0.0162470837193968	0.0272804614226038	0.0217686779856555	0.0527818480087459	0.0383368411702942
1069	8 vs. 43	1	0.9993	0.9993	0.0215	1	0.0556	1	0.998942612244898	0.998988244897959	0.0261798367346939	0.973154367346939	0.0477981224489796	1	0.000443190711999786	0.000438776826387494	0.00526656986503144	0.0241848423728632	0.0280526463759508
1070	8 vs. 43	2	0.9976	0.9976	0.0298	0.9677	0.1389	2	0.997084244897959	0.997079102040816	0.0320324897959184	0.98314506122449	0.13334	2	0.00167378038871567	0.00167997748687571	0.00839505607048402	0.0172091595875419	0.019070642667847
1071	8 vs. 43	3	0.981	0.9635	0.061	0.9	0.4444	3	0.978327836734694	0.963547755102041	0.0622181224489796	0.938534775510204	0.40110987755102	3	0.0162470837193968	0.0272804614226038	0.0217686779856555	0.0527818480087459	0.0383368411702942
1072	8 vs. 44	1	0.998	0.9981	0.0362	1	0.0556	1	0.998942612244898	0.998988244897959	0.0261798367346939	0.973154367346939	0.0477981224489796	1	0.000443190711999786	0.000438776826387494	0.00526656986503144	0.0241848423728632	0.0280526463759508
1073	8 vs. 44	2	0.9963	0.9966	0.0364	0.9677	0.1389	2	0.997084244897959	0.997079102040816	0.0320324897959184	0.98314506122449	0.13334	2	0.00167378038871567	0.00167997748687571	0.00839505607048402	0.0172091595875419	0.019070642667847
1074	8 vs. 44	3	0.8972	0.8157	0.1427	0.8182	0.3889	3	0.978327836734694	0.963547755102041	0.0622181224489796	0.938534775510204	0.40110987755102	3	0.0162470837193968	0.0272804614226038	0.0217686779856555	0.0527818480087459	0.0383368411702942
1075	8 vs. 45	1	0.9989	0.9989	0.0269	1	0.0556	1	0.998942612244898	0.998988244897959	0.0261798367346939	0.973154367346939	0.0477981224489796	1	0.000443190711999786	0.000438776826387494	0.00526656986503144	0.0241848423728632	0.0280526463759508
1076	8 vs. 45	2	0.9961	0.9964	0.0384	0.9677	0.1389	2	0.997084244897959	0.997079102040816	0.0320324897959184	0.98314506122449	0.13334	2	0.00167378038871567	0.00167997748687571	0.00839505607048402	0.0172091595875419	0.019070642667847
1077	8 vs. 45	3	0.9468	0.8985	0.1024	0.8182	0.3889	3	0.978327836734694	0.963547755102041	0.0622181224489796	0.938534775510204	0.40110987755102	3	0.0162470837193968	0.0272804614226038	0.0217686779856555	0.0527818480087459	0.0383368411702942
1078	8 vs. 46	1	0.9986	0.9986	0.0297	0.9697	0.0833	1	0.998942612244898	0.998988244897959	0.0261798367346939	0.973154367346939	0.0477981224489796	1	0.000443190711999786	0.000438776826387494	0.00526656986503144	0.0241848423728632	0.0280526463759508
1079	8 vs. 46	2	0.9971	0.998	0.0324	1	0.1667	2	0.997084244897959	0.997079102040816	0.0320324897959184	0.98314506122449	0.13334	2	0.00167378038871567	0.00167997748687571	0.00839505607048402	0.0172091595875419	0.019070642667847
1080	8 vs. 46	3	0.9693	0.9421	0.0777	0.8571	0.4167	3	0.978327836734694	0.963547755102041	0.0622181224489796	0.938534775510204	0.40110987755102	3	0.0162470837193968	0.0272804614226038	0.0217686779856555	0.0527818480087459	0.0383368411702942
1081	8 vs. 47	1	0.9986	0.9986	0.0302	1	0.0556	1	0.998942612244898	0.998988244897959	0.0261798367346939	0.973154367346939	0.0477981224489796	1	0.000443190711999786	0.000438776826387494	0.00526656986503144	0.0241848423728632	0.0280526463759508
1082	8 vs. 47	2	0.9978	0.9982	0.0279	1	0.1667	2	0.997084244897959	0.997079102040816	0.0320324897959184	0.98314506122449	0.13334	2	0.00167378038871567	0.00167997748687571	0.00839505607048402	0.0172091595875419	0.019070642667847
1083	8 vs. 47	3	0.9626	0.9308	0.0861	0.8182	0.3889	3	0.978327836734694	0.963547755102041	0.0622181224489796	0.938534775510204	0.40110987755102	3	0.0162470837193968	0.0272804614226038	0.0217686779856555	0.0527818480087459	0.0383368411702942
1084	8 vs. 48	1	0.9986	0.9986	0.0301	0.9412	0.0556	1	0.998942612244898	0.998988244897959	0.0261798367346939	0.973154367346939	0.0477981224489796	1	0.000443190711999786	0.000438776826387494	0.00526656986503144	0.0241848423728632	0.0280526463759508
1085	8 vs. 48	2	0.9969	0.9969	0.0348	0.9677	0.1389	2	0.997084244897959	0.997079102040816	0.0320324897959184	0.98314506122449	0.13334	2	0.00167378038871567	0.00167997748687571	0.00839505607048402	0.0172091595875419	0.019070642667847
1086	8 vs. 48	3	0.9457	0.9018	0.1029	0.8182	0.3889	3	0.978327836734694	0.963547755102041	0.0622181224489796	0.938534775510204	0.40110987755102	3	0.0162470837193968	0.0272804614226038	0.0217686779856555	0.0527818480087459	0.0383368411702942
1087	8 vs. 49	1	0.9989	0.9989	0.0269	0.9714	0.0278	1	0.998942612244898	0.998988244897959	0.0261798367346939	0.973154367346939	0.0477981224489796	1	0.000443190711999786	0.000438776826387494	0.00526656986503144	0.0241848423728632	0.0280526463759508
1088	8 vs. 49	2	0.9963	0.9968	0.037	1	0.1667	2	0.997084244897959	0.997079102040816	0.0320324897959184	0.98314506122449	0.13334	2	0.00167378038871567	0.00167997748687571	0.00839505607048402	0.0172091595875419	0.019070642667847
1089	8 vs. 49	3	0.9226	0.8583	0.126	0.8182	0.3889	3	0.978327836734694	0.963547755102041	0.0622181224489796	0.938534775510204	0.40110987755102	3	0.0162470837193968	0.0272804614226038	0.0217686779856555	0.0527818480087459	0.0383368411702942
1090	8 vs. 50	1	0.9986	0.9987	0.0297	0.9375	0.1111	1	0.998942612244898	0.998988244897959	0.0261798367346939	0.973154367346939	0.0477981224489796	1	0.000443190711999786	0.000438776826387494	0.00526656986503144	0.0241848423728632	0.0280526463759508
1091	8 vs. 50	2	0.9938	0.994	0.0472	0.9677	0.1389	2	0.997084244897959	0.997079102040816	0.0320324897959184	0.98314506122449	0.13334	2	0.00167378038871567	0.00167997748687571	0.00839505607048402	0.0172091595875419	0.019070642667847
1092	8 vs. 50	3	0.9614	0.926	0.0871	0.8571	0.4167	3	0.978327836734694	0.963547755102041	0.0622181224489796	0.938534775510204	0.40110987755102	3	0.0162470837193968	0.0272804614226038	0.0217686779856555	0.0527818480087459	0.0383368411702942
1093	9 vs. 10	1	0.9996	0.9996	0.0185	0.9412	0.0556	1	0.998942612244898	0.998988244897959	0.0261798367346939	0.973154367346939	0.0477981224489796	1	0.000443190711999786	0.000438776826387494	0.00526656986503144	0.0241848423728632	0.0280526463759508
1094	9 vs. 10	2	0.9984	0.9984	0.0244	0.9677	0.1389	2	0.997084244897959	0.997079102040816	0.0320324897959184	0.98314506122449	0.13334	2	0.00167378038871567	0.00167997748687571	0.00839505607048402	0.0172091595875419	0.019070642667847
1095	9 vs. 10	3	0.9742	0.9516	0.073	0.9524	0.4167	3	0.978327836734694	0.963547755102041	0.0622181224489796	0.938534775510204	0.40110987755102	3	0.0162470837193968	0.0272804614226038	0.0217686779856555	0.0527818480087459	0.0383368411702942
1096	9 vs. 11	1	0.999	0.999	0.0266	0.9714	0.0278	1	0.998942612244898	0.998988244897959	0.0261798367346939	0.973154367346939	0.0477981224489796	1	0.000443190711999786	0.000438776826387494	0.00526656986503144	0.0241848423728632	0.0280526463759508
1097	9 vs. 11	2	0.9981	0.998	0.0268	0.9677	0.1389	2	0.997084244897959	0.997079102040816	0.0320324897959184	0.98314506122449	0.13334	2	0.00167378038871567	0.00167997748687571	0.00839505607048402	0.0172091595875419	0.019070642667847
1098	9 vs. 11	3	0.97	0.9552	0.0784	0.9565	0.3611	3	0.978327836734694	0.963547755102041	0.0622181224489796	0.938534775510204	0.40110987755102	3	0.0162470837193968	0.0272804614226038	0.0217686779856555	0.0527818480087459	0.0383368411702942
1099	9 vs. 12	1	0.999	0.9991	0.0256	1	0	1	0.998942612244898	0.998988244897959	0.0261798367346939	0.973154367346939	0.0477981224489796	1	0.000443190711999786	0.000438776826387494	0.00526656986503144	0.0241848423728632	0.0280526463759508
1100	9 vs. 12	2	0.9988	0.9987	0.0217	0.9677	0.1389	2	0.997084244897959	0.997079102040816	0.0320324897959184	0.98314506122449	0.13334	2	0.00167378038871567	0.00167997748687571	0.00839505607048402	0.0172091595875419	0.019070642667847
1101	9 vs. 12	3	0.9654	0.9353	0.0842	0.9	0.4444	3	0.978327836734694	0.963547755102041	0.0622181224489796	0.938534775510204	0.40110987755102	3	0.0162470837193968	0.0272804614226038	0.0217686779856555	0.0527818480087459	0.0383368411702942
1102	9 vs. 13	1	0.9979	0.9979	0.0369	0.9714	0.0278	1	0.998942612244898	0.998988244897959	0.0261798367346939	0.973154367346939	0.0477981224489796	1	0.000443190711999786	0.000438776826387494	0.00526656986503144	0.0241848423728632	0.0280526463759508
1103	9 vs. 13	2	0.9984	0.9983	0.0248	1	0.1111	2	0.997084244897959	0.997079102040816	0.0320324897959184	0.98314506122449	0.13334	2	0.00167378038871567	0.00167997748687571	0.00839505607048402	0.0172091595875419	0.019070642667847
1104	9 vs. 13	3	0.9861	0.9772	0.0549	0.9524	0.4167	3	0.978327836734694	0.963547755102041	0.0622181224489796	0.938534775510204	0.40110987755102	3	0.0162470837193968	0.0272804614226038	0.0217686779856555	0.0527818480087459	0.0383368411702942
1105	9 vs. 14	1	0.9986	0.9986	0.0303	1	0	1	0.998942612244898	0.998988244897959	0.0261798367346939	0.973154367346939	0.0477981224489796	1	0.000443190711999786	0.000438776826387494	0.00526656986503144	0.0241848423728632	0.0280526463759508
1106	9 vs. 14	2	0.9985	0.9984	0.0235	1	0.1111	2	0.997084244897959	0.997079102040816	0.0320324897959184	0.98314506122449	0.13334	2	0.00167378038871567	0.00167997748687571	0.00839505607048402	0.0172091595875419	0.019070642667847
1107	9 vs. 14	3	0.9949	0.992	0.0329	0.9565	0.3611	3	0.978327836734694	0.963547755102041	0.0622181224489796	0.938534775510204	0.40110987755102	3	0.0162470837193968	0.0272804614226038	0.0217686779856555	0.0527818480087459	0.0383368411702942
1108	9 vs. 15	1	0.9987	0.9987	0.0285	0.9714	0.0278	1	0.998942612244898	0.998988244897959	0.0261798367346939	0.973154367346939	0.0477981224489796	1	0.000443190711999786	0.000438776826387494	0.00526656986503144	0.0241848423728632	0.0280526463759508
1109	9 vs. 15	2	0.9985	0.9986	0.0234	0.9677	0.1389	2	0.997084244897959	0.997079102040816	0.0320324897959184	0.98314506122449	0.13334	2	0.00167378038871567	0.00167997748687571	0.00839505607048402	0.0172091595875419	0.019070642667847
1110	9 vs. 15	3	0.9846	0.9713	0.0564	1	0.3889	3	0.978327836734694	0.963547755102041	0.0622181224489796	0.938534775510204	0.40110987755102	3	0.0162470837193968	0.0272804614226038	0.0217686779856555	0.0527818480087459	0.0383368411702942
1111	9 vs. 16	1	0.9989	0.9989	0.027	0.9714	0.0278	1	0.998942612244898	0.998988244897959	0.0261798367346939	0.973154367346939	0.0477981224489796	1	0.000443190711999786	0.000438776826387494	0.00526656986503144	0.0241848423728632	0.0280526463759508
1112	9 vs. 16	2	0.9979	0.9978	0.028	1	0.1111	2	0.997084244897959	0.997079102040816	0.0320324897959184	0.98314506122449	0.13334	2	0.00167378038871567	0.00167997748687571	0.00839505607048402	0.0172091595875419	0.019070642667847
1113	9 vs. 16	3	0.9904	0.9884	0.0446	0.9565	0.3611	3	0.978327836734694	0.963547755102041	0.0622181224489796	0.938534775510204	0.40110987755102	3	0.0162470837193968	0.0272804614226038	0.0217686779856555	0.0527818480087459	0.0383368411702942
1114	9 vs. 17	1	0.9986	0.9986	0.0321	0.9714	0.0278	1	0.998942612244898	0.998988244897959	0.0261798367346939	0.973154367346939	0.0477981224489796	1	0.000443190711999786	0.000438776826387494	0.00526656986503144	0.0241848423728632	0.0280526463759508
1115	9 vs. 17	2	0.9957	0.9957	0.0392	1	0.1111	2	0.997084244897959	0.997079102040816	0.0320324897959184	0.98314506122449	0.13334	2	0.00167378038871567	0.00167997748687571	0.00839505607048402	0.0172091595875419	0.019070642667847
1116	9 vs. 17	3	0.988	0.9776	0.0501	1	0.3889	3	0.978327836734694	0.963547755102041	0.0622181224489796	0.938534775510204	0.40110987755102	3	0.0162470837193968	0.0272804614226038	0.0217686779856555	0.0527818480087459	0.0383368411702942
1117	9 vs. 18	1	0.9985	0.9986	0.0341	0.9714	0.0278	1	0.998942612244898	0.998988244897959	0.0261798367346939	0.973154367346939	0.0477981224489796	1	0.000443190711999786	0.000438776826387494	0.00526656986503144	0.0241848423728632	0.0280526463759508
1118	9 vs. 18	2	0.994	0.9946	0.0463	0.9677	0.1389	2	0.997084244897959	0.997079102040816	0.0320324897959184	0.98314506122449	0.13334	2	0.00167378038871567	0.00167997748687571	0.00839505607048402	0.0172091595875419	0.019070642667847
1119	9 vs. 18	3	0.9906	0.983	0.0442	1	0.3889	3	0.978327836734694	0.963547755102041	0.0622181224489796	0.938534775510204	0.40110987755102	3	0.0162470837193968	0.0272804614226038	0.0217686779856555	0.0527818480087459	0.0383368411702942
1120	9 vs. 19	1	0.9976	0.9977	0.0395	0.9714	0.0278	1	0.998942612244898	0.998988244897959	0.0261798367346939	0.973154367346939	0.0477981224489796	1	0.000443190711999786	0.000438776826387494	0.00526656986503144	0.0241848423728632	0.0280526463759508
1121	9 vs. 19	2	0.9967	0.9966	0.0344	1	0.1111	2	0.997084244897959	0.997079102040816	0.0320324897959184	0.98314506122449	0.13334	2	0.00167378038871567	0.00167997748687571	0.00839505607048402	0.0172091595875419	0.019070642667847
1122	9 vs. 19	3	0.9798	0.9811	0.0652	0.9167	0.3333	3	0.978327836734694	0.963547755102041	0.0622181224489796	0.938534775510204	0.40110987755102	3	0.0162470837193968	0.0272804614226038	0.0217686779856555	0.0527818480087459	0.0383368411702942
1123	9 vs. 20	1	0.9981	0.9983	0.0365	1	0	1	0.998942612244898	0.998988244897959	0.0261798367346939	0.973154367346939	0.0477981224489796	1	0.000443190711999786	0.000438776826387494	0.00526656986503144	0.0241848423728632	0.0280526463759508
1124	9 vs. 20	2	0.9975	0.9973	0.031	1	0.1111	2	0.997084244897959	0.997079102040816	0.0320324897959184	0.98314506122449	0.13334	2	0.00167378038871567	0.00167997748687571	0.00839505607048402	0.0172091595875419	0.019070642667847
1125	9 vs. 20	3	0.9758	0.9547	0.0704	0.9565	0.3611	3	0.978327836734694	0.963547755102041	0.0622181224489796	0.938534775510204	0.40110987755102	3	0.0162470837193968	0.0272804614226038	0.0217686779856555	0.0527818480087459	0.0383368411702942
1126	9 vs. 21	1	0.9993	0.9993	0.0248	1	0	1	0.998942612244898	0.998988244897959	0.0261798367346939	0.973154367346939	0.0477981224489796	1	0.000443190711999786	0.000438776826387494	0.00526656986503144	0.0241848423728632	0.0280526463759508
1127	9 vs. 21	2	0.9989	0.9988	0.0231	1	0.1111	2	0.997084244897959	0.997079102040816	0.0320324897959184	0.98314506122449	0.13334	2	0.00167378038871567	0.00167997748687571	0.00839505607048402	0.0172091595875419	0.019070642667847
1128	9 vs. 21	3	0.9815	0.9653	0.0621	1	0.3889	3	0.978327836734694	0.963547755102041	0.0622181224489796	0.938534775510204	0.40110987755102	3	0.0162470837193968	0.0272804614226038	0.0217686779856555	0.0527818480087459	0.0383368411702942
1129	9 vs. 22	1	0.998	0.998	0.0355	0.9714	0.0278	1	0.998942612244898	0.998988244897959	0.0261798367346939	0.973154367346939	0.0477981224489796	1	0.000443190711999786	0.000438776826387494	0.00526656986503144	0.0241848423728632	0.0280526463759508
1130	9 vs. 22	2	0.9984	0.9983	0.024	1	0.1111	2	0.997084244897959	0.997079102040816	0.0320324897959184	0.98314506122449	0.13334	2	0.00167378038871567	0.00167997748687571	0.00839505607048402	0.0172091595875419	0.019070642667847
1131	9 vs. 22	3	0.9865	0.9759	0.0528	1	0.3889	3	0.978327836734694	0.963547755102041	0.0622181224489796	0.938534775510204	0.40110987755102	3	0.0162470837193968	0.0272804614226038	0.0217686779856555	0.0527818480087459	0.0383368411702942
1132	9 vs. 23	1	0.9992	0.9992	0.0242	0.9714	0.0278	1	0.998942612244898	0.998988244897959	0.0261798367346939	0.973154367346939	0.0477981224489796	1	0.000443190711999786	0.000438776826387494	0.00526656986503144	0.0241848423728632	0.0280526463759508
1133	9 vs. 23	2	0.9992	0.9992	0.0201	1	0.1111	2	0.997084244897959	0.997079102040816	0.0320324897959184	0.98314506122449	0.13334	2	0.00167378038871567	0.00167997748687571	0.00839505607048402	0.0172091595875419	0.019070642667847
1134	9 vs. 23	3	0.9835	0.9701	0.0583	1	0.3889	3	0.978327836734694	0.963547755102041	0.0622181224489796	0.938534775510204	0.40110987755102	3	0.0162470837193968	0.0272804614226038	0.0217686779856555	0.0527818480087459	0.0383368411702942
1135	9 vs. 24	1	0.9987	0.9987	0.0297	1	0	1	0.998942612244898	0.998988244897959	0.0261798367346939	0.973154367346939	0.0477981224489796	1	0.000443190711999786	0.000438776826387494	0.00526656986503144	0.0241848423728632	0.0280526463759508
1136	9 vs. 24	2	0.9982	0.9981	0.0257	0.9677	0.1389	2	0.997084244897959	0.997079102040816	0.0320324897959184	0.98314506122449	0.13334	2	0.00167378038871567	0.00167997748687571	0.00839505607048402	0.0172091595875419	0.019070642667847
1137	9 vs. 24	3	0.9871	0.9762	0.0541	1	0.3889	3	0.978327836734694	0.963547755102041	0.0622181224489796	0.938534775510204	0.40110987755102	3	0.0162470837193968	0.0272804614226038	0.0217686779856555	0.0527818480087459	0.0383368411702942
1138	9 vs. 25	1	0.9989	0.9989	0.0265	1	0	1	0.998942612244898	0.998988244897959	0.0261798367346939	0.973154367346939	0.0477981224489796	1	0.000443190711999786	0.000438776826387494	0.00526656986503144	0.0241848423728632	0.0280526463759508
1139	9 vs. 25	2	0.9976	0.9976	0.0296	0.9677	0.1389	2	0.997084244897959	0.997079102040816	0.0320324897959184	0.98314506122449	0.13334	2	0.00167378038871567	0.00167997748687571	0.00839505607048402	0.0172091595875419	0.019070642667847
1140	9 vs. 25	3	0.9872	0.9761	0.0524	1	0.3889	3	0.978327836734694	0.963547755102041	0.0622181224489796	0.938534775510204	0.40110987755102	3	0.0162470837193968	0.0272804614226038	0.0217686779856555	0.0527818480087459	0.0383368411702942
1141	9 vs. 26	1	0.9989	0.9989	0.0266	1	0	1	0.998942612244898	0.998988244897959	0.0261798367346939	0.973154367346939	0.0477981224489796	1	0.000443190711999786	0.000438776826387494	0.00526656986503144	0.0241848423728632	0.0280526463759508
1142	9 vs. 26	2	0.9987	0.9986	0.0222	0.9677	0.1389	2	0.997084244897959	0.997079102040816	0.0320324897959184	0.98314506122449	0.13334	2	0.00167378038871567	0.00167997748687571	0.00839505607048402	0.0172091595875419	0.019070642667847
1143	9 vs. 26	3	0.9901	0.9816	0.0457	1	0.3889	3	0.978327836734694	0.963547755102041	0.0622181224489796	0.938534775510204	0.40110987755102	3	0.0162470837193968	0.0272804614226038	0.0217686779856555	0.0527818480087459	0.0383368411702942
1144	9 vs. 27	1	0.9989	0.9988	0.0268	0.9412	0.0556	1	0.998942612244898	0.998988244897959	0.0261798367346939	0.973154367346939	0.0477981224489796	1	0.000443190711999786	0.000438776826387494	0.00526656986503144	0.0241848423728632	0.0280526463759508
1145	9 vs. 27	2	0.9985	0.9986	0.0232	1	0.1111	2	0.997084244897959	0.997079102040816	0.0320324897959184	0.98314506122449	0.13334	2	0.00167378038871567	0.00167997748687571	0.00839505607048402	0.0172091595875419	0.019070642667847
1146	9 vs. 27	3	0.9627	0.9425	0.0872	0.8	0.4444	3	0.978327836734694	0.963547755102041	0.0622181224489796	0.938534775510204	0.40110987755102	3	0.0162470837193968	0.0272804614226038	0.0217686779856555	0.0527818480087459	0.0383368411702942
1147	9 vs. 28	1	0.9984	0.9985	0.0318	1	0	1	0.998942612244898	0.998988244897959	0.0261798367346939	0.973154367346939	0.0477981224489796	1	0.000443190711999786	0.000438776826387494	0.00526656986503144	0.0241848423728632	0.0280526463759508
1148	9 vs. 28	2	0.9976	0.9977	0.0296	1	0.1111	2	0.997084244897959	0.997079102040816	0.0320324897959184	0.98314506122449	0.13334	2	0.00167378038871567	0.00167997748687571	0.00839505607048402	0.0172091595875419	0.019070642667847
1149	9 vs. 28	3	0.9909	0.983	0.0447	0.9524	0.4167	3	0.978327836734694	0.963547755102041	0.0622181224489796	0.938534775510204	0.40110987755102	3	0.0162470837193968	0.0272804614226038	0.0217686779856555	0.0527818480087459	0.0383368411702942
1150	9 vs. 29	1	0.999	0.9991	0.0251	0.9714	0.0278	1	0.998942612244898	0.998988244897959	0.0261798367346939	0.973154367346939	0.0477981224489796	1	0.000443190711999786	0.000438776826387494	0.00526656986503144	0.0241848423728632	0.0280526463759508
1151	9 vs. 29	2	0.9982	0.9982	0.0252	1	0.1111	2	0.997084244897959	0.997079102040816	0.0320324897959184	0.98314506122449	0.13334	2	0.00167378038871567	0.00167997748687571	0.00839505607048402	0.0172091595875419	0.019070642667847
1152	9 vs. 29	3	0.9841	0.9757	0.0579	1	0.3889	3	0.978327836734694	0.963547755102041	0.0622181224489796	0.938534775510204	0.40110987755102	3	0.0162470837193968	0.0272804614226038	0.0217686779856555	0.0527818480087459	0.0383368411702942
1153	9 vs. 30	1	0.9982	0.9982	0.0341	1	0	1	0.998942612244898	0.998988244897959	0.0261798367346939	0.973154367346939	0.0477981224489796	1	0.000443190711999786	0.000438776826387494	0.00526656986503144	0.0241848423728632	0.0280526463759508
1154	9 vs. 30	2	0.9978	0.9978	0.0287	0.9677	0.1389	2	0.997084244897959	0.997079102040816	0.0320324897959184	0.98314506122449	0.13334	2	0.00167378038871567	0.00167997748687571	0.00839505607048402	0.0172091595875419	0.019070642667847
1155	9 vs. 30	3	0.9719	0.9471	0.0758	0.9	0.4444	3	0.978327836734694	0.963547755102041	0.0622181224489796	0.938534775510204	0.40110987755102	3	0.0162470837193968	0.0272804614226038	0.0217686779856555	0.0527818480087459	0.0383368411702942
1156	9 vs. 31	1	0.9973	0.9974	0.0424	0.9714	0.0278	1	0.998942612244898	0.998988244897959	0.0261798367346939	0.973154367346939	0.0477981224489796	1	0.000443190711999786	0.000438776826387494	0.00526656986503144	0.0241848423728632	0.0280526463759508
1157	9 vs. 31	2	0.9977	0.9977	0.0301	1	0.1111	2	0.997084244897959	0.997079102040816	0.0320324897959184	0.98314506122449	0.13334	2	0.00167378038871567	0.00167997748687571	0.00839505607048402	0.0172091595875419	0.019070642667847
1158	9 vs. 31	3	0.9789	0.9619	0.066	0.9524	0.4167	3	0.978327836734694	0.963547755102041	0.0622181224489796	0.938534775510204	0.40110987755102	3	0.0162470837193968	0.0272804614226038	0.0217686779856555	0.0527818480087459	0.0383368411702942
1159	9 vs. 32	1	0.9985	0.9985	0.0306	0.9714	0.0278	1	0.998942612244898	0.998988244897959	0.0261798367346939	0.973154367346939	0.0477981224489796	1	0.000443190711999786	0.000438776826387494	0.00526656986503144	0.0241848423728632	0.0280526463759508
1160	9 vs. 32	2	0.9977	0.9976	0.031	1	0.1111	2	0.997084244897959	0.997079102040816	0.0320324897959184	0.98314506122449	0.13334	2	0.00167378038871567	0.00167997748687571	0.00839505607048402	0.0172091595875419	0.019070642667847
1161	9 vs. 32	3	0.9905	0.9844	0.0446	0.9565	0.3611	3	0.978327836734694	0.963547755102041	0.0622181224489796	0.938534775510204	0.40110987755102	3	0.0162470837193968	0.0272804614226038	0.0217686779856555	0.0527818480087459	0.0383368411702942
1162	9 vs. 33	1	0.9977	0.9977	0.0383	0.9091	0.0833	1	0.998942612244898	0.998988244897959	0.0261798367346939	0.973154367346939	0.0477981224489796	1	0.000443190711999786	0.000438776826387494	0.00526656986503144	0.0241848423728632	0.0280526463759508
1163	9 vs. 33	2	0.9955	0.9953	0.0399	0.9677	0.1389	2	0.997084244897959	0.997079102040816	0.0320324897959184	0.98314506122449	0.13334	2	0.00167378038871567	0.00167997748687571	0.00839505607048402	0.0172091595875419	0.019070642667847
1164	9 vs. 33	3	0.9882	0.9783	0.0499	0.9	0.4444	3	0.978327836734694	0.963547755102041	0.0622181224489796	0.938534775510204	0.40110987755102	3	0.0162470837193968	0.0272804614226038	0.0217686779856555	0.0527818480087459	0.0383368411702942
1165	9 vs. 34	1	0.9994	0.9994	0.019	0.9714	0.0278	1	0.998942612244898	0.998988244897959	0.0261798367346939	0.973154367346939	0.0477981224489796	1	0.000443190711999786	0.000438776826387494	0.00526656986503144	0.0241848423728632	0.0280526463759508
1166	9 vs. 34	2	0.9979	0.9978	0.0275	1	0.1111	2	0.997084244897959	0.997079102040816	0.0320324897959184	0.98314506122449	0.13334	2	0.00167378038871567	0.00167997748687571	0.00839505607048402	0.0172091595875419	0.019070642667847
1167	9 vs. 34	3	0.9918	0.9851	0.0418	1	0.3889	3	0.978327836734694	0.963547755102041	0.0622181224489796	0.938534775510204	0.40110987755102	3	0.0162470837193968	0.0272804614226038	0.0217686779856555	0.0527818480087459	0.0383368411702942
1168	9 vs. 35	1	0.999	0.9991	0.025	0.9714	0.0278	1	0.998942612244898	0.998988244897959	0.0261798367346939	0.973154367346939	0.0477981224489796	1	0.000443190711999786	0.000438776826387494	0.00526656986503144	0.0241848423728632	0.0280526463759508
1169	9 vs. 35	2	0.998	0.998	0.0276	0.9677	0.1389	2	0.997084244897959	0.997079102040816	0.0320324897959184	0.98314506122449	0.13334	2	0.00167378038871567	0.00167997748687571	0.00839505607048402	0.0172091595875419	0.019070642667847
1170	9 vs. 35	3	0.9933	0.9886	0.0384	1	0.3889	3	0.978327836734694	0.963547755102041	0.0622181224489796	0.938534775510204	0.40110987755102	3	0.0162470837193968	0.0272804614226038	0.0217686779856555	0.0527818480087459	0.0383368411702942
1171	9 vs. 36	1	0.9988	0.9988	0.0279	0.9714	0.0278	1	0.998942612244898	0.998988244897959	0.0261798367346939	0.973154367346939	0.0477981224489796	1	0.000443190711999786	0.000438776826387494	0.00526656986503144	0.0241848423728632	0.0280526463759508
1172	9 vs. 36	2	0.9973	0.9971	0.0322	1	0.1111	2	0.997084244897959	0.997079102040816	0.0320324897959184	0.98314506122449	0.13334	2	0.00167378038871567	0.00167997748687571	0.00839505607048402	0.0172091595875419	0.019070642667847
1173	9 vs. 36	3	0.9913	0.9852	0.0458	0.9565	0.3611	3	0.978327836734694	0.963547755102041	0.0622181224489796	0.938534775510204	0.40110987755102	3	0.0162470837193968	0.0272804614226038	0.0217686779856555	0.0527818480087459	0.0383368411702942
1174	9 vs. 37	1	0.9988	0.9988	0.0286	0.9412	0.0556	1	0.998942612244898	0.998988244897959	0.0261798367346939	0.973154367346939	0.0477981224489796	1	0.000443190711999786	0.000438776826387494	0.00526656986503144	0.0241848423728632	0.0280526463759508
1175	9 vs. 37	2	0.9981	0.998	0.0264	0.9677	0.1389	2	0.997084244897959	0.997079102040816	0.0320324897959184	0.98314506122449	0.13334	2	0.00167378038871567	0.00167997748687571	0.00839505607048402	0.0172091595875419	0.019070642667847
1176	9 vs. 37	3	0.9822	0.9666	0.0606	0.9524	0.4167	3	0.978327836734694	0.963547755102041	0.0622181224489796	0.938534775510204	0.40110987755102	3	0.0162470837193968	0.0272804614226038	0.0217686779856555	0.0527818480087459	0.0383368411702942
1177	9 vs. 38	1	0.9985	0.9985	0.0367	0.9714	0.0278	1	0.998942612244898	0.998988244897959	0.0261798367346939	0.973154367346939	0.0477981224489796	1	0.000443190711999786	0.000438776826387494	0.00526656986503144	0.0241848423728632	0.0280526463759508
1178	9 vs. 38	2	0.9976	0.9975	0.0297	1	0.1111	2	0.997084244897959	0.997079102040816	0.0320324897959184	0.98314506122449	0.13334	2	0.00167378038871567	0.00167997748687571	0.00839505607048402	0.0172091595875419	0.019070642667847
1179	9 vs. 38	3	0.9799	0.9629	0.0645	0.9	0.4444	3	0.978327836734694	0.963547755102041	0.0622181224489796	0.938534775510204	0.40110987755102	3	0.0162470837193968	0.0272804614226038	0.0217686779856555	0.0527818480087459	0.0383368411702942
1180	9 vs. 39	1	0.9988	0.9989	0.0272	0.9714	0.0278	1	0.998942612244898	0.998988244897959	0.0261798367346939	0.973154367346939	0.0477981224489796	1	0.000443190711999786	0.000438776826387494	0.00526656986503144	0.0241848423728632	0.0280526463759508
1181	9 vs. 39	2	0.9977	0.9976	0.0289	0.9677	0.1389	2	0.997084244897959	0.997079102040816	0.0320324897959184	0.98314506122449	0.13334	2	0.00167378038871567	0.00167997748687571	0.00839505607048402	0.0172091595875419	0.019070642667847
1182	9 vs. 39	3	0.9946	0.9903	0.0342	1	0.3889	3	0.978327836734694	0.963547755102041	0.0622181224489796	0.938534775510204	0.40110987755102	3	0.0162470837193968	0.0272804614226038	0.0217686779856555	0.0527818480087459	0.0383368411702942
1183	9 vs. 40	1	0.9992	0.9992	0.0227	0.9714	0.0278	1	0.998942612244898	0.998988244897959	0.0261798367346939	0.973154367346939	0.0477981224489796	1	0.000443190711999786	0.000438776826387494	0.00526656986503144	0.0241848423728632	0.0280526463759508
1184	9 vs. 40	2	0.9985	0.9984	0.0236	1	0.1111	2	0.997084244897959	0.997079102040816	0.0320324897959184	0.98314506122449	0.13334	2	0.00167378038871567	0.00167997748687571	0.00839505607048402	0.0172091595875419	0.019070642667847
1185	9 vs. 40	3	0.986	0.9746	0.0538	0.9	0.4444	3	0.978327836734694	0.963547755102041	0.0622181224489796	0.938534775510204	0.40110987755102	3	0.0162470837193968	0.0272804614226038	0.0217686779856555	0.0527818480087459	0.0383368411702942
1186	9 vs. 41	1	0.9986	0.9986	0.0305	1	0	1	0.998942612244898	0.998988244897959	0.0261798367346939	0.973154367346939	0.0477981224489796	1	0.000443190711999786	0.000438776826387494	0.00526656986503144	0.0241848423728632	0.0280526463759508
1187	9 vs. 41	2	0.998	0.9979	0.0275	0.9677	0.1389	2	0.997084244897959	0.997079102040816	0.0320324897959184	0.98314506122449	0.13334	2	0.00167378038871567	0.00167997748687571	0.00839505607048402	0.0172091595875419	0.019070642667847
1188	9 vs. 41	3	0.9908	0.9832	0.0441	0.9565	0.3611	3	0.978327836734694	0.963547755102041	0.0622181224489796	0.938534775510204	0.40110987755102	3	0.0162470837193968	0.0272804614226038	0.0217686779856555	0.0527818480087459	0.0383368411702942
1189	9 vs. 42	1	0.9988	0.9988	0.0281	1	0	1	0.998942612244898	0.998988244897959	0.0261798367346939	0.973154367346939	0.0477981224489796	1	0.000443190711999786	0.000438776826387494	0.00526656986503144	0.0241848423728632	0.0280526463759508
1190	9 vs. 42	2	0.993	0.9926	0.0508	1	0.1111	2	0.997084244897959	0.997079102040816	0.0320324897959184	0.98314506122449	0.13334	2	0.00167378038871567	0.00167997748687571	0.00839505607048402	0.0172091595875419	0.019070642667847
1191	9 vs. 42	3	0.9837	0.9718	0.0581	0.9524	0.4167	3	0.978327836734694	0.963547755102041	0.0622181224489796	0.938534775510204	0.40110987755102	3	0.0162470837193968	0.0272804614226038	0.0217686779856555	0.0527818480087459	0.0383368411702942
1192	9 vs. 43	1	0.9992	0.9993	0.0218	0.9714	0.0278	1	0.998942612244898	0.998988244897959	0.0261798367346939	0.973154367346939	0.0477981224489796	1	0.000443190711999786	0.000438776826387494	0.00526656986503144	0.0241848423728632	0.0280526463759508
1193	9 vs. 43	2	0.9988	0.9988	0.0208	1	0.1111	2	0.997084244897959	0.997079102040816	0.0320324897959184	0.98314506122449	0.13334	2	0.00167378038871567	0.00167997748687571	0.00839505607048402	0.0172091595875419	0.019070642667847
1194	9 vs. 43	3	0.9843	0.9714	0.0572	0.9	0.4444	3	0.978327836734694	0.963547755102041	0.0622181224489796	0.938534775510204	0.40110987755102	3	0.0162470837193968	0.0272804614226038	0.0217686779856555	0.0527818480087459	0.0383368411702942
1195	9 vs. 44	1	0.9986	0.9987	0.0317	0.9714	0.0278	1	0.998942612244898	0.998988244897959	0.0261798367346939	0.973154367346939	0.0477981224489796	1	0.000443190711999786	0.000438776826387494	0.00526656986503144	0.0241848423728632	0.0280526463759508
1196	9 vs. 44	2	0.9979	0.9978	0.0277	1	0.1111	2	0.997084244897959	0.997079102040816	0.0320324897959184	0.98314506122449	0.13334	2	0.00167378038871567	0.00167997748687571	0.00839505607048402	0.0172091595875419	0.019070642667847
1197	9 vs. 44	3	0.9831	0.9711	0.059	1	0.3889	3	0.978327836734694	0.963547755102041	0.0622181224489796	0.938534775510204	0.40110987755102	3	0.0162470837193968	0.0272804614226038	0.0217686779856555	0.0527818480087459	0.0383368411702942
1198	9 vs. 45	1	0.999	0.9991	0.025	0.9714	0.0278	1	0.998942612244898	0.998988244897959	0.0261798367346939	0.973154367346939	0.0477981224489796	1	0.000443190711999786	0.000438776826387494	0.00526656986503144	0.0241848423728632	0.0280526463759508
1199	9 vs. 45	2	0.9985	0.9984	0.0245	1	0.1111	2	0.997084244897959	0.997079102040816	0.0320324897959184	0.98314506122449	0.13334	2	0.00167378038871567	0.00167997748687571	0.00839505607048402	0.0172091595875419	0.019070642667847
1200	9 vs. 45	3	0.9923	0.9858	0.0402	1	0.3889	3	0.978327836734694	0.963547755102041	0.0622181224489796	0.938534775510204	0.40110987755102	3	0.0162470837193968	0.0272804614226038	0.0217686779856555	0.0527818480087459	0.0383368411702942
1201	9 vs. 46	1	0.999	0.999	0.0255	0.9412	0.0556	1	0.998942612244898	0.998988244897959	0.0261798367346939	0.973154367346939	0.0477981224489796	1	0.000443190711999786	0.000438776826387494	0.00526656986503144	0.0241848423728632	0.0280526463759508
1202	9 vs. 46	2	0.9984	0.9985	0.0238	0.9677	0.1389	2	0.997084244897959	0.997079102040816	0.0320324897959184	0.98314506122449	0.13334	2	0.00167378038871567	0.00167997748687571	0.00839505607048402	0.0172091595875419	0.019070642667847
1203	9 vs. 46	3	0.9897	0.9809	0.0465	0.9524	0.4167	3	0.978327836734694	0.963547755102041	0.0622181224489796	0.938534775510204	0.40110987755102	3	0.0162470837193968	0.0272804614226038	0.0217686779856555	0.0527818480087459	0.0383368411702942
1204	9 vs. 47	1	0.9994	0.9994	0.0208	0.9714	0.0278	1	0.998942612244898	0.998988244897959	0.0261798367346939	0.973154367346939	0.0477981224489796	1	0.000443190711999786	0.000438776826387494	0.00526656986503144	0.0241848423728632	0.0280526463759508
1205	9 vs. 47	2	0.9994	0.9993	0.0152	0.9677	0.1389	2	0.997084244897959	0.997079102040816	0.0320324897959184	0.98314506122449	0.13334	2	0.00167378038871567	0.00167997748687571	0.00839505607048402	0.0172091595875419	0.019070642667847
1206	9 vs. 47	3	0.9932	0.9876	0.0378	1	0.3889	3	0.978327836734694	0.963547755102041	0.0622181224489796	0.938534775510204	0.40110987755102	3	0.0162470837193968	0.0272804614226038	0.0217686779856555	0.0527818480087459	0.0383368411702942
1207	9 vs. 48	1	0.9984	0.9984	0.0319	0.9714	0.0278	1	0.998942612244898	0.998988244897959	0.0261798367346939	0.973154367346939	0.0477981224489796	1	0.000443190711999786	0.000438776826387494	0.00526656986503144	0.0241848423728632	0.0280526463759508
1208	9 vs. 48	2	0.9982	0.9981	0.0279	1	0.1111	2	0.997084244897959	0.997079102040816	0.0320324897959184	0.98314506122449	0.13334	2	0.00167378038871567	0.00167997748687571	0.00839505607048402	0.0172091595875419	0.019070642667847
1209	9 vs. 48	3	0.9946	0.991	0.035	1	0.3889	3	0.978327836734694	0.963547755102041	0.0622181224489796	0.938534775510204	0.40110987755102	3	0.0162470837193968	0.0272804614226038	0.0217686779856555	0.0527818480087459	0.0383368411702942
1210	9 vs. 49	1	0.9993	0.9993	0.0213	1	0	1	0.998942612244898	0.998988244897959	0.0261798367346939	0.973154367346939	0.0477981224489796	1	0.000443190711999786	0.000438776826387494	0.00526656986503144	0.0241848423728632	0.0280526463759508
1211	9 vs. 49	2	0.998	0.9979	0.0285	0.9677	0.1389	2	0.997084244897959	0.997079102040816	0.0320324897959184	0.98314506122449	0.13334	2	0.00167378038871567	0.00167997748687571	0.00839505607048402	0.0172091595875419	0.019070642667847
1212	9 vs. 49	3	0.9862	0.9754	0.0537	1	0.3889	3	0.978327836734694	0.963547755102041	0.0622181224489796	0.938534775510204	0.40110987755102	3	0.0162470837193968	0.0272804614226038	0.0217686779856555	0.0527818480087459	0.0383368411702942
1213	9 vs. 50	1	0.9991	0.9992	0.0236	0.9091	0.0833	1	0.998942612244898	0.998988244897959	0.0261798367346939	0.973154367346939	0.0477981224489796	1	0.000443190711999786	0.000438776826387494	0.00526656986503144	0.0241848423728632	0.0280526463759508
1214	9 vs. 50	2	0.996	0.9959	0.0379	1	0.1111	2	0.997084244897959	0.997079102040816	0.0320324897959184	0.98314506122449	0.13334	2	0.00167378038871567	0.00167997748687571	0.00839505607048402	0.0172091595875419	0.019070642667847
1215	9 vs. 50	3	0.9857	0.9733	0.0545	0.9524	0.4167	3	0.978327836734694	0.963547755102041	0.0622181224489796	0.938534775510204	0.40110987755102	3	0.0162470837193968	0.0272804614226038	0.0217686779856555	0.0527818480087459	0.0383368411702942
1216	10 vs. 11	1	0.999	0.999	0.025	0.9697	0.0833	1	0.998942612244898	0.998988244897959	0.0261798367346939	0.973154367346939	0.0477981224489796	1	0.000443190711999786	0.000438776826387494	0.00526656986503144	0.0241848423728632	0.0280526463759508
1217	10 vs. 11	2	0.9973	0.9972	0.0328	1	0.1667	2	0.997084244897959	0.997079102040816	0.0320324897959184	0.98314506122449	0.13334	2	0.00167378038871567	0.00167997748687571	0.00839505607048402	0.0172091595875419	0.019070642667847
1218	10 vs. 11	3	0.9235	0.8755	0.1233	0.9091	0.3889	3	0.978327836734694	0.963547755102041	0.0622181224489796	0.938534775510204	0.40110987755102	3	0.0162470837193968	0.0272804614226038	0.0217686779856555	0.0527818480087459	0.0383368411702942
1219	10 vs. 12	1	0.9993	0.9994	0.0208	0.9412	0.0556	1	0.998942612244898	0.998988244897959	0.0261798367346939	0.973154367346939	0.0477981224489796	1	0.000443190711999786	0.000438776826387494	0.00526656986503144	0.0241848423728632	0.0280526463759508
1220	10 vs. 12	2	0.9983	0.9982	0.0267	1	0.1667	2	0.997084244897959	0.997079102040816	0.0320324897959184	0.98314506122449	0.13334	2	0.00167378038871567	0.00167997748687571	0.00839505607048402	0.0172091595875419	0.019070642667847
1221	10 vs. 12	3	0.9763	0.9552	0.0694	0.9474	0.4722	3	0.978327836734694	0.963547755102041	0.0622181224489796	0.938534775510204	0.40110987755102	3	0.0162470837193968	0.0272804614226038	0.0217686779856555	0.0527818480087459	0.0383368411702942
1222	10 vs. 13	1	0.9987	0.9987	0.0286	0.9091	0.0833	1	0.998942612244898	0.998988244897959	0.0261798367346939	0.973154367346939	0.0477981224489796	1	0.000443190711999786	0.000438776826387494	0.00526656986503144	0.0241848423728632	0.0280526463759508
1223	10 vs. 13	2	0.998	0.9979	0.0271	0.9677	0.1389	2	0.997084244897959	0.997079102040816	0.0320324897959184	0.98314506122449	0.13334	2	0.00167378038871567	0.00167997748687571	0.00839505607048402	0.0172091595875419	0.019070642667847
1224	10 vs. 13	3	0.9771	0.9616	0.0684	1	0.4444	3	0.978327836734694	0.963547755102041	0.0622181224489796	0.938534775510204	0.40110987755102	3	0.0162470837193968	0.0272804614226038	0.0217686779856555	0.0527818480087459	0.0383368411702942
1225	10 vs. 14	1	0.9991	0.9991	0.0236	0.9412	0.0556	1	0.998942612244898	0.998988244897959	0.0261798367346939	0.973154367346939	0.0477981224489796	1	0.000443190711999786	0.000438776826387494	0.00526656986503144	0.0241848423728632	0.0280526463759508
1226	10 vs. 14	2	0.9983	0.9982	0.0255	0.9677	0.1389	2	0.997084244897959	0.997079102040816	0.0320324897959184	0.98314506122449	0.13334	2	0.00167378038871567	0.00167997748687571	0.00839505607048402	0.0172091595875419	0.019070642667847
1227	10 vs. 14	3	0.9753	0.957	0.0707	0.9091	0.3889	3	0.978327836734694	0.963547755102041	0.0622181224489796	0.938534775510204	0.40110987755102	3	0.0162470837193968	0.0272804614226038	0.0217686779856555	0.0527818480087459	0.0383368411702942
1228	10 vs. 15	1	0.9992	0.9992	0.0233	0.9697	0.0833	1	0.998942612244898	0.998988244897959	0.0261798367346939	0.973154367346939	0.0477981224489796	1	0.000443190711999786	0.000438776826387494	0.00526656986503144	0.0241848423728632	0.0280526463759508
1229	10 vs. 15	2	0.9977	0.9979	0.029	1	0.1667	2	0.997084244897959	0.997079102040816	0.0320324897959184	0.98314506122449	0.13334	2	0.00167378038871567	0.00167997748687571	0.00839505607048402	0.0172091595875419	0.019070642667847
1230	10 vs. 15	3	0.9782	0.9582	0.0665	0.9524	0.4167	3	0.978327836734694	0.963547755102041	0.0622181224489796	0.938534775510204	0.40110987755102	3	0.0162470837193968	0.0272804614226038	0.0217686779856555	0.0527818480087459	0.0383368411702942
1231	10 vs. 16	1	0.9991	0.9991	0.0238	0.9697	0.0833	1	0.998942612244898	0.998988244897959	0.0261798367346939	0.973154367346939	0.0477981224489796	1	0.000443190711999786	0.000438776826387494	0.00526656986503144	0.0241848423728632	0.0280526463759508
1232	10 vs. 16	2	0.9991	0.9991	0.0186	0.9677	0.1389	2	0.997084244897959	0.997079102040816	0.0320324897959184	0.98314506122449	0.13334	2	0.00167378038871567	0.00167997748687571	0.00839505607048402	0.0172091595875419	0.019070642667847
1233	10 vs. 16	3	0.9618	0.9394	0.0878	0.9091	0.3889	3	0.978327836734694	0.963547755102041	0.0622181224489796	0.938534775510204	0.40110987755102	3	0.0162470837193968	0.0272804614226038	0.0217686779856555	0.0527818480087459	0.0383368411702942
1234	10 vs. 17	1	0.9993	0.9993	0.0218	0.9697	0.0833	1	0.998942612244898	0.998988244897959	0.0261798367346939	0.973154367346939	0.0477981224489796	1	0.000443190711999786	0.000438776826387494	0.00526656986503144	0.0241848423728632	0.0280526463759508
1235	10 vs. 17	2	0.9952	0.9951	0.0419	0.9677	0.1389	2	0.997084244897959	0.997079102040816	0.0320324897959184	0.98314506122449	0.13334	2	0.00167378038871567	0.00167997748687571	0.00839505607048402	0.0172091595875419	0.019070642667847
1236	10 vs. 17	3	0.98	0.9618	0.0635	0.9524	0.4167	3	0.978327836734694	0.963547755102041	0.0622181224489796	0.938534775510204	0.40110987755102	3	0.0162470837193968	0.0272804614226038	0.0217686779856555	0.0527818480087459	0.0383368411702942
1237	10 vs. 18	1	0.9987	0.9989	0.0295	0.9697	0.0833	1	0.998942612244898	0.998988244897959	0.0261798367346939	0.973154367346939	0.0477981224489796	1	0.000443190711999786	0.000438776826387494	0.00526656986503144	0.0241848423728632	0.0280526463759508
1238	10 vs. 18	2	0.9947	0.9951	0.0447	1	0.1667	2	0.997084244897959	0.997079102040816	0.0320324897959184	0.98314506122449	0.13334	2	0.00167378038871567	0.00167997748687571	0.00839505607048402	0.0172091595875419	0.019070642667847
1239	10 vs. 18	3	0.9825	0.9666	0.06	0.9524	0.4167	3	0.978327836734694	0.963547755102041	0.0622181224489796	0.938534775510204	0.40110987755102	3	0.0162470837193968	0.0272804614226038	0.0217686779856555	0.0527818480087459	0.0383368411702942
1240	10 vs. 19	1	0.9982	0.9983	0.0341	0.9697	0.0833	1	0.998942612244898	0.998988244897959	0.0261798367346939	0.973154367346939	0.0477981224489796	1	0.000443190711999786	0.000438776826387494	0.00526656986503144	0.0241848423728632	0.0280526463759508
1241	10 vs. 19	2	0.9963	0.9963	0.0371	0.9677	0.1389	2	0.997084244897959	0.997079102040816	0.0320324897959184	0.98314506122449	0.13334	2	0.00167378038871567	0.00167997748687571	0.00839505607048402	0.0172091595875419	0.019070642667847
1242	10 vs. 19	3	0.9419	0.9193	0.1103	0.8696	0.3611	3	0.978327836734694	0.963547755102041	0.0622181224489796	0.938534775510204	0.40110987755102	3	0.0162470837193968	0.0272804614226038	0.0217686779856555	0.0527818480087459	0.0383368411702942
1243	10 vs. 20	1	0.9984	0.9986	0.0322	0.9412	0.0556	1	0.998942612244898	0.998988244897959	0.0261798367346939	0.973154367346939	0.0477981224489796	1	0.000443190711999786	0.000438776826387494	0.00526656986503144	0.0241848423728632	0.0280526463759508
1244	10 vs. 20	2	0.9974	0.9973	0.0329	0.9677	0.1389	2	0.997084244897959	0.997079102040816	0.0320324897959184	0.98314506122449	0.13334	2	0.00167378038871567	0.00167997748687571	0.00839505607048402	0.0172091595875419	0.019070642667847
1245	10 vs. 20	3	0.9808	0.9634	0.0623	0.9091	0.3889	3	0.978327836734694	0.963547755102041	0.0622181224489796	0.938534775510204	0.40110987755102	3	0.0162470837193968	0.0272804614226038	0.0217686779856555	0.0527818480087459	0.0383368411702942
1246	10 vs. 21	1	0.9994	0.9994	0.0201	0.9412	0.0556	1	0.998942612244898	0.998988244897959	0.0261798367346939	0.973154367346939	0.0477981224489796	1	0.000443190711999786	0.000438776826387494	0.00526656986503144	0.0241848423728632	0.0280526463759508
1247	10 vs. 21	2	0.9986	0.9985	0.0276	0.9677	0.1389	2	0.997084244897959	0.997079102040816	0.0320324897959184	0.98314506122449	0.13334	2	0.00167378038871567	0.00167997748687571	0.00839505607048402	0.0172091595875419	0.019070642667847
1248	10 vs. 21	3	0.9904	0.9817	0.0447	0.9524	0.4167	3	0.978327836734694	0.963547755102041	0.0622181224489796	0.938534775510204	0.40110987755102	3	0.0162470837193968	0.0272804614226038	0.0217686779856555	0.0527818480087459	0.0383368411702942
1249	10 vs. 22	1	0.9985	0.9985	0.0313	0.9697	0.0833	1	0.998942612244898	0.998988244897959	0.0261798367346939	0.973154367346939	0.0477981224489796	1	0.000443190711999786	0.000438776826387494	0.00526656986503144	0.0241848423728632	0.0280526463759508
1250	10 vs. 22	2	0.9996	0.9996	0.0116	0.9677	0.1389	2	0.997084244897959	0.997079102040816	0.0320324897959184	0.98314506122449	0.13334	2	0.00167378038871567	0.00167997748687571	0.00839505607048402	0.0172091595875419	0.019070642667847
1251	10 vs. 22	3	0.9762	0.9573	0.0694	0.9524	0.4167	3	0.978327836734694	0.963547755102041	0.0622181224489796	0.938534775510204	0.40110987755102	3	0.0162470837193968	0.0272804614226038	0.0217686779856555	0.0527818480087459	0.0383368411702942
1252	10 vs. 23	1	0.999	0.999	0.0253	0.9697	0.0833	1	0.998942612244898	0.998988244897959	0.0261798367346939	0.973154367346939	0.0477981224489796	1	0.000443190711999786	0.000438776826387494	0.00526656986503144	0.0241848423728632	0.0280526463759508
1253	10 vs. 23	2	0.9982	0.9981	0.0292	0.9677	0.1389	2	0.997084244897959	0.997079102040816	0.0320324897959184	0.98314506122449	0.13334	2	0.00167378038871567	0.00167997748687571	0.00839505607048402	0.0172091595875419	0.019070642667847
1254	10 vs. 23	3	0.9866	0.9752	0.052	0.9524	0.4167	3	0.978327836734694	0.963547755102041	0.0622181224489796	0.938534775510204	0.40110987755102	3	0.0162470837193968	0.0272804614226038	0.0217686779856555	0.0527818480087459	0.0383368411702942
1255	10 vs. 24	1	0.9993	0.9994	0.0204	0.9412	0.0556	1	0.998942612244898	0.998988244897959	0.0261798367346939	0.973154367346939	0.0477981224489796	1	0.000443190711999786	0.000438776826387494	0.00526656986503144	0.0241848423728632	0.0280526463759508
1256	10 vs. 24	2	0.9967	0.9965	0.0348	1	0.1667	2	0.997084244897959	0.997079102040816	0.0320324897959184	0.98314506122449	0.13334	2	0.00167378038871567	0.00167997748687571	0.00839505607048402	0.0172091595875419	0.019070642667847
1257	10 vs. 24	3	0.983	0.9684	0.06	0.9524	0.4167	3	0.978327836734694	0.963547755102041	0.0622181224489796	0.938534775510204	0.40110987755102	3	0.0162470837193968	0.0272804614226038	0.0217686779856555	0.0527818480087459	0.0383368411702942
1258	10 vs. 25	1	0.9992	0.9993	0.0243	0.9412	0.0556	1	0.998942612244898	0.998988244897959	0.0261798367346939	0.973154367346939	0.0477981224489796	1	0.000443190711999786	0.000438776826387494	0.00526656986503144	0.0241848423728632	0.0280526463759508
1259	10 vs. 25	2	0.9966	0.9964	0.0362	1	0.1667	2	0.997084244897959	0.997079102040816	0.0320324897959184	0.98314506122449	0.13334	2	0.00167378038871567	0.00167997748687571	0.00839505607048402	0.0172091595875419	0.019070642667847
1260	10 vs. 25	3	0.9816	0.9649	0.0627	0.9524	0.4167	3	0.978327836734694	0.963547755102041	0.0622181224489796	0.938534775510204	0.40110987755102	3	0.0162470837193968	0.0272804614226038	0.0217686779856555	0.0527818480087459	0.0383368411702942
1261	10 vs. 26	1	0.9991	0.9992	0.0252	0.9412	0.0556	1	0.998942612244898	0.998988244897959	0.0261798367346939	0.973154367346939	0.0477981224489796	1	0.000443190711999786	0.000438776826387494	0.00526656986503144	0.0241848423728632	0.0280526463759508
1262	10 vs. 26	2	0.9984	0.9983	0.0243	1	0.1667	2	0.997084244897959	0.997079102040816	0.0320324897959184	0.98314506122449	0.13334	2	0.00167378038871567	0.00167997748687571	0.00839505607048402	0.0172091595875419	0.019070642667847
1263	10 vs. 26	3	0.9918	0.9844	0.0418	0.9524	0.4167	3	0.978327836734694	0.963547755102041	0.0622181224489796	0.938534775510204	0.40110987755102	3	0.0162470837193968	0.0272804614226038	0.0217686779856555	0.0527818480087459	0.0383368411702942
1264	10 vs. 27	1	0.9994	0.9994	0.0207	1	0.1111	1	0.998942612244898	0.998988244897959	0.0261798367346939	0.973154367346939	0.0477981224489796	1	0.000443190711999786	0.000438776826387494	0.00526656986503144	0.0241848423728632	0.0280526463759508
1265	10 vs. 27	2	0.9987	0.9989	0.0221	0.9677	0.1389	2	0.997084244897959	0.997079102040816	0.0320324897959184	0.98314506122449	0.13334	2	0.00167378038871567	0.00167997748687571	0.00839505607048402	0.0172091595875419	0.019070642667847
1266	10 vs. 27	3	0.953	0.9267	0.0968	0.8421	0.4722	3	0.978327836734694	0.963547755102041	0.0622181224489796	0.938534775510204	0.40110987755102	3	0.0162470837193968	0.0272804614226038	0.0217686779856555	0.0527818480087459	0.0383368411702942
1267	10 vs. 28	1	0.9989	0.999	0.026	0.9412	0.0556	1	0.998942612244898	0.998988244897959	0.0261798367346939	0.973154367346939	0.0477981224489796	1	0.000443190711999786	0.000438776826387494	0.00526656986503144	0.0241848423728632	0.0280526463759508
1268	10 vs. 28	2	0.9973	0.9976	0.0317	0.9677	0.1389	2	0.997084244897959	0.997079102040816	0.0320324897959184	0.98314506122449	0.13334	2	0.00167378038871567	0.00167997748687571	0.00839505607048402	0.0172091595875419	0.019070642667847
1269	10 vs. 28	3	0.9811	0.9641	0.062	0.9	0.4444	3	0.978327836734694	0.963547755102041	0.0622181224489796	0.938534775510204	0.40110987755102	3	0.0162470837193968	0.0272804614226038	0.0217686779856555	0.0527818480087459	0.0383368411702942
1270	10 vs. 29	1	0.9993	0.9995	0.0221	0.9697	0.0833	1	0.998942612244898	0.998988244897959	0.0261798367346939	0.973154367346939	0.0477981224489796	1	0.000443190711999786	0.000438776826387494	0.00526656986503144	0.0241848423728632	0.0280526463759508
1271	10 vs. 29	2	0.9978	0.9978	0.0289	0.9677	0.1389	2	0.997084244897959	0.997079102040816	0.0320324897959184	0.98314506122449	0.13334	2	0.00167378038871567	0.00167997748687571	0.00839505607048402	0.0172091595875419	0.019070642667847
1272	10 vs. 29	3	0.9439	0.9053	0.1057	0.9524	0.4167	3	0.978327836734694	0.963547755102041	0.0622181224489796	0.938534775510204	0.40110987755102	3	0.0162470837193968	0.0272804614226038	0.0217686779856555	0.0527818480087459	0.0383368411702942
1273	10 vs. 30	1	0.999	0.999	0.025	0.9412	0.0556	1	0.998942612244898	0.998988244897959	0.0261798367346939	0.973154367346939	0.0477981224489796	1	0.000443190711999786	0.000438776826387494	0.00526656986503144	0.0241848423728632	0.0280526463759508
1274	10 vs. 30	2	0.9963	0.9962	0.0383	1	0.1667	2	0.997084244897959	0.997079102040816	0.0320324897959184	0.98314506122449	0.13334	2	0.00167378038871567	0.00167997748687571	0.00839505607048402	0.0172091595875419	0.019070642667847
1275	10 vs. 30	3	0.9845	0.9705	0.0562	0.9474	0.4722	3	0.978327836734694	0.963547755102041	0.0622181224489796	0.938534775510204	0.40110987755102	3	0.0162470837193968	0.0272804614226038	0.0217686779856555	0.0527818480087459	0.0383368411702942
1276	10 vs. 31	1	0.9983	0.9983	0.0336	0.9091	0.0833	1	0.998942612244898	0.998988244897959	0.0261798367346939	0.973154367346939	0.0477981224489796	1	0.000443190711999786	0.000438776826387494	0.00526656986503144	0.0241848423728632	0.0280526463759508
1277	10 vs. 31	2	0.9972	0.9971	0.0344	0.9677	0.1389	2	0.997084244897959	0.997079102040816	0.0320324897959184	0.98314506122449	0.13334	2	0.00167378038871567	0.00167997748687571	0.00839505607048402	0.0172091595875419	0.019070642667847
1278	10 vs. 31	3	0.9706	0.9468	0.0769	1	0.4444	3	0.978327836734694	0.963547755102041	0.0622181224489796	0.938534775510204	0.40110987755102	3	0.0162470837193968	0.0272804614226038	0.0217686779856555	0.0527818480087459	0.0383368411702942
1279	10 vs. 32	1	0.9992	0.9993	0.0226	0.9697	0.0833	1	0.998942612244898	0.998988244897959	0.0261798367346939	0.973154367346939	0.0477981224489796	1	0.000443190711999786	0.000438776826387494	0.00526656986503144	0.0241848423728632	0.0280526463759508
1280	10 vs. 32	2	0.9969	0.9967	0.0346	0.9677	0.1389	2	0.997084244897959	0.997079102040816	0.0320324897959184	0.98314506122449	0.13334	2	0.00167378038871567	0.00167997748687571	0.00839505607048402	0.0172091595875419	0.019070642667847
1281	10 vs. 32	3	0.9744	0.9559	0.0718	0.9091	0.3889	3	0.978327836734694	0.963547755102041	0.0622181224489796	0.938534775510204	0.40110987755102	3	0.0162470837193968	0.0272804614226038	0.0217686779856555	0.0527818480087459	0.0383368411702942
1282	10 vs. 33	1	0.9988	0.9988	0.0282	0.9677	0.1389	1	0.998942612244898	0.998988244897959	0.0261798367346939	0.973154367346939	0.0477981224489796	1	0.000443190711999786	0.000438776826387494	0.00526656986503144	0.0241848423728632	0.0280526463759508
1283	10 vs. 33	2	0.9953	0.9952	0.0415	0.9333	0.1667	2	0.997084244897959	0.997079102040816	0.0320324897959184	0.98314506122449	0.13334	2	0.00167378038871567	0.00167997748687571	0.00839505607048402	0.0172091595875419	0.019070642667847
1284	10 vs. 33	3	0.9883	0.9778	0.0489	0.9474	0.4722	3	0.978327836734694	0.963547755102041	0.0622181224489796	0.938534775510204	0.40110987755102	3	0.0162470837193968	0.0272804614226038	0.0217686779856555	0.0527818480087459	0.0383368411702942
1285	10 vs. 34	1	0.9995	0.9995	0.019	0.9697	0.0833	1	0.998942612244898	0.998988244897959	0.0261798367346939	0.973154367346939	0.0477981224489796	1	0.000443190711999786	0.000438776826387494	0.00526656986503144	0.0241848423728632	0.0280526463759508
1286	10 vs. 34	2	0.9981	0.9981	0.0268	0.9677	0.1389	2	0.997084244897959	0.997079102040816	0.0320324897959184	0.98314506122449	0.13334	2	0.00167378038871567	0.00167997748687571	0.00839505607048402	0.0172091595875419	0.019070642667847
1287	10 vs. 34	3	0.9783	0.9604	0.0662	0.9524	0.4167	3	0.978327836734694	0.963547755102041	0.0622181224489796	0.938534775510204	0.40110987755102	3	0.0162470837193968	0.0272804614226038	0.0217686779856555	0.0527818480087459	0.0383368411702942
1288	10 vs. 35	1	0.9992	0.9993	0.0239	0.9697	0.0833	1	0.998942612244898	0.998988244897959	0.0261798367346939	0.973154367346939	0.0477981224489796	1	0.000443190711999786	0.000438776826387494	0.00526656986503144	0.0241848423728632	0.0280526463759508
1289	10 vs. 35	2	0.9966	0.9965	0.0352	1	0.1667	2	0.997084244897959	0.997079102040816	0.0320324897959184	0.98314506122449	0.13334	2	0.00167378038871567	0.00167997748687571	0.00839505607048402	0.0172091595875419	0.019070642667847
1290	10 vs. 35	3	0.9762	0.9579	0.0693	0.9524	0.4167	3	0.978327836734694	0.963547755102041	0.0622181224489796	0.938534775510204	0.40110987755102	3	0.0162470837193968	0.0272804614226038	0.0217686779856555	0.0527818480087459	0.0383368411702942
1291	10 vs. 36	1	0.9991	0.9991	0.0246	0.9697	0.0833	1	0.998942612244898	0.998988244897959	0.0261798367346939	0.973154367346939	0.0477981224489796	1	0.000443190711999786	0.000438776826387494	0.00526656986503144	0.0241848423728632	0.0280526463759508
1292	10 vs. 36	2	0.9981	0.9981	0.0266	0.9677	0.1389	2	0.997084244897959	0.997079102040816	0.0320324897959184	0.98314506122449	0.13334	2	0.00167378038871567	0.00167997748687571	0.00839505607048402	0.0172091595875419	0.019070642667847
1293	10 vs. 36	3	0.9633	0.9345	0.086	0.9091	0.3889	3	0.978327836734694	0.963547755102041	0.0622181224489796	0.938534775510204	0.40110987755102	3	0.0162470837193968	0.0272804614226038	0.0217686779856555	0.0527818480087459	0.0383368411702942
1294	10 vs. 37	1	0.9994	0.9995	0.0189	1	0.1111	1	0.998942612244898	0.998988244897959	0.0261798367346939	0.973154367346939	0.0477981224489796	1	0.000443190711999786	0.000438776826387494	0.00526656986503144	0.0241848423728632	0.0280526463759508
1295	10 vs. 37	2	0.9973	0.9972	0.0318	1	0.1667	2	0.997084244897959	0.997079102040816	0.0320324897959184	0.98314506122449	0.13334	2	0.00167378038871567	0.00167997748687571	0.00839505607048402	0.0172091595875419	0.019070642667847
1296	10 vs. 37	3	0.9877	0.9766	0.05	1	0.4444	3	0.978327836734694	0.963547755102041	0.0622181224489796	0.938534775510204	0.40110987755102	3	0.0162470837193968	0.0272804614226038	0.0217686779856555	0.0527818480087459	0.0383368411702942
1297	10 vs. 38	1	0.9991	0.9991	0.0266	0.9697	0.0833	1	0.998942612244898	0.998988244897959	0.0261798367346939	0.973154367346939	0.0477981224489796	1	0.000443190711999786	0.000438776826387494	0.00526656986503144	0.0241848423728632	0.0280526463759508
1298	10 vs. 38	2	0.997	0.9969	0.0339	0.9677	0.1389	2	0.997084244897959	0.997079102040816	0.0320324897959184	0.98314506122449	0.13334	2	0.00167378038871567	0.00167997748687571	0.00839505607048402	0.0172091595875419	0.019070642667847
1299	10 vs. 38	3	0.987	0.9761	0.0515	0.9474	0.4722	3	0.978327836734694	0.963547755102041	0.0622181224489796	0.938534775510204	0.40110987755102	3	0.0162470837193968	0.0272804614226038	0.0217686779856555	0.0527818480087459	0.0383368411702942
1300	10 vs. 39	1	0.9994	0.9995	0.0215	0.9697	0.0833	1	0.998942612244898	0.998988244897959	0.0261798367346939	0.973154367346939	0.0477981224489796	1	0.000443190711999786	0.000438776826387494	0.00526656986503144	0.0241848423728632	0.0280526463759508
1301	10 vs. 39	2	0.9977	0.9977	0.0291	1	0.1667	2	0.997084244897959	0.997079102040816	0.0320324897959184	0.98314506122449	0.13334	2	0.00167378038871567	0.00167997748687571	0.00839505607048402	0.0172091595875419	0.019070642667847
1302	10 vs. 39	3	0.9847	0.9722	0.0556	0.9524	0.4167	3	0.978327836734694	0.963547755102041	0.0622181224489796	0.938534775510204	0.40110987755102	3	0.0162470837193968	0.0272804614226038	0.0217686779856555	0.0527818480087459	0.0383368411702942
1303	10 vs. 40	1	0.9991	0.9992	0.0238	0.9697	0.0833	1	0.998942612244898	0.998988244897959	0.0261798367346939	0.973154367346939	0.0477981224489796	1	0.000443190711999786	0.000438776826387494	0.00526656986503144	0.0241848423728632	0.0280526463759508
1304	10 vs. 40	2	0.998	0.998	0.0267	0.9677	0.1389	2	0.997084244897959	0.997079102040816	0.0320324897959184	0.98314506122449	0.13334	2	0.00167378038871567	0.00167997748687571	0.00839505607048402	0.0172091595875419	0.019070642667847
1305	10 vs. 40	3	0.9692	0.9438	0.0789	0.9474	0.4722	3	0.978327836734694	0.963547755102041	0.0622181224489796	0.938534775510204	0.40110987755102	3	0.0162470837193968	0.0272804614226038	0.0217686779856555	0.0527818480087459	0.0383368411702942
1306	10 vs. 41	1	0.9992	0.9992	0.0221	0.9412	0.0556	1	0.998942612244898	0.998988244897959	0.0261798367346939	0.973154367346939	0.0477981224489796	1	0.000443190711999786	0.000438776826387494	0.00526656986503144	0.0241848423728632	0.0280526463759508
1307	10 vs. 41	2	0.9971	0.997	0.0339	1	0.1667	2	0.997084244897959	0.997079102040816	0.0320324897959184	0.98314506122449	0.13334	2	0.00167378038871567	0.00167997748687571	0.00839505607048402	0.0172091595875419	0.019070642667847
1308	10 vs. 41	3	0.975	0.9539	0.071	0.9091	0.3889	3	0.978327836734694	0.963547755102041	0.0622181224489796	0.938534775510204	0.40110987755102	3	0.0162470837193968	0.0272804614226038	0.0217686779856555	0.0527818480087459	0.0383368411702942
1309	10 vs. 42	1	0.9989	0.9989	0.0303	0.9412	0.0556	1	0.998942612244898	0.998988244897959	0.0261798367346939	0.973154367346939	0.0477981224489796	1	0.000443190711999786	0.000438776826387494	0.00526656986503144	0.0241848423728632	0.0280526463759508
1310	10 vs. 42	2	0.9947	0.9944	0.0442	0.9677	0.1389	2	0.997084244897959	0.997079102040816	0.0320324897959184	0.98314506122449	0.13334	2	0.00167378038871567	0.00167997748687571	0.00839505607048402	0.0172091595875419	0.019070642667847
1311	10 vs. 42	3	0.9721	0.9512	0.075	1	0.4444	3	0.978327836734694	0.963547755102041	0.0622181224489796	0.938534775510204	0.40110987755102	3	0.0162470837193968	0.0272804614226038	0.0217686779856555	0.0527818480087459	0.0383368411702942
1312	10 vs. 43	1	0.9995	0.9995	0.0191	0.9697	0.0833	1	0.998942612244898	0.998988244897959	0.0261798367346939	0.973154367346939	0.0477981224489796	1	0.000443190711999786	0.000438776826387494	0.00526656986503144	0.0241848423728632	0.0280526463759508
1313	10 vs. 43	2	0.9978	0.9978	0.0284	0.9677	0.1389	2	0.997084244897959	0.997079102040816	0.0320324897959184	0.98314506122449	0.13334	2	0.00167378038871567	0.00167997748687571	0.00839505607048402	0.0172091595875419	0.019070642667847
1314	10 vs. 43	3	0.9901	0.9817	0.0453	0.9474	0.4722	3	0.978327836734694	0.963547755102041	0.0622181224489796	0.938534775510204	0.40110987755102	3	0.0162470837193968	0.0272804614226038	0.0217686779856555	0.0527818480087459	0.0383368411702942
1315	10 vs. 44	1	0.9988	0.9989	0.0282	0.9697	0.0833	1	0.998942612244898	0.998988244897959	0.0261798367346939	0.973154367346939	0.0477981224489796	1	0.000443190711999786	0.000438776826387494	0.00526656986503144	0.0241848423728632	0.0280526463759508
1316	10 vs. 44	2	0.9976	0.9975	0.0308	0.9677	0.1389	2	0.997084244897959	0.997079102040816	0.0320324897959184	0.98314506122449	0.13334	2	0.00167378038871567	0.00167997748687571	0.00839505607048402	0.0172091595875419	0.019070642667847
1317	10 vs. 44	3	0.9489	0.9096	0.1015	0.9524	0.4167	3	0.978327836734694	0.963547755102041	0.0622181224489796	0.938534775510204	0.40110987755102	3	0.0162470837193968	0.0272804614226038	0.0217686779856555	0.0527818480087459	0.0383368411702942
1318	10 vs. 45	1	0.9991	0.9992	0.0242	0.9697	0.0833	1	0.998942612244898	0.998988244897959	0.0261798367346939	0.973154367346939	0.0477981224489796	1	0.000443190711999786	0.000438776826387494	0.00526656986503144	0.0241848423728632	0.0280526463759508
1319	10 vs. 45	2	0.9977	0.9976	0.0293	0.9677	0.1389	2	0.997084244897959	0.997079102040816	0.0320324897959184	0.98314506122449	0.13334	2	0.00167378038871567	0.00167997748687571	0.00839505607048402	0.0172091595875419	0.019070642667847
1320	10 vs. 45	3	0.9851	0.9717	0.0549	0.9524	0.4167	3	0.978327836734694	0.963547755102041	0.0622181224489796	0.938534775510204	0.40110987755102	3	0.0162470837193968	0.0272804614226038	0.0217686779856555	0.0527818480087459	0.0383368411702942
1321	10 vs. 46	1	0.9995	0.9996	0.0178	1	0.1111	1	0.998942612244898	0.998988244897959	0.0261798367346939	0.973154367346939	0.0477981224489796	1	0.000443190711999786	0.000438776826387494	0.00526656986503144	0.0241848423728632	0.0280526463759508
1322	10 vs. 46	2	0.998	0.998	0.0273	1	0.1667	2	0.997084244897959	0.997079102040816	0.0320324897959184	0.98314506122449	0.13334	2	0.00167378038871567	0.00167997748687571	0.00839505607048402	0.0172091595875419	0.019070642667847
1323	10 vs. 46	3	0.9931	0.987	0.0378	1	0.4444	3	0.978327836734694	0.963547755102041	0.0622181224489796	0.938534775510204	0.40110987755102	3	0.0162470837193968	0.0272804614226038	0.0217686779856555	0.0527818480087459	0.0383368411702942
1324	10 vs. 47	1	0.9995	0.9995	0.0188	0.9697	0.0833	1	0.998942612244898	0.998988244897959	0.0261798367346939	0.973154367346939	0.0477981224489796	1	0.000443190711999786	0.000438776826387494	0.00526656986503144	0.0241848423728632	0.0280526463759508
1325	10 vs. 47	2	0.9984	0.9983	0.025	1	0.1667	2	0.997084244897959	0.997079102040816	0.0320324897959184	0.98314506122449	0.13334	2	0.00167378038871567	0.00167997748687571	0.00839505607048402	0.0172091595875419	0.019070642667847
1326	10 vs. 47	3	0.9779	0.9594	0.0668	0.9524	0.4167	3	0.978327836734694	0.963547755102041	0.0622181224489796	0.938534775510204	0.40110987755102	3	0.0162470837193968	0.0272804614226038	0.0217686779856555	0.0527818480087459	0.0383368411702942
1327	10 vs. 48	1	0.9992	0.9992	0.0232	0.9697	0.0833	1	0.998942612244898	0.998988244897959	0.0261798367346939	0.973154367346939	0.0477981224489796	1	0.000443190711999786	0.000438776826387494	0.00526656986503144	0.0241848423728632	0.0280526463759508
1328	10 vs. 48	2	0.9983	0.9983	0.0291	0.9677	0.1389	2	0.997084244897959	0.997079102040816	0.0320324897959184	0.98314506122449	0.13334	2	0.00167378038871567	0.00167997748687571	0.00839505607048402	0.0172091595875419	0.019070642667847
1329	10 vs. 48	3	0.9782	0.9614	0.0665	0.9524	0.4167	3	0.978327836734694	0.963547755102041	0.0622181224489796	0.938534775510204	0.40110987755102	3	0.0162470837193968	0.0272804614226038	0.0217686779856555	0.0527818480087459	0.0383368411702942
1330	10 vs. 49	1	0.9991	0.9991	0.0242	0.9412	0.0556	1	0.998942612244898	0.998988244897959	0.0261798367346939	0.973154367346939	0.0477981224489796	1	0.000443190711999786	0.000438776826387494	0.00526656986503144	0.0241848423728632	0.0280526463759508
1331	10 vs. 49	2	0.998	0.9979	0.0299	1	0.1667	2	0.997084244897959	0.997079102040816	0.0320324897959184	0.98314506122449	0.13334	2	0.00167378038871567	0.00167997748687571	0.00839505607048402	0.0172091595875419	0.019070642667847
1332	10 vs. 49	3	0.9757	0.9562	0.0712	0.9524	0.4167	3	0.978327836734694	0.963547755102041	0.0622181224489796	0.938534775510204	0.40110987755102	3	0.0162470837193968	0.0272804614226038	0.0217686779856555	0.0527818480087459	0.0383368411702942
1333	10 vs. 50	1	0.9995	0.9995	0.0196	0.9677	0.1389	1	0.998942612244898	0.998988244897959	0.0261798367346939	0.973154367346939	0.0477981224489796	1	0.000443190711999786	0.000438776826387494	0.00526656986503144	0.0241848423728632	0.0280526463759508
1334	10 vs. 50	2	0.9954	0.9952	0.0409	0.9677	0.1389	2	0.997084244897959	0.997079102040816	0.0320324897959184	0.98314506122449	0.13334	2	0.00167378038871567	0.00167997748687571	0.00839505607048402	0.0172091595875419	0.019070642667847
1335	10 vs. 50	3	0.9932	0.9871	0.0376	1	0.4444	3	0.978327836734694	0.963547755102041	0.0622181224489796	0.938534775510204	0.40110987755102	3	0.0162470837193968	0.0272804614226038	0.0217686779856555	0.0527818480087459	0.0383368411702942
1336	11 vs. 12	1	0.9987	0.9987	0.0292	0.9714	0.0278	1	0.998942612244898	0.998988244897959	0.0261798367346939	0.973154367346939	0.0477981224489796	1	0.000443190711999786	0.000438776826387494	0.00526656986503144	0.0241848423728632	0.0280526463759508
1337	11 vs. 12	2	0.9986	0.9986	0.022	1	0.1667	2	0.997084244897959	0.997079102040816	0.0320324897959184	0.98314506122449	0.13334	2	0.00167378038871567	0.00167997748687571	0.00839505607048402	0.0172091595875419	0.019070642667847
1338	11 vs. 12	3	0.8966	0.8286	0.1397	0.8571	0.4167	3	0.978327836734694	0.963547755102041	0.0622181224489796	0.938534775510204	0.40110987755102	3	0.0162470837193968	0.0272804614226038	0.0217686779856555	0.0527818480087459	0.0383368411702942
1339	11 vs. 13	1	0.9982	0.9982	0.0337	0.9412	0.0556	1	0.998942612244898	0.998988244897959	0.0261798367346939	0.973154367346939	0.0477981224489796	1	0.000443190711999786	0.000438776826387494	0.00526656986503144	0.0241848423728632	0.0280526463759508
1340	11 vs. 13	2	0.9982	0.9982	0.0282	0.9677	0.1389	2	0.997084244897959	0.997079102040816	0.0320324897959184	0.98314506122449	0.13334	2	0.00167378038871567	0.00167997748687571	0.00839505607048402	0.0172091595875419	0.019070642667847
1341	11 vs. 13	3	0.9481	0.9156	0.0989	0.9091	0.3889	3	0.978327836734694	0.963547755102041	0.0622181224489796	0.938534775510204	0.40110987755102	3	0.0162470837193968	0.0272804614226038	0.0217686779856555	0.0527818480087459	0.0383368411702942
1342	11 vs. 14	1	0.9986	0.9986	0.03	0.9714	0.0278	1	0.998942612244898	0.998988244897959	0.0261798367346939	0.973154367346939	0.0477981224489796	1	0.000443190711999786	0.000438776826387494	0.00526656986503144	0.0241848423728632	0.0280526463759508
1343	11 vs. 14	2	0.9977	0.9976	0.0294	0.9677	0.1389	2	0.997084244897959	0.997079102040816	0.0320324897959184	0.98314506122449	0.13334	2	0.00167378038871567	0.00167997748687571	0.00839505607048402	0.0172091595875419	0.019070642667847
1344	11 vs. 14	3	0.9726	0.9567	0.0734	0.9167	0.3333	3	0.978327836734694	0.963547755102041	0.0622181224489796	0.938534775510204	0.40110987755102	3	0.0162470837193968	0.0272804614226038	0.0217686779856555	0.0527818480087459	0.0383368411702942
1345	11 vs. 15	1	0.9992	0.9992	0.0237	0.9412	0.0556	1	0.998942612244898	0.998988244897959	0.0261798367346939	0.973154367346939	0.0477981224489796	1	0.000443190711999786	0.000438776826387494	0.00526656986503144	0.0241848423728632	0.0280526463759508
1346	11 vs. 15	2	0.9974	0.9974	0.0309	1	0.1667	2	0.997084244897959	0.997079102040816	0.0320324897959184	0.98314506122449	0.13334	2	0.00167378038871567	0.00167997748687571	0.00839505607048402	0.0172091595875419	0.019070642667847
1347	11 vs. 15	3	0.9588	0.9396	0.0901	0.9565	0.3611	3	0.978327836734694	0.963547755102041	0.0622181224489796	0.938534775510204	0.40110987755102	3	0.0162470837193968	0.0272804614226038	0.0217686779856555	0.0527818480087459	0.0383368411702942
1348	11 vs. 16	1	0.9992	0.9992	0.0228	1	0.0556	1	0.998942612244898	0.998988244897959	0.0261798367346939	0.973154367346939	0.0477981224489796	1	0.000443190711999786	0.000438776826387494	0.00526656986503144	0.0241848423728632	0.0280526463759508
1349	11 vs. 16	2	0.9965	0.9964	0.0371	0.9677	0.1389	2	0.997084244897959	0.997079102040816	0.0320324897959184	0.98314506122449	0.13334	2	0.00167378038871567	0.00167997748687571	0.00839505607048402	0.0172091595875419	0.019070642667847
1350	11 vs. 16	3	0.9715	0.9541	0.0747	0.9167	0.3333	3	0.978327836734694	0.963547755102041	0.0622181224489796	0.938534775510204	0.40110987755102	3	0.0162470837193968	0.0272804614226038	0.0217686779856555	0.0527818480087459	0.0383368411702942
1351	11 vs. 17	1	0.9989	0.9989	0.0267	1	0.0556	1	0.998942612244898	0.998988244897959	0.0261798367346939	0.973154367346939	0.0477981224489796	1	0.000443190711999786	0.000438776826387494	0.00526656986503144	0.0241848423728632	0.0280526463759508
1352	11 vs. 17	2	0.9959	0.9959	0.0384	0.9677	0.1389	2	0.997084244897959	0.997079102040816	0.0320324897959184	0.98314506122449	0.13334	2	0.00167378038871567	0.00167997748687571	0.00839505607048402	0.0172091595875419	0.019070642667847
1353	11 vs. 17	3	0.9637	0.9474	0.0838	0.9565	0.3611	3	0.978327836734694	0.963547755102041	0.0622181224489796	0.938534775510204	0.40110987755102	3	0.0162470837193968	0.0272804614226038	0.0217686779856555	0.0527818480087459	0.0383368411702942
1354	11 vs. 18	1	0.9992	0.9992	0.024	1	0.0556	1	0.998942612244898	0.998988244897959	0.0261798367346939	0.973154367346939	0.0477981224489796	1	0.000443190711999786	0.000438776826387494	0.00526656986503144	0.0241848423728632	0.0280526463759508
1355	11 vs. 18	2	0.9956	0.9963	0.0391	1	0.1667	2	0.997084244897959	0.997079102040816	0.0320324897959184	0.98314506122449	0.13334	2	0.00167378038871567	0.00167997748687571	0.00839505607048402	0.0172091595875419	0.019070642667847
1356	11 vs. 18	3	0.9459	0.9172	0.1045	0.9565	0.3611	3	0.978327836734694	0.963547755102041	0.0622181224489796	0.938534775510204	0.40110987755102	3	0.0162470837193968	0.0272804614226038	0.0217686779856555	0.0527818480087459	0.0383368411702942
1357	11 vs. 19	1	0.999	0.9991	0.0248	1	0.0556	1	0.998942612244898	0.998988244897959	0.0261798367346939	0.973154367346939	0.0477981224489796	1	0.000443190711999786	0.000438776826387494	0.00526656986503144	0.0241848423728632	0.0280526463759508
1358	11 vs. 19	2	0.9973	0.9972	0.031	0.9677	0.1389	2	0.997084244897959	0.997079102040816	0.0320324897959184	0.98314506122449	0.13334	2	0.00167378038871567	0.00167997748687571	0.00839505607048402	0.0172091595875419	0.019070642667847
1359	11 vs. 19	3	0.9636	0.9451	0.0875	0.96	0.3056	3	0.978327836734694	0.963547755102041	0.0622181224489796	0.938534775510204	0.40110987755102	3	0.0162470837193968	0.0272804614226038	0.0217686779856555	0.0527818480087459	0.0383368411702942
1360	11 vs. 20	1	0.9988	0.999	0.0278	0.9714	0.0278	1	0.998942612244898	0.998988244897959	0.0261798367346939	0.973154367346939	0.0477981224489796	1	0.000443190711999786	0.000438776826387494	0.00526656986503144	0.0241848423728632	0.0280526463759508
1361	11 vs. 20	2	0.9985	0.9984	0.0228	0.9677	0.1389	2	0.997084244897959	0.997079102040816	0.0320324897959184	0.98314506122449	0.13334	2	0.00167378038871567	0.00167997748687571	0.00839505607048402	0.0172091595875419	0.019070642667847
1362	11 vs. 20	3	0.9556	0.9346	0.0935	0.9167	0.3333	3	0.978327836734694	0.963547755102041	0.0622181224489796	0.938534775510204	0.40110987755102	3	0.0162470837193968	0.0272804614226038	0.0217686779856555	0.0527818480087459	0.0383368411702942
1363	11 vs. 21	1	0.9989	0.9989	0.0269	0.9714	0.0278	1	0.998942612244898	0.998988244897959	0.0261798367346939	0.973154367346939	0.0477981224489796	1	0.000443190711999786	0.000438776826387494	0.00526656986503144	0.0241848423728632	0.0280526463759508
1364	11 vs. 21	2	0.9977	0.9976	0.0287	0.9677	0.1389	2	0.997084244897959	0.997079102040816	0.0320324897959184	0.98314506122449	0.13334	2	0.00167378038871567	0.00167997748687571	0.00839505607048402	0.0172091595875419	0.019070642667847
1365	11 vs. 21	3	0.9488	0.9207	0.1021	0.9565	0.3611	3	0.978327836734694	0.963547755102041	0.0622181224489796	0.938534775510204	0.40110987755102	3	0.0162470837193968	0.0272804614226038	0.0217686779856555	0.0527818480087459	0.0383368411702942
1366	11 vs. 22	1	0.9986	0.9986	0.0297	1	0.0556	1	0.998942612244898	0.998988244897959	0.0261798367346939	0.973154367346939	0.0477981224489796	1	0.000443190711999786	0.000438776826387494	0.00526656986503144	0.0241848423728632	0.0280526463759508
1367	11 vs. 22	2	0.9973	0.9972	0.0322	0.9677	0.1389	2	0.997084244897959	0.997079102040816	0.0320324897959184	0.98314506122449	0.13334	2	0.00167378038871567	0.00167997748687571	0.00839505607048402	0.0172091595875419	0.019070642667847
1368	11 vs. 22	3	0.9683	0.9503	0.0788	0.9565	0.3611	3	0.978327836734694	0.963547755102041	0.0622181224489796	0.938534775510204	0.40110987755102	3	0.0162470837193968	0.0272804614226038	0.0217686779856555	0.0527818480087459	0.0383368411702942
1369	11 vs. 23	1	0.9991	0.9991	0.0237	1	0.0556	1	0.998942612244898	0.998988244897959	0.0261798367346939	0.973154367346939	0.0477981224489796	1	0.000443190711999786	0.000438776826387494	0.00526656986503144	0.0241848423728632	0.0280526463759508
1370	11 vs. 23	2	0.9976	0.9975	0.0291	0.9677	0.1389	2	0.997084244897959	0.997079102040816	0.0320324897959184	0.98314506122449	0.13334	2	0.00167378038871567	0.00167997748687571	0.00839505607048402	0.0172091595875419	0.019070642667847
1371	11 vs. 23	3	0.9541	0.9343	0.0949	0.9565	0.3611	3	0.978327836734694	0.963547755102041	0.0622181224489796	0.938534775510204	0.40110987755102	3	0.0162470837193968	0.0272804614226038	0.0217686779856555	0.0527818480087459	0.0383368411702942
1372	11 vs. 24	1	0.999	0.999	0.0259	0.9714	0.0278	1	0.998942612244898	0.998988244897959	0.0261798367346939	0.973154367346939	0.0477981224489796	1	0.000443190711999786	0.000438776826387494	0.00526656986503144	0.0241848423728632	0.0280526463759508
1373	11 vs. 24	2	0.9975	0.9975	0.0305	1	0.1667	2	0.997084244897959	0.997079102040816	0.0320324897959184	0.98314506122449	0.13334	2	0.00167378038871567	0.00167997748687571	0.00839505607048402	0.0172091595875419	0.019070642667847
1374	11 vs. 24	3	0.9378	0.8994	0.1077	0.9565	0.3611	3	0.978327836734694	0.963547755102041	0.0622181224489796	0.938534775510204	0.40110987755102	3	0.0162470837193968	0.0272804614226038	0.0217686779856555	0.0527818480087459	0.0383368411702942
1375	11 vs. 25	1	0.999	0.999	0.0267	0.9714	0.0278	1	0.998942612244898	0.998988244897959	0.0261798367346939	0.973154367346939	0.0477981224489796	1	0.000443190711999786	0.000438776826387494	0.00526656986503144	0.0241848423728632	0.0280526463759508
1376	11 vs. 25	2	0.9986	0.9987	0.022	1	0.1667	2	0.997084244897959	0.997079102040816	0.0320324897959184	0.98314506122449	0.13334	2	0.00167378038871567	0.00167997748687571	0.00839505607048402	0.0172091595875419	0.019070642667847
1377	11 vs. 25	3	0.9638	0.9473	0.0879	0.9565	0.3611	3	0.978327836734694	0.963547755102041	0.0622181224489796	0.938534775510204	0.40110987755102	3	0.0162470837193968	0.0272804614226038	0.0217686779856555	0.0527818480087459	0.0383368411702942
1378	11 vs. 26	1	0.9994	0.9994	0.0226	0.9714	0.0278	1	0.998942612244898	0.998988244897959	0.0261798367346939	0.973154367346939	0.0477981224489796	1	0.000443190711999786	0.000438776826387494	0.00526656986503144	0.0241848423728632	0.0280526463759508
1379	11 vs. 26	2	0.9988	0.9988	0.0234	1	0.1667	2	0.997084244897959	0.997079102040816	0.0320324897959184	0.98314506122449	0.13334	2	0.00167378038871567	0.00167997748687571	0.00839505607048402	0.0172091595875419	0.019070642667847
1380	11 vs. 26	3	0.945	0.9134	0.1067	0.9565	0.3611	3	0.978327836734694	0.963547755102041	0.0622181224489796	0.938534775510204	0.40110987755102	3	0.0162470837193968	0.0272804614226038	0.0217686779856555	0.0527818480087459	0.0383368411702942
1381	11 vs. 27	1	0.9986	0.9986	0.03	0.9697	0.0833	1	0.998942612244898	0.998988244897959	0.0261798367346939	0.973154367346939	0.0477981224489796	1	0.000443190711999786	0.000438776826387494	0.00526656986503144	0.0241848423728632	0.0280526463759508
1382	11 vs. 27	2	0.996	0.996	0.0388	0.9677	0.1389	2	0.997084244897959	0.997079102040816	0.0320324897959184	0.98314506122449	0.13334	2	0.00167378038871567	0.00167997748687571	0.00839505607048402	0.0172091595875419	0.019070642667847
1383	11 vs. 27	3	0.9039	0.8465	0.1349	0.7619	0.4167	3	0.978327836734694	0.963547755102041	0.0622181224489796	0.938534775510204	0.40110987755102	3	0.0162470837193968	0.0272804614226038	0.0217686779856555	0.0527818480087459	0.0383368411702942
1384	11 vs. 28	1	0.9986	0.9987	0.0297	0.9714	0.0278	1	0.998942612244898	0.998988244897959	0.0261798367346939	0.973154367346939	0.0477981224489796	1	0.000443190711999786	0.000438776826387494	0.00526656986503144	0.0241848423728632	0.0280526463759508
1385	11 vs. 28	2	0.9942	0.9941	0.0454	0.9677	0.1389	2	0.997084244897959	0.997079102040816	0.0320324897959184	0.98314506122449	0.13334	2	0.00167378038871567	0.00167997748687571	0.00839505607048402	0.0172091595875419	0.019070642667847
1386	11 vs. 28	3	0.9545	0.93	0.0931	0.9091	0.3889	3	0.978327836734694	0.963547755102041	0.0622181224489796	0.938534775510204	0.40110987755102	3	0.0162470837193968	0.0272804614226038	0.0217686779856555	0.0527818480087459	0.0383368411702942
1387	11 vs. 29	1	0.9994	0.9995	0.0208	1	0.0556	1	0.998942612244898	0.998988244897959	0.0261798367346939	0.973154367346939	0.0477981224489796	1	0.000443190711999786	0.000438776826387494	0.00526656986503144	0.0241848423728632	0.0280526463759508
1388	11 vs. 29	2	0.9972	0.9971	0.0315	0.9677	0.1389	2	0.997084244897959	0.997079102040816	0.0320324897959184	0.98314506122449	0.13334	2	0.00167378038871567	0.00167997748687571	0.00839505607048402	0.0172091595875419	0.019070642667847
1389	11 vs. 29	3	0.992	0.9875	0.039	0.9565	0.3611	3	0.978327836734694	0.963547755102041	0.0622181224489796	0.938534775510204	0.40110987755102	3	0.0162470837193968	0.0272804614226038	0.0217686779856555	0.0527818480087459	0.0383368411702942
1390	11 vs. 30	1	0.9991	0.9992	0.0234	0.9714	0.0278	1	0.998942612244898	0.998988244897959	0.0261798367346939	0.973154367346939	0.0477981224489796	1	0.000443190711999786	0.000438776826387494	0.00526656986503144	0.0241848423728632	0.0280526463759508
1391	11 vs. 30	2	0.9989	0.9989	0.0192	1	0.1667	2	0.997084244897959	0.997079102040816	0.0320324897959184	0.98314506122449	0.13334	2	0.00167378038871567	0.00167997748687571	0.00839505607048402	0.0172091595875419	0.019070642667847
1392	11 vs. 30	3	0.9071	0.8473	0.1332	0.8571	0.4167	3	0.978327836734694	0.963547755102041	0.0622181224489796	0.938534775510204	0.40110987755102	3	0.0162470837193968	0.0272804614226038	0.0217686779856555	0.0527818480087459	0.0383368411702942
1393	11 vs. 31	1	0.9987	0.9987	0.0293	0.9412	0.0556	1	0.998942612244898	0.998988244897959	0.0261798367346939	0.973154367346939	0.0477981224489796	1	0.000443190711999786	0.000438776826387494	0.00526656986503144	0.0241848423728632	0.0280526463759508
1394	11 vs. 31	2	0.9963	0.9962	0.0359	0.9677	0.1389	2	0.997084244897959	0.997079102040816	0.0320324897959184	0.98314506122449	0.13334	2	0.00167378038871567	0.00167997748687571	0.00839505607048402	0.0172091595875419	0.019070642667847
1395	11 vs. 31	3	0.9171	0.8638	0.1259	0.9091	0.3889	3	0.978327836734694	0.963547755102041	0.0622181224489796	0.938534775510204	0.40110987755102	3	0.0162470837193968	0.0272804614226038	0.0217686779856555	0.0527818480087459	0.0383368411702942
1396	11 vs. 32	1	0.999	0.999	0.0259	1	0.0556	1	0.998942612244898	0.998988244897959	0.0261798367346939	0.973154367346939	0.0477981224489796	1	0.000443190711999786	0.000438776826387494	0.00526656986503144	0.0241848423728632	0.0280526463759508
1397	11 vs. 32	2	0.995	0.9948	0.0461	0.9677	0.1389	2	0.997084244897959	0.997079102040816	0.0320324897959184	0.98314506122449	0.13334	2	0.00167378038871567	0.00167997748687571	0.00839505607048402	0.0172091595875419	0.019070642667847
1398	11 vs. 32	3	0.9462	0.9126	0.1022	0.9167	0.3333	3	0.978327836734694	0.963547755102041	0.0622181224489796	0.938534775510204	0.40110987755102	3	0.0162470837193968	0.0272804614226038	0.0217686779856555	0.0527818480087459	0.0383368411702942
1399	11 vs. 33	1	0.9987	0.9987	0.0287	0.9375	0.1111	1	0.998942612244898	0.998988244897959	0.0261798367346939	0.973154367346939	0.0477981224489796	1	0.000443190711999786	0.000438776826387494	0.00526656986503144	0.0241848423728632	0.0280526463759508
1400	11 vs. 33	2	0.9953	0.9951	0.0409	0.9333	0.1667	2	0.997084244897959	0.997079102040816	0.0320324897959184	0.98314506122449	0.13334	2	0.00167378038871567	0.00167997748687571	0.00839505607048402	0.0172091595875419	0.019070642667847
1401	11 vs. 33	3	0.9407	0.9077	0.1067	0.8571	0.4167	3	0.978327836734694	0.963547755102041	0.0622181224489796	0.938534775510204	0.40110987755102	3	0.0162470837193968	0.0272804614226038	0.0217686779856555	0.0527818480087459	0.0383368411702942
1402	11 vs. 34	1	0.9995	0.9995	0.0195	1	0.0556	1	0.998942612244898	0.998988244897959	0.0261798367346939	0.973154367346939	0.0477981224489796	1	0.000443190711999786	0.000438776826387494	0.00526656986503144	0.0241848423728632	0.0280526463759508
1403	11 vs. 34	2	0.9976	0.9975	0.0299	0.9677	0.1389	2	0.997084244897959	0.997079102040816	0.0320324897959184	0.98314506122449	0.13334	2	0.00167378038871567	0.00167997748687571	0.00839505607048402	0.0172091595875419	0.019070642667847
1404	11 vs. 34	3	0.9769	0.9655	0.0669	0.9565	0.3611	3	0.978327836734694	0.963547755102041	0.0622181224489796	0.938534775510204	0.40110987755102	3	0.0162470837193968	0.0272804614226038	0.0217686779856555	0.0527818480087459	0.0383368411702942
1405	11 vs. 35	1	0.9995	0.9995	0.0206	1	0.0556	1	0.998942612244898	0.998988244897959	0.0261798367346939	0.973154367346939	0.0477981224489796	1	0.000443190711999786	0.000438776826387494	0.00526656986503144	0.0241848423728632	0.0280526463759508
1406	11 vs. 35	2	0.9962	0.996	0.0394	1	0.1667	2	0.997084244897959	0.997079102040816	0.0320324897959184	0.98314506122449	0.13334	2	0.00167378038871567	0.00167997748687571	0.00839505607048402	0.0172091595875419	0.019070642667847
1407	11 vs. 35	3	0.9732	0.958	0.0717	0.9565	0.3611	3	0.978327836734694	0.963547755102041	0.0622181224489796	0.938534775510204	0.40110987755102	3	0.0162470837193968	0.0272804614226038	0.0217686779856555	0.0527818480087459	0.0383368411702942
1408	11 vs. 36	1	0.9986	0.9986	0.0299	1	0.0556	1	0.998942612244898	0.998988244897959	0.0261798367346939	0.973154367346939	0.0477981224489796	1	0.000443190711999786	0.000438776826387494	0.00526656986503144	0.0241848423728632	0.0280526463759508
1409	11 vs. 36	2	0.9939	0.9936	0.0485	0.9677	0.1389	2	0.997084244897959	0.997079102040816	0.0320324897959184	0.98314506122449	0.13334	2	0.00167378038871567	0.00167997748687571	0.00839505607048402	0.0172091595875419	0.019070642667847
1410	11 vs. 36	3	0.9585	0.9333	0.0881	0.9167	0.3333	3	0.978327836734694	0.963547755102041	0.0622181224489796	0.938534775510204	0.40110987755102	3	0.0162470837193968	0.0272804614226038	0.0217686779856555	0.0527818480087459	0.0383368411702942
1411	11 vs. 37	1	0.9993	0.9993	0.0215	0.9697	0.0833	1	0.998942612244898	0.998988244897959	0.0261798367346939	0.973154367346939	0.0477981224489796	1	0.000443190711999786	0.000438776826387494	0.00526656986503144	0.0241848423728632	0.0280526463759508
1412	11 vs. 37	2	0.9978	0.9977	0.0281	1	0.1667	2	0.997084244897959	0.997079102040816	0.0320324897959184	0.98314506122449	0.13334	2	0.00167378038871567	0.00167997748687571	0.00839505607048402	0.0172091595875419	0.019070642667847
1413	11 vs. 37	3	0.9273	0.8827	0.1186	0.9091	0.3889	3	0.978327836734694	0.963547755102041	0.0622181224489796	0.938534775510204	0.40110987755102	3	0.0162470837193968	0.0272804614226038	0.0217686779856555	0.0527818480087459	0.0383368411702942
1414	11 vs. 38	1	0.9996	0.9996	0.0197	1	0.0556	1	0.998942612244898	0.998988244897959	0.0261798367346939	0.973154367346939	0.0477981224489796	1	0.000443190711999786	0.000438776826387494	0.00526656986503144	0.0241848423728632	0.0280526463759508
1415	11 vs. 38	2	0.9979	0.9979	0.0269	0.9677	0.1389	2	0.997084244897959	0.997079102040816	0.0320324897959184	0.98314506122449	0.13334	2	0.00167378038871567	0.00167997748687571	0.00839505607048402	0.0172091595875419	0.019070642667847
1416	11 vs. 38	3	0.9234	0.8746	0.1211	0.8571	0.4167	3	0.978327836734694	0.963547755102041	0.0622181224489796	0.938534775510204	0.40110987755102	3	0.0162470837193968	0.0272804614226038	0.0217686779856555	0.0527818480087459	0.0383368411702942
1417	11 vs. 39	1	0.9991	0.9991	0.0261	1	0.0556	1	0.998942612244898	0.998988244897959	0.0261798367346939	0.973154367346939	0.0477981224489796	1	0.000443190711999786	0.000438776826387494	0.00526656986503144	0.0241848423728632	0.0280526463759508
1418	11 vs. 39	2	0.9966	0.9964	0.0351	1	0.1667	2	0.997084244897959	0.997079102040816	0.0320324897959184	0.98314506122449	0.13334	2	0.00167378038871567	0.00167997748687571	0.00839505607048402	0.0172091595875419	0.019070642667847
1419	11 vs. 39	3	0.9616	0.9396	0.0861	0.9565	0.3611	3	0.978327836734694	0.963547755102041	0.0622181224489796	0.938534775510204	0.40110987755102	3	0.0162470837193968	0.0272804614226038	0.0217686779856555	0.0527818480087459	0.0383368411702942
1420	11 vs. 40	1	0.9994	0.9994	0.0194	1	0.0556	1	0.998942612244898	0.998988244897959	0.0261798367346939	0.973154367346939	0.0477981224489796	1	0.000443190711999786	0.000438776826387494	0.00526656986503144	0.0241848423728632	0.0280526463759508
1421	11 vs. 40	2	0.9977	0.9976	0.0299	0.9677	0.1389	2	0.997084244897959	0.997079102040816	0.0320324897959184	0.98314506122449	0.13334	2	0.00167378038871567	0.00167997748687571	0.00839505607048402	0.0172091595875419	0.019070642667847
1422	11 vs. 40	3	0.9318	0.8887	0.1152	0.8571	0.4167	3	0.978327836734694	0.963547755102041	0.0622181224489796	0.938534775510204	0.40110987755102	3	0.0162470837193968	0.0272804614226038	0.0217686779856555	0.0527818480087459	0.0383368411702942
1423	11 vs. 41	1	0.999	0.999	0.0257	0.9714	0.0278	1	0.998942612244898	0.998988244897959	0.0261798367346939	0.973154367346939	0.0477981224489796	1	0.000443190711999786	0.000438776826387494	0.00526656986503144	0.0241848423728632	0.0280526463759508
1424	11 vs. 41	2	0.998	0.9979	0.0262	1	0.1667	2	0.997084244897959	0.997079102040816	0.0320324897959184	0.98314506122449	0.13334	2	0.00167378038871567	0.00167997748687571	0.00839505607048402	0.0172091595875419	0.019070642667847
1425	11 vs. 41	3	0.9604	0.9378	0.0873	0.9167	0.3333	3	0.978327836734694	0.963547755102041	0.0622181224489796	0.938534775510204	0.40110987755102	3	0.0162470837193968	0.0272804614226038	0.0217686779856555	0.0527818480087459	0.0383368411702942
1426	11 vs. 42	1	0.9991	0.9991	0.0282	0.9714	0.0278	1	0.998942612244898	0.998988244897959	0.0261798367346939	0.973154367346939	0.0477981224489796	1	0.000443190711999786	0.000438776826387494	0.00526656986503144	0.0241848423728632	0.0280526463759508
1427	11 vs. 42	2	0.9924	0.9921	0.0535	0.9677	0.1389	2	0.997084244897959	0.997079102040816	0.0320324897959184	0.98314506122449	0.13334	2	0.00167378038871567	0.00167997748687571	0.00839505607048402	0.0172091595875419	0.019070642667847
1428	11 vs. 42	3	0.9748	0.9604	0.0697	0.9091	0.3889	3	0.978327836734694	0.963547755102041	0.0622181224489796	0.938534775510204	0.40110987755102	3	0.0162470837193968	0.0272804614226038	0.0217686779856555	0.0527818480087459	0.0383368411702942
1429	11 vs. 43	1	0.9992	0.9992	0.0229	1	0.0556	1	0.998942612244898	0.998988244897959	0.0261798367346939	0.973154367346939	0.0477981224489796	1	0.000443190711999786	0.000438776826387494	0.00526656986503144	0.0241848423728632	0.0280526463759508
1430	11 vs. 43	2	0.9979	0.9979	0.0286	0.9677	0.1389	2	0.997084244897959	0.997079102040816	0.0320324897959184	0.98314506122449	0.13334	2	0.00167378038871567	0.00167997748687571	0.00839505607048402	0.0172091595875419	0.019070642667847
1431	11 vs. 43	3	0.9248	0.8807	0.12	0.8571	0.4167	3	0.978327836734694	0.963547755102041	0.0622181224489796	0.938534775510204	0.40110987755102	3	0.0162470837193968	0.0272804614226038	0.0217686779856555	0.0527818480087459	0.0383368411702942
1432	11 vs. 44	1	0.9993	0.9993	0.0218	1	0.0556	1	0.998942612244898	0.998988244897959	0.0261798367346939	0.973154367346939	0.0477981224489796	1	0.000443190711999786	0.000438776826387494	0.00526656986503144	0.0241848423728632	0.0280526463759508
1433	11 vs. 44	2	0.996	0.9958	0.0375	0.9677	0.1389	2	0.997084244897959	0.997079102040816	0.0320324897959184	0.98314506122449	0.13334	2	0.00167378038871567	0.00167997748687571	0.00839505607048402	0.0172091595875419	0.019070642667847
1434	11 vs. 44	3	0.9931	0.9906	0.0372	0.9565	0.3611	3	0.978327836734694	0.963547755102041	0.0622181224489796	0.938534775510204	0.40110987755102	3	0.0162470837193968	0.0272804614226038	0.0217686779856555	0.0527818480087459	0.0383368411702942
1435	11 vs. 45	1	0.9992	0.9992	0.0235	1	0.0556	1	0.998942612244898	0.998988244897959	0.0261798367346939	0.973154367346939	0.0477981224489796	1	0.000443190711999786	0.000438776826387494	0.00526656986503144	0.0241848423728632	0.0280526463759508
1436	11 vs. 45	2	0.9966	0.9965	0.0378	0.9677	0.1389	2	0.997084244897959	0.997079102040816	0.0320324897959184	0.98314506122449	0.13334	2	0.00167378038871567	0.00167997748687571	0.00839505607048402	0.0172091595875419	0.019070642667847
1437	11 vs. 45	3	0.9688	0.9549	0.0778	0.9565	0.3611	3	0.978327836734694	0.963547755102041	0.0622181224489796	0.938534775510204	0.40110987755102	3	0.0162470837193968	0.0272804614226038	0.0217686779856555	0.0527818480087459	0.0383368411702942
1438	11 vs. 46	1	0.9992	0.9992	0.0227	0.9697	0.0833	1	0.998942612244898	0.998988244897959	0.0261798367346939	0.973154367346939	0.0477981224489796	1	0.000443190711999786	0.000438776826387494	0.00526656986503144	0.0241848423728632	0.0280526463759508
1439	11 vs. 46	2	0.9973	0.9974	0.0316	1	0.1667	2	0.997084244897959	0.997079102040816	0.0320324897959184	0.98314506122449	0.13334	2	0.00167378038871567	0.00167997748687571	0.00839505607048402	0.0172091595875419	0.019070642667847
1440	11 vs. 46	3	0.9423	0.9076	0.1055	0.9091	0.3889	3	0.978327836734694	0.963547755102041	0.0622181224489796	0.938534775510204	0.40110987755102	3	0.0162470837193968	0.0272804614226038	0.0217686779856555	0.0527818480087459	0.0383368411702942
1441	11 vs. 47	1	0.9993	0.9994	0.0208	1	0.0556	1	0.998942612244898	0.998988244897959	0.0261798367346939	0.973154367346939	0.0477981224489796	1	0.000443190711999786	0.000438776826387494	0.00526656986503144	0.0241848423728632	0.0280526463759508
1442	11 vs. 47	2	0.9982	0.9981	0.0258	1	0.1667	2	0.997084244897959	0.997079102040816	0.0320324897959184	0.98314506122449	0.13334	2	0.00167378038871567	0.00167997748687571	0.00839505607048402	0.0172091595875419	0.019070642667847
1443	11 vs. 47	3	0.9555	0.9292	0.0932	0.9565	0.3611	3	0.978327836734694	0.963547755102041	0.0622181224489796	0.938534775510204	0.40110987755102	3	0.0162470837193968	0.0272804614226038	0.0217686779856555	0.0527818480087459	0.0383368411702942
1444	11 vs. 48	1	0.9993	0.9993	0.0213	0.9412	0.0556	1	0.998942612244898	0.998988244897959	0.0261798367346939	0.973154367346939	0.0477981224489796	1	0.000443190711999786	0.000438776826387494	0.00526656986503144	0.0241848423728632	0.0280526463759508
1445	11 vs. 48	2	0.9969	0.9967	0.0331	0.9677	0.1389	2	0.997084244897959	0.997079102040816	0.0320324897959184	0.98314506122449	0.13334	2	0.00167378038871567	0.00167997748687571	0.00839505607048402	0.0172091595875419	0.019070642667847
1446	11 vs. 48	3	0.9674	0.9484	0.0788	0.9565	0.3611	3	0.978327836734694	0.963547755102041	0.0622181224489796	0.938534775510204	0.40110987755102	3	0.0162470837193968	0.0272804614226038	0.0217686779856555	0.0527818480087459	0.0383368411702942
1447	11 vs. 49	1	0.9995	0.9995	0.0189	0.9714	0.0278	1	0.998942612244898	0.998988244897959	0.0261798367346939	0.973154367346939	0.0477981224489796	1	0.000443190711999786	0.000438776826387494	0.00526656986503144	0.0241848423728632	0.0280526463759508
1448	11 vs. 49	2	0.9986	0.9986	0.0224	1	0.1667	2	0.997084244897959	0.997079102040816	0.0320324897959184	0.98314506122449	0.13334	2	0.00167378038871567	0.00167997748687571	0.00839505607048402	0.0172091595875419	0.019070642667847
1449	11 vs. 49	3	0.9762	0.9636	0.0708	0.9565	0.3611	3	0.978327836734694	0.963547755102041	0.0622181224489796	0.938534775510204	0.40110987755102	3	0.0162470837193968	0.0272804614226038	0.0217686779856555	0.0527818480087459	0.0383368411702942
1450	11 vs. 50	1	0.9991	0.9992	0.0246	0.9375	0.1111	1	0.998942612244898	0.998988244897959	0.0261798367346939	0.973154367346939	0.0477981224489796	1	0.000443190711999786	0.000438776826387494	0.00526656986503144	0.0241848423728632	0.0280526463759508
1451	11 vs. 50	2	0.9944	0.9942	0.0454	0.9677	0.1389	2	0.997084244897959	0.997079102040816	0.0320324897959184	0.98314506122449	0.13334	2	0.00167378038871567	0.00167997748687571	0.00839505607048402	0.0172091595875419	0.019070642667847
1452	11 vs. 50	3	0.9421	0.9086	0.1056	0.9091	0.3889	3	0.978327836734694	0.963547755102041	0.0622181224489796	0.938534775510204	0.40110987755102	3	0.0162470837193968	0.0272804614226038	0.0217686779856555	0.0527818480087459	0.0383368411702942
1453	12 vs. 13	1	0.9988	0.9988	0.0279	0.9714	0.0278	1	0.998942612244898	0.998988244897959	0.0261798367346939	0.973154367346939	0.0477981224489796	1	0.000443190711999786	0.000438776826387494	0.00526656986503144	0.0241848423728632	0.0280526463759508
1454	12 vs. 13	2	0.9983	0.9982	0.0276	0.9677	0.1389	2	0.997084244897959	0.997079102040816	0.0320324897959184	0.98314506122449	0.13334	2	0.00167378038871567	0.00167997748687571	0.00839505607048402	0.0172091595875419	0.019070642667847
1455	12 vs. 13	3	0.9861	0.9775	0.051	0.9474	0.4722	3	0.978327836734694	0.963547755102041	0.0622181224489796	0.938534775510204	0.40110987755102	3	0.0162470837193968	0.0272804614226038	0.0217686779856555	0.0527818480087459	0.0383368411702942
1456	12 vs. 14	1	0.9995	0.9995	0.018	1	0	1	0.998942612244898	0.998988244897959	0.0261798367346939	0.973154367346939	0.0477981224489796	1	0.000443190711999786	0.000438776826387494	0.00526656986503144	0.0241848423728632	0.0280526463759508
1457	12 vs. 14	2	0.9984	0.9983	0.0246	0.9677	0.1389	2	0.997084244897959	0.997079102040816	0.0320324897959184	0.98314506122449	0.13334	2	0.00167378038871567	0.00167997748687571	0.00839505607048402	0.0172091595875419	0.019070642667847
1458	12 vs. 14	3	0.9684	0.9444	0.0788	0.8571	0.4167	3	0.978327836734694	0.963547755102041	0.0622181224489796	0.938534775510204	0.40110987755102	3	0.0162470837193968	0.0272804614226038	0.0217686779856555	0.0527818480087459	0.0383368411702942
1459	12 vs. 15	1	0.9987	0.9986	0.0295	0.9714	0.0278	1	0.998942612244898	0.998988244897959	0.0261798367346939	0.973154367346939	0.0477981224489796	1	0.000443190711999786	0.000438776826387494	0.00526656986503144	0.0241848423728632	0.0280526463759508
1460	12 vs. 15	2	0.9981	0.9984	0.0264	1	0.1667	2	0.997084244897959	0.997079102040816	0.0320324897959184	0.98314506122449	0.13334	2	0.00167378038871567	0.00167997748687571	0.00839505607048402	0.0172091595875419	0.019070642667847
1461	12 vs. 15	3	0.9505	0.9054	0.0985	0.9	0.4444	3	0.978327836734694	0.963547755102041	0.0622181224489796	0.938534775510204	0.40110987755102	3	0.0162470837193968	0.0272804614226038	0.0217686779856555	0.0527818480087459	0.0383368411702942
1462	12 vs. 16	1	0.9991	0.9992	0.0233	0.9714	0.0278	1	0.998942612244898	0.998988244897959	0.0261798367346939	0.973154367346939	0.0477981224489796	1	0.000443190711999786	0.000438776826387494	0.00526656986503144	0.0241848423728632	0.0280526463759508
1463	12 vs. 16	2	0.9974	0.9974	0.032	0.9677	0.1389	2	0.997084244897959	0.997079102040816	0.0320324897959184	0.98314506122449	0.13334	2	0.00167378038871567	0.00167997748687571	0.00839505607048402	0.0172091595875419	0.019070642667847
1464	12 vs. 16	3	0.9621	0.9395	0.0859	0.8571	0.4167	3	0.978327836734694	0.963547755102041	0.0622181224489796	0.938534775510204	0.40110987755102	3	0.0162470837193968	0.0272804614226038	0.0217686779856555	0.0527818480087459	0.0383368411702942
1465	12 vs. 17	1	0.9987	0.9987	0.0288	0.9714	0.0278	1	0.998942612244898	0.998988244897959	0.0261798367346939	0.973154367346939	0.0477981224489796	1	0.000443190711999786	0.000438776826387494	0.00526656986503144	0.0241848423728632	0.0280526463759508
1466	12 vs. 17	2	0.9959	0.9958	0.0382	0.9677	0.1389	2	0.997084244897959	0.997079102040816	0.0320324897959184	0.98314506122449	0.13334	2	0.00167378038871567	0.00167997748687571	0.00839505607048402	0.0172091595875419	0.019070642667847
1467	12 vs. 17	3	0.9519	0.9083	0.0963	0.9	0.4444	3	0.978327836734694	0.963547755102041	0.0622181224489796	0.938534775510204	0.40110987755102	3	0.0162470837193968	0.0272804614226038	0.0217686779856555	0.0527818480087459	0.0383368411702942
1468	12 vs. 18	1	0.9986	0.9986	0.0311	0.9714	0.0278	1	0.998942612244898	0.998988244897959	0.0261798367346939	0.973154367346939	0.0477981224489796	1	0.000443190711999786	0.000438776826387494	0.00526656986503144	0.0241848423728632	0.0280526463759508
1469	12 vs. 18	2	0.9968	0.9972	0.0332	1	0.1667	2	0.997084244897959	0.997079102040816	0.0320324897959184	0.98314506122449	0.13334	2	0.00167378038871567	0.00167997748687571	0.00839505607048402	0.0172091595875419	0.019070642667847
1470	12 vs. 18	3	0.9782	0.9587	0.0674	0.9	0.4444	3	0.978327836734694	0.963547755102041	0.0622181224489796	0.938534775510204	0.40110987755102	3	0.0162470837193968	0.0272804614226038	0.0217686779856555	0.0527818480087459	0.0383368411702942
1471	12 vs. 19	1	0.998	0.998	0.0356	0.9714	0.0278	1	0.998942612244898	0.998988244897959	0.0261798367346939	0.973154367346939	0.0477981224489796	1	0.000443190711999786	0.000438776826387494	0.00526656986503144	0.0241848423728632	0.0280526463759508
1472	12 vs. 19	2	0.9976	0.9976	0.029	0.9677	0.1389	2	0.997084244897959	0.997079102040816	0.0320324897959184	0.98314506122449	0.13334	2	0.00167378038871567	0.00167997748687571	0.00839505607048402	0.0172091595875419	0.019070642667847
1473	12 vs. 19	3	0.943	0.9203	0.1086	0.8182	0.3889	3	0.978327836734694	0.963547755102041	0.0622181224489796	0.938534775510204	0.40110987755102	3	0.0162470837193968	0.0272804614226038	0.0217686779856555	0.0527818480087459	0.0383368411702942
1474	12 vs. 20	1	0.9991	0.9991	0.025	1	0	1	0.998942612244898	0.998988244897959	0.0261798367346939	0.973154367346939	0.0477981224489796	1	0.000443190711999786	0.000438776826387494	0.00526656986503144	0.0241848423728632	0.0280526463759508
1475	12 vs. 20	2	0.9971	0.997	0.0319	0.9677	0.1389	2	0.997084244897959	0.997079102040816	0.0320324897959184	0.98314506122449	0.13334	2	0.00167378038871567	0.00167997748687571	0.00839505607048402	0.0172091595875419	0.019070642667847
1476	12 vs. 20	3	0.9558	0.9154	0.0932	0.8571	0.4167	3	0.978327836734694	0.963547755102041	0.0622181224489796	0.938534775510204	0.40110987755102	3	0.0162470837193968	0.0272804614226038	0.0217686779856555	0.0527818480087459	0.0383368411702942
1477	12 vs. 21	1	0.9995	0.9995	0.0189	1	0	1	0.998942612244898	0.998988244897959	0.0261798367346939	0.973154367346939	0.0477981224489796	1	0.000443190711999786	0.000438776826387494	0.00526656986503144	0.0241848423728632	0.0280526463759508
1478	12 vs. 21	2	0.9983	0.9982	0.0252	0.9677	0.1389	2	0.997084244897959	0.997079102040816	0.0320324897959184	0.98314506122449	0.13334	2	0.00167378038871567	0.00167997748687571	0.00839505607048402	0.0172091595875419	0.019070642667847
1479	12 vs. 21	3	0.9608	0.9255	0.0897	0.9	0.4444	3	0.978327836734694	0.963547755102041	0.0622181224489796	0.938534775510204	0.40110987755102	3	0.0162470837193968	0.0272804614226038	0.0217686779856555	0.0527818480087459	0.0383368411702942
1480	12 vs. 22	1	0.9979	0.9979	0.0366	0.9714	0.0278	1	0.998942612244898	0.998988244897959	0.0261798367346939	0.973154367346939	0.0477981224489796	1	0.000443190711999786	0.000438776826387494	0.00526656986503144	0.0241848423728632	0.0280526463759508
1481	12 vs. 22	2	0.9982	0.9982	0.0263	0.9677	0.1389	2	0.997084244897959	0.997079102040816	0.0320324897959184	0.98314506122449	0.13334	2	0.00167378038871567	0.00167997748687571	0.00839505607048402	0.0172091595875419	0.019070642667847
1482	12 vs. 22	3	0.9526	0.914	0.0961	0.9	0.4444	3	0.978327836734694	0.963547755102041	0.0622181224489796	0.938534775510204	0.40110987755102	3	0.0162470837193968	0.0272804614226038	0.0217686779856555	0.0527818480087459	0.0383368411702942
1483	12 vs. 23	1	0.9986	0.9985	0.0306	0.9714	0.0278	1	0.998942612244898	0.998988244897959	0.0261798367346939	0.973154367346939	0.0477981224489796	1	0.000443190711999786	0.000438776826387494	0.00526656986503144	0.0241848423728632	0.0280526463759508
1484	12 vs. 23	2	0.9988	0.9987	0.0212	0.9677	0.1389	2	0.997084244897959	0.997079102040816	0.0320324897959184	0.98314506122449	0.13334	2	0.00167378038871567	0.00167997748687571	0.00839505607048402	0.0172091595875419	0.019070642667847
1485	12 vs. 23	3	0.9672	0.9375	0.0803	0.9	0.4444	3	0.978327836734694	0.963547755102041	0.0622181224489796	0.938534775510204	0.40110987755102	3	0.0162470837193968	0.0272804614226038	0.0217686779856555	0.0527818480087459	0.0383368411702942
1486	12 vs. 24	1	0.9994	0.9994	0.0197	1	0	1	0.998942612244898	0.998988244897959	0.0261798367346939	0.973154367346939	0.0477981224489796	1	0.000443190711999786	0.000438776826387494	0.00526656986503144	0.0241848423728632	0.0280526463759508
1487	12 vs. 24	2	0.999	0.9989	0.0201	1	0.1667	2	0.997084244897959	0.997079102040816	0.0320324897959184	0.98314506122449	0.13334	2	0.00167378038871567	0.00167997748687571	0.00839505607048402	0.0172091595875419	0.019070642667847
1488	12 vs. 24	3	0.991	0.9834	0.041	0.9	0.4444	3	0.978327836734694	0.963547755102041	0.0622181224489796	0.938534775510204	0.40110987755102	3	0.0162470837193968	0.0272804614226038	0.0217686779856555	0.0527818480087459	0.0383368411702942
1489	12 vs. 25	1	0.999	0.999	0.0261	1	0	1	0.998942612244898	0.998988244897959	0.0261798367346939	0.973154367346939	0.0477981224489796	1	0.000443190711999786	0.000438776826387494	0.00526656986503144	0.0241848423728632	0.0280526463759508
1490	12 vs. 25	2	0.9985	0.9985	0.0226	1	0.1667	2	0.997084244897959	0.997079102040816	0.0320324897959184	0.98314506122449	0.13334	2	0.00167378038871567	0.00167997748687571	0.00839505607048402	0.0172091595875419	0.019070642667847
1491	12 vs. 25	3	0.9612	0.9261	0.091	0.9	0.4444	3	0.978327836734694	0.963547755102041	0.0622181224489796	0.938534775510204	0.40110987755102	3	0.0162470837193968	0.0272804614226038	0.0217686779856555	0.0527818480087459	0.0383368411702942
1492	12 vs. 26	1	0.9993	0.9993	0.0228	1	0	1	0.998942612244898	0.998988244897959	0.0261798367346939	0.973154367346939	0.0477981224489796	1	0.000443190711999786	0.000438776826387494	0.00526656986503144	0.0241848423728632	0.0280526463759508
1493	12 vs. 26	2	0.999	0.999	0.0208	1	0.1667	2	0.997084244897959	0.997079102040816	0.0320324897959184	0.98314506122449	0.13334	2	0.00167378038871567	0.00167997748687571	0.00839505607048402	0.0172091595875419	0.019070642667847
1494	12 vs. 26	3	0.974	0.9508	0.0747	0.9	0.4444	3	0.978327836734694	0.963547755102041	0.0622181224489796	0.938534775510204	0.40110987755102	3	0.0162470837193968	0.0272804614226038	0.0217686779856555	0.0527818480087459	0.0383368411702942
1495	12 vs. 27	1	0.9987	0.9988	0.0288	0.9412	0.0556	1	0.998942612244898	0.998988244897959	0.0261798367346939	0.973154367346939	0.0477981224489796	1	0.000443190711999786	0.000438776826387494	0.00526656986503144	0.0241848423728632	0.0280526463759508
1496	12 vs. 27	2	0.9972	0.9974	0.0328	0.9677	0.1389	2	0.997084244897959	0.997079102040816	0.0320324897959184	0.98314506122449	0.13334	2	0.00167378038871567	0.00167997748687571	0.00839505607048402	0.0172091595875419	0.019070642667847
1497	12 vs. 27	3	0.9834	0.979	0.0559	0.8889	0.5	3	0.978327836734694	0.963547755102041	0.0622181224489796	0.938534775510204	0.40110987755102	3	0.0162470837193968	0.0272804614226038	0.0217686779856555	0.0527818480087459	0.0383368411702942
1498	12 vs. 28	1	0.9987	0.9989	0.0283	1	0	1	0.998942612244898	0.998988244897959	0.0261798367346939	0.973154367346939	0.0477981224489796	1	0.000443190711999786	0.000438776826387494	0.00526656986503144	0.0241848423728632	0.0280526463759508
1499	12 vs. 28	2	0.9967	0.997	0.034	0.9677	0.1389	2	0.997084244897959	0.997079102040816	0.0320324897959184	0.98314506122449	0.13334	2	0.00167378038871567	0.00167997748687571	0.00839505607048402	0.0172091595875419	0.019070642667847
1500	12 vs. 28	3	0.9726	0.9482	0.072	0.9474	0.4722	3	0.978327836734694	0.963547755102041	0.0622181224489796	0.938534775510204	0.40110987755102	3	0.0162470837193968	0.0272804614226038	0.0217686779856555	0.0527818480087459	0.0383368411702942
1501	12 vs. 29	1	0.9989	0.9989	0.0274	0.9714	0.0278	1	0.998942612244898	0.998988244897959	0.0261798367346939	0.973154367346939	0.0477981224489796	1	0.000443190711999786	0.000438776826387494	0.00526656986503144	0.0241848423728632	0.0280526463759508
1502	12 vs. 29	2	0.9986	0.9987	0.0225	0.9677	0.1389	2	0.997084244897959	0.997079102040816	0.0320324897959184	0.98314506122449	0.13334	2	0.00167378038871567	0.00167997748687571	0.00839505607048402	0.0172091595875419	0.019070642667847
1503	12 vs. 29	3	0.925	0.8717	0.119	0.9	0.4444	3	0.978327836734694	0.963547755102041	0.0622181224489796	0.938534775510204	0.40110987755102	3	0.0162470837193968	0.0272804614226038	0.0217686779856555	0.0527818480087459	0.0383368411702942
1504	12 vs. 30	1	0.9987	0.9987	0.0293	1	0	1	0.998942612244898	0.998988244897959	0.0261798367346939	0.973154367346939	0.0477981224489796	1	0.000443190711999786	0.000438776826387494	0.00526656986503144	0.0241848423728632	0.0280526463759508
1505	12 vs. 30	2	0.9991	0.9992	0.0176	1	0.1667	2	0.997084244897959	0.997079102040816	0.0320324897959184	0.98314506122449	0.13334	2	0.00167378038871567	0.00167997748687571	0.00839505607048402	0.0172091595875419	0.019070642667847
1506	12 vs. 30	3	0.9963	0.9932	0.0266	1	0.5	3	0.978327836734694	0.963547755102041	0.0622181224489796	0.938534775510204	0.40110987755102	3	0.0162470837193968	0.0272804614226038	0.0217686779856555	0.0527818480087459	0.0383368411702942
1507	12 vs. 31	1	0.9985	0.9985	0.0311	0.9714	0.0278	1	0.998942612244898	0.998988244897959	0.0261798367346939	0.973154367346939	0.0477981224489796	1	0.000443190711999786	0.000438776826387494	0.00526656986503144	0.0241848423728632	0.0280526463759508
1508	12 vs. 31	2	0.9983	0.9982	0.0249	0.9677	0.1389	2	0.997084244897959	0.997079102040816	0.0320324897959184	0.98314506122449	0.13334	2	0.00167378038871567	0.00167997748687571	0.00839505607048402	0.0172091595875419	0.019070642667847
1509	12 vs. 31	3	0.9896	0.9815	0.0447	0.9474	0.4722	3	0.978327836734694	0.963547755102041	0.0622181224489796	0.938534775510204	0.40110987755102	3	0.0162470837193968	0.0272804614226038	0.0217686779856555	0.0527818480087459	0.0383368411702942
1510	12 vs. 32	1	0.999	0.999	0.0262	0.9714	0.0278	1	0.998942612244898	0.998988244897959	0.0261798367346939	0.973154367346939	0.0477981224489796	1	0.000443190711999786	0.000438776826387494	0.00526656986503144	0.0241848423728632	0.0280526463759508
1511	12 vs. 32	2	0.9982	0.9981	0.0306	0.9677	0.1389	2	0.997084244897959	0.997079102040816	0.0320324897959184	0.98314506122449	0.13334	2	0.00167378038871567	0.00167997748687571	0.00839505607048402	0.0172091595875419	0.019070642667847
1512	12 vs. 32	3	0.9845	0.9739	0.0552	0.8571	0.4167	3	0.978327836734694	0.963547755102041	0.0622181224489796	0.938534775510204	0.40110987755102	3	0.0162470837193968	0.0272804614226038	0.0217686779856555	0.0527818480087459	0.0383368411702942
1513	12 vs. 33	1	0.9981	0.9982	0.0346	0.9091	0.0833	1	0.998942612244898	0.998988244897959	0.0261798367346939	0.973154367346939	0.0477981224489796	1	0.000443190711999786	0.000438776826387494	0.00526656986503144	0.0241848423728632	0.0280526463759508
1514	12 vs. 33	2	0.9942	0.994	0.0453	0.9333	0.1667	2	0.997084244897959	0.997079102040816	0.0320324897959184	0.98314506122449	0.13334	2	0.00167378038871567	0.00167997748687571	0.00839505607048402	0.0172091595875419	0.019070642667847
1515	12 vs. 33	3	0.9877	0.9769	0.0487	1	0.5	3	0.978327836734694	0.963547755102041	0.0622181224489796	0.938534775510204	0.40110987755102	3	0.0162470837193968	0.0272804614226038	0.0217686779856555	0.0527818480087459	0.0383368411702942
1516	12 vs. 34	1	0.9991	0.9992	0.0248	0.9714	0.0278	1	0.998942612244898	0.998988244897959	0.0261798367346939	0.973154367346939	0.0477981224489796	1	0.000443190711999786	0.000438776826387494	0.00526656986503144	0.0241848423728632	0.0280526463759508
1517	12 vs. 34	2	0.9979	0.998	0.0274	0.9677	0.1389	2	0.997084244897959	0.997079102040816	0.0320324897959184	0.98314506122449	0.13334	2	0.00167378038871567	0.00167997748687571	0.00839505607048402	0.0172091595875419	0.019070642667847
1518	12 vs. 34	3	0.961	0.9284	0.0867	0.9	0.4444	3	0.978327836734694	0.963547755102041	0.0622181224489796	0.938534775510204	0.40110987755102	3	0.0162470837193968	0.0272804614226038	0.0217686779856555	0.0527818480087459	0.0383368411702942
1519	12 vs. 35	1	0.9991	0.9991	0.025	0.9714	0.0278	1	0.998942612244898	0.998988244897959	0.0261798367346939	0.973154367346939	0.0477981224489796	1	0.000443190711999786	0.000438776826387494	0.00526656986503144	0.0241848423728632	0.0280526463759508
1520	12 vs. 35	2	0.9978	0.9978	0.0308	1	0.1667	2	0.997084244897959	0.997079102040816	0.0320324897959184	0.98314506122449	0.13334	2	0.00167378038871567	0.00167997748687571	0.00839505607048402	0.0172091595875419	0.019070642667847
1521	12 vs. 35	3	0.9602	0.9287	0.0872	0.9	0.4444	3	0.978327836734694	0.963547755102041	0.0622181224489796	0.938534775510204	0.40110987755102	3	0.0162470837193968	0.0272804614226038	0.0217686779856555	0.0527818480087459	0.0383368411702942
1522	12 vs. 36	1	0.9993	0.9993	0.0213	0.9714	0.0278	1	0.998942612244898	0.998988244897959	0.0261798367346939	0.973154367346939	0.0477981224489796	1	0.000443190711999786	0.000438776826387494	0.00526656986503144	0.0241848423728632	0.0280526463759508
1523	12 vs. 36	2	0.9971	0.997	0.0346	0.9677	0.1389	2	0.997084244897959	0.997079102040816	0.0320324897959184	0.98314506122449	0.13334	2	0.00167378038871567	0.00167997748687571	0.00839505607048402	0.0172091595875419	0.019070642667847
1524	12 vs. 36	3	0.9782	0.9617	0.0636	0.8571	0.4167	3	0.978327836734694	0.963547755102041	0.0622181224489796	0.938534775510204	0.40110987755102	3	0.0162470837193968	0.0272804614226038	0.0217686779856555	0.0527818480087459	0.0383368411702942
1525	12 vs. 37	1	0.9983	0.9983	0.0331	0.9412	0.0556	1	0.998942612244898	0.998988244897959	0.0261798367346939	0.973154367346939	0.0477981224489796	1	0.000443190711999786	0.000438776826387494	0.00526656986503144	0.0241848423728632	0.0280526463759508
1526	12 vs. 37	2	0.9989	0.9988	0.0199	1	0.1667	2	0.997084244897959	0.997079102040816	0.0320324897959184	0.98314506122449	0.13334	2	0.00167378038871567	0.00167997748687571	0.00839505607048402	0.0172091595875419	0.019070642667847
1527	12 vs. 37	3	0.9867	0.9749	0.0509	0.9474	0.4722	3	0.978327836734694	0.963547755102041	0.0622181224489796	0.938534775510204	0.40110987755102	3	0.0162470837193968	0.0272804614226038	0.0217686779856555	0.0527818480087459	0.0383368411702942
1528	12 vs. 38	1	0.9987	0.9987	0.031	0.9714	0.0278	1	0.998942612244898	0.998988244897959	0.0261798367346939	0.973154367346939	0.0477981224489796	1	0.000443190711999786	0.000438776826387494	0.00526656986503144	0.0241848423728632	0.0280526463759508
1529	12 vs. 38	2	0.9976	0.9975	0.0291	0.9677	0.1389	2	0.997084244897959	0.997079102040816	0.0320324897959184	0.98314506122449	0.13334	2	0.00167378038871567	0.00167997748687571	0.00839505607048402	0.0172091595875419	0.019070642667847
1530	12 vs. 38	3	0.9901	0.9817	0.0437	1	0.5	3	0.978327836734694	0.963547755102041	0.0622181224489796	0.938534775510204	0.40110987755102	3	0.0162470837193968	0.0272804614226038	0.0217686779856555	0.0527818480087459	0.0383368411702942
1531	12 vs. 39	1	0.9993	0.9993	0.0221	0.9714	0.0278	1	0.998942612244898	0.998988244897959	0.0261798367346939	0.973154367346939	0.0477981224489796	1	0.000443190711999786	0.000438776826387494	0.00526656986503144	0.0241848423728632	0.0280526463759508
1532	12 vs. 39	2	0.9982	0.9982	0.0255	1	0.1667	2	0.997084244897959	0.997079102040816	0.0320324897959184	0.98314506122449	0.13334	2	0.00167378038871567	0.00167997748687571	0.00839505607048402	0.0172091595875419	0.019070642667847
1533	12 vs. 39	3	0.9785	0.9605	0.0646	0.9	0.4444	3	0.978327836734694	0.963547755102041	0.0622181224489796	0.938534775510204	0.40110987755102	3	0.0162470837193968	0.0272804614226038	0.0217686779856555	0.0527818480087459	0.0383368411702942
1534	12 vs. 40	1	0.9988	0.9988	0.0276	0.9714	0.0278	1	0.998942612244898	0.998988244897959	0.0261798367346939	0.973154367346939	0.0477981224489796	1	0.000443190711999786	0.000438776826387494	0.00526656986503144	0.0241848423728632	0.0280526463759508
1535	12 vs. 40	2	0.9979	0.9979	0.0283	0.9677	0.1389	2	0.997084244897959	0.997079102040816	0.0320324897959184	0.98314506122449	0.13334	2	0.00167378038871567	0.00167997748687571	0.00839505607048402	0.0172091595875419	0.019070642667847
1536	12 vs. 40	3	0.9851	0.9731	0.0542	1	0.5	3	0.978327836734694	0.963547755102041	0.0622181224489796	0.938534775510204	0.40110987755102	3	0.0162470837193968	0.0272804614226038	0.0217686779856555	0.0527818480087459	0.0383368411702942
1537	12 vs. 41	1	0.9989	0.9989	0.0268	1	0	1	0.998942612244898	0.998988244897959	0.0261798367346939	0.973154367346939	0.0477981224489796	1	0.000443190711999786	0.000438776826387494	0.00526656986503144	0.0241848423728632	0.0280526463759508
1538	12 vs. 41	2	0.9986	0.9986	0.0222	1	0.1667	2	0.997084244897959	0.997079102040816	0.0320324897959184	0.98314506122449	0.13334	2	0.00167378038871567	0.00167997748687571	0.00839505607048402	0.0172091595875419	0.019070642667847
1539	12 vs. 41	3	0.9806	0.9643	0.0612	0.8571	0.4167	3	0.978327836734694	0.963547755102041	0.0622181224489796	0.938534775510204	0.40110987755102	3	0.0162470837193968	0.0272804614226038	0.0217686779856555	0.0527818480087459	0.0383368411702942
1540	12 vs. 42	1	0.9995	0.9995	0.0232	1	0	1	0.998942612244898	0.998988244897959	0.0261798367346939	0.973154367346939	0.0477981224489796	1	0.000443190711999786	0.000438776826387494	0.00526656986503144	0.0241848423728632	0.0280526463759508
1541	12 vs. 42	2	0.9925	0.9921	0.0532	0.9677	0.1389	2	0.997084244897959	0.997079102040816	0.0320324897959184	0.98314506122449	0.13334	2	0.00167378038871567	0.00167997748687571	0.00839505607048402	0.0172091595875419	0.019070642667847
1542	12 vs. 42	3	0.9475	0.9066	0.1003	0.9474	0.4722	3	0.978327836734694	0.963547755102041	0.0622181224489796	0.938534775510204	0.40110987755102	3	0.0162470837193968	0.0272804614226038	0.0217686779856555	0.0527818480087459	0.0383368411702942
1543	12 vs. 43	1	0.9993	0.9993	0.0208	0.9714	0.0278	1	0.998942612244898	0.998988244897959	0.0261798367346939	0.973154367346939	0.0477981224489796	1	0.000443190711999786	0.000438776826387494	0.00526656986503144	0.0241848423728632	0.0280526463759508
1544	12 vs. 43	2	0.9989	0.999	0.021	0.9677	0.1389	2	0.997084244897959	0.997079102040816	0.0320324897959184	0.98314506122449	0.13334	2	0.00167378038871567	0.00167997748687571	0.00839505607048402	0.0172091595875419	0.019070642667847
1545	12 vs. 43	3	0.9917	0.9852	0.04	1	0.5	3	0.978327836734694	0.963547755102041	0.0622181224489796	0.938534775510204	0.40110987755102	3	0.0162470837193968	0.0272804614226038	0.0217686779856555	0.0527818480087459	0.0383368411702942
1546	12 vs. 44	1	0.9989	0.9989	0.0271	0.9714	0.0278	1	0.998942612244898	0.998988244897959	0.0261798367346939	0.973154367346939	0.0477981224489796	1	0.000443190711999786	0.000438776826387494	0.00526656986503144	0.0241848423728632	0.0280526463759508
1547	12 vs. 44	2	0.9983	0.9983	0.0241	0.9677	0.1389	2	0.997084244897959	0.997079102040816	0.0320324897959184	0.98314506122449	0.13334	2	0.00167378038871567	0.00167997748687571	0.00839505607048402	0.0172091595875419	0.019070642667847
1548	12 vs. 44	3	0.9231	0.863	0.1222	0.9	0.4444	3	0.978327836734694	0.963547755102041	0.0622181224489796	0.938534775510204	0.40110987755102	3	0.0162470837193968	0.0272804614226038	0.0217686779856555	0.0527818480087459	0.0383368411702942
1549	12 vs. 45	1	0.9992	0.9992	0.0232	0.9714	0.0278	1	0.998942612244898	0.998988244897959	0.0261798367346939	0.973154367346939	0.0477981224489796	1	0.000443190711999786	0.000438776826387494	0.00526656986503144	0.0241848423728632	0.0280526463759508
1550	12 vs. 45	2	0.9982	0.9981	0.0287	0.9677	0.1389	2	0.997084244897959	0.997079102040816	0.0320324897959184	0.98314506122449	0.13334	2	0.00167378038871567	0.00167997748687571	0.00839505607048402	0.0172091595875419	0.019070642667847
1551	12 vs. 45	3	0.9703	0.9438	0.0759	0.9	0.4444	3	0.978327836734694	0.963547755102041	0.0622181224489796	0.938534775510204	0.40110987755102	3	0.0162470837193968	0.0272804614226038	0.0217686779856555	0.0527818480087459	0.0383368411702942
1552	12 vs. 46	1	0.9994	0.9994	0.0202	0.9412	0.0556	1	0.998942612244898	0.998988244897959	0.0261798367346939	0.973154367346939	0.0477981224489796	1	0.000443190711999786	0.000438776826387494	0.00526656986503144	0.0241848423728632	0.0280526463759508
1553	12 vs. 46	2	0.9988	0.9988	0.021	1	0.1667	2	0.997084244897959	0.997079102040816	0.0320324897959184	0.98314506122449	0.13334	2	0.00167378038871567	0.00167997748687571	0.00839505607048402	0.0172091595875419	0.019070642667847
1554	12 vs. 46	3	0.9862	0.9742	0.0517	0.9474	0.4722	3	0.978327836734694	0.963547755102041	0.0622181224489796	0.938534775510204	0.40110987755102	3	0.0162470837193968	0.0272804614226038	0.0217686779856555	0.0527818480087459	0.0383368411702942
1555	12 vs. 47	1	0.999	0.999	0.0247	0.9714	0.0278	1	0.998942612244898	0.998988244897959	0.0261798367346939	0.973154367346939	0.0477981224489796	1	0.000443190711999786	0.000438776826387494	0.00526656986503144	0.0241848423728632	0.0280526463759508
1556	12 vs. 47	2	0.9992	0.9992	0.0169	1	0.1667	2	0.997084244897959	0.997079102040816	0.0320324897959184	0.98314506122449	0.13334	2	0.00167378038871567	0.00167997748687571	0.00839505607048402	0.0172091595875419	0.019070642667847
1557	12 vs. 47	3	0.9826	0.9681	0.0586	0.9	0.4444	3	0.978327836734694	0.963547755102041	0.0622181224489796	0.938534775510204	0.40110987755102	3	0.0162470837193968	0.0272804614226038	0.0217686779856555	0.0527818480087459	0.0383368411702942
1558	12 vs. 48	1	0.9989	0.9989	0.0269	0.9714	0.0278	1	0.998942612244898	0.998988244897959	0.0261798367346939	0.973154367346939	0.0477981224489796	1	0.000443190711999786	0.000438776826387494	0.00526656986503144	0.0241848423728632	0.0280526463759508
1559	12 vs. 48	2	0.9969	0.9969	0.0331	0.9677	0.1389	2	0.997084244897959	0.997079102040816	0.0320324897959184	0.98314506122449	0.13334	2	0.00167378038871567	0.00167997748687571	0.00839505607048402	0.0172091595875419	0.019070642667847
1560	12 vs. 48	3	0.9729	0.9516	0.0718	0.9	0.4444	3	0.978327836734694	0.963547755102041	0.0622181224489796	0.938534775510204	0.40110987755102	3	0.0162470837193968	0.0272804614226038	0.0217686779856555	0.0527818480087459	0.0383368411702942
1561	12 vs. 49	1	0.9992	0.9992	0.0227	1	0	1	0.998942612244898	0.998988244897959	0.0261798367346939	0.973154367346939	0.0477981224489796	1	0.000443190711999786	0.000438776826387494	0.00526656986503144	0.0241848423728632	0.0280526463759508
1562	12 vs. 49	2	0.9988	0.9987	0.0211	1	0.1667	2	0.997084244897959	0.997079102040816	0.0320324897959184	0.98314506122449	0.13334	2	0.00167378038871567	0.00167997748687571	0.00839505607048402	0.0172091595875419	0.019070642667847
1563	12 vs. 49	3	0.9462	0.9021	0.1049	0.9	0.4444	3	0.978327836734694	0.963547755102041	0.0622181224489796	0.938534775510204	0.40110987755102	3	0.0162470837193968	0.0272804614226038	0.0217686779856555	0.0527818480087459	0.0383368411702942
1564	12 vs. 50	1	0.9986	0.9988	0.0301	0.9091	0.0833	1	0.998942612244898	0.998988244897959	0.0261798367346939	0.973154367346939	0.0477981224489796	1	0.000443190711999786	0.000438776826387494	0.00526656986503144	0.0241848423728632	0.0280526463759508
1565	12 vs. 50	2	0.995	0.9948	0.0428	0.9677	0.1389	2	0.997084244897959	0.997079102040816	0.0320324897959184	0.98314506122449	0.13334	2	0.00167378038871567	0.00167997748687571	0.00839505607048402	0.0172091595875419	0.019070642667847
1566	12 vs. 50	3	0.9837	0.9691	0.0562	0.9474	0.4722	3	0.978327836734694	0.963547755102041	0.0622181224489796	0.938534775510204	0.40110987755102	3	0.0162470837193968	0.0272804614226038	0.0217686779856555	0.0527818480087459	0.0383368411702942
1567	13 vs. 14	1	0.9986	0.9986	0.0304	0.9714	0.0278	1	0.998942612244898	0.998988244897959	0.0261798367346939	0.973154367346939	0.0477981224489796	1	0.000443190711999786	0.000438776826387494	0.00526656986503144	0.0241848423728632	0.0280526463759508
1568	13 vs. 14	2	0.9984	0.9983	0.0248	1	0.1111	2	0.997084244897959	0.997079102040816	0.0320324897959184	0.98314506122449	0.13334	2	0.00167378038871567	0.00167997748687571	0.00839505607048402	0.0172091595875419	0.019070642667847
1569	13 vs. 14	3	0.9914	0.9852	0.0422	0.9091	0.3889	3	0.978327836734694	0.963547755102041	0.0622181224489796	0.938534775510204	0.40110987755102	3	0.0162470837193968	0.0272804614226038	0.0217686779856555	0.0527818480087459	0.0383368411702942
1570	13 vs. 15	1	0.9982	0.9982	0.0339	0.9412	0.0556	1	0.998942612244898	0.998988244897959	0.0261798367346939	0.973154367346939	0.0477981224489796	1	0.000443190711999786	0.000438776826387494	0.00526656986503144	0.0241848423728632	0.0280526463759508
1571	13 vs. 15	2	0.9976	0.9977	0.03	0.9677	0.1389	2	0.997084244897959	0.997079102040816	0.0320324897959184	0.98314506122449	0.13334	2	0.00167378038871567	0.00167997748687571	0.00839505607048402	0.0172091595875419	0.019070642667847
1572	13 vs. 15	3	0.9646	0.9403	0.0835	0.9524	0.4167	3	0.978327836734694	0.963547755102041	0.0622181224489796	0.938534775510204	0.40110987755102	3	0.0162470837193968	0.0272804614226038	0.0217686779856555	0.0527818480087459	0.0383368411702942
1573	13 vs. 16	1	0.999	0.999	0.0252	0.9412	0.0556	1	0.998942612244898	0.998988244897959	0.0261798367346939	0.973154367346939	0.0477981224489796	1	0.000443190711999786	0.000438776826387494	0.00526656986503144	0.0241848423728632	0.0280526463759508
1574	13 vs. 16	2	0.9982	0.9981	0.026	1	0.1111	2	0.997084244897959	0.997079102040816	0.0320324897959184	0.98314506122449	0.13334	2	0.00167378038871567	0.00167997748687571	0.00839505607048402	0.0172091595875419	0.019070642667847
1575	13 vs. 16	3	0.9909	0.9856	0.0429	0.9091	0.3889	3	0.978327836734694	0.963547755102041	0.0622181224489796	0.938534775510204	0.40110987755102	3	0.0162470837193968	0.0272804614226038	0.0217686779856555	0.0527818480087459	0.0383368411702942
1576	13 vs. 17	1	0.9983	0.9984	0.0328	0.9412	0.0556	1	0.998942612244898	0.998988244897959	0.0261798367346939	0.973154367346939	0.0477981224489796	1	0.000443190711999786	0.000438776826387494	0.00526656986503144	0.0241848423728632	0.0280526463759508
1577	13 vs. 17	2	0.9968	0.9968	0.0351	1	0.1111	2	0.997084244897959	0.997079102040816	0.0320324897959184	0.98314506122449	0.13334	2	0.00167378038871567	0.00167997748687571	0.00839505607048402	0.0172091595875419	0.019070642667847
1578	13 vs. 17	3	0.9676	0.9454	0.079	0.9524	0.4167	3	0.978327836734694	0.963547755102041	0.0622181224489796	0.938534775510204	0.40110987755102	3	0.0162470837193968	0.0272804614226038	0.0217686779856555	0.0527818480087459	0.0383368411702942
1579	13 vs. 18	1	0.9972	0.9973	0.0427	0.9412	0.0556	1	0.998942612244898	0.998988244897959	0.0261798367346939	0.973154367346939	0.0477981224489796	1	0.000443190711999786	0.000438776826387494	0.00526656986503144	0.0241848423728632	0.0280526463759508
1580	13 vs. 18	2	0.9949	0.9954	0.0447	0.9677	0.1389	2	0.997084244897959	0.997079102040816	0.0320324897959184	0.98314506122449	0.13334	2	0.00167378038871567	0.00167997748687571	0.00839505607048402	0.0172091595875419	0.019070642667847
1581	13 vs. 18	3	0.9811	0.9711	0.0631	0.9524	0.4167	3	0.978327836734694	0.963547755102041	0.0622181224489796	0.938534775510204	0.40110987755102	3	0.0162470837193968	0.0272804614226038	0.0217686779856555	0.0527818480087459	0.0383368411702942
1582	13 vs. 19	1	0.9973	0.9974	0.0414	0.9412	0.0556	1	0.998942612244898	0.998988244897959	0.0261798367346939	0.973154367346939	0.0477981224489796	1	0.000443190711999786	0.000438776826387494	0.00526656986503144	0.0241848423728632	0.0280526463759508
1583	13 vs. 19	2	0.9979	0.9978	0.0295	1	0.1111	2	0.997084244897959	0.997079102040816	0.0320324897959184	0.98314506122449	0.13334	2	0.00167378038871567	0.00167997748687571	0.00839505607048402	0.0172091595875419	0.019070642667847
1584	13 vs. 19	3	0.9766	0.9685	0.0715	0.8696	0.3611	3	0.978327836734694	0.963547755102041	0.0622181224489796	0.938534775510204	0.40110987755102	3	0.0162470837193968	0.0272804614226038	0.0217686779856555	0.0527818480087459	0.0383368411702942
1585	13 vs. 20	1	0.9978	0.998	0.0377	0.9714	0.0278	1	0.998942612244898	0.998988244897959	0.0261798367346939	0.973154367346939	0.0477981224489796	1	0.000443190711999786	0.000438776826387494	0.00526656986503144	0.0241848423728632	0.0280526463759508
1586	13 vs. 20	2	0.9984	0.9984	0.0275	1	0.1111	2	0.997084244897959	0.997079102040816	0.0320324897959184	0.98314506122449	0.13334	2	0.00167378038871567	0.00167997748687571	0.00839505607048402	0.0172091595875419	0.019070642667847
1587	13 vs. 20	3	0.9658	0.9429	0.0822	0.9091	0.3889	3	0.978327836734694	0.963547755102041	0.0622181224489796	0.938534775510204	0.40110987755102	3	0.0162470837193968	0.0272804614226038	0.0217686779856555	0.0527818480087459	0.0383368411702942
1588	13 vs. 21	1	0.9985	0.9985	0.0309	0.9714	0.0278	1	0.998942612244898	0.998988244897959	0.0261798367346939	0.973154367346939	0.0477981224489796	1	0.000443190711999786	0.000438776826387494	0.00526656986503144	0.0241848423728632	0.0280526463759508
1589	13 vs. 21	2	0.9984	0.9984	0.0295	1	0.1111	2	0.997084244897959	0.997079102040816	0.0320324897959184	0.98314506122449	0.13334	2	0.00167378038871567	0.00167997748687571	0.00839505607048402	0.0172091595875419	0.019070642667847
1590	13 vs. 21	3	0.968	0.9459	0.0814	0.9524	0.4167	3	0.978327836734694	0.963547755102041	0.0622181224489796	0.938534775510204	0.40110987755102	3	0.0162470837193968	0.0272804614226038	0.0217686779856555	0.0527818480087459	0.0383368411702942
1591	13 vs. 22	1	0.9973	0.9973	0.0419	0.9412	0.0556	1	0.998942612244898	0.998988244897959	0.0261798367346939	0.973154367346939	0.0477981224489796	1	0.000443190711999786	0.000438776826387494	0.00526656986503144	0.0241848423728632	0.0280526463759508
1592	13 vs. 22	2	0.998	0.998	0.027	1	0.1111	2	0.997084244897959	0.997079102040816	0.0320324897959184	0.98314506122449	0.13334	2	0.00167378038871567	0.00167997748687571	0.00839505607048402	0.0172091595875419	0.019070642667847
1593	13 vs. 22	3	0.9696	0.9473	0.0772	0.9524	0.4167	3	0.978327836734694	0.963547755102041	0.0622181224489796	0.938534775510204	0.40110987755102	3	0.0162470837193968	0.0272804614226038	0.0217686779856555	0.0527818480087459	0.0383368411702942
1594	13 vs. 23	1	0.9974	0.9974	0.041	0.9412	0.0556	1	0.998942612244898	0.998988244897959	0.0261798367346939	0.973154367346939	0.0477981224489796	1	0.000443190711999786	0.000438776826387494	0.00526656986503144	0.0241848423728632	0.0280526463759508
1595	13 vs. 23	2	0.9983	0.9982	0.0297	1	0.1111	2	0.997084244897959	0.997079102040816	0.0320324897959184	0.98314506122449	0.13334	2	0.00167378038871567	0.00167997748687571	0.00839505607048402	0.0172091595875419	0.019070642667847
1596	13 vs. 23	3	0.9754	0.9625	0.0698	0.9524	0.4167	3	0.978327836734694	0.963547755102041	0.0622181224489796	0.938534775510204	0.40110987755102	3	0.0162470837193968	0.0272804614226038	0.0217686779856555	0.0527818480087459	0.0383368411702942
1597	13 vs. 24	1	0.9989	0.9989	0.0264	0.9714	0.0278	1	0.998942612244898	0.998988244897959	0.0261798367346939	0.973154367346939	0.0477981224489796	1	0.000443190711999786	0.000438776826387494	0.00526656986503144	0.0241848423728632	0.0280526463759508
1598	13 vs. 24	2	0.9984	0.9983	0.0249	0.9677	0.1389	2	0.997084244897959	0.997079102040816	0.0320324897959184	0.98314506122449	0.13334	2	0.00167378038871567	0.00167997748687571	0.00839505607048402	0.0172091595875419	0.019070642667847
1599	13 vs. 24	3	0.9957	0.994	0.0283	0.9524	0.4167	3	0.978327836734694	0.963547755102041	0.0622181224489796	0.938534775510204	0.40110987755102	3	0.0162470837193968	0.0272804614226038	0.0217686779856555	0.0527818480087459	0.0383368411702942
1600	13 vs. 25	1	0.9981	0.9981	0.0359	0.9714	0.0278	1	0.998942612244898	0.998988244897959	0.0261798367346939	0.973154367346939	0.0477981224489796	1	0.000443190711999786	0.000438776826387494	0.00526656986503144	0.0241848423728632	0.0280526463759508
1601	13 vs. 25	2	0.9987	0.9988	0.0238	0.9677	0.1389	2	0.997084244897959	0.997079102040816	0.0320324897959184	0.98314506122449	0.13334	2	0.00167378038871567	0.00167997748687571	0.00839505607048402	0.0172091595875419	0.019070642667847
1602	13 vs. 25	3	0.9745	0.9579	0.0749	0.9524	0.4167	3	0.978327836734694	0.963547755102041	0.0622181224489796	0.938534775510204	0.40110987755102	3	0.0162470837193968	0.0272804614226038	0.0217686779856555	0.0527818480087459	0.0383368411702942
1603	13 vs. 26	1	0.9993	0.9993	0.0233	0.9714	0.0278	1	0.998942612244898	0.998988244897959	0.0261798367346939	0.973154367346939	0.0477981224489796	1	0.000443190711999786	0.000438776826387494	0.00526656986503144	0.0241848423728632	0.0280526463759508
1604	13 vs. 26	2	0.9983	0.9982	0.0249	0.9677	0.1389	2	0.997084244897959	0.997079102040816	0.0320324897959184	0.98314506122449	0.13334	2	0.00167378038871567	0.00167997748687571	0.00839505607048402	0.0172091595875419	0.019070642667847
1605	13 vs. 26	3	0.981	0.9691	0.0649	0.9524	0.4167	3	0.978327836734694	0.963547755102041	0.0622181224489796	0.938534775510204	0.40110987755102	3	0.0162470837193968	0.0272804614226038	0.0217686779856555	0.0527818480087459	0.0383368411702942
1606	13 vs. 27	1	0.9983	0.9982	0.0337	0.9091	0.0833	1	0.998942612244898	0.998988244897959	0.0261798367346939	0.973154367346939	0.0477981224489796	1	0.000443190711999786	0.000438776826387494	0.00526656986503144	0.0241848423728632	0.0280526463759508
1607	13 vs. 27	2	0.9977	0.9978	0.0294	1	0.1111	2	0.997084244897959	0.997079102040816	0.0320324897959184	0.98314506122449	0.13334	2	0.00167378038871567	0.00167997748687571	0.00839505607048402	0.0172091595875419	0.019070642667847
1608	13 vs. 27	3	0.9874	0.9806	0.0487	0.8421	0.4722	3	0.978327836734694	0.963547755102041	0.0622181224489796	0.938534775510204	0.40110987755102	3	0.0162470837193968	0.0272804614226038	0.0217686779856555	0.0527818480087459	0.0383368411702942
1609	13 vs. 28	1	0.9985	0.9986	0.0305	0.9714	0.0278	1	0.998942612244898	0.998988244897959	0.0261798367346939	0.973154367346939	0.0477981224489796	1	0.000443190711999786	0.000438776826387494	0.00526656986503144	0.0241848423728632	0.0280526463759508
1610	13 vs. 28	2	0.9967	0.9968	0.0356	1	0.1111	2	0.997084244897959	0.997079102040816	0.0320324897959184	0.98314506122449	0.13334	2	0.00167378038871567	0.00167997748687571	0.00839505607048402	0.0172091595875419	0.019070642667847
1611	13 vs. 28	3	0.9793	0.966	0.0625	0.9	0.4444	3	0.978327836734694	0.963547755102041	0.0622181224489796	0.938534775510204	0.40110987755102	3	0.0162470837193968	0.0272804614226038	0.0217686779856555	0.0527818480087459	0.0383368411702942
1612	13 vs. 29	1	0.9979	0.998	0.0369	0.9412	0.0556	1	0.998942612244898	0.998988244897959	0.0261798367346939	0.973154367346939	0.0477981224489796	1	0.000443190711999786	0.000438776826387494	0.00526656986503144	0.0241848423728632	0.0280526463759508
1613	13 vs. 29	2	0.9984	0.9984	0.025	1	0.1111	2	0.997084244897959	0.997079102040816	0.0320324897959184	0.98314506122449	0.13334	2	0.00167378038871567	0.00167997748687571	0.00839505607048402	0.0172091595875419	0.019070642667847
1614	13 vs. 29	3	0.9638	0.9392	0.0825	0.9524	0.4167	3	0.978327836734694	0.963547755102041	0.0622181224489796	0.938534775510204	0.40110987755102	3	0.0162470837193968	0.0272804614226038	0.0217686779856555	0.0527818480087459	0.0383368411702942
1615	13 vs. 30	1	0.9988	0.9988	0.0272	0.9714	0.0278	1	0.998942612244898	0.998988244897959	0.0261798367346939	0.973154367346939	0.0477981224489796	1	0.000443190711999786	0.000438776826387494	0.00526656986503144	0.0241848423728632	0.0280526463759508
1616	13 vs. 30	2	0.9982	0.9981	0.0292	0.9677	0.1389	2	0.997084244897959	0.997079102040816	0.0320324897959184	0.98314506122449	0.13334	2	0.00167378038871567	0.00167997748687571	0.00839505607048402	0.0172091595875419	0.019070642667847
1617	13 vs. 30	3	0.9881	0.9824	0.0476	0.9474	0.4722	3	0.978327836734694	0.963547755102041	0.0622181224489796	0.938534775510204	0.40110987755102	3	0.0162470837193968	0.0272804614226038	0.0217686779856555	0.0527818480087459	0.0383368411702942
1618	13 vs. 31	1	0.999	0.999	0.0257	1	0.0556	1	0.998942612244898	0.998988244897959	0.0261798367346939	0.973154367346939	0.0477981224489796	1	0.000443190711999786	0.000438776826387494	0.00526656986503144	0.0241848423728632	0.0280526463759508
1619	13 vs. 31	2	0.998	0.998	0.0308	1	0.1111	2	0.997084244897959	0.997079102040816	0.0320324897959184	0.98314506122449	0.13334	2	0.00167378038871567	0.00167997748687571	0.00839505607048402	0.0172091595875419	0.019070642667847
1620	13 vs. 31	3	0.9875	0.9787	0.0489	1	0.4444	3	0.978327836734694	0.963547755102041	0.0622181224489796	0.938534775510204	0.40110987755102	3	0.0162470837193968	0.0272804614226038	0.0217686779856555	0.0527818480087459	0.0383368411702942
1621	13 vs. 32	1	0.9988	0.9988	0.0288	0.9412	0.0556	1	0.998942612244898	0.998988244897959	0.0261798367346939	0.973154367346939	0.0477981224489796	1	0.000443190711999786	0.000438776826387494	0.00526656986503144	0.0241848423728632	0.0280526463759508
1622	13 vs. 32	2	0.9967	0.9966	0.0354	1	0.1111	2	0.997084244897959	0.997079102040816	0.0320324897959184	0.98314506122449	0.13334	2	0.00167378038871567	0.00167997748687571	0.00839505607048402	0.0172091595875419	0.019070642667847
1623	13 vs. 32	3	0.9936	0.989	0.0362	0.9091	0.3889	3	0.978327836734694	0.963547755102041	0.0622181224489796	0.938534775510204	0.40110987755102	3	0.0162470837193968	0.0272804614226038	0.0217686779856555	0.0527818480087459	0.0383368411702942
1624	13 vs. 33	1	0.9992	0.9992	0.0228	0.9375	0.1111	1	0.998942612244898	0.998988244897959	0.0261798367346939	0.973154367346939	0.0477981224489796	1	0.000443190711999786	0.000438776826387494	0.00526656986503144	0.0241848423728632	0.0280526463759508
1625	13 vs. 33	2	0.9965	0.9963	0.0365	0.9677	0.1389	2	0.997084244897959	0.997079102040816	0.0320324897959184	0.98314506122449	0.13334	2	0.00167378038871567	0.00167997748687571	0.00839505607048402	0.0172091595875419	0.019070642667847
1626	13 vs. 33	3	0.9912	0.9894	0.0414	0.9474	0.4722	3	0.978327836734694	0.963547755102041	0.0622181224489796	0.938534775510204	0.40110987755102	3	0.0162470837193968	0.0272804614226038	0.0217686779856555	0.0527818480087459	0.0383368411702942
1627	13 vs. 34	1	0.998	0.998	0.036	0.9412	0.0556	1	0.998942612244898	0.998988244897959	0.0261798367346939	0.973154367346939	0.0477981224489796	1	0.000443190711999786	0.000438776826387494	0.00526656986503144	0.0241848423728632	0.0280526463759508
1628	13 vs. 34	2	0.9977	0.9976	0.0296	1	0.1111	2	0.997084244897959	0.997079102040816	0.0320324897959184	0.98314506122449	0.13334	2	0.00167378038871567	0.00167997748687571	0.00839505607048402	0.0172091595875419	0.019070642667847
1629	13 vs. 34	3	0.984	0.9728	0.0557	0.9524	0.4167	3	0.978327836734694	0.963547755102041	0.0622181224489796	0.938534775510204	0.40110987755102	3	0.0162470837193968	0.0272804614226038	0.0217686779856555	0.0527818480087459	0.0383368411702942
1630	13 vs. 35	1	0.9984	0.9984	0.0333	0.9412	0.0556	1	0.998942612244898	0.998988244897959	0.0261798367346939	0.973154367346939	0.0477981224489796	1	0.000443190711999786	0.000438776826387494	0.00526656986503144	0.0241848423728632	0.0280526463759508
1631	13 vs. 35	2	0.9967	0.9966	0.0349	0.9677	0.1389	2	0.997084244897959	0.997079102040816	0.0320324897959184	0.98314506122449	0.13334	2	0.00167378038871567	0.00167997748687571	0.00839505607048402	0.0172091595875419	0.019070642667847
1632	13 vs. 35	3	0.9831	0.9709	0.0569	0.9524	0.4167	3	0.978327836734694	0.963547755102041	0.0622181224489796	0.938534775510204	0.40110987755102	3	0.0162470837193968	0.0272804614226038	0.0217686779856555	0.0527818480087459	0.0383368411702942
1633	13 vs. 36	1	0.9988	0.9989	0.0274	0.9412	0.0556	1	0.998942612244898	0.998988244897959	0.0261798367346939	0.973154367346939	0.0477981224489796	1	0.000443190711999786	0.000438776826387494	0.00526656986503144	0.0241848423728632	0.0280526463759508
1634	13 vs. 36	2	0.9967	0.9966	0.0348	1	0.1111	2	0.997084244897959	0.997079102040816	0.0320324897959184	0.98314506122449	0.13334	2	0.00167378038871567	0.00167997748687571	0.00839505607048402	0.0172091595875419	0.019070642667847
1635	13 vs. 36	3	0.9935	0.989	0.0347	0.9091	0.3889	3	0.978327836734694	0.963547755102041	0.0622181224489796	0.938534775510204	0.40110987755102	3	0.0162470837193968	0.0272804614226038	0.0217686779856555	0.0527818480087459	0.0383368411702942
1636	13 vs. 37	1	0.998	0.998	0.036	0.9091	0.0833	1	0.998942612244898	0.998988244897959	0.0261798367346939	0.973154367346939	0.0477981224489796	1	0.000443190711999786	0.000438776826387494	0.00526656986503144	0.0241848423728632	0.0280526463759508
1637	13 vs. 37	2	0.9982	0.9981	0.0273	0.9677	0.1389	2	0.997084244897959	0.997079102040816	0.0320324897959184	0.98314506122449	0.13334	2	0.00167378038871567	0.00167997748687571	0.00839505607048402	0.0172091595875419	0.019070642667847
1638	13 vs. 37	3	0.99	0.9857	0.0445	1	0.4444	3	0.978327836734694	0.963547755102041	0.0622181224489796	0.938534775510204	0.40110987755102	3	0.0162470837193968	0.0272804614226038	0.0217686779856555	0.0527818480087459	0.0383368411702942
1639	13 vs. 38	1	0.9984	0.9984	0.0341	0.9412	0.0556	1	0.998942612244898	0.998988244897959	0.0261798367346939	0.973154367346939	0.0477981224489796	1	0.000443190711999786	0.000438776826387494	0.00526656986503144	0.0241848423728632	0.0280526463759508
1640	13 vs. 38	2	0.9986	0.9986	0.0246	1	0.1111	2	0.997084244897959	0.997079102040816	0.0320324897959184	0.98314506122449	0.13334	2	0.00167378038871567	0.00167997748687571	0.00839505607048402	0.0172091595875419	0.019070642667847
1641	13 vs. 38	3	0.9932	0.9892	0.0363	0.9474	0.4722	3	0.978327836734694	0.963547755102041	0.0622181224489796	0.938534775510204	0.40110987755102	3	0.0162470837193968	0.0272804614226038	0.0217686779856555	0.0527818480087459	0.0383368411702942
1642	13 vs. 39	1	0.9991	0.9992	0.0249	0.9412	0.0556	1	0.998942612244898	0.998988244897959	0.0261798367346939	0.973154367346939	0.0477981224489796	1	0.000443190711999786	0.000438776826387494	0.00526656986503144	0.0241848423728632	0.0280526463759508
1643	13 vs. 39	2	0.9986	0.9986	0.0234	0.9677	0.1389	2	0.997084244897959	0.997079102040816	0.0320324897959184	0.98314506122449	0.13334	2	0.00167378038871567	0.00167997748687571	0.00839505607048402	0.0172091595875419	0.019070642667847
1644	13 vs. 39	3	0.9917	0.9864	0.0404	0.9524	0.4167	3	0.978327836734694	0.963547755102041	0.0622181224489796	0.938534775510204	0.40110987755102	3	0.0162470837193968	0.0272804614226038	0.0217686779856555	0.0527818480087459	0.0383368411702942
1645	13 vs. 40	1	0.9977	0.9977	0.0385	0.9412	0.0556	1	0.998942612244898	0.998988244897959	0.0261798367346939	0.973154367346939	0.0477981224489796	1	0.000443190711999786	0.000438776826387494	0.00526656986503144	0.0241848423728632	0.0280526463759508
1646	13 vs. 40	2	0.9983	0.9982	0.0253	1	0.1111	2	0.997084244897959	0.997079102040816	0.0320324897959184	0.98314506122449	0.13334	2	0.00167378038871567	0.00167997748687571	0.00839505607048402	0.0172091595875419	0.019070642667847
1647	13 vs. 40	3	0.9899	0.983	0.0451	0.9474	0.4722	3	0.978327836734694	0.963547755102041	0.0622181224489796	0.938534775510204	0.40110987755102	3	0.0162470837193968	0.0272804614226038	0.0217686779856555	0.0527818480087459	0.0383368411702942
1648	13 vs. 41	1	0.9989	0.9989	0.0268	0.9714	0.0278	1	0.998942612244898	0.998988244897959	0.0261798367346939	0.973154367346939	0.0477981224489796	1	0.000443190711999786	0.000438776826387494	0.00526656986503144	0.0241848423728632	0.0280526463759508
1649	13 vs. 41	2	0.9974	0.9973	0.0331	0.9677	0.1389	2	0.997084244897959	0.997079102040816	0.0320324897959184	0.98314506122449	0.13334	2	0.00167378038871567	0.00167997748687571	0.00839505607048402	0.0172091595875419	0.019070642667847
1650	13 vs. 41	3	0.996	0.9941	0.0284	0.9091	0.3889	3	0.978327836734694	0.963547755102041	0.0622181224489796	0.938534775510204	0.40110987755102	3	0.0162470837193968	0.0272804614226038	0.0217686779856555	0.0527818480087459	0.0383368411702942
1651	13 vs. 42	1	0.9985	0.9985	0.034	0.9714	0.0278	1	0.998942612244898	0.998988244897959	0.0261798367346939	0.973154367346939	0.0477981224489796	1	0.000443190711999786	0.000438776826387494	0.00526656986503144	0.0241848423728632	0.0280526463759508
1652	13 vs. 42	2	0.9947	0.9945	0.0442	1	0.1111	2	0.997084244897959	0.997079102040816	0.0320324897959184	0.98314506122449	0.13334	2	0.00167378038871567	0.00167997748687571	0.00839505607048402	0.0172091595875419	0.019070642667847
1653	13 vs. 42	3	0.9749	0.9567	0.0695	1	0.4444	3	0.978327836734694	0.963547755102041	0.0622181224489796	0.938534775510204	0.40110987755102	3	0.0162470837193968	0.0272804614226038	0.0217686779856555	0.0527818480087459	0.0383368411702942
1654	13 vs. 43	1	0.9986	0.9986	0.0304	0.9412	0.0556	1	0.998942612244898	0.998988244897959	0.0261798367346939	0.973154367346939	0.0477981224489796	1	0.000443190711999786	0.000438776826387494	0.00526656986503144	0.0241848423728632	0.0280526463759508
1655	13 vs. 43	2	0.998	0.998	0.0271	1	0.1111	2	0.997084244897959	0.997079102040816	0.0320324897959184	0.98314506122449	0.13334	2	0.00167378038871567	0.00167997748687571	0.00839505607048402	0.0172091595875419	0.019070642667847
1656	13 vs. 43	3	0.9868	0.9829	0.0504	0.9474	0.4722	3	0.978327836734694	0.963547755102041	0.0622181224489796	0.938534775510204	0.40110987755102	3	0.0162470837193968	0.0272804614226038	0.0217686779856555	0.0527818480087459	0.0383368411702942
1657	13 vs. 44	1	0.9982	0.9982	0.0343	0.9412	0.0556	1	0.998942612244898	0.998988244897959	0.0261798367346939	0.973154367346939	0.0477981224489796	1	0.000443190711999786	0.000438776826387494	0.00526656986503144	0.0241848423728632	0.0280526463759508
1658	13 vs. 44	2	0.9973	0.9971	0.0335	1	0.1111	2	0.997084244897959	0.997079102040816	0.0320324897959184	0.98314506122449	0.13334	2	0.00167378038871567	0.00167997748687571	0.00839505607048402	0.0172091595875419	0.019070642667847
1659	13 vs. 44	3	0.9602	0.9314	0.0881	0.9524	0.4167	3	0.978327836734694	0.963547755102041	0.0622181224489796	0.938534775510204	0.40110987755102	3	0.0162470837193968	0.0272804614226038	0.0217686779856555	0.0527818480087459	0.0383368411702942
1660	13 vs. 45	1	0.9984	0.9984	0.0321	0.9412	0.0556	1	0.998942612244898	0.998988244897959	0.0261798367346939	0.973154367346939	0.0477981224489796	1	0.000443190711999786	0.000438776826387494	0.00526656986503144	0.0241848423728632	0.0280526463759508
1661	13 vs. 45	2	0.9978	0.9977	0.0288	1	0.1111	2	0.997084244897959	0.997079102040816	0.0320324897959184	0.98314506122449	0.13334	2	0.00167378038871567	0.00167997748687571	0.00839505607048402	0.0172091595875419	0.019070642667847
1662	13 vs. 45	3	0.9866	0.9791	0.0513	0.9524	0.4167	3	0.978327836734694	0.963547755102041	0.0622181224489796	0.938534775510204	0.40110987755102	3	0.0162470837193968	0.0272804614226038	0.0217686779856555	0.0527818480087459	0.0383368411702942
1663	13 vs. 46	1	0.9983	0.9983	0.033	0.9091	0.0833	1	0.998942612244898	0.998988244897959	0.0261798367346939	0.973154367346939	0.0477981224489796	1	0.000443190711999786	0.000438776826387494	0.00526656986503144	0.0241848423728632	0.0280526463759508
1664	13 vs. 46	2	0.9981	0.9981	0.0271	0.9677	0.1389	2	0.997084244897959	0.997079102040816	0.0320324897959184	0.98314506122449	0.13334	2	0.00167378038871567	0.00167997748687571	0.00839505607048402	0.0172091595875419	0.019070642667847
1665	13 vs. 46	3	0.9915	0.9868	0.041	1	0.4444	3	0.978327836734694	0.963547755102041	0.0622181224489796	0.938534775510204	0.40110987755102	3	0.0162470837193968	0.0272804614226038	0.0217686779856555	0.0527818480087459	0.0383368411702942
1666	13 vs. 47	1	0.9983	0.9983	0.0334	0.9412	0.0556	1	0.998942612244898	0.998988244897959	0.0261798367346939	0.973154367346939	0.0477981224489796	1	0.000443190711999786	0.000438776826387494	0.00526656986503144	0.0241848423728632	0.0280526463759508
1667	13 vs. 47	2	0.999	0.9989	0.0208	0.9677	0.1389	2	0.997084244897959	0.997079102040816	0.0320324897959184	0.98314506122449	0.13334	2	0.00167378038871567	0.00167997748687571	0.00839505607048402	0.0172091595875419	0.019070642667847
1668	13 vs. 47	3	0.9924	0.9876	0.0395	0.9524	0.4167	3	0.978327836734694	0.963547755102041	0.0622181224489796	0.938534775510204	0.40110987755102	3	0.0162470837193968	0.0272804614226038	0.0217686779856555	0.0527818480087459	0.0383368411702942
1669	13 vs. 48	1	0.9988	0.9987	0.0282	0.9412	0.0556	1	0.998942612244898	0.998988244897959	0.0261798367346939	0.973154367346939	0.0477981224489796	1	0.000443190711999786	0.000438776826387494	0.00526656986503144	0.0241848423728632	0.0280526463759508
1670	13 vs. 48	2	0.9981	0.998	0.0317	1	0.1111	2	0.997084244897959	0.997079102040816	0.0320324897959184	0.98314506122449	0.13334	2	0.00167378038871567	0.00167997748687571	0.00839505607048402	0.0172091595875419	0.019070642667847
[truncated: 2,005 more rows]
