# Supplementary material for: Reproducible analysis of disease space via principal components using the novel R package syndRomics
Source: eLife. 2021 Jan 14;10:e61812. doi: 10.7554/eLife.61812 (PMC7857733; doi:10.7554/eLife.61812)
Supplement: Figure 3—source data 1. [file elife-61812-fig3-data1.csv]

	original	mean	ci_low	ci_high	pvalue	adj.p.value
PC1	0.329138389432969	0.0911465880784709	0.0842119363400125	0.100197457805136	0.000333222259246918	0.000555370432078196
PC2	0.183118857539989	0.083815942892553	0.0783932359387814	0.0898136222572735	0.000333222259246918	0.000555370432078196
PC3	0.0987614635024133	0.0782935174093814	0.0737471610881481	0.083417421579645	0.000333222259246918	0.000555370432078196
PC4	0.0752347566795173	0.0735573103946327	0.0694415241493518	0.0778506576441987	0.215594801732756	0.269493502165945
PC5	0.0625361829701187	0.0693453372962464	0.0655823561133091	0.0732898218852545	1	1
