# Supplementary material for: Reproducible analysis of disease space via principal components using the novel R package syndRomics
Source: eLife. 2021 Jan 14;10:e61812. doi: 10.7554/eLife.61812 (PMC7857733; doi:10.7554/eLife.61812)
Supplement: Figure 3—source data 2. [file elife-61812-fig3-data2.csv]

	Variables	original	mean	ci_low	ci_high	pvalue	adj.p.value
1	BBB_FergTrans	0.659845037490228	0.0561040822871478	0.0038990395339013	0.177537566486204	0.000333222259246918	0.000333222259246918
2	ForelimbOpenField	0.365550202236796	0.0533012364756316	0.00369954160174006	0.167289204562308	0.000333222259246918	0.000333222259246918
3	Groom	0.530317569811504	0.0550860686160368	0.00370306227341242	0.170058978838981	0.000333222259246918	0.000333222259246918
4	LFPA	0.613499689258755	0.0609668892881821	0.00372908100487085	0.196344297689704	0.000333222259246918	0.000333222259246918
5	LFSL	0.56799956461556	0.0549078387332661	0.00345392754319763	0.175268836119966	0.000333222259246918	0.000333222259246918
6	LHPA	0.785044063421308	0.0699298057616155	0.00415905870049448	0.225892003168615	0.000333222259246918	0.000333222259246918
7	LHSL	0.791010245156368	0.0610041513861557	0.00407348909794381	0.19891534458088	0.000333222259246918	0.000333222259246918
8	PawPL	0.701651988418298	0.0565908647649156	0.00364678916203779	0.180928090629064	0.000333222259246918	0.000333222259246918
9	RFPA	0.853412413571475	0.0568828816069493	0.00351990692690735	0.187790141639024	0.000333222259246918	0.000333222259246918
10	RFSL	0.59123248934326	0.0554117575241114	0.00389556663475263	0.179716538668846	0.000333222259246918	0.000333222259246918
11	RHPA	0.807645299167462	0.0590084859003045	0.00463922609570285	0.184379396582115	0.000333222259246918	0.000333222259246918
12	RHSL	0.88206198460054	0.0581428933248214	0.00394226323500281	0.18604849477928	0.000333222259246918	0.000333222259246918
13	StepDistLF	0.710449648693743	0.0541273399003947	0.00399612762248672	0.173014326749666	0.000333222259246918	0.000333222259246918
14	StepDistLH	0.460479146486993	0.0654143892191068	0.00423499898475494	0.203377560002086	0.000333222259246918	0.000333222259246918
15	StepDistRF	0.535636361056033	0.0541339375114354	0.00387839771815337	0.172607575090977	0.000333222259246918	0.000333222259246918
16	StepDistRH	0.274290864215182	0.0558169268891263	0.00386230708262517	0.173215842963651	0.000333222259246918	0.000333222259246918
17	TotalSubscore	0.40456335842269	0.0548983205855849	0.00338209342830448	0.177962030411368	0.000333222259246918	0.000333222259246918
18	wtChng	0.463646862590497	0.0620426610329551	0.00369989947144446	0.199869374415408	0.000333222259246918	0.000333222259246918
