# Supplementary material for: Reproducible analysis of disease space via principal components using the novel R package syndRomics
Source: eLife. 2021 Jan 14;10:e61812. doi: 10.7554/eLife.61812 (PMC7857733; doi:10.7554/eLife.61812)
Supplement: Figure 3—source data 3. [file elife-61812-fig3-data3.csv]

	Variables	component	original	mean	ci_low	ci_high	pvalue	adj.p.value
1	BBB_FergTrans	PC1	0.491768111534921	0.00454981868644275	-0.178789680267	0.194267060608301	0.000333222259246918	0.000428428619031751
2	BBB_FergTrans	PC2	-0.645604848100738	-0.00790183352540099	-0.236497450705363	0.22753786397248	0.000333222259246918	0.000749750083305565
3	BBB_FergTrans	PC3	0.0346921039492906	0.00116360716117105	-0.34055719687984	0.34432754234328	0.857047650783072	0.907462218476194
4	ForelimbOpenField	PC1	0.512878726181164	0.00286752429884996	-0.17615028007478	0.187681226819237	0.000333222259246918	0.000428428619031751
5	ForelimbOpenField	PC2	-0.320135433302279	-0.000888831551876819	-0.220500074664016	0.225338559142553	0.00399866711096301	0.00654327345430311
6	ForelimbOpenField	PC3	0.00434957606485433	0.0015098241491173	-0.347120502518649	0.322337618545251	0.980006664445185	0.980006664445185
7	Groom	PC1	0.376708589633417	0.00495836748520581	-0.178290489353721	0.190093314256965	0.000333222259246918	0.000428428619031751
8	Groom	PC2	-0.621087887997601	-0.00442352155171758	-0.227830454706546	0.221211275022237	0.000333222259246918	0.000749750083305565
9	Groom	PC3	-0.0515562187382455	0.00289154137596672	-0.342058240978189	0.33962288233328	0.789403532155948	0.888078973675442
10	LFPA	PC1	0.538733147625741	0.00304988585591156	-0.189210039704732	0.182965493562586	0.000333222259246918	0.000428428619031751
11	LFPA	PC2	0.265837802651698	0.004028149614983	-0.218971489986027	0.219027822969675	0.015994668443852	0.0191936021326225
12	LFPA	PC3	0.502589840316468	-0.000344199150486697	-0.362434980497152	0.386601732765432	0.00433188937020993	0.0389870043318894
13	LFSL	PC1	-0.278438792257268	-0.00121907458331029	-0.178276947984298	0.182752559456002	0.00233255581472842	0.00279906697767411
14	LFSL	PC2	-0.66255390238155	-0.00352915236008819	-0.23166819737231	0.230378607895622	0.000333222259246918	0.000749750083305565
15	LFSL	PC3	0.226922299523103	-0.00837381023832787	-0.351128269742753	0.348657305427123	0.222592469176941	0.400666444518494
16	LHPA	PC1	0.616420265707612	0.00333210919972031	-0.191631494906453	0.185416870656888	0.000333222259246918	0.000428428619031751
17	LHPA	PC2	0.422526468700293	0.00172064337018207	-0.234719184054157	0.224763096381042	0.000333222259246918	0.000749750083305565
18	LHPA	PC3	0.475963761954547	0.00272836241522696	-0.40007825970836	0.421299596992146	0.0176607797400866	0.0635788070643119
19	LHSL	PC1	-0.759573441111725	-0.00765284709266203	-0.195028664900287	0.176004881757718	0.000333222259246918	0.000428428619031751
20	LHSL	PC2	-0.300549711142951	-0.000155900152675713	-0.223887458310326	0.220023219232823	0.00766411196267911	0.0106118473329403
21	LHSL	PC3	0.351750343064438	-0.00236516419883631	-0.371088800786781	0.368697288868275	0.0663112295901366	0.19893368877041
22	PawPL	PC1	-0.538611661776752	-0.00815862855408899	-0.197620760968046	0.17782799485402	0.000333222259246918	0.000428428619031751
23	PawPL	PC2	0.63027061012842	0.00450641038565814	-0.231851581604365	0.236583201818535	0.000333222259246918	0.000749750083305565
24	PawPL	PC3	-0.119617825698069	0.00241949873678788	-0.33745666292575	0.340413254023279	0.545151616127957	0.654181939353549
25	RFPA	PC1	0.891165363566118	0.00703514791412743	-0.174631250118163	0.193077417011849	0.000333222259246918	0.000428428619031751
26	RFPA	PC2	-0.0748936587904629	-0.0018337788775133	-0.220228037463709	0.219818273738151	0.512162612462512	0.512162612462512
27	RFPA	PC3	0.23157644142814	0.00255629442012406	-0.345989887587466	0.359112966093852	0.217927357547484	0.400666444518494
28	RFSL	PC1	-0.561008847919989	-0.00179468124871024	-0.186818546809303	0.17416212762557	0.000333222259246918	0.000428428619031751
29	RFSL	PC2	-0.479695987006613	-0.00374477225511508	-0.226756247599782	0.215603022322258	0.000333222259246918	0.000749750083305565
30	RFSL	PC3	0.215391090689699	-0.000217636006042991	-0.340836333666297	0.378008780449852	0.245918027324225	0.402411317439641
31	RHPA	PC1	0.739911604487928	0.00841653892972952	-0.180798212030336	0.190489474867724	0.000333222259246918	0.000428428619031751
32	RHPA	PC2	0.396411253845078	0.00561439624037386	-0.213955604786525	0.239196202632684	0.000333222259246918	0.000749750083305565
33	RHPA	PC3	0.32098946172193	-0.0024428914199014	-0.359991356085457	0.374465283528071	0.0939686771076308	0.241633741133908
34	RHSL	PC1	-0.852168232325672	-0.00579952282370987	-0.18897093669664	0.187574922458387	0.000333222259246918	0.000428428619031751
35	RHSL	PC2	-0.299436224284263	-0.000496848787975088	-0.218257701729682	0.222383372072145	0.00633122292569144	0.00949683438853715
36	RHSL	PC3	0.25731155434971	-0.00328125763097946	-0.356217904558343	0.365370106948573	0.184605131622792	0.400666444518494
37	StepDistLF	PC1	-0.764539394668188	-0.00645968393242259	-0.204894399049765	0.180298606040188	0.000333222259246918	0.000428428619031751
38	StepDistLF	PC2	0.335304751043028	0.00614976411721896	-0.214024072436695	0.23005791732209	0.00299900033322226	0.00539820059980007
39	StepDistLF	PC3	0.116189012484469	0.00385019853490479	-0.323666700027466	0.343165887875969	0.537154281906031	0.654181939353549
40	StepDistLH	PC1	-0.237365245730515	0.00102476246775272	-0.184688445893211	0.180239062783077	0.0103298900366544	0.0116211262912363
41	StepDistLH	PC2	0.118110234679886	-0.00285616216781329	-0.226920755856913	0.217785183321781	0.323558813728757	0.342591685124566
42	StepDistLH	PC3	0.624649388913611	0.00516862483631651	-0.372638965884227	0.395251860215914	0.000333222259246918	0.00599800066644452
43	StepDistRF	PC1	-0.648668770684716	-0.00594668299712886	-0.198592990038215	0.183367623007277	0.000333222259246918	0.000428428619031751
44	StepDistRF	PC2	0.282817308347294	-0.00107796605333282	-0.221884773315791	0.211561278779217	0.0143285571476175	0.0184224306183653
45	StepDistRF	PC3	-0.186760694723498	-0.00237020399735862	-0.342363309140507	0.337858965199076	0.313895368210596	0.470843052315895
46	StepDistRH	PC1	-0.246315643408719	-0.000243156109008746	-0.189923480168278	0.182452786036247	0.0109963345551483	0.0116431777642747
47	StepDistRH	PC2	0.213738851393137	0.000818149228308155	-0.221839789389694	0.218452034540538	0.0583138953682106	0.0656031322892369
48	StepDistRH	PC3	0.40979894025299	0.00807836793857327	-0.330539080463819	0.362755290244682	0.0156614461846051	0.0635788070643119
49	TotalSubscore	PC1	0.200303208438252	0.00257270114375111	-0.18379452851033	0.181864081041377	0.0333222259246918	0.0333222259246918
50	TotalSubscore	PC2	-0.58811866690508	-0.00356999402262365	-0.222484652781624	0.236122968880722	0.000333222259246918	0.000749750083305565
51	TotalSubscore	PC3	-0.136229280075261	-0.0041810309378675	-0.350181936248734	0.327139072421559	0.459180273242253	0.635788070643119
52	wtChng	PC1	-0.343392105687477	-0.000300858427155562	-0.179747162877977	0.18523439591846	0.000333222259246918	0.000428428619031751
53	wtChng	PC2	-0.367281534972708	-0.00255748313078639	-0.225568149743482	0.219617410064158	0.000999666777740753	0.00199933355548151
54	wtChng	PC3	0.459165545756766	-0.000465897243756987	-0.391477719859176	0.382718918627528	0.0149950016661113	0.0635788070643119
