# Supplementary material for: Reproducible analysis of disease space via principal components using the novel R package syndRomics
Source: eLife. 2021 Jan 14;10:e61812. doi: 10.7554/eLife.61812 (PMC7857733; doi:10.7554/eLife.61812)
Supplement: Figure 7—figure supplement 1—source data 1. [file elife-61812-fig7-figsupp1-data1.csv]

	index_all.Comparison	index_all.PC	index_all.cc_index	index_all.r_correlation	index_all.rmse	index_all.s_index	index_all.s_HP	index_mean.PC	index_mean.cc_index	index_mean.r_correlation	index_mean.rmse	index_mean.s_index	index_mean.s_HP	index_sd.PC	index_sd.cc_index	index_sd.r_correlation	index_sd.rmse	index_sd.s_index	index_sd.s_HP
1	1 vs. 2	1	0.5921	0.5912	0.2975	0.4375	0.3333	1	0.89884612244898	0.903832	0.13500693877551	0.853011102040816	0.389999673469388	1	0.102650607765256	0.100856964519843	0.0636681222951117	0.130103373143979	0.0423790449114384
2	1 vs. 2	2	0.9682	0.959	0.1207	0.8485	0.3125	2	0.98733412244898	0.985032326530612	0.0720954285714286	0.92485012244898	0.374998775510204	2	0.0100464514953486	0.0123890461273489	0.0270997599415362	0.0467822755882719	0.0481111504828868
3	1 vs. 2	3	0.2906	0.259	0.3508	0.5455	0.5417	3	0.755337551020408	0.757762775510204	0.185275510204082	0.653356163265306	0.506666612244898	3	0.215412445918853	0.212311770503312	0.0832591056930451	0.204524859292461	0.0496309945955463
4	1 vs. 3	1	0.6319	0.6605	0.2863	0.4	0.375	1	0.89884612244898	0.903832	0.13500693877551	0.853011102040816	0.389999673469388	1	0.102650607765256	0.100856964519843	0.0636681222951117	0.130103373143979	0.0423790449114384
5	1 vs. 3	2	0.9651	0.9568	0.1283	0.8824	0.2917	2	0.98733412244898	0.985032326530612	0.0720954285714286	0.92485012244898	0.374998775510204	2	0.0100464514953486	0.0123890461273489	0.0270997599415362	0.0467822755882719	0.0481111504828868
6	1 vs. 3	3	0.1627	0.1896	0.381	0.2609	0.5208	3	0.755337551020408	0.757762775510204	0.185275510204082	0.653356163265306	0.506666612244898	3	0.215412445918853	0.212311770503312	0.0832591056930451	0.204524859292461	0.0496309945955463
7	1 vs. 4	1	0.5448	0.5514	0.3155	0.3448	0.3958	1	0.89884612244898	0.903832	0.13500693877551	0.853011102040816	0.389999673469388	1	0.102650607765256	0.100856964519843	0.0636681222951117	0.130103373143979	0.0423790449114384
8	1 vs. 4	2	0.939	0.9215	0.1673	0.8485	0.3125	2	0.98733412244898	0.985032326530612	0.0720954285714286	0.92485012244898	0.374998775510204	2	0.0100464514953486	0.0123890461273489	0.0270997599415362	0.0467822755882719	0.0481111504828868
9	1 vs. 4	3	0.7737	0.7462	0.2042	0.7	0.5833	3	0.755337551020408	0.757762775510204	0.185275510204082	0.653356163265306	0.506666612244898	3	0.215412445918853	0.212311770503312	0.0832591056930451	0.204524859292461	0.0496309945955463
10	1 vs. 5	1	0.595	0.5963	0.2941	0.4286	0.4167	1	0.89884612244898	0.903832	0.13500693877551	0.853011102040816	0.389999673469388	1	0.102650607765256	0.100856964519843	0.0636681222951117	0.130103373143979	0.0423790449114384
11	1 vs. 5	2	0.9622	0.9528	0.132	0.8889	0.25	2	0.98733412244898	0.985032326530612	0.0720954285714286	0.92485012244898	0.374998775510204	2	0.0100464514953486	0.0123890461273489	0.0270997599415362	0.0467822755882719	0.0481111504828868
12	1 vs. 5	3	0.2278	0.2126	0.3738	0.32	0.4792	3	0.755337551020408	0.757762775510204	0.185275510204082	0.653356163265306	0.506666612244898	3	0.215412445918853	0.212311770503312	0.0832591056930451	0.204524859292461	0.0496309945955463
13	1 vs. 6	1	0.7384	0.7328	0.2437	0.4	0.375	1	0.89884612244898	0.903832	0.13500693877551	0.853011102040816	0.389999673469388	1	0.102650607765256	0.100856964519843	0.0636681222951117	0.130103373143979	0.0423790449114384
14	1 vs. 6	2	0.9551	0.9431	0.1437	0.8824	0.2917	2	0.98733412244898	0.985032326530612	0.0720954285714286	0.92485012244898	0.374998775510204	2	0.0100464514953486	0.0123890461273489	0.0270997599415362	0.0467822755882719	0.0481111504828868
15	1 vs. 6	3	0.8905	0.8649	0.1443	0.8421	0.6042	3	0.755337551020408	0.757762775510204	0.185275510204082	0.653356163265306	0.506666612244898	3	0.215412445918853	0.212311770503312	0.0832591056930451	0.204524859292461	0.0496309945955463
16	1 vs. 7	1	0.536	0.5446	0.3122	0.3448	0.3958	1	0.89884612244898	0.903832	0.13500693877551	0.853011102040816	0.389999673469388	1	0.102650607765256	0.100856964519843	0.0636681222951117	0.130103373143979	0.0423790449114384
17	1 vs. 7	2	0.9518	0.9389	0.1488	0.8125	0.3333	2	0.98733412244898	0.985032326530612	0.0720954285714286	0.92485012244898	0.374998775510204	2	0.0100464514953486	0.0123890461273489	0.0270997599415362	0.0467822755882719	0.0481111504828868
18	1 vs. 7	3	0.6869	0.6499	0.2387	0.7273	0.5417	3	0.755337551020408	0.757762775510204	0.185275510204082	0.653356163265306	0.506666612244898	3	0.215412445918853	0.212311770503312	0.0832591056930451	0.204524859292461	0.0496309945955463
19	1 vs. 8	1	0.3437	0.3281	0.3638	0.2857	0.4167	1	0.89884612244898	0.903832	0.13500693877551	0.853011102040816	0.389999673469388	1	0.102650607765256	0.100856964519843	0.0636681222951117	0.130103373143979	0.0423790449114384
20	1 vs. 8	2	0.9368	0.9176	0.1696	0.8485	0.3125	2	0.98733412244898	0.985032326530612	0.0720954285714286	0.92485012244898	0.374998775510204	2	0.0100464514953486	0.0123890461273489	0.0270997599415362	0.0467822755882719	0.0481111504828868
21	1 vs. 8	3	0.747	0.6927	0.2152	0.7619	0.5625	3	0.755337551020408	0.757762775510204	0.185275510204082	0.653356163265306	0.506666612244898	3	0.215412445918853	0.212311770503312	0.0832591056930451	0.204524859292461	0.0496309945955463
22	1 vs. 9	1	0.4901	0.4969	0.3271	0.4286	0.4167	1	0.89884612244898	0.903832	0.13500693877551	0.853011102040816	0.389999673469388	1	0.102650607765256	0.100856964519843	0.0636681222951117	0.130103373143979	0.0423790449114384
23	1 vs. 9	2	0.9461	0.9311	0.1572	0.8125	0.3333	2	0.98733412244898	0.985032326530612	0.0720954285714286	0.92485012244898	0.374998775510204	2	0.0100464514953486	0.0123890461273489	0.0270997599415362	0.0467822755882719	0.0481111504828868
24	1 vs. 9	3	0.3036	0.297	0.3495	0.4545	0.5417	3	0.755337551020408	0.757762775510204	0.185275510204082	0.653356163265306	0.506666612244898	3	0.215412445918853	0.212311770503312	0.0832591056930451	0.204524859292461	0.0496309945955463
25	1 vs. 10	1	0.4691	0.4906	0.334	0.3448	0.3958	1	0.89884612244898	0.903832	0.13500693877551	0.853011102040816	0.389999673469388	1	0.102650607765256	0.100856964519843	0.0636681222951117	0.130103373143979	0.0423790449114384
26	1 vs. 10	2	0.9643	0.9559	0.1281	0.8125	0.3333	2	0.98733412244898	0.985032326530612	0.0720954285714286	0.92485012244898	0.374998775510204	2	0.0100464514953486	0.0123890461273489	0.0270997599415362	0.0467822755882719	0.0481111504828868
27	1 vs. 10	3	0.5257	0.4702	0.2902	0.5455	0.5417	3	0.755337551020408	0.757762775510204	0.185275510204082	0.653356163265306	0.506666612244898	3	0.215412445918853	0.212311770503312	0.0832591056930451	0.204524859292461	0.0496309945955463
28	1 vs. 11	1	0.6061	0.6075	0.2968	0.4	0.375	1	0.89884612244898	0.903832	0.13500693877551	0.853011102040816	0.389999673469388	1	0.102650607765256	0.100856964519843	0.0636681222951117	0.130103373143979	0.0423790449114384
29	1 vs. 11	2	0.9558	0.9428	0.1421	0.8485	0.3125	2	0.98733412244898	0.985032326530612	0.0720954285714286	0.92485012244898	0.374998775510204	2	0.0100464514953486	0.0123890461273489	0.0270997599415362	0.0467822755882719	0.0481111504828868
30	1 vs. 11	3	0.7651	0.7179	0.2103	0.7826	0.5208	3	0.755337551020408	0.757762775510204	0.185275510204082	0.653356163265306	0.506666612244898	3	0.215412445918853	0.212311770503312	0.0832591056930451	0.204524859292461	0.0496309945955463
31	1 vs. 12	1	0.7772	0.7677	0.2278	0.5517	0.3958	1	0.89884612244898	0.903832	0.13500693877551	0.853011102040816	0.389999673469388	1	0.102650607765256	0.100856964519843	0.0636681222951117	0.130103373143979	0.0423790449114384
32	1 vs. 12	2	0.9683	0.9594	0.1218	0.8889	0.25	2	0.98733412244898	0.985032326530612	0.0720954285714286	0.92485012244898	0.374998775510204	2	0.0100464514953486	0.0123890461273489	0.0270997599415362	0.0467822755882719	0.0481111504828868
33	1 vs. 12	3	0.7128	0.6705	0.2326	0.7273	0.5417	3	0.755337551020408	0.757762775510204	0.185275510204082	0.653356163265306	0.506666612244898	3	0.215412445918853	0.212311770503312	0.0832591056930451	0.204524859292461	0.0496309945955463
34	1 vs. 13	1	0.4208	0.4114	0.3435	0.4516	0.3542	1	0.89884612244898	0.903832	0.13500693877551	0.853011102040816	0.389999673469388	1	0.102650607765256	0.100856964519843	0.0636681222951117	0.130103373143979	0.0423790449114384
35	1 vs. 13	2	0.9619	0.9506	0.1334	0.8125	0.3333	2	0.98733412244898	0.985032326530612	0.0720954285714286	0.92485012244898	0.374998775510204	2	0.0100464514953486	0.0123890461273489	0.0270997599415362	0.0467822755882719	0.0481111504828868
36	1 vs. 13	3	0.6911	0.6159	0.2421	0.7619	0.5625	3	0.755337551020408	0.757762775510204	0.185275510204082	0.653356163265306	0.506666612244898	3	0.215412445918853	0.212311770503312	0.0832591056930451	0.204524859292461	0.0496309945955463
37	1 vs. 14	1	0.6983	0.6935	0.2594	0.4138	0.3958	1	0.89884612244898	0.903832	0.13500693877551	0.853011102040816	0.389999673469388	1	0.102650607765256	0.100856964519843	0.0636681222951117	0.130103373143979	0.0423790449114384
38	1 vs. 14	2	0.9608	0.9495	0.1348	0.8824	0.2917	2	0.98733412244898	0.985032326530612	0.0720954285714286	0.92485012244898	0.374998775510204	2	0.0100464514953486	0.0123890461273489	0.0270997599415362	0.0467822755882719	0.0481111504828868
39	1 vs. 14	3	0.6131	0.5248	0.2635	0.4762	0.5625	3	0.755337551020408	0.757762775510204	0.185275510204082	0.653356163265306	0.506666612244898	3	0.215412445918853	0.212311770503312	0.0832591056930451	0.204524859292461	0.0496309945955463
40	1 vs. 15	1	0.6459	0.6397	0.2782	0.3871	0.3542	1	0.89884612244898	0.903832	0.13500693877551	0.853011102040816	0.389999673469388	1	0.102650607765256	0.100856964519843	0.0636681222951117	0.130103373143979	0.0423790449114384
41	1 vs. 15	2	0.9687	0.9599	0.1198	0.8824	0.2917	2	0.98733412244898	0.985032326530612	0.0720954285714286	0.92485012244898	0.374998775510204	2	0.0100464514953486	0.0123890461273489	0.0270997599415362	0.0467822755882719	0.0481111504828868
42	1 vs. 15	3	0.6014	0.5181	0.2688	0.5455	0.5417	3	0.755337551020408	0.757762775510204	0.185275510204082	0.653356163265306	0.506666612244898	3	0.215412445918853	0.212311770503312	0.0832591056930451	0.204524859292461	0.0496309945955463
43	1 vs. 16	1	0.559	0.5958	0.3105	0.5	0.4167	1	0.89884612244898	0.903832	0.13500693877551	0.853011102040816	0.389999673469388	1	0.102650607765256	0.100856964519843	0.0636681222951117	0.130103373143979	0.0423790449114384
44	1 vs. 16	2	0.9628	0.9591	0.1306	0.8485	0.3125	2	0.98733412244898	0.985032326530612	0.0720954285714286	0.92485012244898	0.374998775510204	2	0.0100464514953486	0.0123890461273489	0.0270997599415362	0.0467822755882719	0.0481111504828868
45	1 vs. 16	3	0.0602	0.0859	0.405	0.1739	0.5208	3	0.755337551020408	0.757762775510204	0.185275510204082	0.653356163265306	0.506666612244898	3	0.215412445918853	0.212311770503312	0.0832591056930451	0.204524859292461	0.0496309945955463
46	1 vs. 17	1	0.6958	0.6951	0.2605	0.4	0.375	1	0.89884612244898	0.903832	0.13500693877551	0.853011102040816	0.389999673469388	1	0.102650607765256	0.100856964519843	0.0636681222951117	0.130103373143979	0.0423790449114384
47	1 vs. 17	2	0.9518	0.9377	0.1492	0.8824	0.2917	2	0.98733412244898	0.985032326530612	0.0720954285714286	0.92485012244898	0.374998775510204	2	0.0100464514953486	0.0123890461273489	0.0270997599415362	0.0467822755882719	0.0481111504828868
48	1 vs. 17	3	0.8404	0.8079	0.1771	0.9	0.5833	3	0.755337551020408	0.757762775510204	0.185275510204082	0.653356163265306	0.506666612244898	3	0.215412445918853	0.212311770503312	0.0832591056930451	0.204524859292461	0.0496309945955463
49	1 vs. 18	1	0.6022	0.6242	0.2985	0.4516	0.3542	1	0.89884612244898	0.903832	0.13500693877551	0.853011102040816	0.389999673469388	1	0.102650607765256	0.100856964519843	0.0636681222951117	0.130103373143979	0.0423790449114384
50	1 vs. 18	2	0.9606	0.952	0.1348	0.8824	0.2917	2	0.98733412244898	0.985032326530612	0.0720954285714286	0.92485012244898	0.374998775510204	2	0.0100464514953486	0.0123890461273489	0.0270997599415362	0.0467822755882719	0.0481111504828868
51	1 vs. 18	3	0.6284	0.6189	0.2532	0.6364	0.5417	3	0.755337551020408	0.757762775510204	0.185275510204082	0.653356163265306	0.506666612244898	3	0.215412445918853	0.212311770503312	0.0832591056930451	0.204524859292461	0.0496309945955463
52	1 vs. 19	1	0.6274	0.6297	0.2841	0.4516	0.3542	1	0.89884612244898	0.903832	0.13500693877551	0.853011102040816	0.389999673469388	1	0.102650607765256	0.100856964519843	0.0636681222951117	0.130103373143979	0.0423790449114384
53	1 vs. 19	2	0.9675	0.9583	0.1226	0.8824	0.2917	2	0.98733412244898	0.985032326530612	0.0720954285714286	0.92485012244898	0.374998775510204	2	0.0100464514953486	0.0123890461273489	0.0270997599415362	0.0467822755882719	0.0481111504828868
54	1 vs. 19	3	0.6159	0.549	0.2564	0.6957	0.5208	3	0.755337551020408	0.757762775510204	0.185275510204082	0.653356163265306	0.506666612244898	3	0.215412445918853	0.212311770503312	0.0832591056930451	0.204524859292461	0.0496309945955463
55	1 vs. 20	1	0.6425	0.6625	0.2765	0.2222	0.4375	1	0.89884612244898	0.903832	0.13500693877551	0.853011102040816	0.389999673469388	1	0.102650607765256	0.100856964519843	0.0636681222951117	0.130103373143979	0.0423790449114384
56	1 vs. 20	2	0.9461	0.9328	0.1567	0.8125	0.3333	2	0.98733412244898	0.985032326530612	0.0720954285714286	0.92485012244898	0.374998775510204	2	0.0100464514953486	0.0123890461273489	0.0270997599415362	0.0467822755882719	0.0481111504828868
57	1 vs. 20	3	0.7668	0.7445	0.2065	0.8421	0.6042	3	0.755337551020408	0.757762775510204	0.185275510204082	0.653356163265306	0.506666612244898	3	0.215412445918853	0.212311770503312	0.0832591056930451	0.204524859292461	0.0496309945955463
58	1 vs. 21	1	0.7244	0.7074	0.2478	0.4	0.375	1	0.89884612244898	0.903832	0.13500693877551	0.853011102040816	0.389999673469388	1	0.102650607765256	0.100856964519843	0.0636681222951117	0.130103373143979	0.0423790449114384
59	1 vs. 21	2	0.9739	0.9693	0.1112	0.9474	0.2083	2	0.98733412244898	0.985032326530612	0.0720954285714286	0.92485012244898	0.374998775510204	2	0.0100464514953486	0.0123890461273489	0.0270997599415362	0.0467822755882719	0.0481111504828868
60	1 vs. 21	3	0.0108	0.0131	0.3991	0.2857	0.5625	3	0.755337551020408	0.757762775510204	0.185275510204082	0.653356163265306	0.506666612244898	3	0.215412445918853	0.212311770503312	0.0832591056930451	0.204524859292461	0.0496309945955463
61	1 vs. 22	1	0.6963	0.7119	0.2591	0.3448	0.3958	1	0.89884612244898	0.903832	0.13500693877551	0.853011102040816	0.389999673469388	1	0.102650607765256	0.100856964519843	0.0636681222951117	0.130103373143979	0.0423790449114384
62	1 vs. 22	2	0.9557	0.9436	0.1425	0.9143	0.2708	2	0.98733412244898	0.985032326530612	0.0720954285714286	0.92485012244898	0.374998775510204	2	0.0100464514953486	0.0123890461273489	0.0270997599415362	0.0467822755882719	0.0481111504828868
63	1 vs. 22	3	0.7508	0.7422	0.2108	0.8	0.5833	3	0.755337551020408	0.757762775510204	0.185275510204082	0.653356163265306	0.506666612244898	3	0.215412445918853	0.212311770503312	0.0832591056930451	0.204524859292461	0.0496309945955463
64	1 vs. 23	1	0.5462	0.5455	0.313	0.4375	0.3333	1	0.89884612244898	0.903832	0.13500693877551	0.853011102040816	0.389999673469388	1	0.102650607765256	0.100856964519843	0.0636681222951117	0.130103373143979	0.0423790449114384
65	1 vs. 23	2	0.9566	0.9456	0.1414	0.8125	0.3333	2	0.98733412244898	0.985032326530612	0.0720954285714286	0.92485012244898	0.374998775510204	2	0.0100464514953486	0.0123890461273489	0.0270997599415362	0.0467822755882719	0.0481111504828868
66	1 vs. 23	3	0.7069	0.6519	0.2316	0.7619	0.5625	3	0.755337551020408	0.757762775510204	0.185275510204082	0.653356163265306	0.506666612244898	3	0.215412445918853	0.212311770503312	0.0832591056930451	0.204524859292461	0.0496309945955463
67	1 vs. 24	1	0.7239	0.7237	0.2543	0.4	0.375	1	0.89884612244898	0.903832	0.13500693877551	0.853011102040816	0.389999673469388	1	0.102650607765256	0.100856964519843	0.0636681222951117	0.130103373143979	0.0423790449114384
68	1 vs. 24	2	0.9584	0.9465	0.1384	0.9143	0.2708	2	0.98733412244898	0.985032326530612	0.0720954285714286	0.92485012244898	0.374998775510204	2	0.0100464514953486	0.0123890461273489	0.0270997599415362	0.0467822755882719	0.0481111504828868
69	1 vs. 24	3	0.8571	0.8263	0.1656	0.8	0.5833	3	0.755337551020408	0.757762775510204	0.185275510204082	0.653356163265306	0.506666612244898	3	0.215412445918853	0.212311770503312	0.0832591056930451	0.204524859292461	0.0496309945955463
70	1 vs. 25	1	0.7093	0.7189	0.2559	0.4	0.375	1	0.89884612244898	0.903832	0.13500693877551	0.853011102040816	0.389999673469388	1	0.102650607765256	0.100856964519843	0.0636681222951117	0.130103373143979	0.0423790449114384
71	1 vs. 25	2	0.9694	0.9608	0.1197	0.9143	0.2708	2	0.98733412244898	0.985032326530612	0.0720954285714286	0.92485012244898	0.374998775510204	2	0.0100464514953486	0.0123890461273489	0.0270997599415362	0.0467822755882719	0.0481111504828868
72	1 vs. 25	3	0.4293	0.4466	0.3094	0.5263	0.6042	3	0.755337551020408	0.757762775510204	0.185275510204082	0.653356163265306	0.506666612244898	3	0.215412445918853	0.212311770503312	0.0832591056930451	0.204524859292461	0.0496309945955463
73	1 vs. 26	1	0.6253	0.6204	0.292	0.3871	0.3542	1	0.89884612244898	0.903832	0.13500693877551	0.853011102040816	0.389999673469388	1	0.102650607765256	0.100856964519843	0.0636681222951117	0.130103373143979	0.0423790449114384
74	1 vs. 26	2	0.9578	0.9454	0.1396	0.8485	0.3125	2	0.98733412244898	0.985032326530612	0.0720954285714286	0.92485012244898	0.374998775510204	2	0.0100464514953486	0.0123890461273489	0.0270997599415362	0.0467822755882719	0.0481111504828868
75	1 vs. 26	3	0.6911	0.6296	0.2347	0.8	0.5833	3	0.755337551020408	0.757762775510204	0.185275510204082	0.653356163265306	0.506666612244898	3	0.215412445918853	0.212311770503312	0.0832591056930451	0.204524859292461	0.0496309945955463
76	1 vs. 27	1	0.5557	0.5743	0.3115	0.4242	0.3125	1	0.89884612244898	0.903832	0.13500693877551	0.853011102040816	0.389999673469388	1	0.102650607765256	0.100856964519843	0.0636681222951117	0.130103373143979	0.0423790449114384
77	1 vs. 27	2	0.9759	0.9699	0.1058	0.8485	0.3125	2	0.98733412244898	0.985032326530612	0.0720954285714286	0.92485012244898	0.374998775510204	2	0.0100464514953486	0.0123890461273489	0.0270997599415362	0.0467822755882719	0.0481111504828868
78	1 vs. 27	3	0.2576	0.2572	0.3537	0.3	0.5833	3	0.755337551020408	0.757762775510204	0.185275510204082	0.653356163265306	0.506666612244898	3	0.215412445918853	0.212311770503312	0.0832591056930451	0.204524859292461	0.0496309945955463
79	1 vs. 28	1	0.6179	0.627	0.2916	0.3704	0.4375	1	0.89884612244898	0.903832	0.13500693877551	0.853011102040816	0.389999673469388	1	0.102650607765256	0.100856964519843	0.0636681222951117	0.130103373143979	0.0423790449114384
80	1 vs. 28	2	0.9596	0.9481	0.1372	0.8824	0.2917	2	0.98733412244898	0.985032326530612	0.0720954285714286	0.92485012244898	0.374998775510204	2	0.0100464514953486	0.0123890461273489	0.0270997599415362	0.0467822755882719	0.0481111504828868
81	1 vs. 28	3	0.5102	0.4648	0.2969	0.6	0.5833	3	0.755337551020408	0.757762775510204	0.185275510204082	0.653356163265306	0.506666612244898	3	0.215412445918853	0.212311770503312	0.0832591056930451	0.204524859292461	0.0496309945955463
82	1 vs. 29	1	0.5093	0.5249	0.3244	0.3448	0.3958	1	0.89884612244898	0.903832	0.13500693877551	0.853011102040816	0.389999673469388	1	0.102650607765256	0.100856964519843	0.0636681222951117	0.130103373143979	0.0423790449114384
83	1 vs. 29	2	0.938	0.9223	0.1679	0.8125	0.3333	2	0.98733412244898	0.985032326530612	0.0720954285714286	0.92485012244898	0.374998775510204	2	0.0100464514953486	0.0123890461273489	0.0270997599415362	0.0467822755882719	0.0481111504828868
84	1 vs. 29	3	0.6499	0.6017	0.2548	0.6667	0.5625	3	0.755337551020408	0.757762775510204	0.185275510204082	0.653356163265306	0.506666612244898	3	0.215412445918853	0.212311770503312	0.0832591056930451	0.204524859292461	0.0496309945955463
85	1 vs. 30	1	0.7188	0.7033	0.2534	0.5517	0.3958	1	0.89884612244898	0.903832	0.13500693877551	0.853011102040816	0.389999673469388	1	0.102650607765256	0.100856964519843	0.0636681222951117	0.130103373143979	0.0423790449114384
86	1 vs. 30	2	0.9573	0.9465	0.1417	0.8889	0.25	2	0.98733412244898	0.985032326530612	0.0720954285714286	0.92485012244898	0.374998775510204	2	0.0100464514953486	0.0123890461273489	0.0270997599415362	0.0467822755882719	0.0481111504828868
87	1 vs. 30	3	0.7339	0.7298	0.2153	0.6667	0.625	3	0.755337551020408	0.757762775510204	0.185275510204082	0.653356163265306	0.506666612244898	3	0.215412445918853	0.212311770503312	0.0832591056930451	0.204524859292461	0.0496309945955463
88	1 vs. 31	1	0.5818	0.5727	0.3005	0.3448	0.3958	1	0.89884612244898	0.903832	0.13500693877551	0.853011102040816	0.389999673469388	1	0.102650607765256	0.100856964519843	0.0636681222951117	0.130103373143979	0.0423790449114384
89	1 vs. 31	2	0.9587	0.9464	0.1375	0.8485	0.3125	2	0.98733412244898	0.985032326530612	0.0720954285714286	0.92485012244898	0.374998775510204	2	0.0100464514953486	0.0123890461273489	0.0270997599415362	0.0467822755882719	0.0481111504828868
90	1 vs. 31	3	0.804	0.7604	0.1925	0.7273	0.5417	3	0.755337551020408	0.757762775510204	0.185275510204082	0.653356163265306	0.506666612244898	3	0.215412445918853	0.212311770503312	0.0832591056930451	0.204524859292461	0.0496309945955463
91	1 vs. 32	1	0.7759	0.7628	0.2229	0.4138	0.3958	1	0.89884612244898	0.903832	0.13500693877551	0.853011102040816	0.389999673469388	1	0.102650607765256	0.100856964519843	0.0636681222951117	0.130103373143979	0.0423790449114384
92	1 vs. 32	2	0.9676	0.9583	0.123	0.8571	0.2708	2	0.98733412244898	0.985032326530612	0.0720954285714286	0.92485012244898	0.374998775510204	2	0.0100464514953486	0.0123890461273489	0.0270997599415362	0.0467822755882719	0.0481111504828868
93	1 vs. 32	3	0.6105	0.5753	0.2617	0.5714	0.5625	3	0.755337551020408	0.757762775510204	0.185275510204082	0.653356163265306	0.506666612244898	3	0.215412445918853	0.212311770503312	0.0832591056930451	0.204524859292461	0.0496309945955463
94	1 vs. 33	1	0.3074	0.3383	0.3785	0.2308	0.4583	1	0.89884612244898	0.903832	0.13500693877551	0.853011102040816	0.389999673469388	1	0.102650607765256	0.100856964519843	0.0636681222951117	0.130103373143979	0.0423790449114384
95	1 vs. 33	2	0.9547	0.9454	0.1438	0.8125	0.3333	2	0.98733412244898	0.985032326530612	0.0720954285714286	0.92485012244898	0.374998775510204	2	0.0100464514953486	0.0123890461273489	0.0270997599415362	0.0467822755882719	0.0481111504828868
96	1 vs. 33	3	0.5329	0.4987	0.2834	0.4762	0.5625	3	0.755337551020408	0.757762775510204	0.185275510204082	0.653356163265306	0.506666612244898	3	0.215412445918853	0.212311770503312	0.0832591056930451	0.204524859292461	0.0496309945955463
97	1 vs. 34	1	0.7417	0.7334	0.2417	0.3448	0.3958	1	0.89884612244898	0.903832	0.13500693877551	0.853011102040816	0.389999673469388	1	0.102650607765256	0.100856964519843	0.0636681222951117	0.130103373143979	0.0423790449114384
98	1 vs. 34	2	0.9615	0.9501	0.1331	0.8824	0.2917	2	0.98733412244898	0.985032326530612	0.0720954285714286	0.92485012244898	0.374998775510204	2	0.0100464514953486	0.0123890461273489	0.0270997599415362	0.0467822755882719	0.0481111504828868
99	1 vs. 34	3	0.6655	0.6077	0.2448	0.5714	0.5625	3	0.755337551020408	0.757762775510204	0.185275510204082	0.653356163265306	0.506666612244898	3	0.215412445918853	0.212311770503312	0.0832591056930451	0.204524859292461	0.0496309945955463
100	1 vs. 35	1	0.734	0.7443	0.2455	0.3871	0.3542	1	0.89884612244898	0.903832	0.13500693877551	0.853011102040816	0.389999673469388	1	0.102650607765256	0.100856964519843	0.0636681222951117	0.130103373143979	0.0423790449114384
101	1 vs. 35	2	0.9752	0.9679	0.1084	0.9143	0.2708	2	0.98733412244898	0.985032326530612	0.0720954285714286	0.92485012244898	0.374998775510204	2	0.0100464514953486	0.0123890461273489	0.0270997599415362	0.0467822755882719	0.0481111504828868
102	1 vs. 35	3	0.6824	0.6587	0.2397	0.6667	0.5625	3	0.755337551020408	0.757762775510204	0.185275510204082	0.653356163265306	0.506666612244898	3	0.215412445918853	0.212311770503312	0.0832591056930451	0.204524859292461	0.0496309945955463
103	1 vs. 36	1	0.76	0.7515	0.2338	0.4516	0.3542	1	0.89884612244898	0.903832	0.13500693877551	0.853011102040816	0.389999673469388	1	0.102650607765256	0.100856964519843	0.0636681222951117	0.130103373143979	0.0423790449114384
104	1 vs. 36	2	0.9644	0.9542	0.1291	0.8649	0.2292	2	0.98733412244898	0.985032326530612	0.0720954285714286	0.92485012244898	0.374998775510204	2	0.0100464514953486	0.0123890461273489	0.0270997599415362	0.0467822755882719	0.0481111504828868
105	1 vs. 36	3	0.8354	0.8004	0.1744	0.7368	0.6042	3	0.755337551020408	0.757762775510204	0.185275510204082	0.653356163265306	0.506666612244898	3	0.215412445918853	0.212311770503312	0.0832591056930451	0.204524859292461	0.0496309945955463
106	1 vs. 37	1	0.5322	0.5534	0.3198	0.4516	0.3542	1	0.89884612244898	0.903832	0.13500693877551	0.853011102040816	0.389999673469388	1	0.102650607765256	0.100856964519843	0.0636681222951117	0.130103373143979	0.0423790449114384
107	1 vs. 37	2	0.9556	0.9464	0.1426	0.8125	0.3333	2	0.98733412244898	0.985032326530612	0.0720954285714286	0.92485012244898	0.374998775510204	2	0.0100464514953486	0.0123890461273489	0.0270997599415362	0.0467822755882719	0.0481111504828868
108	1 vs. 37	3	0.5502	0.488	0.2824	0.5455	0.5417	3	0.755337551020408	0.757762775510204	0.185275510204082	0.653356163265306	0.506666612244898	3	0.215412445918853	0.212311770503312	0.0832591056930451	0.204524859292461	0.0496309945955463
109	1 vs. 38	1	0.6449	0.6447	0.2803	0.4	0.375	1	0.89884612244898	0.903832	0.13500693877551	0.853011102040816	0.389999673469388	1	0.102650607765256	0.100856964519843	0.0636681222951117	0.130103373143979	0.0423790449114384
110	1 vs. 38	2	0.9653	0.9551	0.1276	0.8889	0.25	2	0.98733412244898	0.985032326530612	0.0720954285714286	0.92485012244898	0.374998775510204	2	0.0100464514953486	0.0123890461273489	0.0270997599415362	0.0467822755882719	0.0481111504828868
111	1 vs. 38	3	0.5526	0.5525	0.2774	0.6316	0.6042	3	0.755337551020408	0.757762775510204	0.185275510204082	0.653356163265306	0.506666612244898	3	0.215412445918853	0.212311770503312	0.0832591056930451	0.204524859292461	0.0496309945955463
112	1 vs. 39	1	0.6186	0.6259	0.2886	0.4	0.375	1	0.89884612244898	0.903832	0.13500693877551	0.853011102040816	0.389999673469388	1	0.102650607765256	0.100856964519843	0.0636681222951117	0.130103373143979	0.0423790449114384
113	1 vs. 39	2	0.942	0.9245	0.1648	0.9143	0.2708	2	0.98733412244898	0.985032326530612	0.0720954285714286	0.92485012244898	0.374998775510204	2	0.0100464514953486	0.0123890461273489	0.0270997599415362	0.0467822755882719	0.0481111504828868
114	1 vs. 39	3	0.8	0.7552	0.1935	0.7	0.5833	3	0.755337551020408	0.757762775510204	0.185275510204082	0.653356163265306	0.506666612244898	3	0.215412445918853	0.212311770503312	0.0832591056930451	0.204524859292461	0.0496309945955463
115	1 vs. 40	1	0.8291	0.8161	0.1996	0.4667	0.375	1	0.89884612244898	0.903832	0.13500693877551	0.853011102040816	0.389999673469388	1	0.102650607765256	0.100856964519843	0.0636681222951117	0.130103373143979	0.0423790449114384
116	1 vs. 40	2	0.9785	0.9734	0.1008	0.973	0.2292	2	0.98733412244898	0.985032326530612	0.0720954285714286	0.92485012244898	0.374998775510204	2	0.0100464514953486	0.0123890461273489	0.0270997599415362	0.0467822755882719	0.0481111504828868
117	1 vs. 40	3	0.7952	0.7581	0.1965	0.8	0.5833	3	0.755337551020408	0.757762775510204	0.185275510204082	0.653356163265306	0.506666612244898	3	0.215412445918853	0.212311770503312	0.0832591056930451	0.204524859292461	0.0496309945955463
118	1 vs. 41	1	0.7527	0.7445	0.2374	0.4	0.375	1	0.89884612244898	0.903832	0.13500693877551	0.853011102040816	0.389999673469388	1	0.102650607765256	0.100856964519843	0.0636681222951117	0.130103373143979	0.0423790449114384
119	1 vs. 41	2	0.9713	0.963	0.1157	0.8824	0.2917	2	0.98733412244898	0.985032326530612	0.0720954285714286	0.92485012244898	0.374998775510204	2	0.0100464514953486	0.0123890461273489	0.0270997599415362	0.0467822755882719	0.0481111504828868
120	1 vs. 41	3	0.6947	0.6479	0.2376	0.6087	0.5208	3	0.755337551020408	0.757762775510204	0.185275510204082	0.653356163265306	0.506666612244898	3	0.215412445918853	0.212311770503312	0.0832591056930451	0.204524859292461	0.0496309945955463
121	1 vs. 42	1	0.5384	0.5368	0.316	0.2857	0.4167	1	0.89884612244898	0.903832	0.13500693877551	0.853011102040816	0.389999673469388	1	0.102650607765256	0.100856964519843	0.0636681222951117	0.130103373143979	0.0423790449114384
122	1 vs. 42	2	0.9474	0.932	0.1551	0.8485	0.3125	2	0.98733412244898	0.985032326530612	0.0720954285714286	0.92485012244898	0.374998775510204	2	0.0100464514953486	0.0123890461273489	0.0270997599415362	0.0467822755882719	0.0481111504828868
123	1 vs. 42	3	0.7211	0.6896	0.221	0.8	0.5833	3	0.755337551020408	0.757762775510204	0.185275510204082	0.653356163265306	0.506666612244898	3	0.215412445918853	0.212311770503312	0.0832591056930451	0.204524859292461	0.0496309945955463
124	1 vs. 43	1	0.658	0.6664	0.2759	0.3448	0.3958	1	0.89884612244898	0.903832	0.13500693877551	0.853011102040816	0.389999673469388	1	0.102650607765256	0.100856964519843	0.0636681222951117	0.130103373143979	0.0423790449114384
125	1 vs. 43	2	0.9697	0.9608	0.1201	0.9143	0.2708	2	0.98733412244898	0.985032326530612	0.0720954285714286	0.92485012244898	0.374998775510204	2	0.0100464514953486	0.0123890461273489	0.0270997599415362	0.0467822755882719	0.0481111504828868
126	1 vs. 43	3	0.773	0.7258	0.2044	0.7273	0.5417	3	0.755337551020408	0.757762775510204	0.185275510204082	0.653356163265306	0.506666612244898	3	0.215412445918853	0.212311770503312	0.0832591056930451	0.204524859292461	0.0496309945955463
127	1 vs. 44	1	0.1904	0.1939	0.399	0	0.4583	1	0.89884612244898	0.903832	0.13500693877551	0.853011102040816	0.389999673469388	1	0.102650607765256	0.100856964519843	0.0636681222951117	0.130103373143979	0.0423790449114384
128	1 vs. 44	2	0.9507	0.9365	0.1514	0.8125	0.3333	2	0.98733412244898	0.985032326530612	0.0720954285714286	0.92485012244898	0.374998775510204	2	0.0100464514953486	0.0123890461273489	0.0270997599415362	0.0467822755882719	0.0481111504828868
129	1 vs. 44	3	0.6765	0.6239	0.2418	0.6957	0.5208	3	0.755337551020408	0.757762775510204	0.185275510204082	0.653356163265306	0.506666612244898	3	0.215412445918853	0.212311770503312	0.0832591056930451	0.204524859292461	0.0496309945955463
130	1 vs. 45	1	0.742	0.7319	0.2438	0.3333	0.375	1	0.89884612244898	0.903832	0.13500693877551	0.853011102040816	0.389999673469388	1	0.102650607765256	0.100856964519843	0.0636681222951117	0.130103373143979	0.0423790449114384
131	1 vs. 45	2	0.9727	0.9647	0.113	0.8889	0.25	2	0.98733412244898	0.985032326530612	0.0720954285714286	0.92485012244898	0.374998775510204	2	0.0100464514953486	0.0123890461273489	0.0270997599415362	0.0467822755882719	0.0481111504828868
132	1 vs. 45	3	0.8312	0.792	0.1815	0.7368	0.6042	3	0.755337551020408	0.757762775510204	0.185275510204082	0.653356163265306	0.506666612244898	3	0.215412445918853	0.212311770503312	0.0832591056930451	0.204524859292461	0.0496309945955463
133	1 vs. 46	1	0.4255	0.421	0.3407	0.4	0.375	1	0.89884612244898	0.903832	0.13500693877551	0.853011102040816	0.389999673469388	1	0.102650607765256	0.100856964519843	0.0636681222951117	0.130103373143979	0.0423790449114384
134	1 vs. 46	2	0.9462	0.9301	0.1557	0.7647	0.2917	2	0.98733412244898	0.985032326530612	0.0720954285714286	0.92485012244898	0.374998775510204	2	0.0100464514953486	0.0123890461273489	0.0270997599415362	0.0467822755882719	0.0481111504828868
135	1 vs. 46	3	0.19	0.2564	0.369	0.2222	0.625	3	0.755337551020408	0.757762775510204	0.185275510204082	0.653356163265306	0.506666612244898	3	0.215412445918853	0.212311770503312	0.0832591056930451	0.204524859292461	0.0496309945955463
136	1 vs. 47	1	0.6892	0.6992	0.265	0.4375	0.3333	1	0.89884612244898	0.903832	0.13500693877551	0.853011102040816	0.389999673469388	1	0.102650607765256	0.100856964519843	0.0636681222951117	0.130103373143979	0.0423790449114384
137	1 vs. 47	2	0.9705	0.9618	0.1175	0.9143	0.2708	2	0.98733412244898	0.985032326530612	0.0720954285714286	0.92485012244898	0.374998775510204	2	0.0100464514953486	0.0123890461273489	0.0270997599415362	0.0467822755882719	0.0481111504828868
138	1 vs. 47	3	0.8194	0.778	0.1831	0.8571	0.5625	3	0.755337551020408	0.757762775510204	0.185275510204082	0.653356163265306	0.506666612244898	3	0.215412445918853	0.212311770503312	0.0832591056930451	0.204524859292461	0.0496309945955463
139	1 vs. 48	1	0.5321	0.5289	0.3132	0.3871	0.3542	1	0.89884612244898	0.903832	0.13500693877551	0.853011102040816	0.389999673469388	1	0.102650607765256	0.100856964519843	0.0636681222951117	0.130103373143979	0.0423790449114384
140	1 vs. 48	2	0.9441	0.9273	0.1589	0.8125	0.3333	2	0.98733412244898	0.985032326530612	0.0720954285714286	0.92485012244898	0.374998775510204	2	0.0100464514953486	0.0123890461273489	0.0270997599415362	0.0467822755882719	0.0481111504828868
141	1 vs. 48	3	0.5809	0.6328	0.2671	0.625	0.6667	3	0.755337551020408	0.757762775510204	0.185275510204082	0.653356163265306	0.506666612244898	3	0.215412445918853	0.212311770503312	0.0832591056930451	0.204524859292461	0.0496309945955463
142	1 vs. 49	1	0.7892	0.7855	0.2229	0.4	0.375	1	0.89884612244898	0.903832	0.13500693877551	0.853011102040816	0.389999673469388	1	0.102650607765256	0.100856964519843	0.0636681222951117	0.130103373143979	0.0423790449114384
143	1 vs. 49	2	0.9688	0.9595	0.1214	0.9143	0.2708	2	0.98733412244898	0.985032326530612	0.0720954285714286	0.92485012244898	0.374998775510204	2	0.0100464514953486	0.0123890461273489	0.0270997599415362	0.0467822755882719	0.0481111504828868
144	1 vs. 49	3	0.8386	0.7996	0.1759	0.9	0.5833	3	0.755337551020408	0.757762775510204	0.185275510204082	0.653356163265306	0.506666612244898	3	0.215412445918853	0.212311770503312	0.0832591056930451	0.204524859292461	0.0496309945955463
145	1 vs. 50	1	0.3991	0.4355	0.3594	0.3333	0.375	1	0.89884612244898	0.903832	0.13500693877551	0.853011102040816	0.389999673469388	1	0.102650607765256	0.100856964519843	0.0636681222951117	0.130103373143979	0.0423790449114384
146	1 vs. 50	2	0.9399	0.9242	0.1657	0.8125	0.3333	2	0.98733412244898	0.985032326530612	0.0720954285714286	0.92485012244898	0.374998775510204	2	0.0100464514953486	0.0123890461273489	0.0270997599415362	0.0467822755882719	0.0481111504828868
147	1 vs. 50	3	0.582	0.5517	0.2737	0.5	0.5	3	0.755337551020408	0.757762775510204	0.185275510204082	0.653356163265306	0.506666612244898	3	0.215412445918853	0.212311770503312	0.0832591056930451	0.204524859292461	0.0496309945955463
148	2 vs. 3	1	0.9557	0.9618	0.0999	0.9375	0.3333	1	0.89884612244898	0.903832	0.13500693877551	0.853011102040816	0.389999673469388	1	0.102650607765256	0.100856964519843	0.0636681222951117	0.130103373143979	0.0423790449114384
149	2 vs. 3	2	0.989	0.9859	0.0724	0.9655	0.3958	2	0.98733412244898	0.985032326530612	0.0720954285714286	0.92485012244898	0.374998775510204	2	0.0100464514953486	0.0123890461273489	0.0270997599415362	0.0467822755882719	0.0481111504828868
150	2 vs. 3	3	0.912	0.9238	0.1166	0.8148	0.4375	3	0.755337551020408	0.757762775510204	0.185275510204082	0.653356163265306	0.506666612244898	3	0.215412445918853	0.212311770503312	0.0832591056930451	0.204524859292461	0.0496309945955463
151	2 vs. 4	1	0.9521	0.9526	0.1026	0.9032	0.3542	1	0.89884612244898	0.903832	0.13500693877551	0.853011102040816	0.389999673469388	1	0.102650607765256	0.100856964519843	0.0636681222951117	0.130103373143979	0.0423790449114384
152	2 vs. 4	2	0.9826	0.977	0.0894	0.9286	0.4167	2	0.98733412244898	0.985032326530612	0.0720954285714286	0.92485012244898	0.374998775510204	2	0.0100464514953486	0.0123890461273489	0.0270997599415362	0.0467822755882719	0.0481111504828868
153	2 vs. 4	3	0.128	0.0909	0.3795	0.3333	0.5	3	0.755337551020408	0.757762775510204	0.185275510204082	0.653356163265306	0.506666612244898	3	0.215412445918853	0.212311770503312	0.0832591056930451	0.204524859292461	0.0496309945955463
154	2 vs. 5	1	0.9217	0.9212	0.1297	0.8	0.375	1	0.89884612244898	0.903832	0.13500693877551	0.853011102040816	0.389999673469388	1	0.102650607765256	0.100856964519843	0.0636681222951117	0.130103373143979	0.0423790449114384
155	2 vs. 5	2	0.9905	0.9878	0.0662	0.9032	0.3542	2	0.98733412244898	0.985032326530612	0.0720954285714286	0.92485012244898	0.374998775510204	2	0.0100464514953486	0.0123890461273489	0.0270997599415362	0.0467822755882719	0.0481111504828868
156	2 vs. 5	3	0.965	0.9659	0.0766	0.8966	0.3958	3	0.755337551020408	0.757762775510204	0.185275510204082	0.653356163265306	0.506666612244898	3	0.215412445918853	0.212311770503312	0.0832591056930451	0.204524859292461	0.0496309945955463
157	2 vs. 6	1	0.9218	0.9223	0.134	0.875	0.3333	1	0.89884612244898	0.903832	0.13500693877551	0.853011102040816	0.389999673469388	1	0.102650607765256	0.100856964519843	0.0636681222951117	0.130103373143979	0.0423790449114384
158	2 vs. 6	2	0.9879	0.9841	0.0747	0.9655	0.3958	2	0.98733412244898	0.985032326530612	0.0720954285714286	0.92485012244898	0.374998775510204	2	0.0100464514953486	0.0123890461273489	0.0270997599415362	0.0467822755882719	0.0481111504828868
159	2 vs. 6	3	0.2641	0.2286	0.3557	0.5217	0.5208	3	0.755337551020408	0.757762775510204	0.185275510204082	0.653356163265306	0.506666612244898	3	0.215412445918853	0.212311770503312	0.0832591056930451	0.204524859292461	0.0496309945955463
160	2 vs. 7	1	0.9522	0.9532	0.1009	0.9032	0.3542	1	0.89884612244898	0.903832	0.13500693877551	0.853011102040816	0.389999673469388	1	0.102650607765256	0.100856964519843	0.0636681222951117	0.130103373143979	0.0423790449114384
161	2 vs. 7	2	0.992	0.99	0.0607	0.963	0.4375	2	0.98733412244898	0.985032326530612	0.0720954285714286	0.92485012244898	0.374998775510204	2	0.0100464514953486	0.0123890461273489	0.0270997599415362	0.0467822755882719	0.0481111504828868
162	2 vs. 7	3	0.769	0.7695	0.1944	0.7692	0.4583	3	0.755337551020408	0.757762775510204	0.185275510204082	0.653356163265306	0.506666612244898	3	0.215412445918853	0.212311770503312	0.0832591056930451	0.204524859292461	0.0496309945955463
163	2 vs. 8	1	0.8991	0.8982	0.1448	0.8	0.375	1	0.89884612244898	0.903832	0.13500693877551	0.853011102040816	0.389999673469388	1	0.102650607765256	0.100856964519843	0.0636681222951117	0.130103373143979	0.0423790449114384
164	2 vs. 8	2	0.9839	0.9784	0.0858	0.9286	0.4167	2	0.98733412244898	0.985032326530612	0.0720954285714286	0.92485012244898	0.374998775510204	2	0.0100464514953486	0.0123890461273489	0.0270997599415362	0.0467822755882719	0.0481111504828868
165	2 vs. 8	3	0.4748	0.4637	0.2935	0.64	0.4792	3	0.755337551020408	0.757762775510204	0.185275510204082	0.653356163265306	0.506666612244898	3	0.215412445918853	0.212311770503312	0.0832591056930451	0.204524859292461	0.0496309945955463
166	2 vs. 9	1	0.9267	0.9276	0.1247	0.8667	0.375	1	0.89884612244898	0.903832	0.13500693877551	0.853011102040816	0.389999673469388	1	0.102650607765256	0.100856964519843	0.0636681222951117	0.130103373143979	0.0423790449114384
167	2 vs. 9	2	0.9865	0.9824	0.0786	0.963	0.4375	2	0.98733412244898	0.985032326530612	0.0720954285714286	0.92485012244898	0.374998775510204	2	0.0100464514953486	0.0123890461273489	0.0270997599415362	0.0467822755882719	0.0481111504828868
168	2 vs. 9	3	0.9664	0.9674	0.0726	0.8462	0.4583	3	0.755337551020408	0.757762775510204	0.185275510204082	0.653356163265306	0.506666612244898	3	0.215412445918853	0.212311770503312	0.0832591056930451	0.204524859292461	0.0496309945955463
169	2 vs. 10	1	0.9591	0.9647	0.0935	0.9032	0.3542	1	0.89884612244898	0.903832	0.13500693877551	0.853011102040816	0.389999673469388	1	0.102650607765256	0.100856964519843	0.0636681222951117	0.130103373143979	0.0423790449114384
170	2 vs. 10	2	0.9938	0.9925	0.0535	0.963	0.4375	2	0.98733412244898	0.985032326530612	0.0720954285714286	0.92485012244898	0.374998775510204	2	0.0100464514953486	0.0123890461273489	0.0270997599415362	0.0467822755882719	0.0481111504828868
171	2 vs. 10	3	0.9117	0.9175	0.1184	1	0.4583	3	0.755337551020408	0.757762775510204	0.185275510204082	0.653356163265306	0.506666612244898	3	0.215412445918853	0.212311770503312	0.0832591056930451	0.204524859292461	0.0496309945955463
172	2 vs. 11	1	0.9635	0.9633	0.091	0.875	0.3333	1	0.89884612244898	0.903832	0.13500693877551	0.853011102040816	0.389999673469388	1	0.102650607765256	0.100856964519843	0.0636681222951117	0.130103373143979	0.0423790449114384
173	2 vs. 11	2	0.9925	0.9899	0.0587	0.9286	0.4167	2	0.98733412244898	0.985032326530612	0.0720954285714286	0.92485012244898	0.374998775510204	2	0.0100464514953486	0.0123890461273489	0.0270997599415362	0.0467822755882719	0.0481111504828868
174	2 vs. 11	3	0.6376	0.6414	0.2488	0.6667	0.4375	3	0.755337551020408	0.757762775510204	0.185275510204082	0.653356163265306	0.506666612244898	3	0.215412445918853	0.212311770503312	0.0832591056930451	0.204524859292461	0.0496309945955463
175	2 vs. 12	1	0.896	0.8988	0.1567	0.7742	0.3542	1	0.89884612244898	0.903832	0.13500693877551	0.853011102040816	0.389999673469388	1	0.102650607765256	0.100856964519843	0.0636681222951117	0.130103373143979	0.0423790449114384
176	2 vs. 12	2	0.9871	0.9847	0.0778	0.9032	0.3542	2	0.98733412244898	0.985032326530612	0.0720954285714286	0.92485012244898	0.374998775510204	2	0.0100464514953486	0.0123890461273489	0.0270997599415362	0.0467822755882719	0.0481111504828868
177	2 vs. 12	3	0.7541	0.7577	0.2056	0.7692	0.4583	3	0.755337551020408	0.757762775510204	0.185275510204082	0.653356163265306	0.506666612244898	3	0.215412445918853	0.212311770503312	0.0832591056930451	0.204524859292461	0.0496309945955463
178	2 vs. 13	1	0.876	0.8749	0.1605	0.9091	0.3125	1	0.89884612244898	0.903832	0.13500693877551	0.853011102040816	0.389999673469388	1	0.102650607765256	0.100856964519843	0.0636681222951117	0.130103373143979	0.0423790449114384
179	2 vs. 13	2	0.9828	0.9778	0.0897	0.8889	0.4375	2	0.98733412244898	0.985032326530612	0.0720954285714286	0.92485012244898	0.374998775510204	2	0.0100464514953486	0.0123890461273489	0.0270997599415362	0.0467822755882719	0.0481111504828868
180	2 vs. 13	3	0.3372	0.3117	0.3372	0.4	0.4792	3	0.755337551020408	0.757762775510204	0.185275510204082	0.653356163265306	0.506666612244898	3	0.215412445918853	0.212311770503312	0.0832591056930451	0.204524859292461	0.0496309945955463
181	2 vs. 14	1	0.9567	0.9571	0.0988	0.8387	0.3542	1	0.89884612244898	0.903832	0.13500693877551	0.853011102040816	0.389999673469388	1	0.102650607765256	0.100856964519843	0.0636681222951117	0.130103373143979	0.0423790449114384
182	2 vs. 14	2	0.9936	0.9914	0.0547	0.9655	0.3958	2	0.98733412244898	0.985032326530612	0.0720954285714286	0.92485012244898	0.374998775510204	2	0.0100464514953486	0.0123890461273489	0.0270997599415362	0.0467822755882719	0.0481111504828868
183	2 vs. 14	3	0.8078	0.8395	0.1757	0.8	0.4792	3	0.755337551020408	0.757762775510204	0.185275510204082	0.653356163265306	0.506666612244898	3	0.215412445918853	0.212311770503312	0.0832591056930451	0.204524859292461	0.0496309945955463
184	2 vs. 15	1	0.9829	0.9834	0.0614	0.9091	0.3125	1	0.89884612244898	0.903832	0.13500693877551	0.853011102040816	0.389999673469388	1	0.102650607765256	0.100856964519843	0.0636681222951117	0.130103373143979	0.0423790449114384
185	2 vs. 15	2	0.9958	0.9944	0.0437	0.9655	0.3958	2	0.98733412244898	0.985032326530612	0.0720954285714286	0.92485012244898	0.374998775510204	2	0.0100464514953486	0.0123890461273489	0.0270997599415362	0.0467822755882719	0.0481111504828868
186	2 vs. 15	3	0.8294	0.855	0.1668	0.9231	0.4583	3	0.755337551020408	0.757762775510204	0.185275510204082	0.653356163265306	0.506666612244898	3	0.215412445918853	0.212311770503312	0.0832591056930451	0.204524859292461	0.0496309945955463
187	2 vs. 16	1	0.9505	0.9613	0.1043	0.8667	0.375	1	0.89884612244898	0.903832	0.13500693877551	0.853011102040816	0.389999673469388	1	0.102650607765256	0.100856964519843	0.0636681222951117	0.130103373143979	0.0423790449114384
188	2 vs. 16	2	0.9906	0.9921	0.0656	0.9286	0.4167	2	0.98733412244898	0.985032326530612	0.0720954285714286	0.92485012244898	0.374998775510204	2	0.0100464514953486	0.0123890461273489	0.0270997599415362	0.0467822755882719	0.0481111504828868
189	2 vs. 16	3	0.9253	0.9407	0.1079	0.8148	0.4375	3	0.755337551020408	0.757762775510204	0.185275510204082	0.653356163265306	0.506666612244898	3	0.215412445918853	0.212311770503312	0.0832591056930451	0.204524859292461	0.0496309945955463
190	2 vs. 17	1	0.9553	0.955	0.1004	0.875	0.3333	1	0.89884612244898	0.903832	0.13500693877551	0.853011102040816	0.389999673469388	1	0.102650607765256	0.100856964519843	0.0636681222951117	0.130103373143979	0.0423790449114384
191	2 vs. 17	2	0.9865	0.9819	0.079	0.8966	0.3958	2	0.98733412244898	0.985032326530612	0.0720954285714286	0.92485012244898	0.374998775510204	2	0.0100464514953486	0.0123890461273489	0.0270997599415362	0.0467822755882719	0.0481111504828868
192	2 vs. 17	3	0.3681	0.345	0.3358	0.5833	0.5	3	0.755337551020408	0.757762775510204	0.185275510204082	0.653356163265306	0.506666612244898	3	0.215412445918853	0.212311770503312	0.0832591056930451	0.204524859292461	0.0496309945955463
193	2 vs. 18	1	0.9692	0.9734	0.0838	0.9697	0.3125	1	0.89884612244898	0.903832	0.13500693877551	0.853011102040816	0.389999673469388	1	0.102650607765256	0.100856964519843	0.0636681222951117	0.130103373143979	0.0423790449114384
194	2 vs. 18	2	0.9923	0.9912	0.0599	0.9655	0.3958	2	0.98733412244898	0.985032326530612	0.0720954285714286	0.92485012244898	0.374998775510204	2	0.0100464514953486	0.0123890461273489	0.0270997599415362	0.0467822755882719	0.0481111504828868
195	2 vs. 18	3	0.7762	0.7713	0.1842	0.7692	0.4583	3	0.755337551020408	0.757762775510204	0.185275510204082	0.653356163265306	0.506666612244898	3	0.215412445918853	0.212311770503312	0.0832591056930451	0.204524859292461	0.0496309945955463
196	2 vs. 19	1	0.9782	0.978	0.0689	0.9697	0.3125	1	0.89884612244898	0.903832	0.13500693877551	0.853011102040816	0.389999673469388	1	0.102650607765256	0.100856964519843	0.0636681222951117	0.130103373143979	0.0423790449114384
197	2 vs. 19	2	0.9968	0.9957	0.0389	0.9655	0.3958	2	0.98733412244898	0.985032326530612	0.0720954285714286	0.92485012244898	0.374998775510204	2	0.0100464514953486	0.0123890461273489	0.0270997599415362	0.0467822755882719	0.0481111504828868
198	2 vs. 19	3	0.7955	0.8068	0.1754	0.7407	0.4375	3	0.755337551020408	0.757762775510204	0.185275510204082	0.653356163265306	0.506666612244898	3	0.215412445918853	0.212311770503312	0.0832591056930451	0.204524859292461	0.0496309945955463
199	2 vs. 20	1	0.9506	0.9536	0.1031	0.8276	0.3958	1	0.89884612244898	0.903832	0.13500693877551	0.853011102040816	0.389999673469388	1	0.102650607765256	0.100856964519843	0.0636681222951117	0.130103373143979	0.0423790449114384
200	2 vs. 20	2	0.986	0.9829	0.0801	0.963	0.4375	2	0.98733412244898	0.985032326530612	0.0720954285714286	0.92485012244898	0.374998775510204	2	0.0100464514953486	0.0123890461273489	0.0270997599415362	0.0467822755882719	0.0481111504828868
201	2 vs. 20	3	0.5628	0.5515	0.2677	0.6087	0.5208	3	0.755337551020408	0.757762775510204	0.185275510204082	0.653356163265306	0.506666612244898	3	0.215412445918853	0.212311770503312	0.0832591056930451	0.204524859292461	0.0496309945955463
202	2 vs. 21	1	0.9311	0.9389	0.1243	0.875	0.3333	1	0.89884612244898	0.903832	0.13500693877551	0.853011102040816	0.389999673469388	1	0.102650607765256	0.100856964519843	0.0636681222951117	0.130103373143979	0.0423790449114384
203	2 vs. 21	2	0.9761	0.9752	0.1064	0.8485	0.3125	2	0.98733412244898	0.985032326530612	0.0720954285714286	0.92485012244898	0.374998775510204	2	0.0100464514953486	0.0123890461273489	0.0270997599415362	0.0467822755882719	0.0481111504828868
204	2 vs. 21	3	0.9047	0.9137	0.1185	0.72	0.4792	3	0.755337551020408	0.757762775510204	0.185275510204082	0.653356163265306	0.506666612244898	3	0.215412445918853	0.212311770503312	0.0832591056930451	0.204524859292461	0.0496309945955463
205	2 vs. 22	1	0.9463	0.9475	0.1093	0.9032	0.3542	1	0.89884612244898	0.903832	0.13500693877551	0.853011102040816	0.389999673469388	1	0.102650607765256	0.100856964519843	0.0636681222951117	0.130103373143979	0.0423790449114384
206	2 vs. 22	2	0.9907	0.9878	0.0655	0.9333	0.375	2	0.98733412244898	0.985032326530612	0.0720954285714286	0.92485012244898	0.374998775510204	2	0.0100464514953486	0.0123890461273489	0.0270997599415362	0.0467822755882719	0.0481111504828868
207	2 vs. 22	3	0.6006	0.5902	0.2511	0.6667	0.5	3	0.755337551020408	0.757762775510204	0.185275510204082	0.653356163265306	0.506666612244898	3	0.215412445918853	0.212311770503312	0.0832591056930451	0.204524859292461	0.0496309945955463
208	2 vs. 23	1	0.9848	0.9847	0.0575	0.9412	0.2917	1	0.89884612244898	0.903832	0.13500693877551	0.853011102040816	0.389999673469388	1	0.102650607765256	0.100856964519843	0.0636681222951117	0.130103373143979	0.0423790449114384
209	2 vs. 23	2	0.9908	0.9886	0.065	0.963	0.4375	2	0.98733412244898	0.985032326530612	0.0720954285714286	0.92485012244898	0.374998775510204	2	0.0100464514953486	0.0123890461273489	0.0270997599415362	0.0467822755882719	0.0481111504828868
210	2 vs. 23	3	0.6941	0.7003	0.2243	0.8	0.4792	3	0.755337551020408	0.757762775510204	0.185275510204082	0.653356163265306	0.506666612244898	3	0.215412445918853	0.212311770503312	0.0832591056930451	0.204524859292461	0.0496309945955463
211	2 vs. 24	1	0.934	0.9336	0.1261	0.875	0.3333	1	0.89884612244898	0.903832	0.13500693877551	0.853011102040816	0.389999673469388	1	0.102650607765256	0.100856964519843	0.0636681222951117	0.130103373143979	0.0423790449114384
212	2 vs. 24	2	0.9864	0.9816	0.0793	0.9333	0.375	2	0.98733412244898	0.985032326530612	0.0720954285714286	0.92485012244898	0.374998775510204	2	0.0100464514953486	0.0123890461273489	0.0270997599415362	0.0467822755882719	0.0481111504828868
213	2 vs. 24	3	0.3965	0.3768	0.3242	0.5833	0.5	3	0.755337551020408	0.757762775510204	0.185275510204082	0.653356163265306	0.506666612244898	3	0.215412445918853	0.212311770503312	0.0832591056930451	0.204524859292461	0.0496309945955463
214	2 vs. 25	1	0.9327	0.9327	0.1237	0.875	0.3333	1	0.89884612244898	0.903832	0.13500693877551	0.853011102040816	0.389999673469388	1	0.102650607765256	0.100856964519843	0.0636681222951117	0.130103373143979	0.0423790449114384
215	2 vs. 25	2	0.9844	0.9809	0.0858	0.9333	0.375	2	0.98733412244898	0.985032326530612	0.0720954285714286	0.92485012244898	0.374998775510204	2	0.0100464514953486	0.0123890461273489	0.0270997599415362	0.0467822755882719	0.0481111504828868
216	2 vs. 25	3	0.858	0.8593	0.1453	0.8696	0.5208	3	0.755337551020408	0.757762775510204	0.185275510204082	0.653356163265306	0.506666612244898	3	0.215412445918853	0.212311770503312	0.0832591056930451	0.204524859292461	0.0496309945955463
217	2 vs. 26	1	0.9733	0.9734	0.0795	0.9091	0.3125	1	0.89884612244898	0.903832	0.13500693877551	0.853011102040816	0.389999673469388	1	0.102650607765256	0.100856964519843	0.0636681222951117	0.130103373143979	0.0423790449114384
218	2 vs. 26	2	0.9929	0.9905	0.0571	0.9286	0.4167	2	0.98733412244898	0.985032326530612	0.0720954285714286	0.92485012244898	0.374998775510204	2	0.0100464514953486	0.0123890461273489	0.0270997599415362	0.0467822755882719	0.0481111504828868
219	2 vs. 26	3	0.7195	0.7307	0.2109	0.75	0.5	3	0.755337551020408	0.757762775510204	0.185275510204082	0.653356163265306	0.506666612244898	3	0.215412445918853	0.212311770503312	0.0832591056930451	0.204524859292461	0.0496309945955463
220	2 vs. 27	1	0.9734	0.977	0.0765	0.9714	0.2708	1	0.89884612244898	0.903832	0.13500693877551	0.853011102040816	0.389999673469388	1	0.102650607765256	0.100856964519843	0.0636681222951117	0.130103373143979	0.0423790449114384
221	2 vs. 27	2	0.9966	0.9955	0.0401	0.9286	0.4167	2	0.98733412244898	0.985032326530612	0.0720954285714286	0.92485012244898	0.374998775510204	2	0.0100464514953486	0.0123890461273489	0.0270997599415362	0.0467822755882719	0.0481111504828868
222	2 vs. 27	3	0.9783	0.9811	0.0577	0.8333	0.5	3	0.755337551020408	0.757762775510204	0.185275510204082	0.653356163265306	0.506666612244898	3	0.215412445918853	0.212311770503312	0.0832591056930451	0.204524859292461	0.0496309945955463
223	2 vs. 28	1	0.9484	0.949	0.1076	0.8276	0.3958	1	0.89884612244898	0.903832	0.13500693877551	0.853011102040816	0.389999673469388	1	0.102650607765256	0.100856964519843	0.0636681222951117	0.130103373143979	0.0423790449114384
224	2 vs. 28	2	0.9881	0.984	0.0747	0.9655	0.3958	2	0.98733412244898	0.985032326530612	0.0720954285714286	0.92485012244898	0.374998775510204	2	0.0100464514953486	0.0123890461273489	0.0270997599415362	0.0467822755882719	0.0481111504828868
225	2 vs. 28	3	0.8849	0.8859	0.1366	0.9167	0.5	3	0.755337551020408	0.757762775510204	0.185275510204082	0.653356163265306	0.506666612244898	3	0.215412445918853	0.212311770503312	0.0832591056930451	0.204524859292461	0.0496309945955463
226	2 vs. 29	1	0.9468	0.9498	0.1071	0.9032	0.3542	1	0.89884612244898	0.903832	0.13500693877551	0.853011102040816	0.389999673469388	1	0.102650607765256	0.100856964519843	0.0636681222951117	0.130103373143979	0.0423790449114384
227	2 vs. 29	2	0.9825	0.9786	0.0893	0.963	0.4375	2	0.98733412244898	0.985032326530612	0.0720954285714286	0.92485012244898	0.374998775510204	2	0.0100464514953486	0.0123890461273489	0.0270997599415362	0.0467822755882719	0.0481111504828868
228	2 vs. 29	3	0.8351	0.8418	0.167	0.88	0.4792	3	0.755337551020408	0.757762775510204	0.185275510204082	0.653356163265306	0.506666612244898	3	0.215412445918853	0.212311770503312	0.0832591056930451	0.204524859292461	0.0496309945955463
229	2 vs. 30	1	0.8809	0.8854	0.1657	0.7742	0.3542	1	0.89884612244898	0.903832	0.13500693877551	0.853011102040816	0.389999673469388	1	0.102650607765256	0.100856964519843	0.0636681222951117	0.130103373143979	0.0423790449114384
230	2 vs. 30	2	0.9817	0.9795	0.0932	0.9032	0.3542	2	0.98733412244898	0.985032326530612	0.0720954285714286	0.92485012244898	0.374998775510204	2	0.0100464514953486	0.0123890461273489	0.0270997599415362	0.0467822755882719	0.0481111504828868
231	2 vs. 30	3	0.1045	0.0786	0.369	0.1818	0.5417	3	0.755337551020408	0.757762775510204	0.185275510204082	0.653356163265306	0.506666612244898	3	0.215412445918853	0.212311770503312	0.0832591056930451	0.204524859292461	0.0496309945955463
232	2 vs. 31	1	0.9553	0.9555	0.0984	0.9032	0.3542	1	0.89884612244898	0.903832	0.13500693877551	0.853011102040816	0.389999673469388	1	0.102650607765256	0.100856964519843	0.0636681222951117	0.130103373143979	0.0423790449114384
233	2 vs. 31	2	0.9934	0.9914	0.0551	0.9286	0.4167	2	0.98733412244898	0.985032326530612	0.0720954285714286	0.92485012244898	0.374998775510204	2	0.0100464514953486	0.0123890461273489	0.0270997599415362	0.0467822755882719	0.0481111504828868
234	2 vs. 31	3	0.5089	0.5029	0.2899	0.5385	0.4583	3	0.755337551020408	0.757762775510204	0.185275510204082	0.653356163265306	0.506666612244898	3	0.215412445918853	0.212311770503312	0.0832591056930451	0.204524859292461	0.0496309945955463
235	2 vs. 32	1	0.8758	0.8812	0.1664	0.8387	0.3542	1	0.89884612244898	0.903832	0.13500693877551	0.853011102040816	0.389999673469388	1	0.102650607765256	0.100856964519843	0.0636681222951117	0.130103373143979	0.0423790449114384
236	2 vs. 32	2	0.9891	0.9869	0.0714	0.9333	0.375	2	0.98733412244898	0.985032326530612	0.0720954285714286	0.92485012244898	0.374998775510204	2	0.0100464514953486	0.0123890461273489	0.0270997599415362	0.0467822755882719	0.0481111504828868
237	2 vs. 32	3	0.7938	0.7918	0.1793	0.8	0.4792	3	0.755337551020408	0.757762775510204	0.185275510204082	0.653356163265306	0.506666612244898	3	0.215412445918853	0.212311770503312	0.0832591056930451	0.204524859292461	0.0496309945955463
238	2 vs. 33	1	0.8265	0.8384	0.1904	0.7857	0.4167	1	0.89884612244898	0.903832	0.13500693877551	0.853011102040816	0.389999673469388	1	0.102650607765256	0.100856964519843	0.0636681222951117	0.130103373143979	0.0423790449114384
239	2 vs. 33	2	0.9885	0.987	0.0726	0.963	0.4375	2	0.98733412244898	0.985032326530612	0.0720954285714286	0.92485012244898	0.374998775510204	2	0.0100464514953486	0.0123890461273489	0.0270997599415362	0.0467822755882719	0.0481111504828868
240	2 vs. 33	3	0.902	0.9021	0.122	0.8	0.4792	3	0.755337551020408	0.757762775510204	0.185275510204082	0.653356163265306	0.506666612244898	3	0.215412445918853	0.212311770503312	0.0832591056930451	0.204524859292461	0.0496309945955463
241	2 vs. 34	1	0.9115	0.9129	0.1421	0.9032	0.3542	1	0.89884612244898	0.903832	0.13500693877551	0.853011102040816	0.389999673469388	1	0.102650607765256	0.100856964519843	0.0636681222951117	0.130103373143979	0.0423790449114384
242	2 vs. 34	2	0.9936	0.9915	0.0542	0.9655	0.3958	2	0.98733412244898	0.985032326530612	0.0720954285714286	0.92485012244898	0.374998775510204	2	0.0100464514953486	0.0123890461273489	0.0270997599415362	0.0467822755882719	0.0481111504828868
243	2 vs. 34	3	0.7622	0.7707	0.195	0.8	0.4792	3	0.755337551020408	0.757762775510204	0.185275510204082	0.653356163265306	0.506666612244898	3	0.215412445918853	0.212311770503312	0.0832591056930451	0.204524859292461	0.0496309945955463
244	2 vs. 35	1	0.9298	0.9297	0.1269	0.9697	0.3125	1	0.89884612244898	0.903832	0.13500693877551	0.853011102040816	0.389999673469388	1	0.102650607765256	0.100856964519843	0.0636681222951117	0.130103373143979	0.0423790449114384
245	2 vs. 35	2	0.9896	0.9865	0.0707	0.9333	0.375	2	0.98733412244898	0.985032326530612	0.0720954285714286	0.92485012244898	0.374998775510204	2	0.0100464514953486	0.0123890461273489	0.0270997599415362	0.0467822755882719	0.0481111504828868
246	2 vs. 35	3	0.7746	0.7716	0.1911	0.8	0.4792	3	0.755337551020408	0.757762775510204	0.185275510204082	0.653356163265306	0.506666612244898	3	0.215412445918853	0.212311770503312	0.0832591056930451	0.204524859292461	0.0496309945955463
247	2 vs. 36	1	0.8987	0.9005	0.1526	0.8485	0.3125	1	0.89884612244898	0.903832	0.13500693877551	0.853011102040816	0.389999673469388	1	0.102650607765256	0.100856964519843	0.0636681222951117	0.130103373143979	0.0423790449114384
248	2 vs. 36	2	0.9832	0.9789	0.089	0.875	0.3333	2	0.98733412244898	0.985032326530612	0.0720954285714286	0.92485012244898	0.374998775510204	2	0.0100464514953486	0.0123890461273489	0.0270997599415362	0.0467822755882719	0.0481111504828868
249	2 vs. 36	3	0.4223	0.4053	0.3094	0.6087	0.5208	3	0.755337551020408	0.757762775510204	0.185275510204082	0.653356163265306	0.506666612244898	3	0.215412445918853	0.212311770503312	0.0832591056930451	0.204524859292461	0.0496309945955463
250	2 vs. 37	1	0.9722	0.9769	0.0782	0.9697	0.3125	1	0.89884612244898	0.903832	0.13500693877551	0.853011102040816	0.389999673469388	1	0.102650607765256	0.100856964519843	0.0636681222951117	0.130103373143979	0.0423790449114384
251	2 vs. 37	2	0.9925	0.9925	0.0586	0.963	0.4375	2	0.98733412244898	0.985032326530612	0.0720954285714286	0.92485012244898	0.374998775510204	2	0.0100464514953486	0.0123890461273489	0.0270997599415362	0.0467822755882719	0.0481111504828868
252	2 vs. 37	3	0.9096	0.9198	0.1196	1	0.4583	3	0.755337551020408	0.757762775510204	0.185275510204082	0.653356163265306	0.506666612244898	3	0.215412445918853	0.212311770503312	0.0832591056930451	0.204524859292461	0.0496309945955463
253	2 vs. 38	1	0.9638	0.9635	0.0899	0.875	0.3333	1	0.89884612244898	0.903832	0.13500693877551	0.853011102040816	0.389999673469388	1	0.102650607765256	0.100856964519843	0.0636681222951117	0.130103373143979	0.0423790449114384
254	2 vs. 38	2	0.9901	0.9876	0.0687	0.9032	0.3542	2	0.98733412244898	0.985032326530612	0.0720954285714286	0.92485012244898	0.374998775510204	2	0.0100464514953486	0.0123890461273489	0.0270997599415362	0.0467822755882719	0.0481111504828868
255	2 vs. 38	3	0.841	0.838	0.1555	0.8696	0.5208	3	0.755337551020408	0.757762775510204	0.185275510204082	0.653356163265306	0.506666612244898	3	0.215412445918853	0.212311770503312	0.0832591056930451	0.204524859292461	0.0496309945955463
256	2 vs. 39	1	0.932	0.9322	0.1221	0.875	0.3333	1	0.89884612244898	0.903832	0.13500693877551	0.853011102040816	0.389999673469388	1	0.102650607765256	0.100856964519843	0.0636681222951117	0.130103373143979	0.0423790449114384
257	2 vs. 39	2	0.985	0.9798	0.0843	0.9333	0.375	2	0.98733412244898	0.985032326530612	0.0720954285714286	0.92485012244898	0.374998775510204	2	0.0100464514953486	0.0123890461273489	0.0270997599415362	0.0467822755882719	0.0481111504828868
258	2 vs. 39	3	0.0139	0.0507	0.4077	0.3333	0.5	3	0.755337551020408	0.757762775510204	0.185275510204082	0.653356163265306	0.506666612244898	3	0.215412445918853	0.212311770503312	0.0832591056930451	0.204524859292461	0.0496309945955463
259	2 vs. 40	1	0.852	0.8633	0.1862	0.8125	0.3333	1	0.89884612244898	0.903832	0.13500693877551	0.853011102040816	0.389999673469388	1	0.102650607765256	0.100856964519843	0.0636681222951117	0.130103373143979	0.0423790449114384
260	2 vs. 40	2	0.982	0.9799	0.0923	0.875	0.3333	2	0.98733412244898	0.985032326530612	0.0720954285714286	0.92485012244898	0.374998775510204	2	0.0100464514953486	0.0123890461273489	0.0270997599415362	0.0467822755882719	0.0481111504828868
261	2 vs. 40	3	0.6303	0.63	0.2514	0.6667	0.5	3	0.755337551020408	0.757762775510204	0.185275510204082	0.653356163265306	0.506666612244898	3	0.215412445918853	0.212311770503312	0.0832591056930451	0.204524859292461	0.0496309945955463
262	2 vs. 41	1	0.9269	0.9288	0.1299	0.875	0.3333	1	0.89884612244898	0.903832	0.13500693877551	0.853011102040816	0.389999673469388	1	0.102650607765256	0.100856964519843	0.0636681222951117	0.130103373143979	0.0423790449114384
263	2 vs. 41	2	0.9904	0.9881	0.0671	0.9655	0.3958	2	0.98733412244898	0.985032326530612	0.0720954285714286	0.92485012244898	0.374998775510204	2	0.0100464514953486	0.0123890461273489	0.0270997599415362	0.0467822755882719	0.0481111504828868
264	2 vs. 41	3	0.7031	0.7039	0.2227	0.6667	0.4375	3	0.755337551020408	0.757762775510204	0.185275510204082	0.653356163265306	0.506666612244898	3	0.215412445918853	0.212311770503312	0.0832591056930451	0.204524859292461	0.0496309945955463
265	2 vs. 42	1	0.957	0.9567	0.0967	0.8667	0.375	1	0.89884612244898	0.903832	0.13500693877551	0.853011102040816	0.389999673469388	1	0.102650607765256	0.100856964519843	0.0636681222951117	0.130103373143979	0.0423790449114384
266	2 vs. 42	2	0.9886	0.9848	0.0722	0.9286	0.4167	2	0.98733412244898	0.985032326530612	0.0720954285714286	0.92485012244898	0.374998775510204	2	0.0100464514953486	0.0123890461273489	0.0270997599415362	0.0467822755882719	0.0481111504828868
267	2 vs. 42	3	0.6333	0.6262	0.2374	0.6667	0.5	3	0.755337551020408	0.757762775510204	0.185275510204082	0.653356163265306	0.506666612244898	3	0.215412445918853	0.212311770503312	0.0832591056930451	0.204524859292461	0.0496309945955463
268	2 vs. 43	1	0.9491	0.9492	0.107	0.9032	0.3542	1	0.89884612244898	0.903832	0.13500693877551	0.853011102040816	0.389999673469388	1	0.102650607765256	0.100856964519843	0.0636681222951117	0.130103373143979	0.0423790449114384
269	2 vs. 43	2	0.9877	0.9837	0.077	0.9333	0.375	2	0.98733412244898	0.985032326530612	0.0720954285714286	0.92485012244898	0.374998775510204	2	0.0100464514953486	0.0123890461273489	0.0270997599415362	0.0467822755882719	0.0481111504828868
270	2 vs. 43	3	0.6374	0.6426	0.2449	0.7692	0.4583	3	0.755337551020408	0.757762775510204	0.185275510204082	0.653356163265306	0.506666612244898	3	0.215412445918853	0.212311770503312	0.0832591056930451	0.204524859292461	0.0496309945955463
271	2 vs. 44	1	0.8281	0.8304	0.1866	0.7143	0.4167	1	0.89884612244898	0.903832	0.13500693877551	0.853011102040816	0.389999673469388	1	0.102650607765256	0.100856964519843	0.0636681222951117	0.130103373143979	0.0423790449114384
272	2 vs. 44	2	0.9908	0.9878	0.0655	0.963	0.4375	2	0.98733412244898	0.985032326530612	0.0720954285714286	0.92485012244898	0.374998775510204	2	0.0100464514953486	0.0123890461273489	0.0270997599415362	0.0467822755882719	0.0481111504828868
273	2 vs. 44	3	0.6622	0.6613	0.2336	0.6667	0.4375	3	0.755337551020408	0.757762775510204	0.185275510204082	0.653356163265306	0.506666612244898	3	0.215412445918853	0.212311770503312	0.0832591056930451	0.204524859292461	0.0496309945955463
274	2 vs. 45	1	0.9398	0.9427	0.1191	0.9375	0.3333	1	0.89884612244898	0.903832	0.13500693877551	0.853011102040816	0.389999673469388	1	0.102650607765256	0.100856964519843	0.0636681222951117	0.130103373143979	0.0423790449114384
275	2 vs. 45	2	0.9906	0.9883	0.0665	0.9032	0.3542	2	0.98733412244898	0.985032326530612	0.0720954285714286	0.92485012244898	0.374998775510204	2	0.0100464514953486	0.0123890461273489	0.0270997599415362	0.0467822755882719	0.0481111504828868
276	2 vs. 45	3	0.4167	0.416	0.3217	0.6957	0.5208	3	0.755337551020408	0.757762775510204	0.185275510204082	0.653356163265306	0.506666612244898	3	0.215412445918853	0.212311770503312	0.0832591056930451	0.204524859292461	0.0496309945955463
277	2 vs. 46	1	0.8838	0.8831	0.1551	0.9375	0.3333	1	0.89884612244898	0.903832	0.13500693877551	0.853011102040816	0.389999673469388	1	0.102650607765256	0.100856964519843	0.0636681222951117	0.130103373143979	0.0423790449114384
278	2 vs. 46	2	0.9845	0.979	0.0841	0.8966	0.3958	2	0.98733412244898	0.985032326530612	0.0720954285714286	0.92485012244898	0.374998775510204	2	0.0100464514953486	0.0123890461273489	0.0270997599415362	0.0467822755882719	0.0481111504828868
279	2 vs. 46	3	0.8758	0.9018	0.1364	0.6364	0.5417	3	0.755337551020408	0.757762775510204	0.185275510204082	0.653356163265306	0.506666612244898	3	0.215412445918853	0.212311770503312	0.0832591056930451	0.204524859292461	0.0496309945955463
280	2 vs. 47	1	0.9567	0.957	0.0998	0.9412	0.2917	1	0.89884612244898	0.903832	0.13500693877551	0.853011102040816	0.389999673469388	1	0.102650607765256	0.100856964519843	0.0636681222951117	0.130103373143979	0.0423790449114384
281	2 vs. 47	2	0.9913	0.9885	0.0641	0.9333	0.375	2	0.98733412244898	0.985032326530612	0.0720954285714286	0.92485012244898	0.374998775510204	2	0.0100464514953486	0.0123890461273489	0.0270997599415362	0.0467822755882719	0.0481111504828868
282	2 vs. 47	3	0.5684	0.5713	0.2686	0.64	0.4792	3	0.755337551020408	0.757762775510204	0.185275510204082	0.653356163265306	0.506666612244898	3	0.215412445918853	0.212311770503312	0.0832591056930451	0.204524859292461	0.0496309945955463
283	2 vs. 48	1	0.9814	0.9813	0.0635	0.9091	0.3125	1	0.89884612244898	0.903832	0.13500693877551	0.853011102040816	0.389999673469388	1	0.102650607765256	0.100856964519843	0.0636681222951117	0.130103373143979	0.0423790449114384
284	2 vs. 48	2	0.9897	0.9861	0.0686	0.963	0.4375	2	0.98733412244898	0.985032326530612	0.0720954285714286	0.92485012244898	0.374998775510204	2	0.0100464514953486	0.0123890461273489	0.0270997599415362	0.0467822755882719	0.0481111504828868
285	2 vs. 48	3	0.5484	0.5511	0.2598	0.5	0.5833	3	0.755337551020408	0.757762775510204	0.185275510204082	0.653356163265306	0.506666612244898	3	0.215412445918853	0.212311770503312	0.0832591056930451	0.204524859292461	0.0496309945955463
286	2 vs. 49	1	0.9111	0.9117	0.1461	0.875	0.3333	1	0.89884612244898	0.903832	0.13500693877551	0.853011102040816	0.389999673469388	1	0.102650607765256	0.100856964519843	0.0636681222951117	0.130103373143979	0.0423790449114384
287	2 vs. 49	2	0.9862	0.9818	0.0812	0.9333	0.375	2	0.98733412244898	0.985032326530612	0.0720954285714286	0.92485012244898	0.374998775510204	2	0.0100464514953486	0.0123890461273489	0.0270997599415362	0.0467822755882719	0.0481111504828868
288	2 vs. 49	3	0.5671	0.5747	0.2747	0.6667	0.5	3	0.755337551020408	0.757762775510204	0.185275510204082	0.653356163265306	0.506666612244898	3	0.215412445918853	0.212311770503312	0.0832591056930451	0.204524859292461	0.0496309945955463
289	2 vs. 50	1	0.9192	0.9328	0.1321	0.9375	0.3333	1	0.89884612244898	0.903832	0.13500693877551	0.853011102040816	0.389999673469388	1	0.102650607765256	0.100856964519843	0.0636681222951117	0.130103373143979	0.0423790449114384
290	2 vs. 50	2	0.9846	0.9809	0.084	0.963	0.4375	2	0.98733412244898	0.985032326530612	0.0720954285714286	0.92485012244898	0.374998775510204	2	0.0100464514953486	0.0123890461273489	0.0270997599415362	0.0467822755882719	0.0481111504828868
291	2 vs. 50	3	0.8336	0.8317	0.1634	0.8571	0.4167	3	0.755337551020408	0.757762775510204	0.185275510204082	0.653356163265306	0.506666612244898	3	0.215412445918853	0.212311770503312	0.0832591056930451	0.204524859292461	0.0496309945955463
292	3 vs. 4	1	0.9738	0.9764	0.077	0.9655	0.3958	1	0.89884612244898	0.903832	0.13500693877551	0.853011102040816	0.389999673469388	1	0.102650607765256	0.100856964519843	0.0636681222951117	0.130103373143979	0.0423790449114384
293	3 vs. 4	2	0.9892	0.9847	0.0719	0.8966	0.3958	2	0.98733412244898	0.985032326530612	0.0720954285714286	0.92485012244898	0.374998775510204	2	0.0100464514953486	0.0123890461273489	0.0270997599415362	0.0467822755882719	0.0481111504828868
294	3 vs. 4	3	0.029	0.0373	0.4005	0	0.4792	3	0.755337551020408	0.757762775510204	0.185275510204082	0.653356163265306	0.506666612244898	3	0.215412445918853	0.212311770503312	0.0832591056930451	0.204524859292461	0.0496309945955463
295	3 vs. 5	1	0.9533	0.9584	0.1023	0.8571	0.4167	1	0.89884612244898	0.903832	0.13500693877551	0.853011102040816	0.389999673469388	1	0.102650607765256	0.100856964519843	0.0636681222951117	0.130103373143979	0.0423790449114384
296	3 vs. 5	2	0.9971	0.9959	0.0379	0.9375	0.3333	2	0.98733412244898	0.985032326530612	0.0720954285714286	0.92485012244898	0.374998775510204	2	0.0100464514953486	0.0123890461273489	0.0270997599415362	0.0467822755882719	0.0481111504828868
297	3 vs. 5	3	0.968	0.9735	0.0733	0.9333	0.375	3	0.755337551020408	0.757762775510204	0.185275510204082	0.653356163265306	0.506666612244898	3	0.215412445918853	0.212311770503312	0.0832591056930451	0.204524859292461	0.0496309945955463
298	3 vs. 6	1	0.9472	0.9614	0.111	0.9333	0.375	1	0.89884612244898	0.903832	0.13500693877551	0.853011102040816	0.389999673469388	1	0.102650607765256	0.100856964519843	0.0636681222951117	0.130103373143979	0.0423790449114384
299	3 vs. 6	2	0.996	0.9944	0.0439	1	0.375	2	0.98733412244898	0.985032326530612	0.0720954285714286	0.92485012244898	0.374998775510204	2	0.0100464514953486	0.0123890461273489	0.0270997599415362	0.0467822755882719	0.0481111504828868
300	3 vs. 6	3	0.1408	0.169	0.3843	0.1667	0.5	3	0.755337551020408	0.757762775510204	0.185275510204082	0.653356163265306	0.506666612244898	3	0.215412445918853	0.212311770503312	0.0832591056930451	0.204524859292461	0.0496309945955463
301	3 vs. 7	1	0.9651	0.9671	0.0889	0.9655	0.3958	1	0.89884612244898	0.903832	0.13500693877551	0.853011102040816	0.389999673469388	1	0.102650607765256	0.100856964519843	0.0636681222951117	0.130103373143979	0.0423790449114384
302	3 vs. 7	2	0.9943	0.9919	0.0526	0.9286	0.4167	2	0.98733412244898	0.985032326530612	0.0720954285714286	0.92485012244898	0.374998775510204	2	0.0100464514953486	0.0123890461273489	0.0270997599415362	0.0467822755882719	0.0481111504828868
303	3 vs. 7	3	0.651	0.6873	0.2388	0.4444	0.4375	3	0.755337551020408	0.757762775510204	0.185275510204082	0.653356163265306	0.506666612244898	3	0.215412445918853	0.212311770503312	0.0832591056930451	0.204524859292461	0.0496309945955463
304	3 vs. 8	1	0.8709	0.8789	0.1667	0.8571	0.4167	1	0.89884612244898	0.903832	0.13500693877551	0.853011102040816	0.389999673469388	1	0.102650607765256	0.100856964519843	0.0636681222951117	0.130103373143979	0.0423790449114384
305	3 vs. 8	2	0.978	0.9713	0.102	0.8966	0.3958	2	0.98733412244898	0.985032326530612	0.0720954285714286	0.92485012244898	0.374998775510204	2	0.0100464514953486	0.0123890461273489	0.0270997599415362	0.0467822755882719	0.0481111504828868
306	3 vs. 8	3	0.3705	0.417	0.3213	0.3077	0.4583	3	0.755337551020408	0.757762775510204	0.185275510204082	0.653356163265306	0.506666612244898	3	0.215412445918853	0.212311770503312	0.0832591056930451	0.204524859292461	0.0496309945955463
307	3 vs. 9	1	0.8925	0.8944	0.1536	0.8571	0.4167	1	0.89884612244898	0.903832	0.13500693877551	0.853011102040816	0.389999673469388	1	0.102650607765256	0.100856964519843	0.0636681222951117	0.130103373143979	0.0423790449114384
308	3 vs. 9	2	0.9798	0.9715	0.0977	0.9286	0.4167	2	0.98733412244898	0.985032326530612	0.0720954285714286	0.92485012244898	0.374998775510204	2	0.0100464514953486	0.0123890461273489	0.0270997599415362	0.0467822755882719	0.0481111504828868
309	3 vs. 9	3	0.9094	0.9146	0.1191	0.6667	0.4375	3	0.755337551020408	0.757762775510204	0.185275510204082	0.653356163265306	0.506666612244898	3	0.215412445918853	0.212311770503312	0.0832591056930451	0.204524859292461	0.0496309945955463
310	3 vs. 10	1	0.9414	0.9414	0.1142	0.8966	0.3958	1	0.89884612244898	0.903832	0.13500693877551	0.853011102040816	0.389999673469388	1	0.102650607765256	0.100856964519843	0.0636681222951117	0.130103373143979	0.0423790449114384
311	3 vs. 10	2	0.9929	0.99	0.0582	0.9286	0.4167	2	0.98733412244898	0.985032326530612	0.0720954285714286	0.92485012244898	0.374998775510204	2	0.0100464514953486	0.0123890461273489	0.0270997599415362	0.0467822755882719	0.0481111504828868
312	3 vs. 10	3	0.857	0.8972	0.1507	0.8148	0.4375	3	0.755337551020408	0.757762775510204	0.185275510204082	0.653356163265306	0.506666612244898	3	0.215412445918853	0.212311770503312	0.0832591056930451	0.204524859292461	0.0496309945955463
313	3 vs. 11	1	0.9852	0.9906	0.0583	0.9333	0.375	1	0.89884612244898	0.903832	0.13500693877551	0.853011102040816	0.389999673469388	1	0.102650607765256	0.100856964519843	0.0636681222951117	0.130103373143979	0.0423790449114384
314	3 vs. 11	2	0.9932	0.9913	0.0575	0.8966	0.3958	2	0.98733412244898	0.985032326530612	0.0720954285714286	0.92485012244898	0.374998775510204	2	0.0100464514953486	0.0123890461273489	0.0270997599415362	0.0467822755882719	0.0481111504828868
315	3 vs. 11	3	0.511	0.5659	0.2887	0.3571	0.4167	3	0.755337551020408	0.757762775510204	0.185275510204082	0.653356163265306	0.506666612244898	3	0.215412445918853	0.212311770503312	0.0832591056930451	0.204524859292461	0.0496309945955463
316	3 vs. 12	1	0.9282	0.9498	0.1313	0.8276	0.3958	1	0.89884612244898	0.903832	0.13500693877551	0.853011102040816	0.389999673469388	1	0.102650607765256	0.100856964519843	0.0636681222951117	0.130103373143979	0.0423790449114384
317	3 vs. 12	2	0.9942	0.9976	0.0524	0.9375	0.3333	2	0.98733412244898	0.985032326530612	0.0720954285714286	0.92485012244898	0.374998775510204	2	0.0100464514953486	0.0123890461273489	0.0270997599415362	0.0467822755882719	0.0481111504828868
318	3 vs. 12	3	0.6571	0.703	0.2422	0.5185	0.4375	3	0.755337551020408	0.757762775510204	0.185275510204082	0.653356163265306	0.506666612244898	3	0.215412445918853	0.212311770503312	0.0832591056930451	0.204524859292461	0.0496309945955463
319	3 vs. 13	1	0.8318	0.8382	0.1899	0.8387	0.3542	1	0.89884612244898	0.903832	0.13500693877551	0.853011102040816	0.389999673469388	1	0.102650607765256	0.100856964519843	0.0636681222951117	0.130103373143979	0.0423790449114384
320	3 vs. 13	2	0.981	0.9774	0.095	0.8571	0.4167	2	0.98733412244898	0.985032326530612	0.0720954285714286	0.92485012244898	0.374998775510204	2	0.0100464514953486	0.0123890461273489	0.0270997599415362	0.0467822755882719	0.0481111504828868
321	3 vs. 13	3	0.2603	0.3049	0.3562	0.0769	0.4583	3	0.755337551020408	0.757762775510204	0.185275510204082	0.653356163265306	0.506666612244898	3	0.215412445918853	0.212311770503312	0.0832591056930451	0.204524859292461	0.0496309945955463
322	3 vs. 14	1	0.9599	0.9717	0.0959	0.8966	0.3958	1	0.89884612244898	0.903832	0.13500693877551	0.853011102040816	0.389999673469388	1	0.102650607765256	0.100856964519843	0.0636681222951117	0.130103373143979	0.0423790449114384
323	3 vs. 14	2	0.9953	0.9942	0.0474	1	0.375	2	0.98733412244898	0.985032326530612	0.0720954285714286	0.92485012244898	0.374998775510204	2	0.0100464514953486	0.0123890461273489	0.0270997599415362	0.0467822755882719	0.0481111504828868
324	3 vs. 14	3	0.724	0.8155	0.2105	0.6154	0.4583	3	0.755337551020408	0.757762775510204	0.185275510204082	0.653356163265306	0.506666612244898	3	0.215412445918853	0.212311770503312	0.0832591056930451	0.204524859292461	0.0496309945955463
325	3 vs. 15	1	0.9701	0.9813	0.0822	0.9032	0.3542	1	0.89884612244898	0.903832	0.13500693877551	0.853011102040816	0.389999673469388	1	0.102650607765256	0.100856964519843	0.0636681222951117	0.130103373143979	0.0423790449114384
326	3 vs. 15	2	0.994	0.9925	0.0538	0.9333	0.375	2	0.98733412244898	0.985032326530612	0.0720954285714286	0.92485012244898	0.374998775510204	2	0.0100464514953486	0.0123890461273489	0.0270997599415362	0.0467822755882719	0.0481111504828868
327	3 vs. 15	3	0.7309	0.8098	0.2093	0.6667	0.4375	3	0.755337551020408	0.757762775510204	0.185275510204082	0.653356163265306	0.506666612244898	3	0.215412445918853	0.212311770503312	0.0832591056930451	0.204524859292461	0.0496309945955463
328	3 vs. 16	1	0.9753	0.9759	0.0748	0.8571	0.4167	1	0.89884612244898	0.903832	0.13500693877551	0.853011102040816	0.389999673469388	1	0.102650607765256	0.100856964519843	0.0636681222951117	0.130103373143979	0.0423790449114384
329	3 vs. 16	2	0.9931	0.9916	0.0578	0.8966	0.3958	2	0.98733412244898	0.985032326530612	0.0720954285714286	0.92485012244898	0.374998775510204	2	0.0100464514953486	0.0123890461273489	0.0270997599415362	0.0467822755882719	0.0481111504828868
330	3 vs. 16	3	0.9494	0.9496	0.0888	0.8571	0.4167	3	0.755337551020408	0.757762775510204	0.185275510204082	0.653356163265306	0.506666612244898	3	0.215412445918853	0.212311770503312	0.0832591056930451	0.204524859292461	0.0496309945955463
331	3 vs. 17	1	0.9578	0.9664	0.0984	0.9333	0.375	1	0.89884612244898	0.903832	0.13500693877551	0.853011102040816	0.389999673469388	1	0.102650607765256	0.100856964519843	0.0636681222951117	0.130103373143979	0.0423790449114384
332	3 vs. 17	2	0.9948	0.9932	0.0499	0.9333	0.375	2	0.98733412244898	0.985032326530612	0.0720954285714286	0.92485012244898	0.374998775510204	2	0.0100464514953486	0.0123890461273489	0.0270997599415362	0.0467822755882719	0.0481111504828868
333	3 vs. 17	3	0.2707	0.3048	0.3605	0.24	0.4792	3	0.755337551020408	0.757762775510204	0.185275510204082	0.653356163265306	0.506666612244898	3	0.215412445918853	0.212311770503312	0.0832591056930451	0.204524859292461	0.0496309945955463
334	3 vs. 18	1	0.9892	0.9894	0.05	0.9677	0.3542	1	0.89884612244898	0.903832	0.13500693877551	0.853011102040816	0.389999673469388	1	0.102650607765256	0.100856964519843	0.0636681222951117	0.130103373143979	0.0423790449114384
335	3 vs. 18	2	0.9978	0.997	0.033	1	0.375	2	0.98733412244898	0.985032326530612	0.0720954285714286	0.92485012244898	0.374998775510204	2	0.0100464514953486	0.0123890461273489	0.0270997599415362	0.0467822755882719	0.0481111504828868
336	3 vs. 18	3	0.607	0.6214	0.2442	0.4444	0.4375	3	0.755337551020408	0.757762775510204	0.185275510204082	0.653356163265306	0.506666612244898	3	0.215412445918853	0.212311770503312	0.0832591056930451	0.204524859292461	0.0496309945955463
337	3 vs. 19	1	0.957	0.9623	0.0983	0.9677	0.3542	1	0.89884612244898	0.903832	0.13500693877551	0.853011102040816	0.389999673469388	1	0.102650607765256	0.100856964519843	0.0636681222951117	0.130103373143979	0.0423790449114384
338	3 vs. 19	2	0.9947	0.9933	0.0503	1	0.375	2	0.98733412244898	0.985032326530612	0.0720954285714286	0.92485012244898	0.374998775510204	2	0.0100464514953486	0.0123890461273489	0.0270997599415362	0.0467822755882719	0.0481111504828868
339	3 vs. 19	3	0.6601	0.7148	0.226	0.4286	0.4167	3	0.755337551020408	0.757762775510204	0.185275510204082	0.653356163265306	0.506666612244898	3	0.215412445918853	0.212311770503312	0.0832591056930451	0.204524859292461	0.0496309945955463
340	3 vs. 20	1	0.9897	0.9902	0.0494	0.8889	0.4375	1	0.89884612244898	0.903832	0.13500693877551	0.853011102040816	0.389999673469388	1	0.102650607765256	0.100856964519843	0.0636681222951117	0.130103373143979	0.0423790449114384
341	3 vs. 20	2	0.9927	0.9899	0.0595	0.9286	0.4167	2	0.98733412244898	0.985032326530612	0.0720954285714286	0.92485012244898	0.374998775510204	2	0.0100464514953486	0.0123890461273489	0.0270997599415362	0.0467822755882719	0.0481111504828868
342	3 vs. 20	3	0.4792	0.5061	0.2921	0.25	0.5	3	0.755337551020408	0.757762775510204	0.185275510204082	0.653356163265306	0.506666612244898	3	0.215412445918853	0.212311770503312	0.0832591056930451	0.204524859292461	0.0496309945955463
343	3 vs. 21	1	0.9116	0.9415	0.1424	0.9333	0.375	1	0.89884612244898	0.903832	0.13500693877551	0.853011102040816	0.389999673469388	1	0.102650607765256	0.100856964519843	0.0636681222951117	0.130103373143979	0.0423790449114384
344	3 vs. 21	2	0.9819	0.9881	0.093	0.8824	0.2917	2	0.98733412244898	0.985032326530612	0.0720954285714286	0.92485012244898	0.374998775510204	2	0.0100464514953486	0.0123890461273489	0.0270997599415362	0.0467822755882719	0.0481111504828868
345	3 vs. 21	3	0.8635	0.8636	0.1411	0.6154	0.4583	3	0.755337551020408	0.757762775510204	0.185275510204082	0.653356163265306	0.506666612244898	3	0.215412445918853	0.212311770503312	0.0832591056930451	0.204524859292461	0.0496309945955463
346	3 vs. 22	1	0.9833	0.985	0.0617	0.9655	0.3958	1	0.89884612244898	0.903832	0.13500693877551	0.853011102040816	0.389999673469388	1	0.102650607765256	0.100856964519843	0.0636681222951117	0.130103373143979	0.0423790449114384
347	3 vs. 22	2	0.9973	0.9962	0.037	0.9677	0.3542	2	0.98733412244898	0.985032326530612	0.0720954285714286	0.92485012244898	0.374998775510204	2	0.0100464514953486	0.0123890461273489	0.0270997599415362	0.0467822755882719	0.0481111504828868
348	3 vs. 22	3	0.5378	0.5572	0.2702	0.32	0.4792	3	0.755337551020408	0.757762775510204	0.185275510204082	0.653356163265306	0.506666612244898	3	0.215412445918853	0.212311770503312	0.0832591056930451	0.204524859292461	0.0496309945955463
349	3 vs. 23	1	0.9647	0.97	0.0891	0.9375	0.3333	1	0.89884612244898	0.903832	0.13500693877551	0.853011102040816	0.389999673469388	1	0.102650607765256	0.100856964519843	0.0636681222951117	0.130103373143979	0.0423790449114384
350	3 vs. 23	2	0.9953	0.9934	0.0476	0.9286	0.4167	2	0.98733412244898	0.985032326530612	0.0720954285714286	0.92485012244898	0.374998775510204	2	0.0100464514953486	0.0123890461273489	0.0270997599415362	0.0467822755882719	0.0481111504828868
351	3 vs. 23	3	0.6226	0.681	0.2491	0.4615	0.4583	3	0.755337551020408	0.757762775510204	0.185275510204082	0.653356163265306	0.506666612244898	3	0.215412445918853	0.212311770503312	0.0832591056930451	0.204524859292461	0.0496309945955463
352	3 vs. 24	1	0.969	0.9781	0.0873	0.9333	0.375	1	0.89884612244898	0.903832	0.13500693877551	0.853011102040816	0.389999673469388	1	0.102650607765256	0.100856964519843	0.0636681222951117	0.130103373143979	0.0423790449114384
353	3 vs. 24	2	0.9967	0.9958	0.04	0.9677	0.3542	2	0.98733412244898	0.985032326530612	0.0720954285714286	0.92485012244898	0.374998775510204	2	0.0100464514953486	0.0123890461273489	0.0270997599415362	0.0467822755882719	0.0481111504828868
354	3 vs. 24	3	0.3117	0.3528	0.3461	0.24	0.4792	3	0.755337551020408	0.757762775510204	0.185275510204082	0.653356163265306	0.506666612244898	3	0.215412445918853	0.212311770503312	0.0832591056930451	0.204524859292461	0.0496309945955463
355	3 vs. 25	1	0.9724	0.976	0.08	0.9333	0.375	1	0.89884612244898	0.903832	0.13500693877551	0.853011102040816	0.389999673469388	1	0.102650607765256	0.100856964519843	0.0636681222951117	0.130103373143979	0.0423790449114384
356	3 vs. 25	2	0.9904	0.9921	0.0676	0.9677	0.3542	2	0.98733412244898	0.985032326530612	0.0720954285714286	0.92485012244898	0.374998775510204	2	0.0100464514953486	0.0123890461273489	0.0270997599415362	0.0467822755882719	0.0481111504828868
357	3 vs. 25	3	0.8687	0.8718	0.1398	0.75	0.5	3	0.755337551020408	0.757762775510204	0.185275510204082	0.653356163265306	0.506666612244898	3	0.215412445918853	0.212311770503312	0.0832591056930451	0.204524859292461	0.0496309945955463
358	3 vs. 26	1	0.9765	0.986	0.0744	0.9032	0.3542	1	0.89884612244898	0.903832	0.13500693877551	0.853011102040816	0.389999673469388	1	0.102650607765256	0.100856964519843	0.0636681222951117	0.130103373143979	0.0423790449114384
359	3 vs. 26	2	0.9947	0.9936	0.0504	0.8966	0.3958	2	0.98733412244898	0.985032326530612	0.0720954285714286	0.92485012244898	0.374998775510204	2	0.0100464514953486	0.0123890461273489	0.0270997599415362	0.0467822755882719	0.0481111504828868
360	3 vs. 26	3	0.6431	0.7084	0.2379	0.4	0.4792	3	0.755337551020408	0.757762775510204	0.185275510204082	0.653356163265306	0.506666612244898	3	0.215412445918853	0.212311770503312	0.0832591056930451	0.204524859292461	0.0496309945955463
361	3 vs. 27	1	0.9418	0.9421	0.1146	0.9091	0.3125	1	0.89884612244898	0.903832	0.13500693877551	0.853011102040816	0.389999673469388	1	0.102650607765256	0.100856964519843	0.0636681222951117	0.130103373143979	0.0423790449114384
362	3 vs. 27	2	0.9915	0.9886	0.0635	0.9655	0.3958	2	0.98733412244898	0.985032326530612	0.0720954285714286	0.92485012244898	0.374998775510204	2	0.0100464514953486	0.0123890461273489	0.0270997599415362	0.0467822755882719	0.0481111504828868
363	3 vs. 27	3	0.8786	0.8816	0.135	0.72	0.4792	3	0.755337551020408	0.757762775510204	0.185275510204082	0.653356163265306	0.506666612244898	3	0.215412445918853	0.212311770503312	0.0832591056930451	0.204524859292461	0.0496309945955463
364	3 vs. 28	1	0.9733	0.9759	0.0782	0.8889	0.4375	1	0.89884612244898	0.903832	0.13500693877551	0.853011102040816	0.389999673469388	1	0.102650607765256	0.100856964519843	0.0636681222951117	0.130103373143979	0.0423790449114384
365	3 vs. 28	2	0.9964	0.9954	0.0415	1	0.375	2	0.98733412244898	0.985032326530612	0.0720954285714286	0.92485012244898	0.374998775510204	2	0.0100464514953486	0.0123890461273489	0.0270997599415362	0.0467822755882719	0.0481111504828868
366	3 vs. 28	3	0.8527	0.8836	0.1544	0.72	0.4792	3	0.755337551020408	0.757762775510204	0.185275510204082	0.653356163265306	0.506666612244898	3	0.215412445918853	0.212311770503312	0.0832591056930451	0.204524859292461	0.0496309945955463
367	3 vs. 29	1	0.965	0.9655	0.0888	0.9655	0.3958	1	0.89884612244898	0.903832	0.13500693877551	0.853011102040816	0.389999673469388	1	0.102650607765256	0.100856964519843	0.0636681222951117	0.130103373143979	0.0423790449114384
368	3 vs. 29	2	0.982	0.9747	0.0924	0.9286	0.4167	2	0.98733412244898	0.985032326530612	0.0720954285714286	0.92485012244898	0.374998775510204	2	0.0100464514953486	0.0123890461273489	0.0270997599415362	0.0467822755882719	0.0481111504828868
369	3 vs. 29	3	0.7548	0.8013	0.2031	0.6923	0.4583	3	0.755337551020408	0.757762775510204	0.185275510204082	0.653356163265306	0.506666612244898	3	0.215412445918853	0.212311770503312	0.0832591056930451	0.204524859292461	0.0496309945955463
370	3 vs. 30	1	0.9145	0.9407	0.1417	0.8276	0.3958	1	0.89884612244898	0.903832	0.13500693877551	0.853011102040816	0.389999673469388	1	0.102650607765256	0.100856964519843	0.0636681222951117	0.130103373143979	0.0423790449114384
371	3 vs. 30	2	0.9905	0.9954	0.0675	0.9375	0.3333	2	0.98733412244898	0.985032326530612	0.0720954285714286	0.92485012244898	0.374998775510204	2	0.0100464514953486	0.0123890461273489	0.0270997599415362	0.0467822755882719	0.0481111504828868
372	3 vs. 30	3	0.0036	0.008	0.3894	0	0.5208	3	0.755337551020408	0.757762775510204	0.185275510204082	0.653356163265306	0.506666612244898	3	0.215412445918853	0.212311770503312	0.0832591056930451	0.204524859292461	0.0496309945955463
373	3 vs. 31	1	0.9635	0.9746	0.0906	0.9655	0.3958	1	0.89884612244898	0.903832	0.13500693877551	0.853011102040816	0.389999673469388	1	0.102650607765256	0.100856964519843	0.0636681222951117	0.130103373143979	0.0423790449114384
374	3 vs. 31	2	0.9918	0.9911	0.0629	0.8966	0.3958	2	0.98733412244898	0.985032326530612	0.0720954285714286	0.92485012244898	0.374998775510204	2	0.0100464514953486	0.0123890461273489	0.0270997599415362	0.0467822755882719	0.0481111504828868
375	3 vs. 31	3	0.4303	0.4863	0.3121	0.2222	0.4375	3	0.755337551020408	0.757762775510204	0.185275510204082	0.653356163265306	0.506666612244898	3	0.215412445918853	0.212311770503312	0.0832591056930451	0.204524859292461	0.0496309945955463
376	3 vs. 32	1	0.8952	0.9234	0.1546	0.8966	0.3958	1	0.89884612244898	0.903832	0.13500693877551	0.853011102040816	0.389999673469388	1	0.102650607765256	0.100856964519843	0.0636681222951117	0.130103373143979	0.0423790449114384
377	3 vs. 32	2	0.9945	0.9971	0.0513	0.9677	0.3542	2	0.98733412244898	0.985032326530612	0.0720954285714286	0.92485012244898	0.374998775510204	2	0.0100464514953486	0.0123890461273489	0.0270997599415362	0.0467822755882719	0.0481111504828868
378	3 vs. 32	3	0.7821	0.8133	0.1844	0.6154	0.4583	3	0.755337551020408	0.757762775510204	0.185275510204082	0.653356163265306	0.506666612244898	3	0.215412445918853	0.212311770503312	0.0832591056930451	0.204524859292461	0.0496309945955463
379	3 vs. 33	1	0.8087	0.8094	0.2032	0.6923	0.4583	1	0.89884612244898	0.903832	0.13500693877551	0.853011102040816	0.389999673469388	1	0.102650607765256	0.100856964519843	0.0636681222951117	0.130103373143979	0.0423790449114384
380	3 vs. 33	2	0.9817	0.9742	0.0931	0.9286	0.4167	2	0.98733412244898	0.985032326530612	0.0720954285714286	0.92485012244898	0.374998775510204	2	0.0100464514953486	0.0123890461273489	0.0270997599415362	0.0467822755882719	0.0481111504828868
381	3 vs. 33	3	0.8445	0.87	0.1537	0.6154	0.4583	3	0.755337551020408	0.757762775510204	0.185275510204082	0.653356163265306	0.506666612244898	3	0.215412445918853	0.212311770503312	0.0832591056930451	0.204524859292461	0.0496309945955463
382	3 vs. 34	1	0.9403	0.9577	0.1178	0.9655	0.3958	1	0.89884612244898	0.903832	0.13500693877551	0.853011102040816	0.389999673469388	1	0.102650607765256	0.100856964519843	0.0636681222951117	0.130103373143979	0.0423790449114384
383	3 vs. 34	2	0.9964	0.9966	0.042	1	0.375	2	0.98733412244898	0.985032326530612	0.0720954285714286	0.92485012244898	0.374998775510204	2	0.0100464514953486	0.0123890461273489	0.0270997599415362	0.0467822755882719	0.0481111504828868
384	3 vs. 34	3	0.7384	0.7985	0.2045	0.6154	0.4583	3	0.755337551020408	0.757762775510204	0.185275510204082	0.653356163265306	0.506666612244898	3	0.215412445918853	0.212311770503312	0.0832591056930451	0.204524859292461	0.0496309945955463
385	3 vs. 35	1	0.953	0.9566	0.1047	0.9032	0.3542	1	0.89884612244898	0.903832	0.13500693877551	0.853011102040816	0.389999673469388	1	0.102650607765256	0.100856964519843	0.0636681222951117	0.130103373143979	0.0423790449114384
386	3 vs. 35	2	0.9947	0.9953	0.0504	0.9677	0.3542	2	0.98733412244898	0.985032326530612	0.0720954285714286	0.92485012244898	0.374998775510204	2	0.0100464514953486	0.0123890461273489	0.0270997599415362	0.0467822755882719	0.0481111504828868
387	3 vs. 35	3	0.6557	0.6818	0.2361	0.5385	0.4583	3	0.755337551020408	0.757762775510204	0.185275510204082	0.653356163265306	0.506666612244898	3	0.215412445918853	0.212311770503312	0.0832591056930451	0.204524859292461	0.0496309945955463
388	3 vs. 36	1	0.9368	0.9557	0.1217	0.9032	0.3542	1	0.89884612244898	0.903832	0.13500693877551	0.853011102040816	0.389999673469388	1	0.102650607765256	0.100856964519843	0.0636681222951117	0.130103373143979	0.0423790449114384
389	3 vs. 36	2	0.9911	0.9923	0.0652	0.9091	0.3125	2	0.98733412244898	0.985032326530612	0.0720954285714286	0.92485012244898	0.374998775510204	2	0.0100464514953486	0.0123890461273489	0.0270997599415362	0.0467822755882719	0.0481111504828868
390	3 vs. 36	3	0.3242	0.3657	0.3346	0.25	0.5	3	0.755337551020408	0.757762775510204	0.185275510204082	0.653356163265306	0.506666612244898	3	0.215412445918853	0.212311770503312	0.0832591056930451	0.204524859292461	0.0496309945955463
391	3 vs. 37	1	0.9728	0.9729	0.0785	0.9677	0.3542	1	0.89884612244898	0.903832	0.13500693877551	0.853011102040816	0.389999673469388	1	0.102650607765256	0.100856964519843	0.0636681222951117	0.130103373143979	0.0423790449114384
392	3 vs. 37	2	0.9921	0.9891	0.0617	0.9286	0.4167	2	0.98733412244898	0.985032326530612	0.0720954285714286	0.92485012244898	0.374998775510204	2	0.0100464514953486	0.0123890461273489	0.0270997599415362	0.0467822755882719	0.0481111504828868
393	3 vs. 37	3	0.8269	0.875	0.1655	0.8148	0.4375	3	0.755337551020408	0.757762775510204	0.185275510204082	0.653356163265306	0.506666612244898	3	0.215412445918853	0.212311770503312	0.0832591056930451	0.204524859292461	0.0496309945955463
394	3 vs. 38	1	0.9858	0.9928	0.057	0.9333	0.375	1	0.89884612244898	0.903832	0.13500693877551	0.853011102040816	0.389999673469388	1	0.102650607765256	0.100856964519843	0.0636681222951117	0.130103373143979	0.0423790449114384
395	3 vs. 38	2	0.996	0.9981	0.0439	0.9375	0.3333	2	0.98733412244898	0.985032326530612	0.0720954285714286	0.92485012244898	0.374998775510204	2	0.0100464514953486	0.0123890461273489	0.0270997599415362	0.0467822755882719	0.0481111504828868
396	3 vs. 38	3	0.7956	0.8058	0.1763	0.6667	0.5	3	0.755337551020408	0.757762775510204	0.185275510204082	0.653356163265306	0.506666612244898	3	0.215412445918853	0.212311770503312	0.0832591056930451	0.204524859292461	0.0496309945955463
397	3 vs. 39	1	0.9767	0.98	0.0726	0.9333	0.375	1	0.89884612244898	0.903832	0.13500693877551	0.853011102040816	0.389999673469388	1	0.102650607765256	0.100856964519843	0.0636681222951117	0.130103373143979	0.0423790449114384
398	3 vs. 39	2	0.9928	0.9916	0.0585	0.9677	0.3542	2	0.98733412244898	0.985032326530612	0.0720954285714286	0.92485012244898	0.374998775510204	2	0.0100464514953486	0.0123890461273489	0.0270997599415362	0.0467822755882719	0.0481111504828868
399	3 vs. 39	3	0.0991	0.0999	0.4305	0	0.4792	3	0.755337551020408	0.757762775510204	0.185275510204082	0.653356163265306	0.506666612244898	3	0.215412445918853	0.212311770503312	0.0832591056930451	0.204524859292461	0.0496309945955463
400	3 vs. 40	1	0.8695	0.9098	0.1764	0.8667	0.375	1	0.89884612244898	0.903832	0.13500693877551	0.853011102040816	0.389999673469388	1	0.102650607765256	0.100856964519843	0.0636681222951117	0.130103373143979	0.0423790449114384
401	3 vs. 40	2	0.9874	0.9913	0.0776	0.9091	0.3125	2	0.98733412244898	0.985032326530612	0.0720954285714286	0.92485012244898	0.374998775510204	2	0.0100464514953486	0.0123890461273489	0.0270997599415362	0.0467822755882719	0.0481111504828868
402	3 vs. 40	3	0.5455	0.5964	0.2785	0.32	0.4792	3	0.755337551020408	0.757762775510204	0.185275510204082	0.653356163265306	0.506666612244898	3	0.215412445918853	0.212311770503312	0.0832591056930451	0.204524859292461	0.0496309945955463
403	3 vs. 41	1	0.9509	0.969	0.1073	0.9333	0.375	1	0.89884612244898	0.903832	0.13500693877551	0.853011102040816	0.389999673469388	1	0.102650607765256	0.100856964519843	0.0636681222951117	0.130103373143979	0.0423790449114384
404	3 vs. 41	2	0.9943	0.996	0.052	1	0.375	2	0.98733412244898	0.985032326530612	0.0720954285714286	0.92485012244898	0.374998775510204	2	0.0100464514953486	0.0123890461273489	0.0270997599415362	0.0467822755882719	0.0481111504828868
405	3 vs. 41	3	0.5923	0.6358	0.2607	0.3571	0.4167	3	0.755337551020408	0.757762775510204	0.185275510204082	0.653356163265306	0.506666612244898	3	0.215412445918853	0.212311770503312	0.0832591056930451	0.204524859292461	0.0496309945955463
406	3 vs. 42	1	0.9633	0.9689	0.0909	0.9286	0.4167	1	0.89884612244898	0.903832	0.13500693877551	0.853011102040816	0.389999673469388	1	0.102650607765256	0.100856964519843	0.0636681222951117	0.130103373143979	0.0423790449114384
407	3 vs. 42	2	0.9886	0.9844	0.0738	0.8966	0.3958	2	0.98733412244898	0.985032326530612	0.0720954285714286	0.92485012244898	0.374998775510204	2	0.0100464514953486	0.0123890461273489	0.0270997599415362	0.0467822755882719	0.0481111504828868
408	3 vs. 42	3	0.5285	0.559	0.2693	0.32	0.4792	3	0.755337551020408	0.757762775510204	0.185275510204082	0.653356163265306	0.506666612244898	3	0.215412445918853	0.212311770503312	0.0832591056930451	0.204524859292461	0.0496309945955463
409	3 vs. 43	1	0.9765	0.9799	0.0734	0.9655	0.3958	1	0.89884612244898	0.903832	0.13500693877551	0.853011102040816	0.389999673469388	1	0.102650607765256	0.100856964519843	0.0636681222951117	0.130103373143979	0.0423790449114384
410	3 vs. 43	2	0.9951	0.9952	0.0486	0.9677	0.3542	2	0.98733412244898	0.985032326530612	0.0720954285714286	0.92485012244898	0.374998775510204	2	0.0100464514953486	0.0123890461273489	0.0270997599415362	0.0467822755882719	0.0481111504828868
411	3 vs. 43	3	0.5001	0.5568	0.2874	0.4444	0.4375	3	0.755337551020408	0.757762775510204	0.185275510204082	0.653356163265306	0.506666612244898	3	0.215412445918853	0.212311770503312	0.0832591056930451	0.204524859292461	0.0496309945955463
412	3 vs. 44	1	0.793	0.7935	0.2082	0.7692	0.4583	1	0.89884612244898	0.903832	0.13500693877551	0.853011102040816	0.389999673469388	1	0.102650607765256	0.100856964519843	0.0636681222951117	0.130103373143979	0.0423790449114384
413	3 vs. 44	2	0.9902	0.9865	0.0683	0.9286	0.4167	2	0.98733412244898	0.985032326530612	0.0720954285714286	0.92485012244898	0.374998775510204	2	0.0100464514953486	0.0123890461273489	0.0270997599415362	0.0467822755882719	0.0481111504828868
414	3 vs. 44	3	0.6234	0.6718	0.2467	0.4286	0.4167	3	0.755337551020408	0.757762775510204	0.185275510204082	0.653356163265306	0.506666612244898	3	0.215412445918853	0.212311770503312	0.0832591056930451	0.204524859292461	0.0496309945955463
415	3 vs. 45	1	0.9389	0.9587	0.1204	0.9333	0.375	1	0.89884612244898	0.903832	0.13500693877551	0.853011102040816	0.389999673469388	1	0.102650607765256	0.100856964519843	0.0636681222951117	0.130103373143979	0.0423790449114384
416	3 vs. 45	2	0.9928	0.9938	0.0585	0.9375	0.3333	2	0.98733412244898	0.985032326530612	0.0720954285714286	0.92485012244898	0.374998775510204	2	0.0100464514953486	0.0123890461273489	0.0270997599415362	0.0467822755882719	0.0481111504828868
417	3 vs. 45	3	0.2841	0.3607	0.3561	0.3333	0.5	3	0.755337551020408	0.757762775510204	0.185275510204082	0.653356163265306	0.506666612244898	3	0.215412445918853	0.212311770503312	0.0832591056930451	0.204524859292461	0.0496309945955463
418	3 vs. 46	1	0.8527	0.8572	0.1777	0.9333	0.375	1	0.89884612244898	0.903832	0.13500693877551	0.853011102040816	0.389999673469388	1	0.102650607765256	0.100856964519843	0.0636681222951117	0.130103373143979	0.0423790449114384
419	3 vs. 46	2	0.9734	0.9639	0.1122	0.8667	0.375	2	0.98733412244898	0.985032326530612	0.0720954285714286	0.92485012244898	0.374998775510204	2	0.0100464514953486	0.0123890461273489	0.0270997599415362	0.0467822755882719	0.0481111504828868
420	3 vs. 46	3	0.9284	0.9309	0.1038	0.7826	0.5208	3	0.755337551020408	0.757762775510204	0.185275510204082	0.653356163265306	0.506666612244898	3	0.215412445918853	0.212311770503312	0.0832591056930451	0.204524859292461	0.0496309945955463
421	3 vs. 47	1	0.9717	0.9749	0.0812	0.9375	0.3333	1	0.89884612244898	0.903832	0.13500693877551	0.853011102040816	0.389999673469388	1	0.102650607765256	0.100856964519843	0.0636681222951117	0.130103373143979	0.0423790449114384
422	3 vs. 47	2	0.9961	0.9963	0.0432	0.9677	0.3542	2	0.98733412244898	0.985032326530612	0.0720954285714286	0.92485012244898	0.374998775510204	2	0.0100464514953486	0.0123890461273489	0.0270997599415362	0.0467822755882719	0.0481111504828868
423	3 vs. 47	3	0.4142	0.4718	0.3127	0.3077	0.4583	3	0.755337551020408	0.757762775510204	0.185275510204082	0.653356163265306	0.506666612244898	3	0.215412445918853	0.212311770503312	0.0832591056930451	0.204524859292461	0.0496309945955463
424	3 vs. 48	1	0.9456	0.9517	0.1102	0.8387	0.3542	1	0.89884612244898	0.903832	0.13500693877551	0.853011102040816	0.389999673469388	1	0.102650607765256	0.100856964519843	0.0636681222951117	0.130103373143979	0.0423790449114384
425	3 vs. 48	2	0.9791	0.972	0.0996	0.9286	0.4167	2	0.98733412244898	0.985032326530612	0.0720954285714286	0.92485012244898	0.374998775510204	2	0.0100464514953486	0.0123890461273489	0.0270997599415362	0.0467822755882719	0.0481111504828868
426	3 vs. 48	3	0.5734	0.5741	0.2526	0.5714	0.5625	3	0.755337551020408	0.757762775510204	0.185275510204082	0.653356163265306	0.506666612244898	3	0.215412445918853	0.212311770503312	0.0832591056930451	0.204524859292461	0.0496309945955463
427	3 vs. 49	1	0.9336	0.9483	0.1271	0.9333	0.375	1	0.89884612244898	0.903832	0.13500693877551	0.853011102040816	0.389999673469388	1	0.102650607765256	0.100856964519843	0.0636681222951117	0.130103373143979	0.0423790449114384
428	3 vs. 49	2	0.9956	0.9962	0.0461	0.9677	0.3542	2	0.98733412244898	0.985032326530612	0.0720954285714286	0.92485012244898	0.374998775510204	2	0.0100464514953486	0.0123890461273489	0.0270997599415362	0.0467822755882719	0.0481111504828868
429	3 vs. 49	3	0.4533	0.5247	0.3084	0.32	0.4792	3	0.755337551020408	0.757762775510204	0.185275510204082	0.653356163265306	0.506666612244898	3	0.215412445918853	0.212311770503312	0.0832591056930451	0.204524859292461	0.0496309945955463
430	3 vs. 50	1	0.9244	0.9257	0.1299	0.8667	0.375	1	0.89884612244898	0.903832	0.13500693877551	0.853011102040816	0.389999673469388	1	0.102650607765256	0.100856964519843	0.0636681222951117	0.130103373143979	0.0423790449114384
431	3 vs. 50	2	0.9826	0.9754	0.0908	0.9286	0.4167	2	0.98733412244898	0.985032326530612	0.0720954285714286	0.92485012244898	0.374998775510204	2	0.0100464514953486	0.0123890461273489	0.0270997599415362	0.0467822755882719	0.0481111504828868
432	3 vs. 50	3	0.8047	0.8307	0.177	0.6897	0.3958	3	0.755337551020408	0.757762775510204	0.185275510204082	0.653356163265306	0.506666612244898	3	0.215412445918853	0.212311770503312	0.0832591056930451	0.204524859292461	0.0496309945955463
433	4 vs. 5	1	0.9421	0.9423	0.1121	0.8889	0.4375	1	0.89884612244898	0.903832	0.13500693877551	0.853011102040816	0.389999673469388	1	0.102650607765256	0.100856964519843	0.0636681222951117	0.130103373143979	0.0423790449114384
434	4 vs. 5	2	0.9887	0.984	0.0724	0.8387	0.3542	2	0.98733412244898	0.985032326530612	0.0720954285714286	0.92485012244898	0.374998775510204	2	0.0100464514953486	0.0123890461273489	0.0270997599415362	0.0467822755882719	0.0481111504828868
435	4 vs. 5	3	0.0916	0.0691	0.3963	0.1481	0.4375	3	0.755337551020408	0.757762775510204	0.185275510204082	0.653356163265306	0.506666612244898	3	0.215412445918853	0.212311770503312	0.0832591056930451	0.204524859292461	0.0496309945955463
436	4 vs. 6	1	0.9354	0.9396	0.1221	0.9655	0.3958	1	0.89884612244898	0.903832	0.13500693877551	0.853011102040816	0.389999673469388	1	0.102650607765256	0.100856964519843	0.0636681222951117	0.130103373143979	0.0423790449114384
437	4 vs. 6	2	0.9876	0.9826	0.0756	0.8966	0.3958	2	0.98733412244898	0.985032326530612	0.0720954285714286	0.92485012244898	0.374998775510204	2	0.0100464514953486	0.0123890461273489	0.0270997599415362	0.0467822755882719	0.0481111504828868
438	4 vs. 6	3	0.9523	0.9589	0.0938	0.8571	0.5625	3	0.755337551020408	0.757762775510204	0.185275510204082	0.653356163265306	0.506666612244898	3	0.215412445918853	0.212311770503312	0.0832591056930451	0.204524859292461	0.0496309945955463
439	4 vs. 7	1	0.9564	0.9563	0.0972	0.9286	0.4167	1	0.89884612244898	0.903832	0.13500693877551	0.853011102040816	0.389999673469388	1	0.102650607765256	0.100856964519843	0.0636681222951117	0.130103373143979	0.0423790449114384
440	4 vs. 7	2	0.996	0.9943	0.043	0.963	0.4375	2	0.98733412244898	0.985032326530612	0.0720954285714286	0.92485012244898	0.374998775510204	2	0.0100464514953486	0.0123890461273489	0.0270997599415362	0.0467822755882719	0.0481111504828868
441	4 vs. 7	3	0.7158	0.6876	0.2221	0.75	0.5	3	0.755337551020408	0.757762775510204	0.185275510204082	0.653356163265306	0.506666612244898	3	0.215412445918853	0.212311770503312	0.0832591056930451	0.204524859292461	0.0496309945955463
442	4 vs. 8	1	0.9047	0.9059	0.1418	0.8889	0.4375	1	0.89884612244898	0.903832	0.13500693877551	0.853011102040816	0.389999673469388	1	0.102650607765256	0.100856964519843	0.0636681222951117	0.130103373143979	0.0423790449114384
443	4 vs. 8	2	0.9909	0.9888	0.0647	1	0.4167	2	0.98733412244898	0.985032326530612	0.0720954285714286	0.92485012244898	0.374998775510204	2	0.0100464514953486	0.0123890461273489	0.0270997599415362	0.0467822755882719	0.0481111504828868
444	4 vs. 8	3	0.9032	0.8957	0.13	0.7826	0.5208	3	0.755337551020408	0.757762775510204	0.185275510204082	0.653356163265306	0.506666612244898	3	0.215412445918853	0.212311770503312	0.0832591056930451	0.204524859292461	0.0496309945955463
445	4 vs. 9	1	0.8698	0.8696	0.1667	0.8148	0.4375	1	0.89884612244898	0.903832	0.13500693877551	0.853011102040816	0.389999673469388	1	0.102650607765256	0.100856964519843	0.0636681222951117	0.130103373143979	0.0423790449114384
446	4 vs. 9	2	0.983	0.976	0.0883	0.963	0.4375	2	0.98733412244898	0.985032326530612	0.0720954285714286	0.92485012244898	0.374998775510204	2	0.0100464514953486	0.0123890461273489	0.0270997599415362	0.0467822755882719	0.0481111504828868
447	4 vs. 9	3	0.052	0.0275	0.398	0.1667	0.5	3	0.755337551020408	0.757762775510204	0.185275510204082	0.653356163265306	0.506666612244898	3	0.215412445918853	0.212311770503312	0.0832591056930451	0.204524859292461	0.0496309945955463
448	4 vs. 10	1	0.9342	0.9364	0.119	0.8571	0.4167	1	0.89884612244898	0.903832	0.13500693877551	0.853011102040816	0.389999673469388	1	0.102650607765256	0.100856964519843	0.0636681222951117	0.130103373143979	0.0423790449114384
449	4 vs. 10	2	0.9938	0.9912	0.0536	0.963	0.4375	2	0.98733412244898	0.985032326530612	0.0720954285714286	0.92485012244898	0.374998775510204	2	0.0100464514953486	0.0123890461273489	0.0270997599415362	0.0467822755882719	0.0481111504828868
450	4 vs. 10	3	0.452	0.4017	0.3044	0.3333	0.5	3	0.755337551020408	0.757762775510204	0.185275510204082	0.653356163265306	0.506666612244898	3	0.215412445918853	0.212311770503312	0.0832591056930451	0.204524859292461	0.0496309945955463
451	4 vs. 11	1	0.976	0.9764	0.074	0.9655	0.3958	1	0.89884612244898	0.903832	0.13500693877551	0.853011102040816	0.389999673469388	1	0.102650607765256	0.100856964519843	0.0636681222951117	0.130103373143979	0.0423790449114384
452	4 vs. 11	2	0.9939	0.9922	0.0528	1	0.4167	2	0.98733412244898	0.985032326530612	0.0720954285714286	0.92485012244898	0.374998775510204	2	0.0100464514953486	0.0123890461273489	0.0270997599415362	0.0467822755882719	0.0481111504828868
453	4 vs. 11	3	0.7947	0.77	0.1925	0.72	0.4792	3	0.755337551020408	0.757762775510204	0.185275510204082	0.653356163265306	0.506666612244898	3	0.215412445918853	0.212311770503312	0.0832591056930451	0.204524859292461	0.0496309945955463
454	4 vs. 12	1	0.9129	0.9212	0.1438	0.8571	0.4167	1	0.89884612244898	0.903832	0.13500693877551	0.853011102040816	0.389999673469388	1	0.102650607765256	0.100856964519843	0.0636681222951117	0.130103373143979	0.0423790449114384
455	4 vs. 12	2	0.9824	0.9814	0.0909	0.9032	0.3542	2	0.98733412244898	0.985032326530612	0.0720954285714286	0.92485012244898	0.374998775510204	2	0.0100464514953486	0.0123890461273489	0.0270997599415362	0.0467822755882719	0.0481111504828868
456	4 vs. 12	3	0.7309	0.7007	0.2204	0.6667	0.5	3	0.755337551020408	0.757762775510204	0.185275510204082	0.653356163265306	0.506666612244898	3	0.215412445918853	0.212311770503312	0.0832591056930451	0.204524859292461	0.0496309945955463
457	4 vs. 13	1	0.8791	0.8795	0.1594	0.8	0.375	1	0.89884612244898	0.903832	0.13500693877551	0.853011102040816	0.389999673469388	1	0.102650607765256	0.100856964519843	0.0636681222951117	0.130103373143979	0.0423790449114384
458	4 vs. 13	2	0.9867	0.9848	0.0791	0.963	0.4375	2	0.98733412244898	0.985032326530612	0.0720954285714286	0.92485012244898	0.374998775510204	2	0.0100464514953486	0.0123890461273489	0.0270997599415362	0.0467822755882719	0.0481111504828868
459	4 vs. 13	3	0.8622	0.8534	0.1586	0.8696	0.5208	3	0.755337551020408	0.757762775510204	0.185275510204082	0.653356163265306	0.506666612244898	3	0.215412445918853	0.212311770503312	0.0832591056930451	0.204524859292461	0.0496309945955463
460	4 vs. 14	1	0.9571	0.9601	0.0985	0.9286	0.4167	1	0.89884612244898	0.903832	0.13500693877551	0.853011102040816	0.389999673469388	1	0.102650607765256	0.100856964519843	0.0636681222951117	0.130103373143979	0.0423790449114384
461	4 vs. 14	2	0.9898	0.9865	0.0688	0.8966	0.3958	2	0.98733412244898	0.985032326530612	0.0720954285714286	0.92485012244898	0.374998775510204	2	0.0100464514953486	0.0123890461273489	0.0270997599415362	0.0467822755882719	0.0481111504828868
462	4 vs. 14	3	0.5286	0.4601	0.2838	0.3478	0.5208	3	0.755337551020408	0.757762775510204	0.185275510204082	0.653356163265306	0.506666612244898	3	0.215412445918853	0.212311770503312	0.0832591056930451	0.204524859292461	0.0496309945955463
463	4 vs. 15	1	0.9737	0.9766	0.0762	0.9333	0.375	1	0.89884612244898	0.903832	0.13500693877551	0.853011102040816	0.389999673469388	1	0.102650607765256	0.100856964519843	0.0636681222951117	0.130103373143979	0.0423790449114384
464	4 vs. 15	2	0.9915	0.9889	0.0625	0.9655	0.3958	2	0.98733412244898	0.985032326530612	0.0720954285714286	0.92485012244898	0.374998775510204	2	0.0100464514953486	0.0123890461273489	0.0270997599415362	0.0467822755882719	0.0481111504828868
465	4 vs. 15	3	0.5327	0.4685	0.2842	0.4167	0.5	3	0.755337551020408	0.757762775510204	0.185275510204082	0.653356163265306	0.506666612244898	3	0.215412445918853	0.212311770503312	0.0832591056930451	0.204524859292461	0.0496309945955463
466	4 vs. 16	1	0.9439	0.9497	0.1114	0.8148	0.4375	1	0.89884612244898	0.903832	0.13500693877551	0.853011102040816	0.389999673469388	1	0.102650607765256	0.100856964519843	0.0636681222951117	0.130103373143979	0.0423790449114384
467	4 vs. 16	2	0.9893	0.9863	0.07	0.9286	0.4167	2	0.98733412244898	0.985032326530612	0.0720954285714286	0.92485012244898	0.374998775510204	2	0.0100464514953486	0.0123890461273489	0.0270997599415362	0.0467822755882719	0.0481111504828868
468	4 vs. 16	3	0.1605	0.1555	0.4396	0.08	0.4792	3	0.755337551020408	0.757762775510204	0.185275510204082	0.653356163265306	0.506666612244898	3	0.215412445918853	0.212311770503312	0.0832591056930451	0.204524859292461	0.0496309945955463
469	4 vs. 17	1	0.9497	0.9512	0.1066	0.9655	0.3958	1	0.89884612244898	0.903832	0.13500693877551	0.853011102040816	0.389999673469388	1	0.102650607765256	0.100856964519843	0.0636681222951117	0.130103373143979	0.0423790449114384
470	4 vs. 17	2	0.9918	0.9889	0.0618	0.9655	0.3958	2	0.98733412244898	0.985032326530612	0.0720954285714286	0.92485012244898	0.374998775510204	2	0.0100464514953486	0.0123890461273489	0.0270997599415362	0.0467822755882719	0.0481111504828868
471	4 vs. 17	3	0.9524	0.951	0.0968	0.8182	0.5417	3	0.755337551020408	0.757762775510204	0.185275510204082	0.653356163265306	0.506666612244898	3	0.215412445918853	0.212311770503312	0.0832591056930451	0.204524859292461	0.0496309945955463
472	4 vs. 18	1	0.9717	0.973	0.0804	0.9333	0.375	1	0.89884612244898	0.903832	0.13500693877551	0.853011102040816	0.389999673469388	1	0.102650607765256	0.100856964519843	0.0636681222951117	0.130103373143979	0.0423790449114384
473	4 vs. 18	2	0.9927	0.9898	0.0582	0.8966	0.3958	2	0.98733412244898	0.985032326530612	0.0720954285714286	0.92485012244898	0.374998775510204	2	0.0100464514953486	0.0123890461273489	0.0270997599415362	0.0467822755882719	0.0481111504828868
474	4 vs. 18	3	0.6459	0.6304	0.2404	0.5833	0.5	3	0.755337551020408	0.757762775510204	0.185275510204082	0.653356163265306	0.506666612244898	3	0.215412445918853	0.212311770503312	0.0832591056930451	0.204524859292461	0.0496309945955463
475	4 vs. 19	1	0.9549	0.9552	0.0995	0.9333	0.375	1	0.89884612244898	0.903832	0.13500693877551	0.853011102040816	0.389999673469388	1	0.102650607765256	0.100856964519843	0.0636681222951117	0.130103373143979	0.0423790449114384
476	4 vs. 19	2	0.9873	0.9829	0.0768	0.8966	0.3958	2	0.98733412244898	0.985032326530612	0.0720954285714286	0.92485012244898	0.374998775510204	2	0.0100464514953486	0.0123890461273489	0.0270997599415362	0.0467822755882719	0.0481111504828868
477	4 vs. 19	3	0.6346	0.5902	0.2433	0.64	0.4792	3	0.755337551020408	0.757762775510204	0.185275510204082	0.653356163265306	0.506666612244898	3	0.215412445918853	0.212311770503312	0.0832591056930451	0.204524859292461	0.0496309945955463
478	4 vs. 20	1	0.9807	0.9814	0.0651	0.9231	0.4583	1	0.89884612244898	0.903832	0.13500693877551	0.853011102040816	0.389999673469388	1	0.102650607765256	0.100856964519843	0.0636681222951117	0.130103373143979	0.0423790449114384
479	4 vs. 20	2	0.9968	0.9958	0.0383	0.963	0.4375	2	0.98733412244898	0.985032326530612	0.0720954285714286	0.92485012244898	0.374998775510204	2	0.0100464514953486	0.0123890461273489	0.0270997599415362	0.0467822755882719	0.0481111504828868
480	4 vs. 20	3	0.8686	0.8563	0.1513	0.8571	0.5625	3	0.755337551020408	0.757762775510204	0.185275510204082	0.653356163265306	0.506666612244898	3	0.215412445918853	0.212311770503312	0.0832591056930451	0.204524859292461	0.0496309945955463
481	4 vs. 21	1	0.9001	0.9137	0.1501	0.9655	0.3958	1	0.89884612244898	0.903832	0.13500693877551	0.853011102040816	0.389999673469388	1	0.102650607765256	0.100856964519843	0.0636681222951117	0.130103373143979	0.0423790449114384
482	4 vs. 21	2	0.9622	0.9619	0.1336	0.8485	0.3125	2	0.98733412244898	0.985032326530612	0.0720954285714286	0.92485012244898	0.374998775510204	2	0.0100464514953486	0.0123890461273489	0.0270997599415362	0.0467822755882719	0.0481111504828868
483	4 vs. 21	3	0.1069	0.1116	0.4114	0	0.5208	3	0.755337551020408	0.757762775510204	0.185275510204082	0.653356163265306	0.506666612244898	3	0.215412445918853	0.212311770503312	0.0832591056930451	0.204524859292461	0.0496309945955463
484	4 vs. 22	1	0.9688	0.9689	0.0836	1	0.4167	1	0.89884612244898	0.903832	0.13500693877551	0.853011102040816	0.389999673469388	1	0.102650607765256	0.100856964519843	0.0636681222951117	0.130103373143979	0.0423790449114384
485	4 vs. 22	2	0.9951	0.9931	0.0476	0.9333	0.375	2	0.98733412244898	0.985032326530612	0.0720954285714286	0.92485012244898	0.374998775510204	2	0.0100464514953486	0.0123890461273489	0.0270997599415362	0.0467822755882719	0.0481111504828868
486	4 vs. 22	3	0.8302	0.8205	0.1695	0.8182	0.5417	3	0.755337551020408	0.757762775510204	0.185275510204082	0.653356163265306	0.506666612244898	3	0.215412445918853	0.212311770503312	0.0832591056930451	0.204524859292461	0.0496309945955463
487	4 vs. 23	1	0.9704	0.9708	0.0805	0.9032	0.3542	1	0.89884612244898	0.903832	0.13500693877551	0.853011102040816	0.389999673469388	1	0.102650607765256	0.100856964519843	0.0636681222951117	0.130103373143979	0.0423790449114384
488	4 vs. 23	2	0.9958	0.9941	0.044	0.963	0.4375	2	0.98733412244898	0.985032326530612	0.0720954285714286	0.92485012244898	0.374998775510204	2	0.0100464514953486	0.0123890461273489	0.0270997599415362	0.0467822755882719	0.0481111504828868
489	4 vs. 23	3	0.7601	0.7307	0.2046	0.6957	0.5208	3	0.755337551020408	0.757762775510204	0.185275510204082	0.653356163265306	0.506666612244898	3	0.215412445918853	0.212311770503312	0.0832591056930451	0.204524859292461	0.0496309945955463
490	4 vs. 24	1	0.954	0.9558	0.1059	0.9655	0.3958	1	0.89884612244898	0.903832	0.13500693877551	0.853011102040816	0.389999673469388	1	0.102650607765256	0.100856964519843	0.0636681222951117	0.130103373143979	0.0423790449114384
491	4 vs. 24	2	0.9939	0.9918	0.053	0.9333	0.375	2	0.98733412244898	0.985032326530612	0.0720954285714286	0.92485012244898	0.374998775510204	2	0.0100464514953486	0.0123890461273489	0.0270997599415362	0.0467822755882719	0.0481111504828868
492	4 vs. 24	3	0.9236	0.9196	0.1193	0.8182	0.5417	3	0.755337551020408	0.757762775510204	0.185275510204082	0.653356163265306	0.506666612244898	3	0.215412445918853	0.212311770503312	0.0832591056930451	0.204524859292461	0.0496309945955463
493	4 vs. 25	1	0.9614	0.9613	0.0942	0.9655	0.3958	1	0.89884612244898	0.903832	0.13500693877551	0.853011102040816	0.389999673469388	1	0.102650607765256	0.100856964519843	0.0636681222951117	0.130103373143979	0.0423790449114384
494	4 vs. 25	2	0.9826	0.9813	0.0906	0.9333	0.375	2	0.98733412244898	0.985032326530612	0.0720954285714286	0.92485012244898	0.374998775510204	2	0.0100464514953486	0.0123890461273489	0.0270997599415362	0.0467822755882719	0.0481111504828868
495	4 vs. 25	3	0.3834	0.3841	0.313	0.2857	0.5625	3	0.755337551020408	0.757762775510204	0.185275510204082	0.653356163265306	0.506666612244898	3	0.215412445918853	0.212311770503312	0.0832591056930451	0.204524859292461	0.0496309945955463
496	4 vs. 26	1	0.9754	0.9775	0.0761	0.9333	0.375	1	0.89884612244898	0.903832	0.13500693877551	0.853011102040816	0.389999673469388	1	0.102650607765256	0.100856964519843	0.0636681222951117	0.130103373143979	0.0423790449114384
497	4 vs. 26	2	0.9955	0.9946	0.0458	1	0.4167	2	0.98733412244898	0.985032326530612	0.0720954285714286	0.92485012244898	0.374998775510204	2	0.0100464514953486	0.0123890461273489	0.0270997599415362	0.0467822755882719	0.0481111504828868
498	4 vs. 26	3	0.7417	0.7093	0.2092	0.7273	0.5417	3	0.755337551020408	0.757762775510204	0.185275510204082	0.653356163265306	0.506666612244898	3	0.215412445918853	0.212311770503312	0.0832591056930451	0.204524859292461	0.0496309945955463
499	4 vs. 27	1	0.9112	0.9122	0.1401	0.875	0.3333	1	0.89884612244898	0.903832	0.13500693877551	0.853011102040816	0.389999673469388	1	0.102650607765256	0.100856964519843	0.0636681222951117	0.130103373143979	0.0423790449114384
500	4 vs. 27	2	0.9797	0.9721	0.0972	0.9286	0.4167	2	0.98733412244898	0.985032326530612	0.0720954285714286	0.92485012244898	0.374998775510204	2	0.0100464514953486	0.0123890461273489	0.0270997599415362	0.0467822755882719	0.0481111504828868
501	4 vs. 27	3	0.0942	0.0799	0.3807	0.0909	0.5417	3	0.755337551020408	0.757762775510204	0.185275510204082	0.653356163265306	0.506666612244898	3	0.215412445918853	0.212311770503312	0.0832591056930451	0.204524859292461	0.0496309945955463
502	4 vs. 28	1	0.96	0.9599	0.0951	0.9231	0.4583	1	0.89884612244898	0.903832	0.13500693877551	0.853011102040816	0.389999673469388	1	0.102650607765256	0.100856964519843	0.0636681222951117	0.130103373143979	0.0423790449114384
503	4 vs. 28	2	0.9872	0.9826	0.0774	0.8966	0.3958	2	0.98733412244898	0.985032326530612	0.0720954285714286	0.92485012244898	0.374998775510204	2	0.0100464514953486	0.0123890461273489	0.0270997599415362	0.0467822755882719	0.0481111504828868
504	4 vs. 28	3	0.3532	0.3024	0.3332	0.3636	0.5417	3	0.755337551020408	0.757762775510204	0.185275510204082	0.653356163265306	0.506666612244898	3	0.215412445918853	0.212311770503312	0.0832591056930451	0.204524859292461	0.0496309945955463
505	4 vs. 29	1	0.9501	0.9508	0.1043	0.9286	0.4167	1	0.89884612244898	0.903832	0.13500693877551	0.853011102040816	0.389999673469388	1	0.102650607765256	0.100856964519843	0.0636681222951117	0.130103373143979	0.0423790449114384
506	4 vs. 29	2	0.9889	0.9847	0.0712	0.963	0.4375	2	0.98733412244898	0.985032326530612	0.0720954285714286	0.92485012244898	0.374998775510204	2	0.0100464514953486	0.0123890461273489	0.0270997599415362	0.0467822755882719	0.0481111504828868
507	4 vs. 29	3	0.6194	0.579	0.2598	0.4348	0.5208	3	0.755337551020408	0.757762775510204	0.185275510204082	0.653356163265306	0.506666612244898	3	0.215412445918853	0.212311770503312	0.0832591056930451	0.204524859292461	0.0496309945955463
508	4 vs. 30	1	0.9161	0.9277	0.1396	0.8571	0.4167	1	0.89884612244898	0.903832	0.13500693877551	0.853011102040816	0.389999673469388	1	0.102650607765256	0.100856964519843	0.0636681222951117	0.130103373143979	0.0423790449114384
509	4 vs. 30	2	0.9837	0.9861	0.0878	0.9032	0.3542	2	0.98733412244898	0.985032326530612	0.0720954285714286	0.92485012244898	0.374998775510204	2	0.0100464514953486	0.0123890461273489	0.0270997599415362	0.0467822755882719	0.0481111504828868
510	4 vs. 30	3	0.969	0.9728	0.0745	0.8	0.5833	3	0.755337551020408	0.757762775510204	0.185275510204082	0.653356163265306	0.506666612244898	3	0.215412445918853	0.212311770503312	0.0832591056930451	0.204524859292461	0.0496309945955463
511	4 vs. 31	1	0.9789	0.9818	0.068	1	0.4167	1	0.89884612244898	0.903832	0.13500693877551	0.853011102040816	0.389999673469388	1	0.102650607765256	0.100856964519843	0.0636681222951117	0.130103373143979	0.0423790449114384
512	4 vs. 31	2	0.9919	0.9911	0.0611	1	0.4167	2	0.98733412244898	0.985032326530612	0.0720954285714286	0.92485012244898	0.374998775510204	2	0.0100464514953486	0.0123890461273489	0.0270997599415362	0.0467822755882719	0.0481111504828868
513	4 vs. 31	3	0.8754	0.8647	0.1504	0.75	0.5	3	0.755337551020408	0.757762775510204	0.185275510204082	0.653356163265306	0.506666612244898	3	0.215412445918853	0.212311770503312	0.0832591056930451	0.204524859292461	0.0496309945955463
514	4 vs. 32	1	0.8905	0.903	0.1567	0.9286	0.4167	1	0.89884612244898	0.903832	0.13500693877551	0.853011102040816	0.389999673469388	1	0.102650607765256	0.100856964519843	0.0636681222951117	0.130103373143979	0.0423790449114384
515	4 vs. 32	2	0.9807	0.9782	0.0952	0.8667	0.375	2	0.98733412244898	0.985032326530612	0.0720954285714286	0.92485012244898	0.374998775510204	2	0.0100464514953486	0.0123890461273489	0.0270997599415362	0.0467822755882719	0.0481111504828868
516	4 vs. 32	3	0.6168	0.5859	0.2529	0.5217	0.5208	3	0.755337551020408	0.757762775510204	0.185275510204082	0.653356163265306	0.506666612244898	3	0.215412445918853	0.212311770503312	0.0832591056930451	0.204524859292461	0.0496309945955463
517	4 vs. 33	1	0.7935	0.8001	0.2086	0.64	0.4792	1	0.89884612244898	0.903832	0.13500693877551	0.853011102040816	0.389999673469388	1	0.102650607765256	0.100856964519843	0.0636681222951117	0.130103373143979	0.0423790449114384
518	4 vs. 33	2	0.9843	0.978	0.0849	0.963	0.4375	2	0.98733412244898	0.985032326530612	0.0720954285714286	0.92485012244898	0.374998775510204	2	0.0100464514953486	0.0123890461273489	0.0270997599415362	0.0467822755882719	0.0481111504828868
519	4 vs. 33	3	0.3965	0.3549	0.3134	0.2609	0.5208	3	0.755337551020408	0.757762775510204	0.185275510204082	0.653356163265306	0.506666612244898	3	0.215412445918853	0.212311770503312	0.0832591056930451	0.204524859292461	0.0496309945955463
520	4 vs. 34	1	0.9287	0.9347	0.1279	1	0.4167	1	0.89884612244898	0.903832	0.13500693877551	0.853011102040816	0.389999673469388	1	0.102650607765256	0.100856964519843	0.0636681222951117	0.130103373143979	0.0423790449114384
521	4 vs. 34	2	0.9897	0.9873	0.0689	0.8966	0.3958	2	0.98733412244898	0.985032326530612	0.0720954285714286	0.92485012244898	0.374998775510204	2	0.0100464514953486	0.0123890461273489	0.0270997599415362	0.0467822755882719	0.0481111504828868
522	4 vs. 34	3	0.5842	0.5335	0.2661	0.3478	0.5208	3	0.755337551020408	0.757762775510204	0.185275510204082	0.653356163265306	0.506666612244898	3	0.215412445918853	0.212311770503312	0.0832591056930451	0.204524859292461	0.0496309945955463
523	4 vs. 35	1	0.9285	0.9284	0.1283	0.9333	0.375	1	0.89884612244898	0.903832	0.13500693877551	0.853011102040816	0.389999673469388	1	0.102650607765256	0.100856964519843	0.0636681222951117	0.130103373143979	0.0423790449114384
524	4 vs. 35	2	0.9818	0.9775	0.0931	0.9333	0.375	2	0.98733412244898	0.985032326530612	0.0720954285714286	0.92485012244898	0.374998775510204	2	0.0100464514953486	0.0123890461273489	0.0270997599415362	0.0467822755882719	0.0481111504828868
525	4 vs. 35	3	0.7068	0.6843	0.2247	0.6957	0.5208	3	0.755337551020408	0.757762775510204	0.185275510204082	0.653356163265306	0.506666612244898	3	0.215412445918853	0.212311770503312	0.0832591056930451	0.204524859292461	0.0496309945955463
526	4 vs. 36	1	0.9132	0.9198	0.1417	0.9333	0.375	1	0.89884612244898	0.903832	0.13500693877551	0.853011102040816	0.389999673469388	1	0.102650607765256	0.100856964519843	0.0636681222951117	0.130103373143979	0.0423790449114384
527	4 vs. 36	2	0.9826	0.9806	0.0904	0.875	0.3333	2	0.98733412244898	0.985032326530612	0.0720954285714286	0.92485012244898	0.374998775510204	2	0.0100464514953486	0.0123890461273489	0.0270997599415362	0.0467822755882719	0.0481111504828868
528	4 vs. 36	3	0.9324	0.9293	0.1091	0.8571	0.5625	3	0.755337551020408	0.757762775510204	0.185275510204082	0.653356163265306	0.506666612244898	3	0.215412445918853	0.212311770503312	0.0832591056930451	0.204524859292461	0.0496309945955463
529	4 vs. 37	1	0.9632	0.9649	0.0902	0.9333	0.375	1	0.89884612244898	0.903832	0.13500693877551	0.853011102040816	0.389999673469388	1	0.102650607765256	0.100856964519843	0.0636681222951117	0.130103373143979	0.0423790449114384
530	4 vs. 37	2	0.9939	0.9919	0.0527	0.963	0.4375	2	0.98733412244898	0.985032326530612	0.0720954285714286	0.92485012244898	0.374998775510204	2	0.0100464514953486	0.0123890461273489	0.0270997599415362	0.0467822755882719	0.0481111504828868
531	4 vs. 37	3	0.4861	0.4328	0.2945	0.3333	0.5	3	0.755337551020408	0.757762775510204	0.185275510204082	0.653356163265306	0.506666612244898	3	0.215412445918853	0.212311770503312	0.0832591056930451	0.204524859292461	0.0496309945955463
532	4 vs. 38	1	0.9747	0.9757	0.0753	0.9655	0.3958	1	0.89884612244898	0.903832	0.13500693877551	0.853011102040816	0.389999673469388	1	0.102650607765256	0.100856964519843	0.0636681222951117	0.130103373143979	0.0423790449114384
533	4 vs. 38	2	0.9888	0.9882	0.0727	0.9032	0.3542	2	0.98733412244898	0.985032326530612	0.0720954285714286	0.92485012244898	0.374998775510204	2	0.0100464514953486	0.0123890461273489	0.0270997599415362	0.0467822755882719	0.0481111504828868
534	4 vs. 38	3	0.4796	0.4649	0.2912	0.381	0.5625	3	0.755337551020408	0.757762775510204	0.185275510204082	0.653356163265306	0.506666612244898	3	0.215412445918853	0.212311770503312	0.0832591056930451	0.204524859292461	0.0496309945955463
535	4 vs. 39	1	0.973	0.9729	0.0773	0.9655	0.3958	1	0.89884612244898	0.903832	0.13500693877551	0.853011102040816	0.389999673469388	1	0.102650607765256	0.100856964519843	0.0636681222951117	0.130103373143979	0.0423790449114384
536	4 vs. 39	2	0.9953	0.9948	0.0478	0.9333	0.375	2	0.98733412244898	0.985032326530612	0.0720954285714286	0.92485012244898	0.374998775510204	2	0.0100464514953486	0.0123890461273489	0.0270997599415362	0.0467822755882719	0.0481111504828868
537	4 vs. 39	3	0.9488	0.9505	0.0959	1	0.5417	3	0.755337551020408	0.757762775510204	0.185275510204082	0.653356163265306	0.506666612244898	3	0.215412445918853	0.212311770503312	0.0832591056930451	0.204524859292461	0.0496309945955463
538	4 vs. 40	1	0.8499	0.87	0.188	0.8966	0.3958	1	0.89884612244898	0.903832	0.13500693877551	0.853011102040816	0.389999673469388	1	0.102650607765256	0.100856964519843	0.0636681222951117	0.130103373143979	0.0423790449114384
539	4 vs. 40	2	0.9735	0.9725	0.1119	0.875	0.3333	2	0.98733412244898	0.985032326530612	0.0720954285714286	0.92485012244898	0.374998775510204	2	0.0100464514953486	0.0123890461273489	0.0270997599415362	0.0467822755882719	0.0481111504828868
540	4 vs. 40	3	0.8243	0.8035	0.1782	0.8182	0.5417	3	0.755337551020408	0.757762775510204	0.185275510204082	0.653356163265306	0.506666612244898	3	0.215412445918853	0.212311770503312	0.0832591056930451	0.204524859292461	0.0496309945955463
541	4 vs. 41	1	0.9346	0.941	0.1231	0.9655	0.3958	1	0.89884612244898	0.903832	0.13500693877551	0.853011102040816	0.389999673469388	1	0.102650607765256	0.100856964519843	0.0636681222951117	0.130103373143979	0.0423790449114384
542	4 vs. 41	2	0.9838	0.9815	0.0872	0.8966	0.3958	2	0.98733412244898	0.985032326530612	0.0720954285714286	0.92485012244898	0.374998775510204	2	0.0100464514953486	0.0123890461273489	0.0270997599415362	0.0467822755882719	0.0481111504828868
543	4 vs. 41	3	0.7696	0.7434	0.2018	0.64	0.4792	3	0.755337551020408	0.757762775510204	0.185275510204082	0.653356163265306	0.506666612244898	3	0.215412445918853	0.212311770503312	0.0832591056930451	0.204524859292461	0.0496309945955463
544	4 vs. 42	1	0.9616	0.962	0.0918	0.963	0.4375	1	0.89884612244898	0.903832	0.13500693877551	0.853011102040816	0.389999673469388	1	0.102650607765256	0.100856964519843	0.0636681222951117	0.130103373143979	0.0423790449114384
545	4 vs. 42	2	0.9944	0.9924	0.0507	1	0.4167	2	0.98733412244898	0.985032326530612	0.0720954285714286	0.92485012244898	0.374998775510204	2	0.0100464514953486	0.0123890461273489	0.0270997599415362	0.0467822755882719	0.0481111504828868
546	4 vs. 42	3	0.7774	0.7555	0.1921	0.8182	0.5417	3	0.755337551020408	0.757762775510204	0.185275510204082	0.653356163265306	0.506666612244898	3	0.215412445918853	0.212311770503312	0.0832591056930451	0.204524859292461	0.0496309945955463
547	4 vs. 43	1	0.9763	0.9763	0.0732	1	0.4167	1	0.89884612244898	0.903832	0.13500693877551	0.853011102040816	0.389999673469388	1	0.102650607765256	0.100856964519843	0.0636681222951117	0.130103373143979	0.0423790449114384
548	4 vs. 43	2	0.9838	0.9796	0.0882	0.9333	0.375	2	0.98733412244898	0.985032326530612	0.0720954285714286	0.92485012244898	0.374998775510204	2	0.0100464514953486	0.0123890461273489	0.0270997599415362	0.0467822755882719	0.0481111504828868
549	4 vs. 43	3	0.8115	0.7895	0.1819	0.75	0.5	3	0.755337551020408	0.757762775510204	0.185275510204082	0.653356163265306	0.506666612244898	3	0.215412445918853	0.212311770503312	0.0832591056930451	0.204524859292461	0.0496309945955463
550	4 vs. 44	1	0.8247	0.8252	0.1895	0.72	0.4792	1	0.89884612244898	0.903832	0.13500693877551	0.853011102040816	0.389999673469388	1	0.102650607765256	0.100856964519843	0.0636681222951117	0.130103373143979	0.0423790449114384
551	4 vs. 44	2	0.9928	0.9901	0.058	0.963	0.4375	2	0.98733412244898	0.985032326530612	0.0720954285714286	0.92485012244898	0.374998775510204	2	0.0100464514953486	0.0123890461273489	0.0270997599415362	0.0467822755882719	0.0481111504828868
552	4 vs. 44	3	0.7593	0.7313	0.2035	0.64	0.4792	3	0.755337551020408	0.757762775510204	0.185275510204082	0.653356163265306	0.506666612244898	3	0.215412445918853	0.212311770503312	0.0832591056930451	0.204524859292461	0.0496309945955463
553	4 vs. 45	1	0.9239	0.9312	0.1337	0.9655	0.3958	1	0.89884612244898	0.903832	0.13500693877551	0.853011102040816	0.389999673469388	1	0.102650607765256	0.100856964519843	0.0636681222951117	0.130103373143979	0.0423790449114384
554	4 vs. 45	2	0.9822	0.9792	0.0913	0.9032	0.3542	2	0.98733412244898	0.985032326530612	0.0720954285714286	0.92485012244898	0.374998775510204	2	0.0100464514953486	0.0123890461273489	0.0270997599415362	0.0467822755882719	0.0481111504828868
555	4 vs. 45	3	0.8652	0.8824	0.1597	0.7619	0.5625	3	0.755337551020408	0.757762775510204	0.185275510204082	0.653356163265306	0.506666612244898	3	0.215412445918853	0.212311770503312	0.0832591056930451	0.204524859292461	0.0496309945955463
556	4 vs. 46	1	0.841	0.8407	0.1819	0.8966	0.3958	1	0.89884612244898	0.903832	0.13500693877551	0.853011102040816	0.389999673469388	1	0.102650607765256	0.100856964519843	0.0636681222951117	0.130103373143979	0.0423790449114384
557	4 vs. 46	2	0.9756	0.9669	0.1054	0.8966	0.3958	2	0.98733412244898	0.985032326530612	0.0720954285714286	0.92485012244898	0.374998775510204	2	0.0100464514953486	0.0123890461273489	0.0270997599415362	0.0467822755882719	0.0481111504828868
558	4 vs. 46	3	0.0507	0.0851	0.3895	0.1	0.5833	3	0.755337551020408	0.757762775510204	0.185275510204082	0.653356163265306	0.506666612244898	3	0.215412445918853	0.212311770503312	0.0832591056930451	0.204524859292461	0.0496309945955463
559	4 vs. 47	1	0.9593	0.9592	0.0969	0.9032	0.3542	1	0.89884612244898	0.903832	0.13500693877551	0.853011102040816	0.389999673469388	1	0.102650607765256	0.100856964519843	0.0636681222951117	0.130103373143979	0.0423790449114384
560	4 vs. 47	2	0.9861	0.9825	0.0809	0.9333	0.375	2	0.98733412244898	0.985032326530612	0.0720954285714286	0.92485012244898	0.374998775510204	2	0.0100464514953486	0.0123890461273489	0.0270997599415362	0.0467822755882719	0.0481111504828868
561	4 vs. 47	3	0.8262	0.8083	0.1755	0.7826	0.5208	3	0.755337551020408	0.757762775510204	0.185275510204082	0.653356163265306	0.506666612244898	3	0.215412445918853	0.212311770503312	0.0832591056930451	0.204524859292461	0.0496309945955463
562	4 vs. 48	1	0.9706	0.9713	0.0801	0.8	0.375	1	0.89884612244898	0.903832	0.13500693877551	0.853011102040816	0.389999673469388	1	0.102650607765256	0.100856964519843	0.0636681222951117	0.130103373143979	0.0423790449114384
563	4 vs. 48	2	0.9913	0.9887	0.0632	0.963	0.4375	2	0.98733412244898	0.985032326530612	0.0720954285714286	0.92485012244898	0.374998775510204	2	0.0100464514953486	0.0123890461273489	0.0270997599415362	0.0467822755882719	0.0481111504828868
564	4 vs. 48	3	0.7309	0.7623	0.2089	0.5556	0.625	3	0.755337551020408	0.757762775510204	0.185275510204082	0.653356163265306	0.506666612244898	3	0.215412445918853	0.212311770503312	0.0832591056930451	0.204524859292461	0.0496309945955463
565	4 vs. 49	1	0.9059	0.91	0.1504	0.9655	0.3958	1	0.89884612244898	0.903832	0.13500693877551	0.853011102040816	0.389999673469388	1	0.102650607765256	0.100856964519843	0.0636681222951117	0.130103373143979	0.0423790449114384
566	4 vs. 49	2	0.9849	0.9814	0.0847	0.9333	0.375	2	0.98733412244898	0.985032326530612	0.0720954285714286	0.92485012244898	0.374998775510204	2	0.0100464514953486	0.0123890461273489	0.0270997599415362	0.0467822755882719	0.0481111504828868
567	4 vs. 49	3	0.8398	0.8275	0.1719	0.7273	0.5417	3	0.755337551020408	0.757762775510204	0.185275510204082	0.653356163265306	0.506666612244898	3	0.215412445918853	0.212311770503312	0.0832591056930451	0.204524859292461	0.0496309945955463
568	4 vs. 50	1	0.9225	0.9304	0.13	0.8276	0.3958	1	0.89884612244898	0.903832	0.13500693877551	0.853011102040816	0.389999673469388	1	0.102650607765256	0.100856964519843	0.0636681222951117	0.130103373143979	0.0423790449114384
569	4 vs. 50	2	0.9928	0.99	0.0577	0.963	0.4375	2	0.98733412244898	0.985032326530612	0.0720954285714286	0.92485012244898	0.374998775510204	2	0.0100464514953486	0.0123890461273489	0.0270997599415362	0.0467822755882719	0.0481111504828868
570	4 vs. 50	3	0.5939	0.566	0.2633	0.4615	0.4583	3	0.755337551020408	0.757762775510204	0.185275510204082	0.653356163265306	0.506666612244898	3	0.215412445918853	0.212311770503312	0.0832591056930451	0.204524859292461	0.0496309945955463
571	5 vs. 6	1	0.9187	0.9199	0.1361	0.9286	0.4167	1	0.89884612244898	0.903832	0.13500693877551	0.853011102040816	0.389999673469388	1	0.102650607765256	0.100856964519843	0.0636681222951117	0.130103373143979	0.0423790449114384
572	5 vs. 6	2	0.9899	0.9858	0.0683	0.9375	0.3333	2	0.98733412244898	0.985032326530612	0.0720954285714286	0.92485012244898	0.374998775510204	2	0.0100464514953486	0.0123890461273489	0.0270997599415362	0.0467822755882719	0.0481111504828868
573	5 vs. 6	3	0.2187	0.203	0.3745	0.3077	0.4583	3	0.755337551020408	0.757762775510204	0.185275510204082	0.653356163265306	0.506666612244898	3	0.215412445918853	0.212311770503312	0.0832591056930451	0.204524859292461	0.0496309945955463
574	5 vs. 7	1	0.9787	0.9795	0.0667	0.8889	0.4375	1	0.89884612244898	0.903832	0.13500693877551	0.853011102040816	0.389999673469388	1	0.102650607765256	0.100856964519843	0.0636681222951117	0.130103373143979	0.0423790449114384
575	5 vs. 7	2	0.9966	0.9952	0.0398	0.8667	0.375	2	0.98733412244898	0.985032326530612	0.0720954285714286	0.92485012244898	0.374998775510204	2	0.0100464514953486	0.0123890461273489	0.0270997599415362	0.0467822755882719	0.0481111504828868
576	5 vs. 7	3	0.7283	0.7383	0.2154	0.5517	0.3958	3	0.755337551020408	0.757762775510204	0.185275510204082	0.653356163265306	0.506666612244898	3	0.215412445918853	0.212311770503312	0.0832591056930451	0.204524859292461	0.0496309945955463
577	5 vs. 8	1	0.9188	0.9184	0.1285	0.9231	0.4583	1	0.89884612244898	0.903832	0.13500693877551	0.853011102040816	0.389999673469388	1	0.102650607765256	0.100856964519843	0.0636681222951117	0.130103373143979	0.0423790449114384
578	5 vs. 8	2	0.9838	0.9791	0.0864	0.8387	0.3542	2	0.98733412244898	0.985032326530612	0.0720954285714286	0.92485012244898	0.374998775510204	2	0.0100464514953486	0.0123890461273489	0.0270997599415362	0.0467822755882719	0.0481111504828868
579	5 vs. 8	3	0.455	0.4633	0.3058	0.4286	0.4167	3	0.755337551020408	0.757762775510204	0.185275510204082	0.653356163265306	0.506666612244898	3	0.215412445918853	0.212311770503312	0.0832591056930451	0.204524859292461	0.0496309945955463
580	5 vs. 9	1	0.9216	0.922	0.1277	0.7692	0.4583	1	0.89884612244898	0.903832	0.13500693877551	0.853011102040816	0.389999673469388	1	0.102650607765256	0.100856964519843	0.0636681222951117	0.130103373143979	0.0423790449114384
581	5 vs. 9	2	0.9893	0.9849	0.0703	0.8667	0.375	2	0.98733412244898	0.985032326530612	0.0720954285714286	0.92485012244898	0.374998775510204	2	0.0100464514953486	0.0123890461273489	0.0270997599415362	0.0467822755882719	0.0481111504828868
582	5 vs. 9	3	0.9458	0.9454	0.0949	0.7586	0.3958	3	0.755337551020408	0.757762775510204	0.185275510204082	0.653356163265306	0.506666612244898	3	0.215412445918853	0.212311770503312	0.0832591056930451	0.204524859292461	0.0496309945955463
583	5 vs. 10	1	0.9099	0.9145	0.1369	0.7407	0.4375	1	0.89884612244898	0.903832	0.13500693877551	0.853011102040816	0.389999673469388	1	0.102650607765256	0.100856964519843	0.0636681222951117	0.130103373143979	0.0423790449114384
584	5 vs. 10	2	0.9928	0.9898	0.0578	0.8667	0.375	2	0.98733412244898	0.985032326530612	0.0720954285714286	0.92485012244898	0.374998775510204	2	0.0100464514953486	0.0123890461273489	0.0270997599415362	0.0467822755882719	0.0481111504828868
585	5 vs. 10	3	0.906	0.9212	0.1251	0.8966	0.3958	3	0.755337551020408	0.757762775510204	0.185275510204082	0.653356163265306	0.506666612244898	3	0.215412445918853	0.212311770503312	0.0832591056930451	0.204524859292461	0.0496309945955463
586	5 vs. 11	1	0.9696	0.9694	0.0833	0.9286	0.4167	1	0.89884612244898	0.903832	0.13500693877551	0.853011102040816	0.389999673469388	1	0.102650607765256	0.100856964519843	0.0636681222951117	0.130103373143979	0.0423790449114384
587	5 vs. 11	2	0.9941	0.9925	0.0523	0.8387	0.3542	2	0.98733412244898	0.985032326530612	0.0720954285714286	0.92485012244898	0.374998775510204	2	0.0100464514953486	0.0123890461273489	0.0270997599415362	0.0467822755882719	0.0481111504828868
588	5 vs. 11	3	0.6077	0.6277	0.264	0.4667	0.375	3	0.755337551020408	0.757762775510204	0.185275510204082	0.653356163265306	0.506666612244898	3	0.215412445918853	0.212311770503312	0.0832591056930451	0.204524859292461	0.0496309945955463
589	5 vs. 12	1	0.9029	0.9069	0.1512	0.8889	0.4375	1	0.89884612244898	0.903832	0.13500693877551	0.853011102040816	0.389999673469388	1	0.102650607765256	0.100856964519843	0.0636681222951117	0.130103373143979	0.0423790449114384
590	5 vs. 12	2	0.9925	0.9949	0.0596	0.9412	0.2917	2	0.98733412244898	0.985032326530612	0.0720954285714286	0.92485012244898	0.374998775510204	2	0.0100464514953486	0.0123890461273489	0.0270997599415362	0.0467822755882719	0.0481111504828868
591	5 vs. 12	3	0.7304	0.7465	0.2191	0.6207	0.3958	3	0.755337551020408	0.757762775510204	0.185275510204082	0.653356163265306	0.506666612244898	3	0.215412445918853	0.212311770503312	0.0832591056930451	0.204524859292461	0.0496309945955463
592	5 vs. 13	1	0.7666	0.7648	0.2171	0.7586	0.3958	1	0.89884612244898	0.903832	0.13500693877551	0.853011102040816	0.389999673469388	1	0.102650607765256	0.100856964519843	0.0636681222951117	0.130103373143979	0.0423790449114384
593	5 vs. 13	2	0.9762	0.9706	0.1056	0.8	0.375	2	0.98733412244898	0.985032326530612	0.0720954285714286	0.92485012244898	0.374998775510204	2	0.0100464514953486	0.0123890461273489	0.0270997599415362	0.0467822755882719	0.0481111504828868
594	5 vs. 13	3	0.332	0.3317	0.3459	0.2143	0.4167	3	0.755337551020408	0.757762775510204	0.185275510204082	0.653356163265306	0.506666612244898	3	0.215412445918853	0.212311770503312	0.0832591056930451	0.204524859292461	0.0496309945955463
595	5 vs. 14	1	0.9289	0.9294	0.1259	0.8889	0.4375	1	0.89884612244898	0.903832	0.13500693877551	0.853011102040816	0.389999673469388	1	0.102650607765256	0.100856964519843	0.0636681222951117	0.130103373143979	0.0423790449114384
596	5 vs. 14	2	0.9954	0.9942	0.0465	0.9375	0.3333	2	0.98733412244898	0.985032326530612	0.0720954285714286	0.92485012244898	0.374998775510204	2	0.0100464514953486	0.0123890461273489	0.0270997599415362	0.0467822755882719	0.0481111504828868
597	5 vs. 14	3	0.8102	0.8629	0.1786	0.7143	0.4167	3	0.755337551020408	0.757762775510204	0.185275510204082	0.653356163265306	0.506666612244898	3	0.215412445918853	0.212311770503312	0.0832591056930451	0.204524859292461	0.0496309945955463
598	5 vs. 15	1	0.9566	0.9572	0.0972	0.8966	0.3958	1	0.89884612244898	0.903832	0.13500693877551	0.853011102040816	0.389999673469388	1	0.102650607765256	0.100856964519843	0.0636681222951117	0.130103373143979	0.0423790449114384
599	5 vs. 15	2	0.9925	0.9903	0.0589	0.875	0.3333	2	0.98733412244898	0.985032326530612	0.0720954285714286	0.92485012244898	0.374998775510204	2	0.0100464514953486	0.0123890461273489	0.0270997599415362	0.0467822755882719	0.0481111504828868
600	5 vs. 15	3	0.8098	0.852	0.1798	0.7586	0.3958	3	0.755337551020408	0.757762775510204	0.185275510204082	0.653356163265306	0.506666612244898	3	0.215412445918853	0.212311770503312	0.0832591056930451	0.204524859292461	0.0496309945955463
601	5 vs. 16	1	0.9532	0.9628	0.1008	0.6923	0.4583	1	0.89884612244898	0.903832	0.13500693877551	0.853011102040816	0.389999673469388	1	0.102650607765256	0.100856964519843	0.0636681222951117	0.130103373143979	0.0423790449114384
602	5 vs. 16	2	0.9949	0.9944	0.0487	0.9032	0.3542	2	0.98733412244898	0.985032326530612	0.0720954285714286	0.92485012244898	0.374998775510204	2	0.0100464514953486	0.0123890461273489	0.0270997599415362	0.0467822755882719	0.0481111504828868
603	5 vs. 16	3	0.9422	0.9499	0.0979	0.8667	0.375	3	0.755337551020408	0.757762775510204	0.185275510204082	0.653356163265306	0.506666612244898	3	0.215412445918853	0.212311770503312	0.0832591056930451	0.204524859292461	0.0496309945955463
604	5 vs. 17	1	0.9039	0.9034	0.1462	0.9286	0.4167	1	0.89884612244898	0.903832	0.13500693877551	0.853011102040816	0.389999673469388	1	0.102650607765256	0.100856964519843	0.0636681222951117	0.130103373143979	0.0423790449114384
605	5 vs. 17	2	0.9933	0.991	0.0558	0.875	0.3333	2	0.98733412244898	0.985032326530612	0.0720954285714286	0.92485012244898	0.374998775510204	2	0.0100464514953486	0.0123890461273489	0.0270997599415362	0.0467822755882719	0.0481111504828868
606	5 vs. 17	3	0.3414	0.3368	0.3498	0.3704	0.4375	3	0.755337551020408	0.757762775510204	0.185275510204082	0.653356163265306	0.506666612244898	3	0.215412445918853	0.212311770503312	0.0832591056930451	0.204524859292461	0.0496309945955463
607	5 vs. 18	1	0.9345	0.9377	0.1213	0.8276	0.3958	1	0.89884612244898	0.903832	0.13500693877551	0.853011102040816	0.389999673469388	1	0.102650607765256	0.100856964519843	0.0636681222951117	0.130103373143979	0.0423790449114384
608	5 vs. 18	2	0.9959	0.9943	0.0437	0.9375	0.3333	2	0.98733412244898	0.985032326530612	0.0720954285714286	0.92485012244898	0.374998775510204	2	0.0100464514953486	0.0123890461273489	0.0270997599415362	0.0467822755882719	0.0481111504828868
609	5 vs. 18	3	0.6825	0.6809	0.2255	0.5517	0.3958	3	0.755337551020408	0.757762775510204	0.185275510204082	0.653356163265306	0.506666612244898	3	0.215412445918853	0.212311770503312	0.0832591056930451	0.204524859292461	0.0496309945955463
610	5 vs. 19	1	0.9193	0.9188	0.1315	0.8276	0.3958	1	0.89884612244898	0.903832	0.13500693877551	0.853011102040816	0.389999673469388	1	0.102650607765256	0.100856964519843	0.0636681222951117	0.130103373143979	0.0423790449114384
611	5 vs. 19	2	0.9917	0.989	0.0622	0.9375	0.3333	2	0.98733412244898	0.985032326530612	0.0720954285714286	0.92485012244898	0.374998775510204	2	0.0100464514953486	0.0123890461273489	0.0270997599415362	0.0467822755882719	0.0481111504828868
612	5 vs. 19	3	0.7332	0.7552	0.2061	0.5333	0.375	3	0.755337551020408	0.757762775510204	0.185275510204082	0.653356163265306	0.506666612244898	3	0.215412445918853	0.212311770503312	0.0832591056930451	0.204524859292461	0.0496309945955463
613	5 vs. 20	1	0.9271	0.9293	0.1241	0.8	0.4792	1	0.89884612244898	0.903832	0.13500693877551	0.853011102040816	0.389999673469388	1	0.102650607765256	0.100856964519843	0.0636681222951117	0.130103373143979	0.0423790449114384
614	5 vs. 20	2	0.9914	0.9882	0.0629	0.8667	0.375	2	0.98733412244898	0.985032326530612	0.0720954285714286	0.92485012244898	0.374998775510204	2	0.0100464514953486	0.0123890461273489	0.0270997599415362	0.0467822755882719	0.0481111504828868
615	5 vs. 20	3	0.5413	0.5413	0.2804	0.3846	0.4583	3	0.755337551020408	0.757762775510204	0.185275510204082	0.653356163265306	0.506666612244898	3	0.215412445918853	0.212311770503312	0.0832591056930451	0.204524859292461	0.0496309945955463
616	5 vs. 21	1	0.9193	0.9282	0.1339	0.9286	0.4167	1	0.89884612244898	0.903832	0.13500693877551	0.853011102040816	0.389999673469388	1	0.102650607765256	0.100856964519843	0.0636681222951117	0.130103373143979	0.0423790449114384
617	5 vs. 21	2	0.9746	0.9781	0.1098	0.8889	0.25	2	0.98733412244898	0.985032326530612	0.0720954285714286	0.92485012244898	0.374998775510204	2	0.0100464514953486	0.0123890461273489	0.0270997599415362	0.0467822755882719	0.0481111504828868
618	5 vs. 21	3	0.8796	0.883	0.1387	0.6429	0.4167	3	0.755337551020408	0.757762775510204	0.185275510204082	0.653356163265306	0.506666612244898	3	0.215412445918853	0.212311770503312	0.0832591056930451	0.204524859292461	0.0496309945955463
619	5 vs. 22	1	0.9264	0.9271	0.1273	0.8889	0.4375	1	0.89884612244898	0.903832	0.13500693877551	0.853011102040816	0.389999673469388	1	0.102650607765256	0.100856964519843	0.0636681222951117	0.130103373143979	0.0423790449114384
620	5 vs. 22	2	0.9965	0.9951	0.0404	0.9091	0.3125	2	0.98733412244898	0.985032326530612	0.0720954285714286	0.92485012244898	0.374998775510204	2	0.0100464514953486	0.0123890461273489	0.0270997599415362	0.0467822755882719	0.0481111504828868
621	5 vs. 22	3	0.5737	0.5714	0.2658	0.4444	0.4375	3	0.755337551020408	0.757762775510204	0.185275510204082	0.653356163265306	0.506666612244898	3	0.215412445918853	0.212311770503312	0.0832591056930451	0.204524859292461	0.0496309945955463
622	5 vs. 23	1	0.9399	0.9395	0.1133	0.8667	0.375	1	0.89884612244898	0.903832	0.13500693877551	0.853011102040816	0.389999673469388	1	0.102650607765256	0.100856964519843	0.0636681222951117	0.130103373143979	0.0423790449114384
623	5 vs. 23	2	0.9936	0.991	0.0544	0.8667	0.375	2	0.98733412244898	0.985032326530612	0.0720954285714286	0.92485012244898	0.374998775510204	2	0.0100464514953486	0.0123890461273489	0.0270997599415362	0.0467822755882719	0.0481111504828868
624	5 vs. 23	3	0.6914	0.7147	0.2302	0.5714	0.4167	3	0.755337551020408	0.757762775510204	0.185275510204082	0.653356163265306	0.506666612244898	3	0.215412445918853	0.212311770503312	0.0832591056930451	0.204524859292461	0.0496309945955463
625	5 vs. 24	1	0.9452	0.9452	0.1155	0.9286	0.4167	1	0.89884612244898	0.903832	0.13500693877551	0.853011102040816	0.389999673469388	1	0.102650607765256	0.100856964519843	0.0636681222951117	0.130103373143979	0.0423790449114384
626	5 vs. 24	2	0.9947	0.993	0.0494	0.9091	0.3125	2	0.98733412244898	0.985032326530612	0.0720954285714286	0.92485012244898	0.374998775510204	2	0.0100464514953486	0.0123890461273489	0.0270997599415362	0.0467822755882719	0.0481111504828868
627	5 vs. 24	3	0.3813	0.3822	0.3351	0.3704	0.4375	3	0.755337551020408	0.757762775510204	0.185275510204082	0.653356163265306	0.506666612244898	3	0.215412445918853	0.212311770503312	0.0832591056930451	0.204524859292461	0.0496309945955463
628	5 vs. 25	1	0.9098	0.9095	0.1425	0.9286	0.4167	1	0.89884612244898	0.903832	0.13500693877551	0.853011102040816	0.389999673469388	1	0.102650607765256	0.100856964519843	0.0636681222951117	0.130103373143979	0.0423790449114384
629	5 vs. 25	2	0.9844	0.9836	0.0859	0.9091	0.3125	2	0.98733412244898	0.985032326530612	0.0720954285714286	0.92485012244898	0.374998775510204	2	0.0100464514953486	0.0123890461273489	0.0270997599415362	0.0467822755882719	0.0481111504828868
630	5 vs. 25	3	0.8634	0.863	0.1477	0.7692	0.4583	3	0.755337551020408	0.757762775510204	0.185275510204082	0.653356163265306	0.506666612244898	3	0.215412445918853	0.212311770503312	0.0832591056930451	0.204524859292461	0.0496309945955463
631	5 vs. 26	1	0.9622	0.9624	0.0943	0.8966	0.3958	1	0.89884612244898	0.903832	0.13500693877551	0.853011102040816	0.389999673469388	1	0.102650607765256	0.100856964519843	0.0636681222951117	0.130103373143979	0.0423790449114384
632	5 vs. 26	2	0.995	0.9939	0.0481	0.8387	0.3542	2	0.98733412244898	0.985032326530612	0.0720954285714286	0.92485012244898	0.374998775510204	2	0.0100464514953486	0.0123890461273489	0.0270997599415362	0.0467822755882719	0.0481111504828868
633	5 vs. 26	3	0.7092	0.7376	0.22	0.5185	0.4375	3	0.755337551020408	0.757762775510204	0.185275510204082	0.653356163265306	0.506666612244898	3	0.215412445918853	0.212311770503312	0.0832591056930451	0.204524859292461	0.0496309945955463
634	5 vs. 27	1	0.8686	0.8712	0.1686	0.7742	0.3542	1	0.89884612244898	0.903832	0.13500693877551	0.853011102040816	0.389999673469388	1	0.102650607765256	0.100856964519843	0.0636681222951117	0.130103373143979	0.0423790449114384
635	5 vs. 27	2	0.9899	0.9863	0.0686	0.9032	0.3542	2	0.98733412244898	0.985032326530612	0.0720954285714286	0.92485012244898	0.374998775510204	2	0.0100464514953486	0.0123890461273489	0.0270997599415362	0.0467822755882719	0.0481111504828868
636	5 vs. 27	3	0.9156	0.9155	0.1173	0.7407	0.4375	3	0.755337551020408	0.757762775510204	0.185275510204082	0.653356163265306	0.506666612244898	3	0.215412445918853	0.212311770503312	0.0832591056930451	0.204524859292461	0.0496309945955463
637	5 vs. 28	1	0.9894	0.9899	0.05	0.96	0.4792	1	0.89884612244898	0.903832	0.13500693877551	0.853011102040816	0.389999673469388	1	0.102650607765256	0.100856964519843	0.0636681222951117	0.130103373143979	0.0423790449114384
638	5 vs. 28	2	0.9975	0.9968	0.0346	0.9375	0.3333	2	0.98733412244898	0.985032326530612	0.0720954285714286	0.92485012244898	0.374998775510204	2	0.0100464514953486	0.0123890461273489	0.0270997599415362	0.0467822755882719	0.0481111504828868
639	5 vs. 28	3	0.891	0.9	0.1357	0.8148	0.4375	3	0.755337551020408	0.757762775510204	0.185275510204082	0.653356163265306	0.506666612244898	3	0.215412445918853	0.212311770503312	0.0832591056930451	0.204524859292461	0.0496309945955463
640	5 vs. 29	1	0.9663	0.9687	0.0845	0.8889	0.4375	1	0.89884612244898	0.903832	0.13500693877551	0.853011102040816	0.389999673469388	1	0.102650607765256	0.100856964519843	0.0636681222951117	0.130103373143979	0.0423790449114384
641	5 vs. 29	2	0.9903	0.9867	0.067	0.8667	0.375	2	0.98733412244898	0.985032326530612	0.0720954285714286	0.92485012244898	0.374998775510204	2	0.0100464514953486	0.0123890461273489	0.0270997599415362	0.0467822755882719	0.0481111504828868
642	5 vs. 29	3	0.8221	0.8403	0.1764	0.7857	0.4167	3	0.755337551020408	0.757762775510204	0.185275510204082	0.653356163265306	0.506666612244898	3	0.215412445918853	0.212311770503312	0.0832591056930451	0.204524859292461	0.0496309945955463
643	5 vs. 30	1	0.9344	0.9417	0.1232	0.8889	0.4375	1	0.89884612244898	0.903832	0.13500693877551	0.853011102040816	0.389999673469388	1	0.102650607765256	0.100856964519843	0.0636681222951117	0.130103373143979	0.0423790449114384
644	5 vs. 30	2	0.9892	0.9933	0.0715	0.9412	0.2917	2	0.98733412244898	0.985032326530612	0.0720954285714286	0.92485012244898	0.374998775510204	2	0.0100464514953486	0.0123890461273489	0.0270997599415362	0.0467822755882719	0.0481111504828868
645	5 vs. 30	3	0.0526	0.0361	0.3893	0	0.4792	3	0.755337551020408	0.757762775510204	0.185275510204082	0.653356163265306	0.506666612244898	3	0.215412445918853	0.212311770503312	0.0832591056930451	0.204524859292461	0.0496309945955463
646	5 vs. 31	1	0.9691	0.9699	0.0813	0.8889	0.4375	1	0.89884612244898	0.903832	0.13500693877551	0.853011102040816	0.389999673469388	1	0.102650607765256	0.100856964519843	0.0636681222951117	0.130103373143979	0.0423790449114384
647	5 vs. 31	2	0.9941	0.9941	0.0521	0.8387	0.3542	2	0.98733412244898	0.985032326530612	0.0720954285714286	0.92485012244898	0.374998775510204	2	0.0100464514953486	0.0123890461273489	0.0270997599415362	0.0467822755882719	0.0481111504828868
648	5 vs. 31	3	0.5021	0.5174	0.298	0.3448	0.3958	3	0.755337551020408	0.757762775510204	0.185275510204082	0.653356163265306	0.506666612244898	3	0.215412445918853	0.212311770503312	0.0832591056930451	0.204524859292461	0.0496309945955463
649	5 vs. 32	1	0.8798	0.8868	0.1626	0.8889	0.4375	1	0.89884612244898	0.903832	0.13500693877551	0.853011102040816	0.389999673469388	1	0.102650607765256	0.100856964519843	0.0636681222951117	0.130103373143979	0.0423790449114384
650	5 vs. 32	2	0.993	0.9949	0.0572	0.9697	0.3125	2	0.98733412244898	0.985032326530612	0.0720954285714286	0.92485012244898	0.374998775510204	2	0.0100464514953486	0.0123890461273489	0.0270997599415362	0.0467822755882719	0.0481111504828868
651	5 vs. 32	3	0.814	0.8218	0.1748	0.7143	0.4167	3	0.755337551020408	0.757762775510204	0.185275510204082	0.653356163265306	0.506666612244898	3	0.215412445918853	0.212311770503312	0.0832591056930451	0.204524859292461	0.0496309945955463
652	5 vs. 33	1	0.8244	0.835	0.1897	0.5833	0.5	1	0.89884612244898	0.903832	0.13500693877551	0.853011102040816	0.389999673469388	1	0.102650607765256	0.100856964519843	0.0636681222951117	0.130103373143979	0.0423790449114384
653	5 vs. 33	2	0.9875	0.9827	0.0759	0.8667	0.375	2	0.98733412244898	0.985032326530612	0.0720954285714286	0.92485012244898	0.374998775510204	2	0.0100464514953486	0.0123890461273489	0.0270997599415362	0.0467822755882719	0.0481111504828868
654	5 vs. 33	3	0.8751	0.8808	0.1423	0.7143	0.4167	3	0.755337551020408	0.757762775510204	0.185275510204082	0.653356163265306	0.506666612244898	3	0.215412445918853	0.212311770503312	0.0832591056930451	0.204524859292461	0.0496309945955463
655	5 vs. 34	1	0.9279	0.9305	0.128	0.8889	0.4375	1	0.89884612244898	0.903832	0.13500693877551	0.853011102040816	0.389999673469388	1	0.102650607765256	0.100856964519843	0.0636681222951117	0.130103373143979	0.0423790449114384
656	5 vs. 34	2	0.9966	0.9967	0.0395	0.9375	0.3333	2	0.98733412244898	0.985032326530612	0.0720954285714286	0.92485012244898	0.374998775510204	2	0.0100464514953486	0.0123890461273489	0.0270997599415362	0.0467822755882719	0.0481111504828868
657	5 vs. 34	3	0.7831	0.8088	0.1906	0.7143	0.4167	3	0.755337551020408	0.757762775510204	0.185275510204082	0.653356163265306	0.506666612244898	3	0.215412445918853	0.212311770503312	0.0832591056930451	0.204524859292461	0.0496309945955463
658	5 vs. 35	1	0.8672	0.8666	0.1732	0.8276	0.3958	1	0.89884612244898	0.903832	0.13500693877551	0.853011102040816	0.389999673469388	1	0.102650607765256	0.100856964519843	0.0636681222951117	0.130103373143979	0.0423790449114384
659	5 vs. 35	2	0.9903	0.989	0.0683	0.9091	0.3125	2	0.98733412244898	0.985032326530612	0.0720954285714286	0.92485012244898	0.374998775510204	2	0.0100464514953486	0.0123890461273489	0.0270997599415362	0.0467822755882719	0.0481111504828868
660	5 vs. 35	3	0.7174	0.7212	0.2188	0.6429	0.4167	3	0.755337551020408	0.757762775510204	0.185275510204082	0.653356163265306	0.506666612244898	3	0.215412445918853	0.212311770503312	0.0832591056930451	0.204524859292461	0.0496309945955463
661	5 vs. 36	1	0.9214	0.9245	0.1343	0.8966	0.3958	1	0.89884612244898	0.903832	0.13500693877551	0.853011102040816	0.389999673469388	1	0.102650607765256	0.100856964519843	0.0636681222951117	0.130103373143979	0.0423790449114384
662	5 vs. 36	2	0.9912	0.9921	0.0646	0.9143	0.2708	2	0.98733412244898	0.985032326530612	0.0720954285714286	0.92485012244898	0.374998775510204	2	0.0100464514953486	0.0123890461273489	0.0270997599415362	0.0467822755882719	0.0481111504828868
663	5 vs. 36	3	0.3983	0.4004	0.3229	0.3846	0.4583	3	0.755337551020408	0.757762775510204	0.185275510204082	0.653356163265306	0.506666612244898	3	0.215412445918853	0.212311770503312	0.0832591056930451	0.204524859292461	0.0496309945955463
664	5 vs. 37	1	0.9537	0.9575	0.1003	0.8276	0.3958	1	0.89884612244898	0.903832	0.13500693877551	0.853011102040816	0.389999673469388	1	0.102650607765256	0.100856964519843	0.0636681222951117	0.130103373143979	0.0423790449114384
665	5 vs. 37	2	0.994	0.9919	0.0528	0.8667	0.375	2	0.98733412244898	0.985032326530612	0.0720954285714286	0.92485012244898	0.374998775510204	2	0.0100464514953486	0.0123890461273489	0.0270997599415362	0.0467822755882719	0.0481111504828868
666	5 vs. 37	3	0.8924	0.9131	0.1338	0.8966	0.3958	3	0.755337551020408	0.757762775510204	0.185275510204082	0.653356163265306	0.506666612244898	3	0.215412445918853	0.212311770503312	0.0832591056930451	0.204524859292461	0.0496309945955463
667	5 vs. 38	1	0.9662	0.9661	0.0867	0.9286	0.4167	1	0.89884612244898	0.903832	0.13500693877551	0.853011102040816	0.389999673469388	1	0.102650607765256	0.100856964519843	0.0636681222951117	0.130103373143979	0.0423790449114384
668	5 vs. 38	2	0.995	0.9966	0.0487	0.9412	0.2917	2	0.98733412244898	0.985032326530612	0.0720954285714286	0.92485012244898	0.374998775510204	2	0.0100464514953486	0.0123890461273489	0.0270997599415362	0.0467822755882719	0.0481111504828868
669	5 vs. 38	3	0.8303	0.8293	0.1655	0.7692	0.4583	3	0.755337551020408	0.757762775510204	0.185275510204082	0.653356163265306	0.506666612244898	3	0.215412445918853	0.212311770503312	0.0832591056930451	0.204524859292461	0.0496309945955463
670	5 vs. 39	1	0.943	0.9429	0.1112	0.9286	0.4167	1	0.89884612244898	0.903832	0.13500693877551	0.853011102040816	0.389999673469388	1	0.102650607765256	0.100856964519843	0.0636681222951117	0.130103373143979	0.0423790449114384
671	5 vs. 39	2	0.9924	0.9908	0.0602	0.9091	0.3125	2	0.98733412244898	0.985032326530612	0.0720954285714286	0.92485012244898	0.374998775510204	2	0.0100464514953486	0.0123890461273489	0.0270997599415362	0.0467822755882719	0.0481111504828868
672	5 vs. 39	3	0.0203	0.0633	0.4242	0.1481	0.4375	3	0.755337551020408	0.757762775510204	0.185275510204082	0.653356163265306	0.506666612244898	3	0.215412445918853	0.212311770503312	0.0832591056930451	0.204524859292461	0.0496309945955463
673	5 vs. 40	1	0.8603	0.8739	0.1802	0.8571	0.4167	1	0.89884612244898	0.903832	0.13500693877551	0.853011102040816	0.389999673469388	1	0.102650607765256	0.100856964519843	0.0636681222951117	0.130103373143979	0.0423790449114384
674	5 vs. 40	2	0.9821	0.9838	0.0922	0.8571	0.2708	2	0.98733412244898	0.985032326530612	0.0720954285714286	0.92485012244898	0.374998775510204	2	0.0100464514953486	0.0123890461273489	0.0270997599415362	0.0467822755882719	0.0481111504828868
675	5 vs. 40	3	0.6034	0.6184	0.2655	0.4444	0.4375	3	0.755337551020408	0.757762775510204	0.185275510204082	0.653356163265306	0.506666612244898	3	0.215412445918853	0.212311770503312	0.0832591056930451	0.204524859292461	0.0496309945955463
676	5 vs. 41	1	0.9087	0.9112	0.1445	0.9286	0.4167	1	0.89884612244898	0.903832	0.13500693877551	0.853011102040816	0.389999673469388	1	0.102650607765256	0.100856964519843	0.0636681222951117	0.130103373143979	0.0423790449114384
677	5 vs. 41	2	0.9909	0.991	0.0656	0.9375	0.3333	2	0.98733412244898	0.985032326530612	0.0720954285714286	0.92485012244898	0.374998775510204	2	0.0100464514953486	0.0123890461273489	0.0270997599415362	0.0467822755882719	0.0481111504828868
678	5 vs. 41	3	0.6704	0.6836	0.2395	0.4667	0.375	3	0.755337551020408	0.757762775510204	0.185275510204082	0.653356163265306	0.506666612244898	3	0.215412445918853	0.212311770503312	0.0832591056930451	0.204524859292461	0.0496309945955463
679	5 vs. 42	1	0.976	0.9758	0.0718	0.9231	0.4583	1	0.89884612244898	0.903832	0.13500693877551	0.853011102040816	0.389999673469388	1	0.102650607765256	0.100856964519843	0.0636681222951117	0.130103373143979	0.0423790449114384
680	5 vs. 42	2	0.9928	0.9902	0.0576	0.8387	0.3542	2	0.98733412244898	0.985032326530612	0.0720954285714286	0.92485012244898	0.374998775510204	2	0.0100464514953486	0.0123890461273489	0.0270997599415362	0.0467822755882719	0.0481111504828868
681	5 vs. 42	3	0.5894	0.5925	0.2578	0.4444	0.4375	3	0.755337551020408	0.757762775510204	0.185275510204082	0.653356163265306	0.506666612244898	3	0.215412445918853	0.212311770503312	0.0832591056930451	0.204524859292461	0.0496309945955463
682	5 vs. 43	1	0.9518	0.9518	0.1038	0.8889	0.4375	1	0.89884612244898	0.903832	0.13500693877551	0.853011102040816	0.389999673469388	1	0.102650607765256	0.100856964519843	0.0636681222951117	0.130103373143979	0.0423790449114384
683	5 vs. 43	2	0.9889	0.9865	0.0733	0.9091	0.3125	2	0.98733412244898	0.985032326530612	0.0720954285714286	0.92485012244898	0.374998775510204	2	0.0100464514953486	0.0123890461273489	0.0270997599415362	0.0467822755882719	0.0481111504828868
684	5 vs. 43	3	0.5905	0.6108	0.266	0.5517	0.3958	3	0.755337551020408	0.757762775510204	0.185275510204082	0.653356163265306	0.506666612244898	3	0.215412445918853	0.212311770503312	0.0832591056930451	0.204524859292461	0.0496309945955463
685	5 vs. 44	1	0.8194	0.8211	0.1889	0.6667	0.5	1	0.89884612244898	0.903832	0.13500693877551	0.853011102040816	0.389999673469388	1	0.102650607765256	0.100856964519843	0.0636681222951117	0.130103373143979	0.0423790449114384
686	5 vs. 44	2	0.994	0.9917	0.0532	0.8667	0.375	2	0.98733412244898	0.985032326530612	0.0720954285714286	0.92485012244898	0.374998775510204	2	0.0100464514953486	0.0123890461273489	0.0270997599415362	0.0467822755882719	0.0481111504828868
687	5 vs. 44	3	0.6785	0.6941	0.2332	0.5333	0.375	3	0.755337551020408	0.757762775510204	0.185275510204082	0.653356163265306	0.506666612244898	3	0.215412445918853	0.212311770503312	0.0832591056930451	0.204524859292461	0.0496309945955463
688	5 vs. 45	1	0.9017	0.9048	0.151	0.8571	0.4167	1	0.89884612244898	0.903832	0.13500693877551	0.853011102040816	0.389999673469388	1	0.102650607765256	0.100856964519843	0.0636681222951117	0.130103373143979	0.0423790449114384
689	5 vs. 45	2	0.9904	0.9902	0.0674	0.9412	0.2917	2	0.98733412244898	0.985032326530612	0.0720954285714286	0.92485012244898	0.374998775510204	2	0.0100464514953486	0.0123890461273489	0.0270997599415362	0.0467822755882719	0.0481111504828868
690	5 vs. 45	3	0.377	0.4018	0.3392	0.4615	0.4583	3	0.755337551020408	0.757762775510204	0.185275510204082	0.653356163265306	0.506666612244898	3	0.215412445918853	0.212311770503312	0.0832591056930451	0.204524859292461	0.0496309945955463
691	5 vs. 46	1	0.9158	0.9153	0.1308	0.8571	0.4167	1	0.89884612244898	0.903832	0.13500693877551	0.853011102040816	0.389999673469388	1	0.102650607765256	0.100856964519843	0.0636681222951117	0.130103373143979	0.0423790449114384
692	5 vs. 46	2	0.9835	0.9778	0.0872	0.875	0.3333	2	0.98733412244898	0.985032326530612	0.0720954285714286	0.92485012244898	0.374998775510204	2	0.0100464514953486	0.0123890461273489	0.0270997599415362	0.0467822755882719	0.0481111504828868
693	5 vs. 46	3	0.8869	0.9025	0.1351	0.72	0.4792	3	0.755337551020408	0.757762775510204	0.185275510204082	0.653356163265306	0.506666612244898	3	0.215412445918853	0.212311770503312	0.0832591056930451	0.204524859292461	0.0496309945955463
694	5 vs. 47	1	0.9109	0.9107	0.142	0.8667	0.375	1	0.89884612244898	0.903832	0.13500693877551	0.853011102040816	0.389999673469388	1	0.102650607765256	0.100856964519843	0.0636681222951117	0.130103373143979	0.0423790449114384
695	5 vs. 47	2	0.9914	0.9898	0.0636	0.9091	0.3125	2	0.98733412244898	0.985032326530612	0.0720954285714286	0.92485012244898	0.374998775510204	2	0.0100464514953486	0.0123890461273489	0.0270997599415362	0.0467822755882719	0.0481111504828868
696	5 vs. 47	3	0.5117	0.5304	0.2919	0.4286	0.4167	3	0.755337551020408	0.757762775510204	0.185275510204082	0.653356163265306	0.506666612244898	3	0.215412445918853	0.212311770503312	0.0832591056930451	0.204524859292461	0.0496309945955463
697	5 vs. 48	1	0.8907	0.8899	0.1506	0.7586	0.3958	1	0.89884612244898	0.903832	0.13500693877551	0.853011102040816	0.389999673469388	1	0.102650607765256	0.100856964519843	0.0636681222951117	0.130103373143979	0.0423790449114384
698	5 vs. 48	2	0.9802	0.9733	0.0954	0.8667	0.375	2	0.98733412244898	0.985032326530612	0.0720954285714286	0.92485012244898	0.374998775510204	2	0.0100464514953486	0.0123890461273489	0.0270997599415362	0.0467822755882719	0.0481111504828868
699	5 vs. 48	3	0.5747	0.5752	0.2592	0.5217	0.5208	3	0.755337551020408	0.757762775510204	0.185275510204082	0.653356163265306	0.506666612244898	3	0.215412445918853	0.212311770503312	0.0832591056930451	0.204524859292461	0.0496309945955463
700	5 vs. 49	1	0.889	0.8899	0.1624	0.9286	0.4167	1	0.89884612244898	0.903832	0.13500693877551	0.853011102040816	0.389999673469388	1	0.102650607765256	0.100856964519843	0.0636681222951117	0.130103373143979	0.0423790449114384
701	5 vs. 49	2	0.9931	0.9926	0.0576	0.9091	0.3125	2	0.98733412244898	0.985032326530612	0.0720954285714286	0.92485012244898	0.374998775510204	2	0.0100464514953486	0.0123890461273489	0.0270997599415362	0.0467822755882719	0.0481111504828868
702	5 vs. 49	3	0.54	0.5687	0.2887	0.4444	0.4375	3	0.755337551020408	0.757762775510204	0.185275510204082	0.653356163265306	0.506666612244898	3	0.215412445918853	0.212311770503312	0.0832591056930451	0.204524859292461	0.0496309945955463
703	5 vs. 50	1	0.8921	0.904	0.1515	0.7143	0.4167	1	0.89884612244898	0.903832	0.13500693877551	0.853011102040816	0.389999673469388	1	0.102650607765256	0.100856964519843	0.0636681222951117	0.130103373143979	0.0423790449114384
704	5 vs. 50	2	0.9875	0.9825	0.0759	0.8667	0.375	2	0.98733412244898	0.985032326530612	0.0720954285714286	0.92485012244898	0.374998775510204	2	0.0100464514953486	0.0123890461273489	0.0270997599415362	0.0467822755882719	0.0481111504828868
705	5 vs. 50	3	0.8397	0.8452	0.1641	0.7742	0.3542	3	0.755337551020408	0.757762775510204	0.185275510204082	0.653356163265306	0.506666612244898	3	0.215412445918853	0.212311770503312	0.0832591056930451	0.204524859292461	0.0496309945955463
706	6 vs. 7	1	0.9055	0.9103	0.1462	0.8966	0.3958	1	0.89884612244898	0.903832	0.13500693877551	0.853011102040816	0.389999673469388	1	0.102650607765256	0.100856964519843	0.0636681222951117	0.130103373143979	0.0423790449114384
707	6 vs. 7	2	0.9913	0.9877	0.0635	0.9286	0.4167	2	0.98733412244898	0.985032326530612	0.0720954285714286	0.92485012244898	0.374998775510204	2	0.0100464514953486	0.0123890461273489	0.0270997599415362	0.0467822755882719	0.0481111504828868
708	6 vs. 7	3	0.7918	0.7736	0.194	0.7826	0.5208	3	0.755337551020408	0.757762775510204	0.185275510204082	0.653356163265306	0.506666612244898	3	0.215412445918853	0.212311770503312	0.0832591056930451	0.204524859292461	0.0496309945955463
709	6 vs. 8	1	0.7944	0.7916	0.2114	0.9286	0.4167	1	0.89884612244898	0.903832	0.13500693877551	0.853011102040816	0.389999673469388	1	0.102650607765256	0.100856964519843	0.0636681222951117	0.130103373143979	0.0423790449114384
710	6 vs. 8	2	0.9738	0.9653	0.1096	0.8966	0.3958	2	0.98733412244898	0.985032326530612	0.0720954285714286	0.92485012244898	0.374998775510204	2	0.0100464514953486	0.0123890461273489	0.0270997599415362	0.0467822755882719	0.0481111504828868
711	6 vs. 8	3	0.9327	0.918	0.1111	0.9091	0.5417	3	0.755337551020408	0.757762775510204	0.185275510204082	0.653356163265306	0.506666612244898	3	0.215412445918853	0.212311770503312	0.0832591056930451	0.204524859292461	0.0496309945955463
712	6 vs. 9	1	0.8013	0.8049	0.2103	0.7857	0.4167	1	0.89884612244898	0.903832	0.13500693877551	0.853011102040816	0.389999673469388	1	0.102650607765256	0.100856964519843	0.0636681222951117	0.130103373143979	0.0423790449114384
713	6 vs. 9	2	0.9731	0.9622	0.1113	0.9286	0.4167	2	0.98733412244898	0.985032326530612	0.0720954285714286	0.92485012244898	0.374998775510204	2	0.0100464514953486	0.0123890461273489	0.0270997599415362	0.0467822755882719	0.0481111504828868
714	6 vs. 9	3	0.2224	0.2076	0.3676	0.3478	0.5208	3	0.755337551020408	0.757762775510204	0.185275510204082	0.653356163265306	0.506666612244898	3	0.215412445918853	0.212311770503312	0.0832591056930451	0.204524859292461	0.0496309945955463
715	6 vs. 10	1	0.8359	0.8481	0.1915	0.8276	0.3958	1	0.89884612244898	0.903832	0.13500693877551	0.853011102040816	0.389999673469388	1	0.102650607765256	0.100856964519843	0.0636681222951117	0.130103373143979	0.0423790449114384
716	6 vs. 10	2	0.9911	0.9875	0.0642	0.9286	0.4167	2	0.98733412244898	0.985032326530612	0.0720954285714286	0.92485012244898	0.374998775510204	2	0.0100464514953486	0.0123890461273489	0.0270997599415362	0.0467822755882719	0.0481111504828868
717	6 vs. 10	3	0.5794	0.531	0.2722	0.5217	0.5208	3	0.755337551020408	0.757762775510204	0.185275510204082	0.653356163265306	0.506666612244898	3	0.215412445918853	0.212311770503312	0.0832591056930451	0.204524859292461	0.0496309945955463
718	6 vs. 11	1	0.9559	0.9575	0.1017	1	0.375	1	0.89884612244898	0.903832	0.13500693877551	0.853011102040816	0.389999673469388	1	0.102650607765256	0.100856964519843	0.0636681222951117	0.130103373143979	0.0423790449114384
719	6 vs. 11	2	0.9909	0.9879	0.0648	0.8966	0.3958	2	0.98733412244898	0.985032326530612	0.0720954285714286	0.92485012244898	0.374998775510204	2	0.0100464514953486	0.0123890461273489	0.0270997599415362	0.0467822755882719	0.0481111504828868
720	6 vs. 11	3	0.886	0.8631	0.1459	0.8333	0.5	3	0.755337551020408	0.757762775510204	0.185275510204082	0.653356163265306	0.506666612244898	3	0.215412445918853	0.212311770503312	0.0832591056930451	0.204524859292461	0.0496309945955463
721	6 vs. 12	1	0.9829	0.9833	0.0647	0.8966	0.3958	1	0.89884612244898	0.903832	0.13500693877551	0.853011102040816	0.389999673469388	1	0.102650607765256	0.100856964519843	0.0636681222951117	0.130103373143979	0.0423790449114384
722	6 vs. 12	2	0.9907	0.9922	0.0662	0.9375	0.3333	2	0.98733412244898	0.985032326530612	0.0720954285714286	0.92485012244898	0.374998775510204	2	0.0100464514953486	0.0123890461273489	0.0270997599415362	0.0467822755882719	0.0481111504828868
723	6 vs. 12	3	0.8065	0.7813	0.1902	0.7826	0.5208	3	0.755337551020408	0.757762775510204	0.185275510204082	0.653356163265306	0.506666612244898	3	0.215412445918853	0.212311770503312	0.0832591056930451	0.204524859292461	0.0496309945955463
724	6 vs. 13	1	0.7682	0.7658	0.2247	0.8387	0.3542	1	0.89884612244898	0.903832	0.13500693877551	0.853011102040816	0.389999673469388	1	0.102650607765256	0.100856964519843	0.0636681222951117	0.130103373143979	0.0423790449114384
725	6 vs. 13	2	0.9831	0.9797	0.0891	0.8571	0.4167	2	0.98733412244898	0.985032326530612	0.0720954285714286	0.92485012244898	0.374998775510204	2	0.0100464514953486	0.0123890461273489	0.0270997599415362	0.0467822755882719	0.0481111504828868
726	6 vs. 13	3	0.9018	0.8754	0.136	0.8182	0.5417	3	0.755337551020408	0.757762775510204	0.185275510204082	0.653356163265306	0.506666612244898	3	0.215412445918853	0.212311770503312	0.0832591056930451	0.204524859292461	0.0496309945955463
727	6 vs. 14	1	0.9841	0.9839	0.061	0.9655	0.3958	1	0.89884612244898	0.903832	0.13500693877551	0.853011102040816	0.389999673469388	1	0.102650607765256	0.100856964519843	0.0636681222951117	0.130103373143979	0.0423790449114384
728	6 vs. 14	2	0.9932	0.9911	0.0563	1	0.375	2	0.98733412244898	0.985032326530612	0.0720954285714286	0.92485012244898	0.374998775510204	2	0.0100464514953486	0.0123890461273489	0.0270997599415362	0.0467822755882719	0.0481111504828868
729	6 vs. 14	3	0.683	0.6039	0.2376	0.5455	0.5417	3	0.755337551020408	0.757762775510204	0.185275510204082	0.653356163265306	0.506666612244898	3	0.215412445918853	0.212311770503312	0.0832591056930451	0.204524859292461	0.0496309945955463
730	6 vs. 15	1	0.9583	0.9577	0.0984	0.9677	0.3542	1	0.89884612244898	0.903832	0.13500693877551	0.853011102040816	0.389999673469388	1	0.102650607765256	0.100856964519843	0.0636681222951117	0.130103373143979	0.0423790449114384
731	6 vs. 15	2	0.9927	0.9904	0.0581	0.9333	0.375	2	0.98733412244898	0.985032326530612	0.0720954285714286	0.92485012244898	0.374998775510204	2	0.0100464514953486	0.0123890461273489	0.0270997599415362	0.0467822755882719	0.0481111504828868
732	6 vs. 15	3	0.6664	0.5912	0.2449	0.6087	0.5208	3	0.755337551020408	0.757762775510204	0.185275510204082	0.653356163265306	0.506666612244898	3	0.215412445918853	0.212311770503312	0.0832591056930451	0.204524859292461	0.0496309945955463
733	6 vs. 16	1	0.881	0.9013	0.1654	0.7857	0.4167	1	0.89884612244898	0.903832	0.13500693877551	0.853011102040816	0.389999673469388	1	0.102650607765256	0.100856964519843	0.0636681222951117	0.130103373143979	0.0423790449114384
734	6 vs. 16	2	0.9879	0.9845	0.0748	0.8966	0.3958	2	0.98733412244898	0.985032326530612	0.0720954285714286	0.92485012244898	0.374998775510204	2	0.0100464514953486	0.0123890461273489	0.0270997599415362	0.0467822755882719	0.0481111504828868
735	6 vs. 16	3	0.0171	0.0019	0.4195	0.0833	0.5	3	0.755337551020408	0.757762775510204	0.185275510204082	0.653356163265306	0.506666612244898	3	0.215412445918853	0.212311770503312	0.0832591056930451	0.204524859292461	0.0496309945955463
736	6 vs. 17	1	0.982	0.9824	0.065	1	0.375	1	0.89884612244898	0.903832	0.13500693877551	0.853011102040816	0.389999673469388	1	0.102650607765256	0.100856964519843	0.0636681222951117	0.130103373143979	0.0423790449114384
737	6 vs. 17	2	0.992	0.9891	0.0611	0.9333	0.375	2	0.98733412244898	0.985032326530612	0.0720954285714286	0.92485012244898	0.374998775510204	2	0.0100464514953486	0.0123890461273489	0.0270997599415362	0.0467822755882719	0.0481111504828868
738	6 vs. 17	3	0.9771	0.9742	0.0674	0.9524	0.5625	3	0.755337551020408	0.757762775510204	0.185275510204082	0.653356163265306	0.506666612244898	3	0.215412445918853	0.212311770503312	0.0832591056930451	0.204524859292461	0.0496309945955463
739	6 vs. 18	1	0.9458	0.9567	0.1127	0.9032	0.3542	1	0.89884612244898	0.903832	0.13500693877551	0.853011102040816	0.389999673469388	1	0.102650607765256	0.100856964519843	0.0636681222951117	0.130103373143979	0.0423790449114384
740	6 vs. 18	2	0.9965	0.9953	0.0401	1	0.375	2	0.98733412244898	0.985032326530612	0.0720954285714286	0.92485012244898	0.374998775510204	2	0.0100464514953486	0.0123890461273489	0.0270997599415362	0.0467822755882719	0.0481111504828868
741	6 vs. 18	3	0.7065	0.7125	0.2245	0.6957	0.5208	3	0.755337551020408	0.757762775510204	0.185275510204082	0.653356163265306	0.506666612244898	3	0.215412445918853	0.212311770503312	0.0832591056930451	0.204524859292461	0.0496309945955463
742	6 vs. 19	1	0.9622	0.9639	0.0936	0.9032	0.3542	1	0.89884612244898	0.903832	0.13500693877551	0.853011102040816	0.389999673469388	1	0.102650607765256	0.100856964519843	0.0636681222951117	0.130103373143979	0.0423790449114384
743	6 vs. 19	2	0.9948	0.9932	0.0494	1	0.375	2	0.98733412244898	0.985032326530612	0.0720954285714286	0.92485012244898	0.374998775510204	2	0.0100464514953486	0.0123890461273489	0.0270997599415362	0.0467822755882719	0.0481111504828868
744	6 vs. 19	3	0.722	0.6726	0.218	0.6667	0.5	3	0.755337551020408	0.757762775510204	0.185275510204082	0.653356163265306	0.506666612244898	3	0.215412445918853	0.212311770503312	0.0832591056930451	0.204524859292461	0.0496309945955463
745	6 vs. 20	1	0.952	0.9611	0.1053	0.8889	0.4375	1	0.89884612244898	0.903832	0.13500693877551	0.853011102040816	0.389999673469388	1	0.102650607765256	0.100856964519843	0.0636681222951117	0.130103373143979	0.0423790449114384
746	6 vs. 20	2	0.9923	0.9895	0.0597	0.9286	0.4167	2	0.98733412244898	0.985032326530612	0.0720954285714286	0.92485012244898	0.374998775510204	2	0.0100464514953486	0.0123890461273489	0.0270997599415362	0.0467822755882719	0.0481111504828868
747	6 vs. 20	3	0.8989	0.9018	0.1358	0.9	0.5833	3	0.755337551020408	0.757762775510204	0.185275510204082	0.653356163265306	0.506666612244898	3	0.215412445918853	0.212311770503312	0.0832591056930451	0.204524859292461	0.0496309945955463
748	6 vs. 21	1	0.9715	0.9738	0.0816	1	0.375	1	0.89884612244898	0.903832	0.13500693877551	0.853011102040816	0.389999673469388	1	0.102650607765256	0.100856964519843	0.0636681222951117	0.130103373143979	0.0423790449114384
749	6 vs. 21	2	0.9808	0.9857	0.0955	0.8824	0.2917	2	0.98733412244898	0.985032326530612	0.0720954285714286	0.92485012244898	0.374998775510204	2	0.0100464514953486	0.0123890461273489	0.0270997599415362	0.0467822755882719	0.0481111504828868
750	6 vs. 21	3	0.02	0.0237	0.3955	0.1818	0.5417	3	0.755337551020408	0.757762775510204	0.185275510204082	0.653356163265306	0.506666612244898	3	0.215412445918853	0.212311770503312	0.0832591056930451	0.204524859292461	0.0496309945955463
751	6 vs. 22	1	0.9792	0.9854	0.0698	0.9655	0.3958	1	0.89884612244898	0.903832	0.13500693877551	0.853011102040816	0.389999673469388	1	0.102650607765256	0.100856964519843	0.0636681222951117	0.130103373143979	0.0423790449114384
752	6 vs. 22	2	0.9936	0.9911	0.0542	0.9677	0.3542	2	0.98733412244898	0.985032326530612	0.0720954285714286	0.92485012244898	0.374998775510204	2	0.0100464514953486	0.0123890461273489	0.0270997599415362	0.0467822755882719	0.0481111504828868
753	6 vs. 22	3	0.8604	0.8734	0.1578	0.8571	0.5625	3	0.755337551020408	0.757762775510204	0.185275510204082	0.653356163265306	0.506666612244898	3	0.215412445918853	0.212311770503312	0.0832591056930451	0.204524859292461	0.0496309945955463
754	6 vs. 23	1	0.9251	0.9264	0.131	0.9375	0.3333	1	0.89884612244898	0.903832	0.13500693877551	0.853011102040816	0.389999673469388	1	0.102650607765256	0.100856964519843	0.0636681222951117	0.130103373143979	0.0423790449114384
755	6 vs. 23	2	0.9956	0.9938	0.0451	0.9286	0.4167	2	0.98733412244898	0.985032326530612	0.0720954285714286	0.92485012244898	0.374998775510204	2	0.0100464514953486	0.0123890461273489	0.0270997599415362	0.0467822755882719	0.0481111504828868
756	6 vs. 23	3	0.8396	0.8099	0.1708	0.7273	0.5417	3	0.755337551020408	0.757762775510204	0.185275510204082	0.653356163265306	0.506666612244898	3	0.215412445918853	0.212311770503312	0.0832591056930451	0.204524859292461	0.0496309945955463
757	6 vs. 24	1	0.9842	0.9846	0.0625	1	0.375	1	0.89884612244898	0.903832	0.13500693877551	0.853011102040816	0.389999673469388	1	0.102650607765256	0.100856964519843	0.0636681222951117	0.130103373143979	0.0423790449114384
758	6 vs. 24	2	0.9928	0.9902	0.0578	0.9677	0.3542	2	0.98733412244898	0.985032326530612	0.0720954285714286	0.92485012244898	0.374998775510204	2	0.0100464514953486	0.0123890461273489	0.0270997599415362	0.0467822755882719	0.0481111504828868
759	6 vs. 24	3	0.9693	0.9632	0.0766	0.9524	0.5625	3	0.755337551020408	0.757762775510204	0.185275510204082	0.653356163265306	0.506666612244898	3	0.215412445918853	0.212311770503312	0.0832591056930451	0.204524859292461	0.0496309945955463
760	6 vs. 25	1	0.9749	0.9783	0.0768	1	0.375	1	0.89884612244898	0.903832	0.13500693877551	0.853011102040816	0.389999673469388	1	0.102650607765256	0.100856964519843	0.0636681222951117	0.130103373143979	0.0423790449114384
761	6 vs. 25	2	0.9895	0.9902	0.0706	0.9677	0.3542	2	0.98733412244898	0.985032326530612	0.0720954285714286	0.92485012244898	0.374998775510204	2	0.0100464514953486	0.0123890461273489	0.0270997599415362	0.0467822755882719	0.0481111504828868
762	6 vs. 25	3	0.487	0.5173	0.2922	0.5	0.5833	3	0.755337551020408	0.757762775510204	0.185275510204082	0.653356163265306	0.506666612244898	3	0.215412445918853	0.212311770503312	0.0832591056930451	0.204524859292461	0.0496309945955463
763	6 vs. 26	1	0.9642	0.9641	0.0922	0.9677	0.3542	1	0.89884612244898	0.903832	0.13500693877551	0.853011102040816	0.389999673469388	1	0.102650607765256	0.100856964519843	0.0636681222951117	0.130103373143979	0.0423790449114384
764	6 vs. 26	2	0.9921	0.9897	0.0606	0.8966	0.3958	2	0.98733412244898	0.985032326530612	0.0720954285714286	0.92485012244898	0.374998775510204	2	0.0100464514953486	0.0123890461273489	0.0270997599415362	0.0467822755882719	0.0481111504828868
765	6 vs. 26	3	0.8167	0.7789	0.1805	0.7619	0.5625	3	0.755337551020408	0.757762775510204	0.185275510204082	0.653356163265306	0.506666612244898	3	0.215412445918853	0.212311770503312	0.0832591056930451	0.204524859292461	0.0496309945955463
766	6 vs. 27	1	0.8756	0.8848	0.1691	0.8485	0.3125	1	0.89884612244898	0.903832	0.13500693877551	0.853011102040816	0.389999673469388	1	0.102650607765256	0.100856964519843	0.0636681222951117	0.130103373143979	0.0423790449114384
767	6 vs. 27	2	0.9907	0.9873	0.066	0.9655	0.3958	2	0.98733412244898	0.985032326530612	0.0720954285714286	0.92485012244898	0.374998775510204	2	0.0100464514953486	0.0123890461273489	0.0270997599415362	0.0467822755882719	0.0481111504828868
768	6 vs. 27	3	0.2184	0.2154	0.3612	0.2857	0.5625	3	0.755337551020408	0.757762775510204	0.185275510204082	0.653356163265306	0.506666612244898	3	0.215412445918853	0.212311770503312	0.0832591056930451	0.204524859292461	0.0496309945955463
769	6 vs. 28	1	0.9431	0.9473	0.1152	0.8889	0.4375	1	0.89884612244898	0.903832	0.13500693877551	0.853011102040816	0.389999673469388	1	0.102650607765256	0.100856964519843	0.0636681222951117	0.130103373143979	0.0423790449114384
770	6 vs. 28	2	0.9913	0.9882	0.064	1	0.375	2	0.98733412244898	0.985032326530612	0.0720954285714286	0.92485012244898	0.374998775510204	2	0.0100464514953486	0.0123890461273489	0.0270997599415362	0.0467822755882719	0.0481111504828868
771	6 vs. 28	3	0.5205	0.476	0.2925	0.5714	0.5625	3	0.755337551020408	0.757762775510204	0.185275510204082	0.653356163265306	0.506666612244898	3	0.215412445918853	0.212311770503312	0.0832591056930451	0.204524859292461	0.0496309945955463
772	6 vs. 29	1	0.8862	0.8947	0.1608	0.8966	0.3958	1	0.89884612244898	0.903832	0.13500693877551	0.853011102040816	0.389999673469388	1	0.102650607765256	0.100856964519843	0.0636681222951117	0.130103373143979	0.0423790449114384
773	6 vs. 29	2	0.9749	0.9647	0.1073	0.9286	0.4167	2	0.98733412244898	0.985032326530612	0.0720954285714286	0.92485012244898	0.374998775510204	2	0.0100464514953486	0.0123890461273489	0.0270997599415362	0.0467822755882719	0.0481111504828868
774	6 vs. 29	3	0.7223	0.6862	0.2261	0.6364	0.5417	3	0.755337551020408	0.757762775510204	0.185275510204082	0.653356163265306	0.506666612244898	3	0.215412445918853	0.212311770503312	0.0832591056930451	0.204524859292461	0.0496309945955463
775	6 vs. 30	1	0.9681	0.9691	0.0871	0.8966	0.3958	1	0.89884612244898	0.903832	0.13500693877551	0.853011102040816	0.389999673469388	1	0.102650607765256	0.100856964519843	0.0636681222951117	0.130103373143979	0.0423790449114384
776	6 vs. 30	2	0.9865	0.9894	0.08	0.9375	0.3333	2	0.98733412244898	0.985032326530612	0.0720954285714286	0.92485012244898	0.374998775510204	2	0.0100464514953486	0.0123890461273489	0.0270997599415362	0.0467822755882719	0.0481111504828868
777	6 vs. 30	3	0.9036	0.9301	0.1317	0.6316	0.6042	3	0.755337551020408	0.757762775510204	0.185275510204082	0.653356163265306	0.506666612244898	3	0.215412445918853	0.212311770503312	0.0832591056930451	0.204524859292461	0.0496309945955463
778	6 vs. 31	1	0.954	0.9533	0.1031	0.9655	0.3958	1	0.89884612244898	0.903832	0.13500693877551	0.853011102040816	0.389999673469388	1	0.102650607765256	0.100856964519843	0.0636681222951117	0.130103373143979	0.0423790449114384
779	6 vs. 31	2	0.9888	0.9867	0.0717	0.8966	0.3958	2	0.98733412244898	0.985032326530612	0.0720954285714286	0.92485012244898	0.374998775510204	2	0.0100464514953486	0.0123890461273489	0.0270997599415362	0.0467822755882719	0.0481111504828868
780	6 vs. 31	3	0.9399	0.9258	0.1062	0.8696	0.5208	3	0.755337551020408	0.757762775510204	0.185275510204082	0.653356163265306	0.506666612244898	3	0.215412445918853	0.212311770503312	0.0832591056930451	0.204524859292461	0.0496309945955463
781	6 vs. 32	1	0.9842	0.9865	0.061	0.9655	0.3958	1	0.89884612244898	0.903832	0.13500693877551	0.853011102040816	0.389999673469388	1	0.102650607765256	0.100856964519843	0.0636681222951117	0.130103373143979	0.0423790449114384
782	6 vs. 32	2	0.9912	0.9921	0.0642	0.9677	0.3542	2	0.98733412244898	0.985032326530612	0.0720954285714286	0.92485012244898	0.374998775510204	2	0.0100464514953486	0.0123890461273489	0.0270997599415362	0.0467822755882719	0.0481111504828868
783	6 vs. 32	3	0.7054	0.6865	0.2269	0.5455	0.5417	3	0.755337551020408	0.757762775510204	0.185275510204082	0.653356163265306	0.506666612244898	3	0.215412445918853	0.212311770503312	0.0832591056930451	0.204524859292461	0.0496309945955463
784	6 vs. 33	1	0.6374	0.6569	0.2816	0.6154	0.4583	1	0.89884612244898	0.903832	0.13500693877551	0.853011102040816	0.389999673469388	1	0.102650607765256	0.100856964519843	0.0636681222951117	0.130103373143979	0.0423790449114384
785	6 vs. 33	2	0.979	0.9707	0.0983	0.9286	0.4167	2	0.98733412244898	0.985032326530612	0.0720954285714286	0.92485012244898	0.374998775510204	2	0.0100464514953486	0.0123890461273489	0.0270997599415362	0.0467822755882719	0.0481111504828868
786	6 vs. 33	3	0.544	0.5123	0.2787	0.4545	0.5417	3	0.755337551020408	0.757762775510204	0.185275510204082	0.653356163265306	0.506666612244898	3	0.215412445918853	0.212311770503312	0.0832591056930451	0.204524859292461	0.0496309945955463
787	6 vs. 34	1	0.9931	0.9931	0.0403	0.9655	0.3958	1	0.89884612244898	0.903832	0.13500693877551	0.853011102040816	0.389999673469388	1	0.102650607765256	0.100856964519843	0.0636681222951117	0.130103373143979	0.0423790449114384
788	6 vs. 34	2	0.9943	0.9935	0.0512	1	0.375	2	0.98733412244898	0.985032326530612	0.0720954285714286	0.92485012244898	0.374998775510204	2	0.0100464514953486	0.0123890461273489	0.0270997599415362	0.0467822755882719	0.0481111504828868
789	6 vs. 34	3	0.7256	0.6771	0.2209	0.5455	0.5417	3	0.755337551020408	0.757762775510204	0.185275510204082	0.653356163265306	0.506666612244898	3	0.215412445918853	0.212311770503312	0.0832591056930451	0.204524859292461	0.0496309945955463
790	6 vs. 35	1	0.9666	0.9698	0.0888	0.9032	0.3542	1	0.89884612244898	0.903832	0.13500693877551	0.853011102040816	0.389999673469388	1	0.102650607765256	0.100856964519843	0.0636681222951117	0.130103373143979	0.0423790449114384
791	6 vs. 35	2	0.9909	0.9897	0.0661	0.9677	0.3542	2	0.98733412244898	0.985032326530612	0.0720954285714286	0.92485012244898	0.374998775510204	2	0.0100464514953486	0.0123890461273489	0.0270997599415362	0.0467822755882719	0.0481111504828868
792	6 vs. 35	3	0.7678	0.7603	0.2043	0.7273	0.5417	3	0.755337551020408	0.757762775510204	0.185275510204082	0.653356163265306	0.506666612244898	3	0.215412445918853	0.212311770503312	0.0832591056930451	0.204524859292461	0.0496309945955463
793	6 vs. 36	1	0.9878	0.9878	0.0538	0.9677	0.3542	1	0.89884612244898	0.903832	0.13500693877551	0.853011102040816	0.389999673469388	1	0.102650607765256	0.100856964519843	0.0636681222951117	0.130103373143979	0.0423790449114384
794	6 vs. 36	2	0.9838	0.982	0.0872	0.9091	0.3125	2	0.98733412244898	0.985032326530612	0.0720954285714286	0.92485012244898	0.374998775510204	2	0.0100464514953486	0.0123890461273489	0.0270997599415362	0.0467822755882719	0.0481111504828868
795	6 vs. 36	3	0.9628	0.9555	0.083	0.9	0.5833	3	0.755337551020408	0.757762775510204	0.185275510204082	0.653356163265306	0.506666612244898	3	0.215412445918853	0.212311770503312	0.0832591056930451	0.204524859292461	0.0496309945955463
796	6 vs. 37	1	0.9005	0.9119	0.1513	0.9032	0.3542	1	0.89884612244898	0.903832	0.13500693877551	0.853011102040816	0.389999673469388	1	0.102650607765256	0.100856964519843	0.0636681222951117	0.130103373143979	0.0423790449114384
797	6 vs. 37	2	0.9902	0.9866	0.0674	0.9286	0.4167	2	0.98733412244898	0.985032326530612	0.0720954285714286	0.92485012244898	0.374998775510204	2	0.0100464514953486	0.0123890461273489	0.0270997599415362	0.0467822755882719	0.0481111504828868
798	6 vs. 37	3	0.607	0.5522	0.2629	0.5217	0.5208	3	0.755337551020408	0.757762775510204	0.185275510204082	0.653356163265306	0.506666612244898	3	0.215412445918853	0.212311770503312	0.0832591056930451	0.204524859292461	0.0496309945955463
799	6 vs. 38	1	0.966	0.9668	0.089	1	0.375	1	0.89884612244898	0.903832	0.13500693877551	0.853011102040816	0.389999673469388	1	0.102650607765256	0.100856964519843	0.0636681222951117	0.130103373143979	0.0423790449114384
800	6 vs. 38	2	0.9919	0.9921	0.0621	0.9375	0.3333	2	0.98733412244898	0.985032326530612	0.0720954285714286	0.92485012244898	0.374998775510204	2	0.0100464514953486	0.0123890461273489	0.0270997599415362	0.0467822755882719	0.0481111504828868
801	6 vs. 38	3	0.5978	0.6087	0.2621	0.6	0.5833	3	0.755337551020408	0.757762775510204	0.185275510204082	0.653356163265306	0.506666612244898	3	0.215412445918853	0.212311770503312	0.0832591056930451	0.204524859292461	0.0496309945955463
802	6 vs. 39	1	0.9612	0.9648	0.0949	1	0.375	1	0.89884612244898	0.903832	0.13500693877551	0.853011102040816	0.389999673469388	1	0.102650607765256	0.100856964519843	0.0636681222951117	0.130103373143979	0.0423790449114384
803	6 vs. 39	2	0.9911	0.9889	0.065	0.9677	0.3542	2	0.98733412244898	0.985032326530612	0.0720954285714286	0.92485012244898	0.374998775510204	2	0.0100464514953486	0.0123890461273489	0.0270997599415362	0.0467822755882719	0.0481111504828868
804	6 vs. 39	3	0.9472	0.9347	0.0991	0.8571	0.5625	3	0.755337551020408	0.757762775510204	0.185275510204082	0.653356163265306	0.506666612244898	3	0.215412445918853	0.212311770503312	0.0832591056930451	0.204524859292461	0.0496309945955463
805	6 vs. 40	1	0.9731	0.98	0.0809	0.9333	0.375	1	0.89884612244898	0.903832	0.13500693877551	0.853011102040816	0.389999673469388	1	0.102650607765256	0.100856964519843	0.0636681222951117	0.130103373143979	0.0423790449114384
806	6 vs. 40	2	0.9836	0.9855	0.0881	0.9091	0.3125	2	0.98733412244898	0.985032326530612	0.0720954285714286	0.92485012244898	0.374998775510204	2	0.0100464514953486	0.0123890461273489	0.0270997599415362	0.0467822755882719	0.0481111504828868
807	6 vs. 40	3	0.8996	0.8836	0.137	0.8571	0.5625	3	0.755337551020408	0.757762775510204	0.185275510204082	0.653356163265306	0.506666612244898	3	0.215412445918853	0.212311770503312	0.0832591056930451	0.204524859292461	0.0496309945955463
808	6 vs. 41	1	0.9933	0.9934	0.0399	1	0.375	1	0.89884612244898	0.903832	0.13500693877551	0.853011102040816	0.389999673469388	1	0.102650607765256	0.100856964519843	0.0636681222951117	0.130103373143979	0.0423790449114384
809	6 vs. 41	2	0.9933	0.9941	0.0562	1	0.375	2	0.98733412244898	0.985032326530612	0.0720954285714286	0.92485012244898	0.374998775510204	2	0.0100464514953486	0.0123890461273489	0.0270997599415362	0.0467822755882719	0.0481111504828868
810	6 vs. 41	3	0.8197	0.7956	0.182	0.6667	0.5	3	0.755337551020408	0.757762775510204	0.185275510204082	0.653356163265306	0.506666612244898	3	0.215412445918853	0.212311770503312	0.0832591056930451	0.204524859292461	0.0496309945955463
811	6 vs. 42	1	0.9197	0.9207	0.1356	0.9286	0.4167	1	0.89884612244898	0.903832	0.13500693877551	0.853011102040816	0.389999673469388	1	0.102650607765256	0.100856964519843	0.0636681222951117	0.130103373143979	0.0423790449114384
812	6 vs. 42	2	0.9845	0.9786	0.0845	0.8966	0.3958	2	0.98733412244898	0.985032326530612	0.0720954285714286	0.92485012244898	0.374998775510204	2	0.0100464514953486	0.0123890461273489	0.0270997599415362	0.0467822755882719	0.0481111504828868
813	6 vs. 42	3	0.852	0.8447	0.1615	0.8571	0.5625	3	0.755337551020408	0.757762775510204	0.185275510204082	0.653356163265306	0.506666612244898	3	0.215412445918853	0.212311770503312	0.0832591056930451	0.204524859292461	0.0496309945955463
814	6 vs. 43	1	0.9782	0.9819	0.0714	0.9655	0.3958	1	0.89884612244898	0.903832	0.13500693877551	0.853011102040816	0.389999673469388	1	0.102650607765256	0.100856964519843	0.0636681222951117	0.130103373143979	0.0423790449114384
815	6 vs. 43	2	0.9936	0.9928	0.056	0.9677	0.3542	2	0.98733412244898	0.985032326530612	0.0720954285714286	0.92485012244898	0.374998775510204	2	0.0100464514953486	0.0123890461273489	0.0270997599415362	0.0467822755882719	0.0481111504828868
816	6 vs. 43	3	0.8917	0.8687	0.1408	0.7826	0.5208	3	0.755337551020408	0.757762775510204	0.185275510204082	0.653356163265306	0.506666612244898	3	0.215412445918853	0.212311770503312	0.0832591056930451	0.204524859292461	0.0496309945955463
817	6 vs. 44	1	0.6456	0.6511	0.2733	0.6923	0.4583	1	0.89884612244898	0.903832	0.13500693877551	0.853011102040816	0.389999673469388	1	0.102650607765256	0.100856964519843	0.0636681222951117	0.130103373143979	0.0423790449114384
818	6 vs. 44	2	0.9874	0.9825	0.0768	0.9286	0.4167	2	0.98733412244898	0.985032326530612	0.0720954285714286	0.92485012244898	0.374998775510204	2	0.0100464514953486	0.0123890461273489	0.0270997599415362	0.0467822755882719	0.0481111504828868
819	6 vs. 44	3	0.8197	0.7932	0.1801	0.6667	0.5	3	0.755337551020408	0.757762775510204	0.185275510204082	0.653356163265306	0.506666612244898	3	0.215412445918853	0.212311770503312	0.0832591056930451	0.204524859292461	0.0496309945955463
820	6 vs. 45	1	0.984	0.9841	0.0621	0.9333	0.375	1	0.89884612244898	0.903832	0.13500693877551	0.853011102040816	0.389999673469388	1	0.102650607765256	0.100856964519843	0.0636681222951117	0.130103373143979	0.0423790449114384
821	6 vs. 45	2	0.9897	0.989	0.0697	0.9375	0.3333	2	0.98733412244898	0.985032326530612	0.0720954285714286	0.92485012244898	0.374998775510204	2	0.0100464514953486	0.0123890461273489	0.0270997599415362	0.0467822755882719	0.0481111504828868
822	6 vs. 45	3	0.9377	0.9269	0.1101	0.8	0.5833	3	0.755337551020408	0.757762775510204	0.185275510204082	0.653356163265306	0.506666612244898	3	0.215412445918853	0.212311770503312	0.0832591056930451	0.204524859292461	0.0496309945955463
823	6 vs. 46	1	0.7485	0.7475	0.2333	0.8667	0.375	1	0.89884612244898	0.903832	0.13500693877551	0.853011102040816	0.389999673469388	1	0.102650607765256	0.100856964519843	0.0636681222951117	0.130103373143979	0.0423790449114384
824	6 vs. 46	2	0.9694	0.9583	0.118	0.8667	0.375	2	0.98733412244898	0.985032326530612	0.0720954285714286	0.92485012244898	0.374998775510204	2	0.0100464514953486	0.0123890461273489	0.0270997599415362	0.0467822755882719	0.0481111504828868
825	6 vs. 46	3	0.1461	0.2149	0.3771	0.1053	0.6042	3	0.755337551020408	0.757762775510204	0.185275510204082	0.653356163265306	0.506666612244898	3	0.215412445918853	0.212311770503312	0.0832591056930451	0.204524859292461	0.0496309945955463
826	6 vs. 47	1	0.976	0.9798	0.0752	0.9375	0.3333	1	0.89884612244898	0.903832	0.13500693877551	0.853011102040816	0.389999673469388	1	0.102650607765256	0.100856964519843	0.0636681222951117	0.130103373143979	0.0423790449114384
827	6 vs. 47	2	0.9946	0.9939	0.0508	0.9677	0.3542	2	0.98733412244898	0.985032326530612	0.0720954285714286	0.92485012244898	0.374998775510204	2	0.0100464514953486	0.0123890461273489	0.0270997599415362	0.0467822755882719	0.0481111504828868
828	6 vs. 47	3	0.9257	0.9071	0.1171	0.9091	0.5417	3	0.755337551020408	0.757762775510204	0.185275510204082	0.653356163265306	0.506666612244898	3	0.215412445918853	0.212311770503312	0.0832591056930451	0.204524859292461	0.0496309945955463
829	6 vs. 48	1	0.9054	0.9057	0.1462	0.8387	0.3542	1	0.89884612244898	0.903832	0.13500693877551	0.853011102040816	0.389999673469388	1	0.102650607765256	0.100856964519843	0.0636681222951117	0.130103373143979	0.0423790449114384
830	6 vs. 48	2	0.983	0.9772	0.0883	0.9286	0.4167	2	0.98733412244898	0.985032326530612	0.0720954285714286	0.92485012244898	0.374998775510204	2	0.0100464514953486	0.0123890461273489	0.0270997599415362	0.0467822755882719	0.0481111504828868
831	6 vs. 48	3	0.7168	0.7962	0.2196	0.5882	0.6458	3	0.755337551020408	0.757762775510204	0.185275510204082	0.653356163265306	0.506666612244898	3	0.215412445918853	0.212311770503312	0.0832591056930451	0.204524859292461	0.0496309945955463
832	6 vs. 49	1	0.9872	0.9869	0.0568	1	0.375	1	0.89884612244898	0.903832	0.13500693877551	0.853011102040816	0.389999673469388	1	0.102650607765256	0.100856964519843	0.0636681222951117	0.130103373143979	0.0423790449114384
833	6 vs. 49	2	0.989	0.9869	0.0723	0.9677	0.3542	2	0.98733412244898	0.985032326530612	0.0720954285714286	0.92485012244898	0.374998775510204	2	0.0100464514953486	0.0123890461273489	0.0270997599415362	0.0467822755882719	0.0481111504828868
834	6 vs. 49	3	0.9255	0.9053	0.119	0.8571	0.5625	3	0.755337551020408	0.757762775510204	0.185275510204082	0.653356163265306	0.506666612244898	3	0.215412445918853	0.212311770503312	0.0832591056930451	0.204524859292461	0.0496309945955463
835	6 vs. 50	1	0.7833	0.8062	0.2215	0.8	0.375	1	0.89884612244898	0.903832	0.13500693877551	0.853011102040816	0.389999673469388	1	0.102650607765256	0.100856964519843	0.0636681222951117	0.130103373143979	0.0423790449114384
836	6 vs. 50	2	0.9796	0.9713	0.0969	0.9286	0.4167	2	0.98733412244898	0.985032326530612	0.0720954285714286	0.92485012244898	0.374998775510204	2	0.0100464514953486	0.0123890461273489	0.0270997599415362	0.0467822755882719	0.0481111504828868
837	6 vs. 50	3	0.6714	0.6563	0.2418	0.56	0.4792	3	0.755337551020408	0.757762775510204	0.185275510204082	0.653356163265306	0.506666612244898	3	0.215412445918853	0.212311770503312	0.0832591056930451	0.204524859292461	0.0496309945955463
838	7 vs. 8	1	0.9409	0.9429	0.1083	0.8889	0.4375	1	0.89884612244898	0.903832	0.13500693877551	0.853011102040816	0.389999673469388	1	0.102650607765256	0.100856964519843	0.0636681222951117	0.130103373143979	0.0423790449114384
839	7 vs. 8	2	0.991	0.989	0.0644	0.963	0.4375	2	0.98733412244898	0.985032326530612	0.0720954285714286	0.92485012244898	0.374998775510204	2	0.0100464514953486	0.0123890461273489	0.0270997599415362	0.0467822755882719	0.0481111504828868
840	7 vs. 8	3	0.8983	0.893	0.1323	0.8	0.4792	3	0.755337551020408	0.757762775510204	0.185275510204082	0.653356163265306	0.506666612244898	3	0.215412445918853	0.212311770503312	0.0832591056930451	0.204524859292461	0.0496309945955463
841	7 vs. 9	1	0.9468	0.9467	0.1041	0.8889	0.4375	1	0.89884612244898	0.903832	0.13500693877551	0.853011102040816	0.389999673469388	1	0.102650607765256	0.100856964519843	0.0636681222951117	0.130103373143979	0.0423790449114384
842	7 vs. 9	2	0.9917	0.9883	0.0618	1	0.4583	2	0.98733412244898	0.985032326530612	0.0720954285714286	0.92485012244898	0.374998775510204	2	0.0100464514953486	0.0123890461273489	0.0270997599415362	0.0467822755882719	0.0481111504828868
843	7 vs. 9	3	0.7164	0.7261	0.2164	0.6154	0.4583	3	0.755337551020408	0.757762775510204	0.185275510204082	0.653356163265306	0.506666612244898	3	0.215412445918853	0.212311770503312	0.0832591056930451	0.204524859292461	0.0496309945955463
844	7 vs. 10	1	0.9506	0.9523	0.1004	0.8571	0.4167	1	0.89884612244898	0.903832	0.13500693877551	0.853011102040816	0.389999673469388	1	0.102650607765256	0.100856964519843	0.0636681222951117	0.130103373143979	0.0423790449114384
845	7 vs. 10	2	0.996	0.9943	0.043	1	0.4583	2	0.98733412244898	0.985032326530612	0.0720954285714286	0.92485012244898	0.374998775510204	2	0.0100464514953486	0.0123890461273489	0.0270997599415362	0.0467822755882719	0.0481111504828868
846	7 vs. 10	3	0.9141	0.9068	0.1199	0.7692	0.4583	3	0.755337551020408	0.757762775510204	0.185275510204082	0.653356163265306	0.506666612244898	3	0.215412445918853	0.212311770503312	0.0832591056930451	0.204524859292461	0.0496309945955463
847	7 vs. 11	1	0.981	0.9818	0.0674	0.8966	0.3958	1	0.89884612244898	0.903832	0.13500693877551	0.853011102040816	0.389999673469388	1	0.102650607765256	0.100856964519843	0.0636681222951117	0.130103373143979	0.0423790449114384
848	7 vs. 11	2	0.9971	0.9967	0.0363	0.963	0.4375	2	0.98733412244898	0.985032326530612	0.0720954285714286	0.92485012244898	0.374998775510204	2	0.0100464514953486	0.0123890461273489	0.0270997599415362	0.0467822755882719	0.0481111504828868
849	7 vs. 11	3	0.967	0.9694	0.0775	0.8889	0.4375	3	0.755337551020408	0.757762775510204	0.185275510204082	0.653356163265306	0.506666612244898	3	0.215412445918853	0.212311770503312	0.0832591056930451	0.204524859292461	0.0496309945955463
850	7 vs. 12	1	0.8857	0.8949	0.1632	0.7857	0.4167	1	0.89884612244898	0.903832	0.13500693877551	0.853011102040816	0.389999673469388	1	0.102650607765256	0.100856964519843	0.0636681222951117	0.130103373143979	0.0423790449114384
851	7 vs. 12	2	0.989	0.9904	0.0719	0.8667	0.375	2	0.98733412244898	0.985032326530612	0.0720954285714286	0.92485012244898	0.374998775510204	2	0.0100464514953486	0.0123890461273489	0.0270997599415362	0.0467822755882719	0.0481111504828868
852	7 vs. 12	3	0.9842	0.9833	0.0543	0.8462	0.4583	3	0.755337551020408	0.757762775510204	0.185275510204082	0.653356163265306	0.506666612244898	3	0.215412445918853	0.212311770503312	0.0832591056930451	0.204524859292461	0.0496309945955463
853	7 vs. 13	1	0.8084	0.809	0.1948	0.8	0.375	1	0.89884612244898	0.903832	0.13500693877551	0.853011102040816	0.389999673469388	1	0.102650607765256	0.100856964519843	0.0636681222951117	0.130103373143979	0.0423790449114384
854	7 vs. 13	2	0.983	0.98	0.0892	0.9231	0.4583	2	0.98733412244898	0.985032326530612	0.0720954285714286	0.92485012244898	0.374998775510204	2	0.0100464514953486	0.0123890461273489	0.0270997599415362	0.0467822755882719	0.0481111504828868
855	7 vs. 13	3	0.7736	0.753	0.202	0.72	0.4792	3	0.755337551020408	0.757762775510204	0.185275510204082	0.653356163265306	0.506666612244898	3	0.215412445918853	0.212311770503312	0.0832591056930451	0.204524859292461	0.0496309945955463
856	7 vs. 14	1	0.9311	0.9348	0.1236	0.8571	0.4167	1	0.89884612244898	0.903832	0.13500693877551	0.853011102040816	0.389999673469388	1	0.102650607765256	0.100856964519843	0.0636681222951117	0.130103373143979	0.0423790449114384
857	7 vs. 14	2	0.9954	0.9942	0.0466	0.9286	0.4167	2	0.98733412244898	0.985032326530612	0.0720954285714286	0.92485012244898	0.374998775510204	2	0.0100464514953486	0.0123890461273489	0.0270997599415362	0.0467822755882719	0.0481111504828868
858	7 vs. 14	3	0.9075	0.9065	0.1249	0.64	0.4792	3	0.755337551020408	0.757762775510204	0.185275510204082	0.653356163265306	0.506666612244898	3	0.215412445918853	0.212311770503312	0.0832591056930451	0.204524859292461	0.0496309945955463
859	7 vs. 15	1	0.9606	0.9642	0.0924	0.8667	0.375	1	0.89884612244898	0.903832	0.13500693877551	0.853011102040816	0.389999673469388	1	0.102650607765256	0.100856964519843	0.0636681222951117	0.130103373143979	0.0423790449114384
860	7 vs. 15	2	0.9948	0.9935	0.0488	0.9286	0.4167	2	0.98733412244898	0.985032326530612	0.0720954285714286	0.92485012244898	0.374998775510204	2	0.0100464514953486	0.0123890461273489	0.0270997599415362	0.0467822755882719	0.0481111504828868
861	7 vs. 15	3	0.8959	0.8894	0.1332	0.7692	0.4583	3	0.755337551020408	0.757762775510204	0.185275510204082	0.653356163265306	0.506666612244898	3	0.215412445918853	0.212311770503312	0.0832591056930451	0.204524859292461	0.0496309945955463
862	7 vs. 16	1	0.9757	0.9806	0.073	0.8148	0.4375	1	0.89884612244898	0.903832	0.13500693877551	0.853011102040816	0.389999673469388	1	0.102650607765256	0.100856964519843	0.0636681222951117	0.130103373143979	0.0423790449114384
863	7 vs. 16	2	0.9949	0.9944	0.0485	0.963	0.4375	2	0.98733412244898	0.985032326530612	0.0720954285714286	0.92485012244898	0.374998775510204	2	0.0100464514953486	0.0123890461273489	0.0270997599415362	0.0467822755882719	0.0481111504828868
864	7 vs. 16	3	0.5478	0.5861	0.2727	0.3704	0.4375	3	0.755337551020408	0.757762775510204	0.185275510204082	0.653356163265306	0.506666612244898	3	0.215412445918853	0.212311770503312	0.0832591056930451	0.204524859292461	0.0496309945955463
865	7 vs. 17	1	0.9186	0.9206	0.1341	0.8966	0.3958	1	0.89884612244898	0.903832	0.13500693877551	0.853011102040816	0.389999673469388	1	0.102650607765256	0.100856964519843	0.0636681222951117	0.130103373143979	0.0423790449114384
866	7 vs. 17	2	0.9941	0.9922	0.0524	0.9286	0.4167	2	0.98733412244898	0.985032326530612	0.0720954285714286	0.92485012244898	0.374998775510204	2	0.0100464514953486	0.0123890461273489	0.0270997599415362	0.0467822755882719	0.0481111504828868
867	7 vs. 17	3	0.8545	0.8415	0.166	0.8333	0.5	3	0.755337551020408	0.757762775510204	0.185275510204082	0.653356163265306	0.506666612244898	3	0.215412445918853	0.212311770503312	0.0832591056930451	0.204524859292461	0.0496309945955463
868	7 vs. 18	1	0.964	0.9649	0.0909	0.9333	0.375	1	0.89884612244898	0.903832	0.13500693877551	0.853011102040816	0.389999673469388	1	0.102650607765256	0.100856964519843	0.0636681222951117	0.130103373143979	0.0423790449114384
869	7 vs. 18	2	0.9971	0.9961	0.0365	0.9286	0.4167	2	0.98733412244898	0.985032326530612	0.0720954285714286	0.92485012244898	0.374998775510204	2	0.0100464514953486	0.0123890461273489	0.0270997599415362	0.0467822755882719	0.0481111504828868
870	7 vs. 18	3	0.9582	0.9624	0.0841	0.9231	0.4583	3	0.755337551020408	0.757762775510204	0.185275510204082	0.653356163265306	0.506666612244898	3	0.215412445918853	0.212311770503312	0.0832591056930451	0.204524859292461	0.0496309945955463
871	7 vs. 19	1	0.9475	0.9481	0.1057	0.9333	0.375	1	0.89884612244898	0.903832	0.13500693877551	0.853011102040816	0.389999673469388	1	0.102650607765256	0.100856964519843	0.0636681222951117	0.130103373143979	0.0423790449114384
872	7 vs. 19	2	0.9927	0.9905	0.0582	0.9286	0.4167	2	0.98733412244898	0.985032326530612	0.0720954285714286	0.92485012244898	0.374998775510204	2	0.0100464514953486	0.0123890461273489	0.0270997599415362	0.0467822755882719	0.0481111504828868
873	7 vs. 19	3	0.9445	0.9404	0.0963	0.8148	0.4375	3	0.755337551020408	0.757762775510204	0.185275510204082	0.653356163265306	0.506666612244898	3	0.215412445918853	0.212311770503312	0.0832591056930451	0.204524859292461	0.0496309945955463
874	7 vs. 20	1	0.946	0.9464	0.1061	0.8462	0.4583	1	0.89884612244898	0.903832	0.13500693877551	0.853011102040816	0.389999673469388	1	0.102650607765256	0.100856964519843	0.0636681222951117	0.130103373143979	0.0423790449114384
875	7 vs. 20	2	0.9963	0.9951	0.0411	1	0.4583	2	0.98733412244898	0.985032326530612	0.0720954285714286	0.92485012244898	0.374998775510204	2	0.0100464514953486	0.0123890461273489	0.0270997599415362	0.0467822755882719	0.0481111504828868
876	7 vs. 20	3	0.9528	0.9486	0.09	0.8696	0.5208	3	0.755337551020408	0.757762775510204	0.185275510204082	0.653356163265306	0.506666612244898	3	0.215412445918853	0.212311770503312	0.0832591056930451	0.204524859292461	0.0496309945955463
877	7 vs. 21	1	0.9155	0.9315	0.1365	0.8966	0.3958	1	0.89884612244898	0.903832	0.13500693877551	0.853011102040816	0.389999673469388	1	0.102650607765256	0.100856964519843	0.0636681222951117	0.130103373143979	0.0423790449114384
878	7 vs. 21	2	0.9693	0.9713	0.1206	0.8125	0.3333	2	0.98733412244898	0.985032326530612	0.0720954285714286	0.92485012244898	0.374998775510204	2	0.0100464514953486	0.0123890461273489	0.0270997599415362	0.0467822755882719	0.0481111504828868
879	7 vs. 21	3	0.5628	0.5894	0.2583	0.48	0.4792	3	0.755337551020408	0.757762775510204	0.185275510204082	0.653356163265306	0.506666612244898	3	0.215412445918853	0.212311770503312	0.0832591056930451	0.204524859292461	0.0496309945955463
880	7 vs. 22	1	0.9339	0.9338	0.1204	0.9286	0.4167	1	0.89884612244898	0.903832	0.13500693877551	0.853011102040816	0.389999673469388	1	0.102650607765256	0.100856964519843	0.0636681222951117	0.130103373143979	0.0423790449114384
881	7 vs. 22	2	0.9979	0.9972	0.0308	0.8966	0.3958	2	0.98733412244898	0.985032326530612	0.0720954285714286	0.92485012244898	0.374998775510204	2	0.0100464514953486	0.0123890461273489	0.0270997599415362	0.0467822755882719	0.0481111504828868
882	7 vs. 22	3	0.9511	0.9499	0.0906	0.9167	0.5	3	0.755337551020408	0.757762775510204	0.185275510204082	0.653356163265306	0.506666612244898	3	0.215412445918853	0.212311770503312	0.0832591056930451	0.204524859292461	0.0496309945955463
883	7 vs. 23	1	0.9654	0.9661	0.0857	0.9032	0.3542	1	0.89884612244898	0.903832	0.13500693877551	0.853011102040816	0.389999673469388	1	0.102650607765256	0.100856964519843	0.0636681222951117	0.130103373143979	0.0423790449114384
884	7 vs. 23	2	0.997	0.9958	0.0372	1	0.4583	2	0.98733412244898	0.985032326530612	0.0720954285714286	0.92485012244898	0.374998775510204	2	0.0100464514953486	0.0123890461273489	0.0270997599415362	0.0467822755882719	0.0481111504828868
885	7 vs. 23	3	0.9653	0.9654	0.0773	0.88	0.4792	3	0.755337551020408	0.757762775510204	0.185275510204082	0.653356163265306	0.506666612244898	3	0.215412445918853	0.212311770503312	0.0832591056930451	0.204524859292461	0.0496309945955463
886	7 vs. 24	1	0.938	0.9403	0.1229	0.8966	0.3958	1	0.89884612244898	0.903832	0.13500693877551	0.853011102040816	0.389999673469388	1	0.102650607765256	0.100856964519843	0.0636681222951117	0.130103373143979	0.0423790449114384
887	7 vs. 24	2	0.9951	0.9936	0.0475	0.8966	0.3958	2	0.98733412244898	0.985032326530612	0.0720954285714286	0.92485012244898	0.374998775510204	2	0.0100464514953486	0.0123890461273489	0.0270997599415362	0.0467822755882719	0.0481111504828868
888	7 vs. 24	3	0.8505	0.8382	0.1657	0.8333	0.5	3	0.755337551020408	0.757762775510204	0.185275510204082	0.653356163265306	0.506666612244898	3	0.215412445918853	0.212311770503312	0.0832591056930451	0.204524859292461	0.0496309945955463
889	7 vs. 25	1	0.9188	0.9189	0.135	0.8966	0.3958	1	0.89884612244898	0.903832	0.13500693877551	0.853011102040816	0.389999673469388	1	0.102650607765256	0.100856964519843	0.0636681222951117	0.130103373143979	0.0423790449114384
890	7 vs. 25	2	0.9842	0.9836	0.0862	0.8966	0.3958	2	0.98733412244898	0.985032326530612	0.0720954285714286	0.92485012244898	0.374998775510204	2	0.0100464514953486	0.0123890461273489	0.0270997599415362	0.0467822755882719	0.0481111504828868
891	7 vs. 25	3	0.8587	0.8811	0.1506	0.6957	0.5208	3	0.755337551020408	0.757762775510204	0.185275510204082	0.653356163265306	0.506666612244898	3	0.215412445918853	0.212311770503312	0.0832591056930451	0.204524859292461	0.0496309945955463
892	7 vs. 26	1	0.9717	0.9744	0.0831	0.8667	0.375	1	0.89884612244898	0.903832	0.13500693877551	0.853011102040816	0.389999673469388	1	0.102650607765256	0.100856964519843	0.0636681222951117	0.130103373143979	0.0423790449114384
893	7 vs. 26	2	0.9976	0.9976	0.0331	0.963	0.4375	2	0.98733412244898	0.985032326530612	0.0720954285714286	0.92485012244898	0.374998775510204	2	0.0100464514953486	0.0123890461273489	0.0270997599415362	0.0467822755882719	0.0481111504828868
894	7 vs. 26	3	0.9625	0.9638	0.0794	0.8333	0.5	3	0.755337551020408	0.757762775510204	0.185275510204082	0.653356163265306	0.506666612244898	3	0.215412445918853	0.212311770503312	0.0832591056930451	0.204524859292461	0.0496309945955463
895	7 vs. 27	1	0.9263	0.9269	0.1258	0.875	0.3333	1	0.89884612244898	0.903832	0.13500693877551	0.853011102040816	0.389999673469388	1	0.102650607765256	0.100856964519843	0.0636681222951117	0.130103373143979	0.0423790449114384
896	7 vs. 27	2	0.9891	0.9851	0.0714	0.963	0.4375	2	0.98733412244898	0.985032326530612	0.0720954285714286	0.92485012244898	0.374998775510204	2	0.0100464514953486	0.0123890461273489	0.0270997599415362	0.0467822755882719	0.0481111504828868
897	7 vs. 27	3	0.7406	0.7577	0.2033	0.5833	0.5	3	0.755337551020408	0.757762775510204	0.185275510204082	0.653356163265306	0.506666612244898	3	0.215412445918853	0.212311770503312	0.0832591056930451	0.204524859292461	0.0496309945955463
898	7 vs. 28	1	0.9863	0.9863	0.0575	0.9231	0.4583	1	0.89884612244898	0.903832	0.13500693877551	0.853011102040816	0.389999673469388	1	0.102650607765256	0.100856964519843	0.0636681222951117	0.130103373143979	0.0423790449114384
899	7 vs. 28	2	0.9943	0.9925	0.0519	0.9286	0.4167	2	0.98733412244898	0.985032326530612	0.0720954285714286	0.92485012244898	0.374998775510204	2	0.0100464514953486	0.0123890461273489	0.0270997599415362	0.0467822755882719	0.0481111504828868
900	7 vs. 28	3	0.8471	0.8369	0.1609	0.75	0.5	3	0.755337551020408	0.757762775510204	0.185275510204082	0.653356163265306	0.506666612244898	3	0.215412445918853	0.212311770503312	0.0832591056930451	0.204524859292461	0.0496309945955463
901	7 vs. 29	1	0.9872	0.9877	0.0521	1	0.4167	1	0.89884612244898	0.903832	0.13500693877551	0.853011102040816	0.389999673469388	1	0.102650607765256	0.100856964519843	0.0636681222951117	0.130103373143979	0.0423790449114384
902	7 vs. 29	2	0.9935	0.9912	0.0548	1	0.4583	2	0.98733412244898	0.985032326530612	0.0720954285714286	0.92485012244898	0.374998775510204	2	0.0100464514953486	0.0123890461273489	0.0270997599415362	0.0467822755882719	0.0481111504828868
903	7 vs. 29	3	0.9729	0.9704	0.0691	0.72	0.4792	3	0.755337551020408	0.757762775510204	0.185275510204082	0.653356163265306	0.506666612244898	3	0.215412445918853	0.212311770503312	0.0832591056930451	0.204524859292461	0.0496309945955463
904	7 vs. 30	1	0.9016	0.9144	0.1498	0.7857	0.4167	1	0.89884612244898	0.903832	0.13500693877551	0.853011102040816	0.389999673469388	1	0.102650607765256	0.100856964519843	0.0636681222951117	0.130103373143979	0.0423790449114384
905	7 vs. 30	2	0.9875	0.9913	0.0769	0.8667	0.375	2	0.98733412244898	0.985032326530612	0.0720954285714286	0.92485012244898	0.374998775510204	2	0.0100464514953486	0.0123890461273489	0.0270997599415362	0.0467822755882719	0.0481111504828868
906	7 vs. 30	3	0.6964	0.6798	0.2213	0.6364	0.5417	3	0.755337551020408	0.757762775510204	0.185275510204082	0.653356163265306	0.506666612244898	3	0.215412445918853	0.212311770503312	0.0832591056930451	0.204524859292461	0.0496309945955463
907	7 vs. 31	1	0.9722	0.9759	0.0769	0.9286	0.4167	1	0.89884612244898	0.903832	0.13500693877551	0.853011102040816	0.389999673469388	1	0.102650607765256	0.100856964519843	0.0636681222951117	0.130103373143979	0.0423790449114384
908	7 vs. 31	2	0.9969	0.998	0.0377	0.963	0.4375	2	0.98733412244898	0.985032326530612	0.0720954285714286	0.92485012244898	0.374998775510204	2	0.0100464514953486	0.0123890461273489	0.0270997599415362	0.0467822755882719	0.0481111504828868
909	7 vs. 31	3	0.9115	0.9098	0.1264	0.7692	0.4583	3	0.755337551020408	0.757762775510204	0.185275510204082	0.653356163265306	0.506666612244898	3	0.215412445918853	0.212311770503312	0.0832591056930451	0.204524859292461	0.0496309945955463
910	7 vs. 32	1	0.855	0.8683	0.1775	0.8571	0.4167	1	0.89884612244898	0.903832	0.13500693877551	0.853011102040816	0.389999673469388	1	0.102650607765256	0.100856964519843	0.0636681222951117	0.130103373143979	0.0423790449114384
911	7 vs. 32	2	0.989	0.9896	0.0717	0.8966	0.3958	2	0.98733412244898	0.985032326530612	0.0720954285714286	0.92485012244898	0.374998775510204	2	0.0100464514953486	0.0123890461273489	0.0270997599415362	0.0467822755882719	0.0481111504828868
912	7 vs. 32	3	0.9563	0.9538	0.0856	0.72	0.4792	3	0.755337551020408	0.757762775510204	0.185275510204082	0.653356163265306	0.506666612244898	3	0.215412445918853	0.212311770503312	0.0832591056930451	0.204524859292461	0.0496309945955463
913	7 vs. 33	1	0.8794	0.8853	0.1557	0.72	0.4792	1	0.89884612244898	0.903832	0.13500693877551	0.853011102040816	0.389999673469388	1	0.102650607765256	0.100856964519843	0.0636681222951117	0.130103373143979	0.0423790449114384
914	7 vs. 33	2	0.9912	0.988	0.0635	1	0.4583	2	0.98733412244898	0.985032326530612	0.0720954285714286	0.92485012244898	0.374998775510204	2	0.0100464514953486	0.0123890461273489	0.0270997599415362	0.0467822755882719	0.0481111504828868
915	7 vs. 33	3	0.8929	0.8885	0.1323	0.64	0.4792	3	0.755337551020408	0.757762775510204	0.185275510204082	0.653356163265306	0.506666612244898	3	0.215412445918853	0.212311770503312	0.0832591056930451	0.204524859292461	0.0496309945955463
916	7 vs. 34	1	0.9163	0.9233	0.1374	0.9286	0.4167	1	0.89884612244898	0.903832	0.13500693877551	0.853011102040816	0.389999673469388	1	0.102650607765256	0.100856964519843	0.0636681222951117	0.130103373143979	0.0423790449114384
917	7 vs. 34	2	0.9964	0.9965	0.041	0.9286	0.4167	2	0.98733412244898	0.985032326530612	0.0720954285714286	0.92485012244898	0.374998775510204	2	0.0100464514953486	0.0123890461273489	0.0270997599415362	0.0467822755882719	0.0481111504828868
918	7 vs. 34	3	0.9169	0.9095	0.1183	0.64	0.4792	3	0.755337551020408	0.757762775510204	0.185275510204082	0.653356163265306	0.506666612244898	3	0.215412445918853	0.212311770503312	0.0832591056930451	0.204524859292461	0.0496309945955463
919	7 vs. 35	1	0.8907	0.8907	0.1567	0.8667	0.375	1	0.89884612244898	0.903832	0.13500693877551	0.853011102040816	0.389999673469388	1	0.102650607765256	0.100856964519843	0.0636681222951117	0.130103373143979	0.0423790449114384
920	7 vs. 35	2	0.9875	0.9854	0.0773	0.8966	0.3958	2	0.98733412244898	0.985032326530612	0.0720954285714286	0.92485012244898	0.374998775510204	2	0.0100464514953486	0.0123890461273489	0.0270997599415362	0.0467822755882719	0.0481111504828868
921	7 vs. 35	3	0.9874	0.9877	0.0464	0.88	0.4792	3	0.755337551020408	0.757762775510204	0.185275510204082	0.653356163265306	0.506666612244898	3	0.215412445918853	0.212311770503312	0.0832591056930451	0.204524859292461	0.0496309945955463
922	7 vs. 36	1	0.9102	0.9181	0.143	0.8667	0.375	1	0.89884612244898	0.903832	0.13500693877551	0.853011102040816	0.389999673469388	1	0.102650607765256	0.100856964519843	0.0636681222951117	0.130103373143979	0.0423790449114384
923	7 vs. 36	2	0.9882	0.9883	0.0745	0.8387	0.3542	2	0.98733412244898	0.985032326530612	0.0720954285714286	0.92485012244898	0.374998775510204	2	0.0100464514953486	0.0123890461273489	0.0270997599415362	0.0467822755882719	0.0481111504828868
924	7 vs. 36	3	0.8741	0.865	0.148	0.8696	0.5208	3	0.755337551020408	0.757762775510204	0.185275510204082	0.653356163265306	0.506666612244898	3	0.215412445918853	0.212311770503312	0.0832591056930451	0.204524859292461	0.0496309945955463
925	7 vs. 37	1	0.9823	0.9835	0.0627	0.9333	0.375	1	0.89884612244898	0.903832	0.13500693877551	0.853011102040816	0.389999673469388	1	0.102650607765256	0.100856964519843	0.0636681222951117	0.130103373143979	0.0423790449114384
926	7 vs. 37	2	0.9976	0.9971	0.0331	1	0.4583	2	0.98733412244898	0.985032326530612	0.0720954285714286	0.92485012244898	0.374998775510204	2	0.0100464514953486	0.0123890461273489	0.0270997599415362	0.0467822755882719	0.0481111504828868
927	7 vs. 37	3	0.9393	0.9334	0.1008	0.7692	0.4583	3	0.755337551020408	0.757762775510204	0.185275510204082	0.653356163265306	0.506666612244898	3	0.215412445918853	0.212311770503312	0.0832591056930451	0.204524859292461	0.0496309945955463
928	7 vs. 38	1	0.967	0.9684	0.0859	0.8966	0.3958	1	0.89884612244898	0.903832	0.13500693877551	0.853011102040816	0.389999673469388	1	0.102650607765256	0.100856964519843	0.0636681222951117	0.130103373143979	0.0423790449114384
929	7 vs. 38	2	0.9938	0.995	0.0546	0.8667	0.375	2	0.98733412244898	0.985032326530612	0.0720954285714286	0.92485012244898	0.374998775510204	2	0.0100464514953486	0.0123890461273489	0.0270997599415362	0.0467822755882719	0.0481111504828868
930	7 vs. 38	3	0.9163	0.9256	0.1173	0.6957	0.5208	3	0.755337551020408	0.757762775510204	0.185275510204082	0.653356163265306	0.506666612244898	3	0.215412445918853	0.212311770503312	0.0832591056930451	0.204524859292461	0.0496309945955463
931	7 vs. 39	1	0.9533	0.9533	0.1004	0.8966	0.3958	1	0.89884612244898	0.903832	0.13500693877551	0.853011102040816	0.389999673469388	1	0.102650607765256	0.100856964519843	0.0636681222951117	0.130103373143979	0.0423790449114384
932	7 vs. 39	2	0.9952	0.9948	0.0479	0.8966	0.3958	2	0.98733412244898	0.985032326530612	0.0720954285714286	0.92485012244898	0.374998775510204	2	0.0100464514953486	0.0123890461273489	0.0270997599415362	0.0467822755882719	0.0481111504828868
933	7 vs. 39	3	0.6149	0.5664	0.2611	0.75	0.5	3	0.755337551020408	0.757762775510204	0.185275510204082	0.653356163265306	0.506666612244898	3	0.215412445918853	0.212311770503312	0.0832591056930451	0.204524859292461	0.0496309945955463
934	7 vs. 40	1	0.8286	0.8503	0.1984	0.8276	0.3958	1	0.89884612244898	0.903832	0.13500693877551	0.853011102040816	0.389999673469388	1	0.102650607765256	0.100856964519843	0.0636681222951117	0.130103373143979	0.0423790449114384
935	7 vs. 40	2	0.9786	0.9794	0.1007	0.8387	0.3542	2	0.98733412244898	0.985032326530612	0.0720954285714286	0.92485012244898	0.374998775510204	2	0.0100464514953486	0.0123890461273489	0.0270997599415362	0.0467822755882719	0.0481111504828868
936	7 vs. 40	3	0.9573	0.9559	0.088	0.9167	0.5	3	0.755337551020408	0.757762775510204	0.185275510204082	0.653356163265306	0.506666612244898	3	0.215412445918853	0.212311770503312	0.0832591056930451	0.204524859292461	0.0496309945955463
937	7 vs. 41	1	0.9029	0.9101	0.1485	0.8966	0.3958	1	0.89884612244898	0.903832	0.13500693877551	0.853011102040816	0.389999673469388	1	0.102650607765256	0.100856964519843	0.0636681222951117	0.130103373143979	0.0423790449114384
938	7 vs. 41	2	0.9895	0.9893	0.0703	0.9286	0.4167	2	0.98733412244898	0.985032326530612	0.0720954285714286	0.92485012244898	0.374998775510204	2	0.0100464514953486	0.0123890461273489	0.0270997599415362	0.0467822755882719	0.0481111504828868
939	7 vs. 41	3	0.9771	0.9756	0.0634	0.8148	0.4375	3	0.755337551020408	0.757762775510204	0.185275510204082	0.653356163265306	0.506666612244898	3	0.215412445918853	0.212311770503312	0.0832591056930451	0.204524859292461	0.0496309945955463
940	7 vs. 42	1	0.9948	0.9958	0.0344	0.963	0.4375	1	0.89884612244898	0.903832	0.13500693877551	0.853011102040816	0.389999673469388	1	0.102650607765256	0.100856964519843	0.0636681222951117	0.130103373143979	0.0423790449114384
941	7 vs. 42	2	0.9967	0.9957	0.0388	0.963	0.4375	2	0.98733412244898	0.985032326530612	0.0720954285714286	0.92485012244898	0.374998775510204	2	0.0100464514953486	0.0123890461273489	0.0270997599415362	0.0467822755882719	0.0481111504828868
942	7 vs. 42	3	0.9598	0.9561	0.0822	0.9167	0.5	3	0.755337551020408	0.757762775510204	0.185275510204082	0.653356163265306	0.506666612244898	3	0.215412445918853	0.212311770503312	0.0832591056930451	0.204524859292461	0.0496309945955463
943	7 vs. 43	1	0.9567	0.9568	0.0985	0.9286	0.4167	1	0.89884612244898	0.903832	0.13500693877551	0.853011102040816	0.389999673469388	1	0.102650607765256	0.100856964519843	0.0636681222951117	0.130103373143979	0.0423790449114384
944	7 vs. 43	2	0.9873	0.9844	0.0783	0.8966	0.3958	2	0.98733412244898	0.985032326530612	0.0720954285714286	0.92485012244898	0.374998775510204	2	0.0100464514953486	0.0123890461273489	0.0270997599415362	0.0467822755882719	0.0481111504828868
945	7 vs. 43	3	0.9663	0.9698	0.0765	1	0.4583	3	0.755337551020408	0.757762775510204	0.185275510204082	0.653356163265306	0.506666612244898	3	0.215412445918853	0.212311770503312	0.0832591056930451	0.204524859292461	0.0496309945955463
946	7 vs. 44	1	0.8577	0.858	0.1659	0.8	0.4792	1	0.89884612244898	0.903832	0.13500693877551	0.853011102040816	0.389999673469388	1	0.102650607765256	0.100856964519843	0.0636681222951117	0.130103373143979	0.0423790449114384
947	7 vs. 44	2	0.9973	0.9963	0.0361	1	0.4583	2	0.98733412244898	0.985032326530612	0.0720954285714286	0.92485012244898	0.374998775510204	2	0.0100464514953486	0.0123890461273489	0.0270997599415362	0.0467822755882719	0.0481111504828868
948	7 vs. 44	3	0.9373	0.9318	0.1032	0.8148	0.4375	3	0.755337551020408	0.757762775510204	0.185275510204082	0.653356163265306	0.506666612244898	3	0.215412445918853	0.212311770503312	0.0832591056930451	0.204524859292461	0.0496309945955463
949	7 vs. 45	1	0.9058	0.9141	0.1477	0.8966	0.3958	1	0.89884612244898	0.903832	0.13500693877551	0.853011102040816	0.389999673469388	1	0.102650607765256	0.100856964519843	0.0636681222951117	0.130103373143979	0.0423790449114384
950	7 vs. 45	2	0.9889	0.9883	0.0723	0.8667	0.375	2	0.98733412244898	0.985032326530612	0.0720954285714286	0.92485012244898	0.374998775510204	2	0.0100464514953486	0.0123890461273489	0.0270997599415362	0.0467822755882719	0.0481111504828868
951	7 vs. 45	3	0.8208	0.8327	0.1831	0.7826	0.5208	3	0.755337551020408	0.757762775510204	0.185275510204082	0.653356163265306	0.506666612244898	3	0.215412445918853	0.212311770503312	0.0832591056930451	0.204524859292461	0.0496309945955463
952	7 vs. 46	1	0.9256	0.926	0.1214	0.9655	0.3958	1	0.89884612244898	0.903832	0.13500693877551	0.853011102040816	0.389999673469388	1	0.102650607765256	0.100856964519843	0.0636681222951117	0.130103373143979	0.0423790449114384
953	7 vs. 46	2	0.9866	0.9822	0.0784	0.9286	0.4167	2	0.98733412244898	0.985032326530612	0.0720954285714286	0.92485012244898	0.374998775510204	2	0.0100464514953486	0.0123890461273489	0.0270997599415362	0.0467822755882719	0.0481111504828868
954	7 vs. 46	3	0.6558	0.7188	0.2337	0.1818	0.5417	3	0.755337551020408	0.757762775510204	0.185275510204082	0.653356163265306	0.506666612244898	3	0.215412445918853	0.212311770503312	0.0832591056930451	0.204524859292461	0.0496309945955463
955	7 vs. 47	1	0.9286	0.9286	0.1272	0.9032	0.3542	1	0.89884612244898	0.903832	0.13500693877551	0.853011102040816	0.389999673469388	1	0.102650607765256	0.100856964519843	0.0636681222951117	0.130103373143979	0.0423790449114384
956	7 vs. 47	2	0.9907	0.9888	0.0663	0.8966	0.3958	2	0.98733412244898	0.985032326530612	0.0720954285714286	0.92485012244898	0.374998775510204	2	0.0100464514953486	0.0123890461273489	0.0270997599415362	0.0467822755882719	0.0481111504828868
957	7 vs. 47	3	0.933	0.9366	0.1085	0.88	0.4792	3	0.755337551020408	0.757762775510204	0.185275510204082	0.653356163265306	0.506666612244898	3	0.215412445918853	0.212311770503312	0.0832591056930451	0.204524859292461	0.0496309945955463
958	7 vs. 48	1	0.934	0.9349	0.116	0.8	0.375	1	0.89884612244898	0.903832	0.13500693877551	0.853011102040816	0.389999673469388	1	0.102650607765256	0.100856964519843	0.0636681222951117	0.130103373143979	0.0423790449114384
959	7 vs. 48	2	0.9911	0.9885	0.0641	1	0.4583	2	0.98733412244898	0.985032326530612	0.0720954285714286	0.92485012244898	0.374998775510204	2	0.0100464514953486	0.0123890461273489	0.0270997599415362	0.0467822755882719	0.0481111504828868
960	7 vs. 48	3	0.8716	0.9059	0.1441	0.6	0.5833	3	0.755337551020408	0.757762775510204	0.185275510204082	0.653356163265306	0.506666612244898	3	0.215412445918853	0.212311770503312	0.0832591056930451	0.204524859292461	0.0496309945955463
961	7 vs. 49	1	0.8837	0.8886	0.1658	0.8966	0.3958	1	0.89884612244898	0.903832	0.13500693877551	0.853011102040816	0.389999673469388	1	0.102650607765256	0.100856964519843	0.0636681222951117	0.130103373143979	0.0423790449114384
962	7 vs. 49	2	0.9893	0.9876	0.0714	0.8966	0.3958	2	0.98733412244898	0.985032326530612	0.0720954285714286	0.92485012244898	0.374998775510204	2	0.0100464514953486	0.0123890461273489	0.0270997599415362	0.0467822755882719	0.0481111504828868
963	7 vs. 49	3	0.9186	0.9253	0.1226	0.8333	0.5	3	0.755337551020408	0.757762775510204	0.185275510204082	0.653356163265306	0.506666612244898	3	0.215412445918853	0.212311770503312	0.0832591056930451	0.204524859292461	0.0496309945955463
964	7 vs. 50	1	0.943	0.9498	0.1094	0.8276	0.3958	1	0.89884612244898	0.903832	0.13500693877551	0.853011102040816	0.389999673469388	1	0.102650607765256	0.100856964519843	0.0636681222951117	0.130103373143979	0.0423790449114384
965	7 vs. 50	2	0.9939	0.9916	0.0528	1	0.4583	2	0.98733412244898	0.985032326530612	0.0720954285714286	0.92485012244898	0.374998775510204	2	0.0100464514953486	0.0123890461273489	0.0270997599415362	0.0467822755882719	0.0481111504828868
966	7 vs. 50	3	0.9619	0.9618	0.0802	0.7857	0.4167	3	0.755337551020408	0.757762775510204	0.185275510204082	0.653356163265306	0.506666612244898	3	0.215412445918853	0.212311770503312	0.0832591056930451	0.204524859292461	0.0496309945955463
967	8 vs. 9	1	0.9255	0.9274	0.1213	0.7692	0.4583	1	0.89884612244898	0.903832	0.13500693877551	0.853011102040816	0.389999673469388	1	0.102650607765256	0.100856964519843	0.0636681222951117	0.130103373143979	0.0423790449114384
968	8 vs. 9	2	0.9909	0.9889	0.0646	0.963	0.4375	2	0.98733412244898	0.985032326530612	0.0720954285714286	0.92485012244898	0.374998775510204	2	0.0100464514953486	0.0123890461273489	0.0270997599415362	0.0467822755882719	0.0481111504828868
969	8 vs. 9	3	0.3878	0.3894	0.3186	0.4	0.4792	3	0.755337551020408	0.757762775510204	0.185275510204082	0.653356163265306	0.506666612244898	3	0.215412445918853	0.212311770503312	0.0832591056930451	0.204524859292461	0.0496309945955463
970	8 vs. 10	1	0.9421	0.95	0.1072	0.8148	0.4375	1	0.89884612244898	0.903832	0.13500693877551	0.853011102040816	0.389999673469388	1	0.102650607765256	0.100856964519843	0.0636681222951117	0.130103373143979	0.0423790449114384
971	8 vs. 10	2	0.9914	0.9898	0.0628	0.963	0.4375	2	0.98733412244898	0.985032326530612	0.0720954285714286	0.92485012244898	0.374998775510204	2	0.0100464514953486	0.0123890461273489	0.0270997599415362	0.0467822755882719	0.0481111504828868
972	8 vs. 10	3	0.7562	0.7344	0.2023	0.64	0.4792	3	0.755337551020408	0.757762775510204	0.185275510204082	0.653356163265306	0.506666612244898	3	0.215412445918853	0.212311770503312	0.0832591056930451	0.204524859292461	0.0496309945955463
973	8 vs. 11	1	0.9137	0.9133	0.1382	0.9286	0.4167	1	0.89884612244898	0.903832	0.13500693877551	0.853011102040816	0.389999673469388	1	0.102650607765256	0.100856964519843	0.0636681222951117	0.130103373143979	0.0423790449114384
974	8 vs. 11	2	0.9935	0.9914	0.0543	1	0.4167	2	0.98733412244898	0.985032326530612	0.0720954285714286	0.92485012244898	0.374998775510204	2	0.0100464514953486	0.0123890461273489	0.0270997599415362	0.0467822755882719	0.0481111504828868
975	8 vs. 11	3	0.9446	0.9339	0.1	0.8462	0.4583	3	0.755337551020408	0.757762775510204	0.185275510204082	0.653356163265306	0.506666612244898	3	0.215412445918853	0.212311770503312	0.0832591056930451	0.204524859292461	0.0496309945955463
976	8 vs. 12	1	0.7522	0.7493	0.235	0.8148	0.4375	1	0.89884612244898	0.903832	0.13500693877551	0.853011102040816	0.389999673469388	1	0.102650607765256	0.100856964519843	0.0636681222951117	0.130103373143979	0.0423790449114384
977	8 vs. 12	2	0.9773	0.9715	0.1031	0.9032	0.3542	2	0.98733412244898	0.985032326530612	0.0720954285714286	0.92485012244898	0.374998775510204	2	0.0100464514953486	0.0123890461273489	0.0270997599415362	0.0467822755882719	0.0481111504828868
978	8 vs. 12	3	0.9246	0.9174	0.1166	0.88	0.4792	3	0.755337551020408	0.757762775510204	0.185275510204082	0.653356163265306	0.506666612244898	3	0.215412445918853	0.212311770503312	0.0832591056930451	0.204524859292461	0.0496309945955463
979	8 vs. 13	1	0.8447	0.843	0.1713	0.7586	0.3958	1	0.89884612244898	0.903832	0.13500693877551	0.853011102040816	0.389999673469388	1	0.102650607765256	0.100856964519843	0.0636681222951117	0.130103373143979	0.0423790449114384
980	8 vs. 13	2	0.979	0.9726	0.0991	0.963	0.4375	2	0.98733412244898	0.985032326530612	0.0720954285714286	0.92485012244898	0.374998775510204	2	0.0100464514953486	0.0123890461273489	0.0270997599415362	0.0467822755882719	0.0481111504828868
981	8 vs. 13	3	0.9455	0.9342	0.0999	0.8333	0.5	3	0.755337551020408	0.757762775510204	0.185275510204082	0.653356163265306	0.506666612244898	3	0.215412445918853	0.212311770503312	0.0832591056930451	0.204524859292461	0.0496309945955463
982	8 vs. 14	1	0.8331	0.8308	0.1888	0.8889	0.4375	1	0.89884612244898	0.903832	0.13500693877551	0.853011102040816	0.389999673469388	1	0.102650607765256	0.100856964519843	0.0636681222951117	0.130103373143979	0.0423790449114384
983	8 vs. 14	2	0.9832	0.9775	0.0884	0.8966	0.3958	2	0.98733412244898	0.985032326530612	0.0720954285714286	0.92485012244898	0.374998775510204	2	0.0100464514953486	0.0123890461273489	0.0270997599415362	0.0467822755882719	0.0481111504828868
984	8 vs. 14	3	0.8145	0.7735	0.1774	0.5833	0.5	3	0.755337551020408	0.757762775510204	0.185275510204082	0.653356163265306	0.506666612244898	3	0.215412445918853	0.212311770503312	0.0832591056930451	0.204524859292461	0.0496309945955463
985	8 vs. 15	1	0.893	0.8916	0.1499	0.8966	0.3958	1	0.89884612244898	0.903832	0.13500693877551	0.853011102040816	0.389999673469388	1	0.102650607765256	0.100856964519843	0.0636681222951117	0.130103373143979	0.0423790449114384
986	8 vs. 15	2	0.9858	0.9811	0.0805	0.9655	0.3958	2	0.98733412244898	0.985032326530612	0.0720954285714286	0.92485012244898	0.374998775510204	2	0.0100464514953486	0.0123890461273489	0.0270997599415362	0.0467822755882719	0.0481111504828868
987	8 vs. 15	3	0.8178	0.7807	0.1768	0.72	0.4792	3	0.755337551020408	0.757762775510204	0.185275510204082	0.653356163265306	0.506666612244898	3	0.215412445918853	0.212311770503312	0.0832591056930451	0.204524859292461	0.0496309945955463
988	8 vs. 16	1	0.9151	0.9288	0.1342	0.6923	0.4583	1	0.89884612244898	0.903832	0.13500693877551	0.853011102040816	0.389999673469388	1	0.102650607765256	0.100856964519843	0.0636681222951117	0.130103373143979	0.0423790449114384
989	8 vs. 16	2	0.9838	0.9834	0.0862	0.9286	0.4167	2	0.98733412244898	0.985032326530612	0.0720954285714286	0.92485012244898	0.374998775510204	2	0.0100464514953486	0.0123890461273489	0.0270997599415362	0.0467822755882719	0.0481111504828868
990	8 vs. 16	3	0.1943	0.2328	0.3649	0.2308	0.4583	3	0.755337551020408	0.757762775510204	0.185275510204082	0.653356163265306	0.506666612244898	3	0.215412445918853	0.212311770503312	0.0832591056930451	0.204524859292461	0.0496309945955463
991	8 vs. 17	1	0.8137	0.8114	0.1992	0.9286	0.4167	1	0.89884612244898	0.903832	0.13500693877551	0.853011102040816	0.389999673469388	1	0.102650607765256	0.100856964519843	0.0636681222951117	0.130103373143979	0.0423790449114384
992	8 vs. 17	2	0.9876	0.9836	0.0758	0.9655	0.3958	2	0.98733412244898	0.985032326530612	0.0720954285714286	0.92485012244898	0.374998775510204	2	0.0100464514953486	0.0123890461273489	0.0270997599415362	0.0467822755882719	0.0481111504828868
993	8 vs. 17	3	0.9734	0.9682	0.0739	0.8696	0.5208	3	0.755337551020408	0.757762775510204	0.185275510204082	0.653356163265306	0.506666612244898	3	0.215412445918853	0.212311770503312	0.0832591056930451	0.204524859292461	0.0496309945955463
994	8 vs. 18	1	0.8821	0.8877	0.1604	0.8276	0.3958	1	0.89884612244898	0.903832	0.13500693877551	0.853011102040816	0.389999673469388	1	0.102650607765256	0.100856964519843	0.0636681222951117	0.130103373143979	0.0423790449114384
995	8 vs. 18	2	0.984	0.9804	0.0859	0.8966	0.3958	2	0.98733412244898	0.985032326530612	0.0720954285714286	0.92485012244898	0.374998775510204	2	0.0100464514953486	0.0123890461273489	0.0270997599415362	0.0467822755882719	0.0481111504828868
996	8 vs. 18	3	0.8016	0.8116	0.1797	0.72	0.4792	3	0.755337551020408	0.757762775510204	0.185275510204082	0.653356163265306	0.506666612244898	3	0.215412445918853	0.212311770503312	0.0832591056930451	0.204524859292461	0.0496309945955463
997	8 vs. 19	1	0.8725	0.8717	0.162	0.8276	0.3958	1	0.89884612244898	0.903832	0.13500693877551	0.853011102040816	0.389999673469388	1	0.102650607765256	0.100856964519843	0.0636681222951117	0.130103373143979	0.0423790449114384
998	8 vs. 19	2	0.9818	0.9757	0.0917	0.8966	0.3958	2	0.98733412244898	0.985032326530612	0.0720954285714286	0.92485012244898	0.374998775510204	2	0.0100464514953486	0.0123890461273489	0.0270997599415362	0.0467822755882719	0.0481111504828868
999	8 vs. 19	3	0.846	0.821	0.1583	0.7692	0.4583	3	0.755337551020408	0.757762775510204	0.185275510204082	0.653356163265306	0.506666612244898	3	0.215412445918853	0.212311770503312	0.0832591056930451	0.204524859292461	0.0496309945955463
1000	8 vs. 20	1	0.857	0.8611	0.1698	0.88	0.4792	1	0.89884612244898	0.903832	0.13500693877551	0.853011102040816	0.389999673469388	1	0.102650607765256	0.100856964519843	0.0636681222951117	0.130103373143979	0.0423790449114384
1001	8 vs. 20	2	0.989	0.9879	0.0707	0.963	0.4375	2	0.98733412244898	0.985032326530612	0.0720954285714286	0.92485012244898	0.374998775510204	2	0.0100464514953486	0.0123890461273489	0.0270997599415362	0.0467822755882719	0.0481111504828868
1002	8 vs. 20	3	0.9492	0.9532	0.0937	0.8182	0.5417	3	0.755337551020408	0.757762775510204	0.185275510204082	0.653356163265306	0.506666612244898	3	0.215412445918853	0.212311770503312	0.0832591056930451	0.204524859292461	0.0496309945955463
1003	8 vs. 21	1	0.8167	0.8179	0.1975	0.9286	0.4167	1	0.89884612244898	0.903832	0.13500693877551	0.853011102040816	0.389999673469388	1	0.102650607765256	0.100856964519843	0.0636681222951117	0.130103373143979	0.0423790449114384
1004	8 vs. 21	2	0.9554	0.948	0.1448	0.8485	0.3125	2	0.98733412244898	0.985032326530612	0.0720954285714286	0.92485012244898	0.374998775510204	2	0.0100464514953486	0.0123890461273489	0.0270997599415362	0.0467822755882719	0.0481111504828868
1005	8 vs. 21	3	0.2384	0.2634	0.3405	0.25	0.5	3	0.755337551020408	0.757762775510204	0.185275510204082	0.653356163265306	0.506666612244898	3	0.215412445918853	0.212311770503312	0.0832591056930451	0.204524859292461	0.0496309945955463
1006	8 vs. 22	1	0.8212	0.8228	0.1941	0.8889	0.4375	1	0.89884612244898	0.903832	0.13500693877551	0.853011102040816	0.389999673469388	1	0.102650607765256	0.100856964519843	0.0636681222951117	0.130103373143979	0.0423790449114384
1007	8 vs. 22	2	0.9886	0.9854	0.0722	0.9333	0.375	2	0.98733412244898	0.985032326530612	0.0720954285714286	0.92485012244898	0.374998775510204	2	0.0100464514953486	0.0123890461273489	0.0270997599415362	0.0467822755882719	0.0481111504828868
1008	8 vs. 22	3	0.9118	0.9229	0.1218	0.8696	0.5208	3	0.755337551020408	0.757762775510204	0.185275510204082	0.653356163265306	0.506666612244898	3	0.215412445918853	0.212311770503312	0.0832591056930451	0.204524859292461	0.0496309945955463
1009	8 vs. 23	1	0.9319	0.9316	0.1192	0.8667	0.375	1	0.89884612244898	0.903832	0.13500693877551	0.853011102040816	0.389999673469388	1	0.102650607765256	0.100856964519843	0.0636681222951117	0.130103373143979	0.0423790449114384
1010	8 vs. 23	2	0.9872	0.9841	0.0768	0.963	0.4375	2	0.98733412244898	0.985032326530612	0.0720954285714286	0.92485012244898	0.374998775510204	2	0.0100464514953486	0.0123890461273489	0.0270997599415362	0.0467822755882719	0.0481111504828868
1011	8 vs. 23	3	0.9493	0.9409	0.0936	0.8333	0.5	3	0.755337551020408	0.757762775510204	0.185275510204082	0.653356163265306	0.506666612244898	3	0.215412445918853	0.212311770503312	0.0832591056930451	0.204524859292461	0.0496309945955463
1012	8 vs. 24	1	0.8256	0.8234	0.1997	0.9286	0.4167	1	0.89884612244898	0.903832	0.13500693877551	0.853011102040816	0.389999673469388	1	0.102650607765256	0.100856964519843	0.0636681222951117	0.130103373143979	0.0423790449114384
1013	8 vs. 24	2	0.987	0.9828	0.0774	0.9333	0.375	2	0.98733412244898	0.985032326530612	0.0720954285714286	0.92485012244898	0.374998775510204	2	0.0100464514953486	0.0123890461273489	0.0270997599415362	0.0467822755882719	0.0481111504828868
1014	8 vs. 24	3	0.9652	0.9579	0.0813	0.9565	0.5208	3	0.755337551020408	0.757762775510204	0.185275510204082	0.653356163265306	0.506666612244898	3	0.215412445918853	0.212311770503312	0.0832591056930451	0.204524859292461	0.0496309945955463
1015	8 vs. 25	1	0.7985	0.798	0.2083	0.9286	0.4167	1	0.89884612244898	0.903832	0.13500693877551	0.853011102040816	0.389999673469388	1	0.102650607765256	0.100856964519843	0.0636681222951117	0.130103373143979	0.0423790449114384
1016	8 vs. 25	2	0.969	0.9605	0.1205	0.9333	0.375	2	0.98733412244898	0.985032326530612	0.0720954285714286	0.92485012244898	0.374998775510204	2	0.0100464514953486	0.0123890461273489	0.0270997599415362	0.0467822755882719	0.0481111504828868
1017	8 vs. 25	3	0.6467	0.6846	0.2366	0.5455	0.5417	3	0.755337551020408	0.757762775510204	0.185275510204082	0.653356163265306	0.506666612244898	3	0.215412445918853	0.212311770503312	0.0832591056930451	0.204524859292461	0.0496309945955463
1018	8 vs. 26	1	0.8928	0.8915	0.1555	0.8966	0.3958	1	0.89884612244898	0.903832	0.13500693877551	0.853011102040816	0.389999673469388	1	0.102650607765256	0.100856964519843	0.0636681222951117	0.130103373143979	0.0423790449114384
1019	8 vs. 26	2	0.9914	0.9886	0.0629	1	0.4167	2	0.98733412244898	0.985032326530612	0.0720954285714286	0.92485012244898	0.374998775510204	2	0.0100464514953486	0.0123890461273489	0.0270997599415362	0.0467822755882719	0.0481111504828868
1020	8 vs. 26	3	0.9394	0.9279	0.1013	0.8696	0.5208	3	0.755337551020408	0.757762775510204	0.185275510204082	0.653356163265306	0.506666612244898	3	0.215412445918853	0.212311770503312	0.0832591056930451	0.204524859292461	0.0496309945955463
1021	8 vs. 27	1	0.863	0.8678	0.1689	0.7742	0.3542	1	0.89884612244898	0.903832	0.13500693877551	0.853011102040816	0.389999673469388	1	0.102650607765256	0.100856964519843	0.0636681222951117	0.130103373143979	0.0423790449114384
1022	8 vs. 27	2	0.9777	0.9702	0.1017	0.9286	0.4167	2	0.98733412244898	0.985032326530612	0.0720954285714286	0.92485012244898	0.374998775510204	2	0.0100464514953486	0.0123890461273489	0.0270997599415362	0.0467822755882719	0.0481111504828868
1023	8 vs. 27	3	0.4048	0.4187	0.3077	0.4348	0.5208	3	0.755337551020408	0.757762775510204	0.185275510204082	0.653356163265306	0.506666612244898	3	0.215412445918853	0.212311770503312	0.0832591056930451	0.204524859292461	0.0496309945955463
1024	8 vs. 28	1	0.9036	0.9046	0.1449	0.88	0.4792	1	0.89884612244898	0.903832	0.13500693877551	0.853011102040816	0.389999673469388	1	0.102650607765256	0.100856964519843	0.0636681222951117	0.130103373143979	0.0423790449114384
1025	8 vs. 28	2	0.9832	0.9776	0.0886	0.8966	0.3958	2	0.98733412244898	0.985032326530612	0.0720954285714286	0.92485012244898	0.374998775510204	2	0.0100464514953486	0.0123890461273489	0.0270997599415362	0.0467822755882719	0.0481111504828868
1026	8 vs. 28	3	0.6717	0.648	0.2364	0.6087	0.5208	3	0.755337551020408	0.757762775510204	0.185275510204082	0.653356163265306	0.506666612244898	3	0.215412445918853	0.212311770503312	0.0832591056930451	0.204524859292461	0.0496309945955463
1027	8 vs. 29	1	0.95	0.9548	0.102	0.8889	0.4375	1	0.89884612244898	0.903832	0.13500693877551	0.853011102040816	0.389999673469388	1	0.102650607765256	0.100856964519843	0.0636681222951117	0.130103373143979	0.0423790449114384
1028	8 vs. 29	2	0.9933	0.9946	0.0549	0.963	0.4375	2	0.98733412244898	0.985032326530612	0.0720954285714286	0.92485012244898	0.374998775510204	2	0.0100464514953486	0.0123890461273489	0.0270997599415362	0.0467822755882719	0.0481111504828868
1029	8 vs. 29	3	0.8679	0.8545	0.1526	0.75	0.5	3	0.755337551020408	0.757762775510204	0.185275510204082	0.653356163265306	0.506666612244898	3	0.215412445918853	0.212311770503312	0.0832591056930451	0.204524859292461	0.0496309945955463
1030	8 vs. 30	1	0.7918	0.7911	0.2136	0.8148	0.4375	1	0.89884612244898	0.903832	0.13500693877551	0.853011102040816	0.389999673469388	1	0.102650607765256	0.100856964519843	0.0636681222951117	0.130103373143979	0.0423790449114384
1031	8 vs. 30	2	0.977	0.9729	0.1042	0.9032	0.3542	2	0.98733412244898	0.985032326530612	0.0720954285714286	0.92485012244898	0.374998775510204	2	0.0100464514953486	0.0123890461273489	0.0270997599415362	0.0467822755882719	0.0481111504828868
1032	8 vs. 30	3	0.8259	0.8319	0.1687	0.5714	0.5625	3	0.755337551020408	0.757762775510204	0.185275510204082	0.653356163265306	0.506666612244898	3	0.215412445918853	0.212311770503312	0.0832591056930451	0.204524859292461	0.0496309945955463
1033	8 vs. 31	1	0.9218	0.9208	0.1274	0.8889	0.4375	1	0.89884612244898	0.903832	0.13500693877551	0.853011102040816	0.389999673469388	1	0.102650607765256	0.100856964519843	0.0636681222951117	0.130103373143979	0.0423790449114384
1034	8 vs. 31	2	0.992	0.9895	0.0602	1	0.4167	2	0.98733412244898	0.985032326530612	0.0720954285714286	0.92485012244898	0.374998775510204	2	0.0100464514953486	0.0123890461273489	0.0270997599415362	0.0467822755882719	0.0481111504828868
1035	8 vs. 31	3	0.9786	0.9741	0.0629	0.88	0.4792	3	0.755337551020408	0.757762775510204	0.185275510204082	0.653356163265306	0.506666612244898	3	0.215412445918853	0.212311770503312	0.0832591056930451	0.204524859292461	0.0496309945955463
1036	8 vs. 32	1	0.7401	0.7385	0.2334	0.8889	0.4375	1	0.89884612244898	0.903832	0.13500693877551	0.853011102040816	0.389999673469388	1	0.102650607765256	0.100856964519843	0.0636681222951117	0.130103373143979	0.0423790449114384
1037	8 vs. 32	2	0.9743	0.9672	0.1094	0.8667	0.375	2	0.98733412244898	0.985032326530612	0.0720954285714286	0.92485012244898	0.374998775510204	2	0.0100464514953486	0.0123890461273489	0.0270997599415362	0.0467822755882719	0.0481111504828868
1038	8 vs. 32	3	0.8475	0.8445	0.1592	0.6667	0.5	3	0.755337551020408	0.757762775510204	0.185275510204082	0.653356163265306	0.506666612244898	3	0.215412445918853	0.212311770503312	0.0832591056930451	0.204524859292461	0.0496309945955463
1039	8 vs. 33	1	0.8744	0.8899	0.1556	0.6667	0.5	1	0.89884612244898	0.903832	0.13500693877551	0.853011102040816	0.389999673469388	1	0.102650607765256	0.100856964519843	0.0636681222951117	0.130103373143979	0.0423790449114384
1040	8 vs. 33	2	0.9852	0.9832	0.0821	0.963	0.4375	2	0.98733412244898	0.985032326530612	0.0720954285714286	0.92485012244898	0.374998775510204	2	0.0100464514953486	0.0123890461273489	0.0270997599415362	0.0467822755882719	0.0481111504828868
1041	8 vs. 33	3	0.6657	0.6482	0.2327	0.5	0.5	3	0.755337551020408	0.757762775510204	0.185275510204082	0.653356163265306	0.506666612244898	3	0.215412445918853	0.212311770503312	0.0832591056930451	0.204524859292461	0.0496309945955463
1042	8 vs. 34	1	0.7932	0.7906	0.2115	0.8889	0.4375	1	0.89884612244898	0.903832	0.13500693877551	0.853011102040816	0.389999673469388	1	0.102650607765256	0.100856964519843	0.0636681222951117	0.130103373143979	0.0423790449114384
1043	8 vs. 34	2	0.9848	0.9798	0.0835	0.8966	0.3958	2	0.98733412244898	0.985032326530612	0.0720954285714286	0.92485012244898	0.374998775510204	2	0.0100464514953486	0.0123890461273489	0.0270997599415362	0.0467822755882719	0.0481111504828868
1044	8 vs. 34	3	0.8312	0.8038	0.169	0.5833	0.5	3	0.755337551020408	0.757762775510204	0.185275510204082	0.653356163265306	0.506666612244898	3	0.215412445918853	0.212311770503312	0.0832591056930451	0.204524859292461	0.0496309945955463
1045	8 vs. 35	1	0.7579	0.757	0.2286	0.8276	0.3958	1	0.89884612244898	0.903832	0.13500693877551	0.853011102040816	0.389999673469388	1	0.102650607765256	0.100856964519843	0.0636681222951117	0.130103373143979	0.0423790449114384
1046	8 vs. 35	2	0.9736	0.9652	0.1118	0.9333	0.375	2	0.98733412244898	0.985032326530612	0.0720954285714286	0.92485012244898	0.374998775510204	2	0.0100464514953486	0.0123890461273489	0.0270997599415362	0.0467822755882719	0.0481111504828868
1047	8 vs. 35	3	0.873	0.8745	0.1473	0.8333	0.5	3	0.755337551020408	0.757762775510204	0.185275510204082	0.653356163265306	0.506666612244898	3	0.215412445918853	0.212311770503312	0.0832591056930451	0.204524859292461	0.0496309945955463
1048	8 vs. 36	1	0.7814	0.7787	0.2183	0.8966	0.3958	1	0.89884612244898	0.903832	0.13500693877551	0.853011102040816	0.389999673469388	1	0.102650607765256	0.100856964519843	0.0636681222951117	0.130103373143979	0.0423790449114384
1049	8 vs. 36	2	0.979	0.9732	0.0993	0.875	0.3333	2	0.98733412244898	0.985032326530612	0.0720954285714286	0.92485012244898	0.374998775510204	2	0.0100464514953486	0.0123890461273489	0.0270997599415362	0.0467822755882719	0.0481111504828868
1050	8 vs. 36	3	0.9733	0.9677	0.0684	0.9091	0.5417	3	0.755337551020408	0.757762775510204	0.185275510204082	0.653356163265306	0.506666612244898	3	0.215412445918853	0.212311770503312	0.0832591056930451	0.204524859292461	0.0496309945955463
1051	8 vs. 37	1	0.9394	0.9461	0.1142	0.8276	0.3958	1	0.89884612244898	0.903832	0.13500693877551	0.853011102040816	0.389999673469388	1	0.102650607765256	0.100856964519843	0.0636681222951117	0.130103373143979	0.0423790449114384
1052	8 vs. 37	2	0.9877	0.9866	0.075	0.963	0.4375	2	0.98733412244898	0.985032326530612	0.0720954285714286	0.92485012244898	0.374998775510204	2	0.0100464514953486	0.0123890461273489	0.0270997599415362	0.0467822755882719	0.0481111504828868
1053	8 vs. 37	3	0.7745	0.7479	0.1944	0.64	0.4792	3	0.755337551020408	0.757762775510204	0.185275510204082	0.653356163265306	0.506666612244898	3	0.215412445918853	0.212311770503312	0.0832591056930451	0.204524859292461	0.0496309945955463
1054	8 vs. 38	1	0.895	0.8939	0.1501	0.9286	0.4167	1	0.89884612244898	0.903832	0.13500693877551	0.853011102040816	0.389999673469388	1	0.102650607765256	0.100856964519843	0.0636681222951117	0.130103373143979	0.0423790449114384
1055	8 vs. 38	2	0.9827	0.9777	0.0903	0.9032	0.3542	2	0.98733412244898	0.985032326530612	0.0720954285714286	0.92485012244898	0.374998775510204	2	0.0100464514953486	0.0123890461273489	0.0270997599415362	0.0467822755882719	0.0481111504828868
1056	8 vs. 38	3	0.7266	0.7445	0.2106	0.6364	0.5417	3	0.755337551020408	0.757762775510204	0.185275510204082	0.653356163265306	0.506666612244898	3	0.215412445918853	0.212311770503312	0.0832591056930451	0.204524859292461	0.0496309945955463
1057	8 vs. 39	1	0.8613	0.8615	0.1699	0.9286	0.4167	1	0.89884612244898	0.903832	0.13500693877551	0.853011102040816	0.389999673469388	1	0.102650607765256	0.100856964519843	0.0636681222951117	0.130103373143979	0.0423790449114384
1058	8 vs. 39	2	0.9861	0.9815	0.0811	0.9333	0.375	2	0.98733412244898	0.985032326530612	0.0720954285714286	0.92485012244898	0.374998775510204	2	0.0100464514953486	0.0123890461273489	0.0270997599415362	0.0467822755882719	0.0481111504828868
1059	8 vs. 39	3	0.8446	0.8108	0.1664	0.7826	0.5208	3	0.755337551020408	0.757762775510204	0.185275510204082	0.653356163265306	0.506666612244898	3	0.215412445918853	0.212311770503312	0.0832591056930451	0.204524859292461	0.0496309945955463
1060	8 vs. 40	1	0.7013	0.7018	0.2569	0.8571	0.4167	1	0.89884612244898	0.903832	0.13500693877551	0.853011102040816	0.389999673469388	1	0.102650607765256	0.100856964519843	0.0636681222951117	0.130103373143979	0.0423790449114384
1061	8 vs. 40	2	0.966	0.9587	0.1264	0.875	0.3333	2	0.98733412244898	0.985032326530612	0.0720954285714286	0.92485012244898	0.374998775510204	2	0.0100464514953486	0.0123890461273489	0.0270997599415362	0.0467822755882719	0.0481111504828868
1062	8 vs. 40	3	0.9603	0.9543	0.0848	0.8696	0.5208	3	0.755337551020408	0.757762775510204	0.185275510204082	0.653356163265306	0.506666612244898	3	0.215412445918853	0.212311770503312	0.0832591056930451	0.204524859292461	0.0496309945955463
1063	8 vs. 41	1	0.7855	0.7829	0.2163	0.9286	0.4167	1	0.89884612244898	0.903832	0.13500693877551	0.853011102040816	0.389999673469388	1	0.102650607765256	0.100856964519843	0.0636681222951117	0.130103373143979	0.0423790449114384
1064	8 vs. 41	2	0.9756	0.9684	0.1068	0.8966	0.3958	2	0.98733412244898	0.985032326530612	0.0720954285714286	0.92485012244898	0.374998775510204	2	0.0100464514953486	0.0123890461273489	0.0270997599415362	0.0467822755882719	0.0481111504828868
1065	8 vs. 41	3	0.921	0.9125	0.1177	0.7692	0.4583	3	0.755337551020408	0.757762775510204	0.185275510204082	0.653356163265306	0.506666612244898	3	0.215412445918853	0.212311770503312	0.0832591056930451	0.204524859292461	0.0496309945955463
1066	8 vs. 42	1	0.9493	0.9491	0.1038	0.9231	0.4583	1	0.89884612244898	0.903832	0.13500693877551	0.853011102040816	0.389999673469388	1	0.102650607765256	0.100856964519843	0.0636681222951117	0.130103373143979	0.0423790449114384
1067	8 vs. 42	2	0.9948	0.9935	0.0486	1	0.4167	2	0.98733412244898	0.985032326530612	0.0720954285714286	0.92485012244898	0.374998775510204	2	0.0100464514953486	0.0123890461273489	0.0270997599415362	0.0467822755882719	0.0481111504828868
1068	8 vs. 42	3	0.8997	0.8948	0.1289	0.8696	0.5208	3	0.755337551020408	0.757762775510204	0.185275510204082	0.653356163265306	0.506666612244898	3	0.215412445918853	0.212311770503312	0.0832591056930451	0.204524859292461	0.0496309945955463
1069	8 vs. 43	1	0.8608	0.8609	0.1728	0.8889	0.4375	1	0.89884612244898	0.903832	0.13500693877551	0.853011102040816	0.389999673469388	1	0.102650607765256	0.100856964519843	0.0636681222951117	0.130103373143979	0.0423790449114384
1070	8 vs. 43	2	0.97	0.9602	0.1194	0.9333	0.375	2	0.98733412244898	0.985032326530612	0.0720954285714286	0.92485012244898	0.374998775510204	2	0.0100464514953486	0.0123890461273489	0.0270997599415362	0.0467822755882719	0.0481111504828868
1071	8 vs. 43	3	0.9512	0.9414	0.0922	0.8	0.4792	3	0.755337551020408	0.757762775510204	0.185275510204082	0.653356163265306	0.506666612244898	3	0.215412445918853	0.212311770503312	0.0832591056930451	0.204524859292461	0.0496309945955463
1072	8 vs. 44	1	0.9438	0.9483	0.1014	0.75	0.5	1	0.89884612244898	0.903832	0.13500693877551	0.853011102040816	0.389999673469388	1	0.102650607765256	0.100856964519843	0.0636681222951117	0.130103373143979	0.0423790449114384
1073	8 vs. 44	2	0.9941	0.9926	0.0528	0.963	0.4375	2	0.98733412244898	0.985032326530612	0.0720954285714286	0.92485012244898	0.374998775510204	2	0.0100464514953486	0.0123890461273489	0.0270997599415362	0.0467822755882719	0.0481111504828868
1074	8 vs. 44	3	0.9351	0.9275	0.1053	0.6923	0.4583	3	0.755337551020408	0.757762775510204	0.185275510204082	0.653356163265306	0.506666612244898	3	0.215412445918853	0.212311770503312	0.0832591056930451	0.204524859292461	0.0496309945955463
1075	8 vs. 45	1	0.7803	0.7778	0.2205	0.8571	0.4167	1	0.89884612244898	0.903832	0.13500693877551	0.853011102040816	0.389999673469388	1	0.102650607765256	0.100856964519843	0.0636681222951117	0.130103373143979	0.0423790449114384
1076	8 vs. 45	2	0.9739	0.966	0.1105	0.9032	0.3542	2	0.98733412244898	0.985032326530612	0.0720954285714286	0.92485012244898	0.374998775510204	2	0.0100464514953486	0.0123890461273489	0.0270997599415362	0.0467822755882719	0.0481111504828868
1077	8 vs. 45	3	0.9413	0.9428	0.1064	0.9091	0.5417	3	0.755337551020408	0.757762775510204	0.185275510204082	0.653356163265306	0.506666612244898	3	0.215412445918853	0.212311770503312	0.0832591056930451	0.204524859292461	0.0496309945955463
1078	8 vs. 46	1	0.9418	0.9418	0.1044	0.8571	0.4167	1	0.89884612244898	0.903832	0.13500693877551	0.853011102040816	0.389999673469388	1	0.102650607765256	0.100856964519843	0.0636681222951117	0.130103373143979	0.0423790449114384
1079	8 vs. 46	2	0.987	0.9826	0.0765	0.8966	0.3958	2	0.98733412244898	0.985032326530612	0.0720954285714286	0.92485012244898	0.374998775510204	2	0.0100464514953486	0.0123890461273489	0.0270997599415362	0.0467822755882719	0.0481111504828868
1080	8 vs. 46	3	0.326	0.4046	0.3271	0.1905	0.5625	3	0.755337551020408	0.757762775510204	0.185275510204082	0.653356163265306	0.506666612244898	3	0.215412445918853	0.212311770503312	0.0832591056930451	0.204524859292461	0.0496309945955463
1081	8 vs. 47	1	0.8235	0.8234	0.1959	0.8667	0.375	1	0.89884612244898	0.903832	0.13500693877551	0.853011102040816	0.389999673469388	1	0.102650607765256	0.100856964519843	0.0636681222951117	0.130103373143979	0.0423790449114384
1082	8 vs. 47	2	0.976	0.968	0.106	0.9333	0.375	2	0.98733412244898	0.985032326530612	0.0720954285714286	0.92485012244898	0.374998775510204	2	0.0100464514953486	0.0123890461273489	0.0270997599415362	0.0467822755882719	0.0481111504828868
1083	8 vs. 47	3	0.9403	0.9273	0.1026	0.9167	0.5	3	0.755337551020408	0.757762775510204	0.185275510204082	0.653356163265306	0.506666612244898	3	0.215412445918853	0.212311770503312	0.0832591056930451	0.204524859292461	0.0496309945955463
1084	8 vs. 48	1	0.9024	0.9016	0.1386	0.8276	0.3958	1	0.89884612244898	0.903832	0.13500693877551	0.853011102040816	0.389999673469388	1	0.102650607765256	0.100856964519843	0.0636681222951117	0.130103373143979	0.0423790449114384
1085	8 vs. 48	2	0.9893	0.9858	0.0693	0.963	0.4375	2	0.98733412244898	0.985032326530612	0.0720954285714286	0.92485012244898	0.374998775510204	2	0.0100464514953486	0.0123890461273489	0.0270997599415362	0.0467822755882719	0.0481111504828868
1086	8 vs. 48	3	0.7951	0.8657	0.1818	0.5263	0.6042	3	0.755337551020408	0.757762775510204	0.185275510204082	0.653356163265306	0.506666612244898	3	0.215412445918853	0.212311770503312	0.0832591056930451	0.204524859292461	0.0496309945955463
1087	8 vs. 49	1	0.7436	0.7398	0.2405	0.9286	0.4167	1	0.89884612244898	0.903832	0.13500693877551	0.853011102040816	0.389999673469388	1	0.102650607765256	0.100856964519843	0.0636681222951117	0.130103373143979	0.0423790449114384
1088	8 vs. 49	2	0.9775	0.9702	0.1033	0.9333	0.375	2	0.98733412244898	0.985032326530612	0.0720954285714286	0.92485012244898	0.374998775510204	2	0.0100464514953486	0.0123890461273489	0.0270997599415362	0.0467822755882719	0.0481111504828868
1089	8 vs. 49	3	0.9614	0.9542	0.0852	0.8696	0.5208	3	0.755337551020408	0.757762775510204	0.185275510204082	0.653356163265306	0.506666612244898	3	0.215412445918853	0.212311770503312	0.0832591056930451	0.204524859292461	0.0496309945955463
1090	8 vs. 50	1	0.9268	0.9439	0.1229	0.7857	0.4167	1	0.89884612244898	0.903832	0.13500693877551	0.853011102040816	0.389999673469388	1	0.102650607765256	0.100856964519843	0.0636681222951117	0.130103373143979	0.0423790449114384
1091	8 vs. 50	2	0.9936	0.9943	0.0538	0.963	0.4375	2	0.98733412244898	0.985032326530612	0.0720954285714286	0.92485012244898	0.374998775510204	2	0.0100464514953486	0.0123890461273489	0.0270997599415362	0.0467822755882719	0.0481111504828868
1092	8 vs. 50	3	0.8259	0.8267	0.1718	0.6667	0.4375	3	0.755337551020408	0.757762775510204	0.185275510204082	0.653356163265306	0.506666612244898	3	0.215412445918853	0.212311770503312	0.0832591056930451	0.204524859292461	0.0496309945955463
1093	9 vs. 10	1	0.9535	0.9552	0.0973	0.8148	0.4375	1	0.89884612244898	0.903832	0.13500693877551	0.853011102040816	0.389999673469388	1	0.102650607765256	0.100856964519843	0.0636681222951117	0.130103373143979	0.0423790449114384
1094	9 vs. 10	2	0.9892	0.9847	0.0706	1	0.4583	2	0.98733412244898	0.985032326530612	0.0720954285714286	0.92485012244898	0.374998775510204	2	0.0100464514953486	0.0123890461273489	0.0270997599415362	0.0467822755882719	0.0481111504828868
1095	9 vs. 10	3	0.874	0.888	0.1422	0.8462	0.4583	3	0.755337551020408	0.757762775510204	0.185275510204082	0.653356163265306	0.506666612244898	3	0.215412445918853	0.212311770503312	0.0832591056930451	0.204524859292461	0.0496309945955463
1096	9 vs. 11	1	0.9015	0.902	0.1476	0.7857	0.4167	1	0.89884612244898	0.903832	0.13500693877551	0.853011102040816	0.389999673469388	1	0.102650607765256	0.100856964519843	0.0636681222951117	0.130103373143979	0.0423790449114384
1097	9 vs. 11	2	0.9891	0.9856	0.0706	0.963	0.4375	2	0.98733412244898	0.985032326530612	0.0720954285714286	0.92485012244898	0.374998775510204	2	0.0100464514953486	0.0123890461273489	0.0270997599415362	0.0467822755882719	0.0481111504828868
1098	9 vs. 11	3	0.6026	0.6225	0.2617	0.5185	0.4375	3	0.755337551020408	0.757762775510204	0.185275510204082	0.653356163265306	0.506666612244898	3	0.215412445918853	0.212311770503312	0.0832591056930451	0.204524859292461	0.0496309945955463
1099	9 vs. 12	1	0.7611	0.7679	0.2335	0.6667	0.4375	1	0.89884612244898	0.903832	0.13500693877551	0.853011102040816	0.389999673469388	1	0.102650607765256	0.100856964519843	0.0636681222951117	0.130103373143979	0.0423790449114384
1100	9 vs. 12	2	0.9746	0.9712	0.109	0.8667	0.375	2	0.98733412244898	0.985032326530612	0.0720954285714286	0.92485012244898	0.374998775510204	2	0.0100464514953486	0.0123890461273489	0.0270997599415362	0.0467822755882719	0.0481111504828868
1101	9 vs. 12	3	0.6857	0.6992	0.2331	0.5385	0.4583	3	0.755337551020408	0.757762775510204	0.185275510204082	0.653356163265306	0.506666612244898	3	0.215412445918853	0.212311770503312	0.0832591056930451	0.204524859292461	0.0496309945955463
1102	9 vs. 13	1	0.7406	0.7408	0.2264	0.7586	0.3958	1	0.89884612244898	0.903832	0.13500693877551	0.853011102040816	0.389999673469388	1	0.102650607765256	0.100856964519843	0.0636681222951117	0.130103373143979	0.0423790449114384
1103	9 vs. 13	2	0.9662	0.9572	0.1256	0.9231	0.4583	2	0.98733412244898	0.985032326530612	0.0720954285714286	0.92485012244898	0.374998775510204	2	0.0100464514953486	0.0123890461273489	0.0270997599415362	0.0467822755882719	0.0481111504828868
1104	9 vs. 13	3	0.2683	0.2599	0.3562	0.32	0.4792	3	0.755337551020408	0.757762775510204	0.185275510204082	0.653356163265306	0.506666612244898	3	0.215412445918853	0.212311770503312	0.0832591056930451	0.204524859292461	0.0496309945955463
1105	9 vs. 14	1	0.8305	0.8332	0.1924	0.7407	0.4375	1	0.89884612244898	0.903832	0.13500693877551	0.853011102040816	0.389999673469388	1	0.102650607765256	0.100856964519843	0.0636681222951117	0.130103373143979	0.0423790449114384
1106	9 vs. 14	2	0.9821	0.9758	0.0913	0.9286	0.4167	2	0.98733412244898	0.985032326530612	0.0720954285714286	0.92485012244898	0.374998775510204	2	0.0100464514953486	0.0123890461273489	0.0270997599415362	0.0467822755882719	0.0481111504828868
1107	9 vs. 14	3	0.7894	0.8401	0.1848	0.72	0.4792	3	0.755337551020408	0.757762775510204	0.185275510204082	0.653356163265306	0.506666612244898	3	0.215412445918853	0.212311770503312	0.0832591056930451	0.204524859292461	0.0496309945955463
1108	9 vs. 15	1	0.9041	0.9071	0.1432	0.7586	0.3958	1	0.89884612244898	0.903832	0.13500693877551	0.853011102040816	0.389999673469388	1	0.102650607765256	0.100856964519843	0.0636681222951117	0.130103373143979	0.0423790449114384
1109	9 vs. 15	2	0.9823	0.9763	0.0901	0.9286	0.4167	2	0.98733412244898	0.985032326530612	0.0720954285714286	0.92485012244898	0.374998775510204	2	0.0100464514953486	0.0123890461273489	0.0270997599415362	0.0467822755882719	0.0481111504828868
1110	9 vs. 15	3	0.7772	0.8165	0.1914	0.7692	0.4583	3	0.755337551020408	0.757762775510204	0.185275510204082	0.653356163265306	0.506666612244898	3	0.215412445918853	0.212311770503312	0.0832591056930451	0.204524859292461	0.0496309945955463
1111	9 vs. 16	1	0.958	0.9628	0.0954	0.9231	0.4583	1	0.89884612244898	0.903832	0.13500693877551	0.853011102040816	0.389999673469388	1	0.102650607765256	0.100856964519843	0.0636681222951117	0.130103373143979	0.0423790449114384
1112	9 vs. 16	2	0.9891	0.9859	0.0707	0.963	0.4375	2	0.98733412244898	0.985032326530612	0.0720954285714286	0.92485012244898	0.374998775510204	2	0.0100464514953486	0.0123890461273489	0.0270997599415362	0.0467822755882719	0.0481111504828868
1113	9 vs. 16	3	0.9465	0.9542	0.0919	0.8148	0.4375	3	0.755337551020408	0.757762775510204	0.185275510204082	0.653356163265306	0.506666612244898	3	0.215412445918853	0.212311770503312	0.0832591056930451	0.204524859292461	0.0496309945955463
1114	9 vs. 17	1	0.8161	0.8173	0.2004	0.7857	0.4167	1	0.89884612244898	0.903832	0.13500693877551	0.853011102040816	0.389999673469388	1	0.102650607765256	0.100856964519843	0.0636681222951117	0.130103373143979	0.0423790449114384
1115	9 vs. 17	2	0.9815	0.9746	0.0927	0.9286	0.4167	2	0.98733412244898	0.985032326530612	0.0720954285714286	0.92485012244898	0.374998775510204	2	0.0100464514953486	0.0123890461273489	0.0270997599415362	0.0467822755882719	0.0481111504828868
1116	9 vs. 17	3	0.3006	0.2925	0.3549	0.4167	0.5	3	0.755337551020408	0.757762775510204	0.185275510204082	0.653356163265306	0.506666612244898	3	0.215412445918853	0.212311770503312	0.0832591056930451	0.204524859292461	0.0496309945955463
1117	9 vs. 18	1	0.8973	0.8981	0.1508	0.8966	0.3958	1	0.89884612244898	0.903832	0.13500693877551	0.853011102040816	0.389999673469388	1	0.102650607765256	0.100856964519843	0.0636681222951117	0.130103373143979	0.0423790449114384
1118	9 vs. 18	2	0.9851	0.979	0.0829	0.9286	0.4167	2	0.98733412244898	0.985032326530612	0.0720954285714286	0.92485012244898	0.374998775510204	2	0.0100464514953486	0.0123890461273489	0.0270997599415362	0.0467822755882719	0.0481111504828868
1119	9 vs. 18	3	0.7194	0.7187	0.2077	0.6923	0.4583	3	0.755337551020408	0.757762775510204	0.185275510204082	0.653356163265306	0.506666612244898	3	0.215412445918853	0.212311770503312	0.0832591056930451	0.204524859292461	0.0496309945955463
1120	9 vs. 19	1	0.8851	0.8855	0.1558	0.8966	0.3958	1	0.89884612244898	0.903832	0.13500693877551	0.853011102040816	0.389999673469388	1	0.102650607765256	0.100856964519843	0.0636681222951117	0.130103373143979	0.0423790449114384
1121	9 vs. 19	2	0.9792	0.9718	0.0981	0.9286	0.4167	2	0.98733412244898	0.985032326530612	0.0720954285714286	0.92485012244898	0.374998775510204	2	0.0100464514953486	0.0123890461273489	0.0270997599415362	0.0467822755882719	0.0481111504828868
1122	9 vs. 19	3	0.7325	0.7548	0.2019	0.5926	0.4375	3	0.755337551020408	0.757762775510204	0.185275510204082	0.653356163265306	0.506666612244898	3	0.215412445918853	0.212311770503312	0.0832591056930451	0.204524859292461	0.0496309945955463
1123	9 vs. 20	1	0.8609	0.8612	0.17	0.72	0.4792	1	0.89884612244898	0.903832	0.13500693877551	0.853011102040816	0.389999673469388	1	0.102650607765256	0.100856964519843	0.0636681222951117	0.130103373143979	0.0423790449114384
1124	9 vs. 20	2	0.9871	0.9819	0.0767	1	0.4583	2	0.98733412244898	0.985032326530612	0.0720954285714286	0.92485012244898	0.374998775510204	2	0.0100464514953486	0.0123890461273489	0.0270997599415362	0.0467822755882719	0.0481111504828868
1125	9 vs. 20	3	0.5097	0.5085	0.285	0.4348	0.5208	3	0.755337551020408	0.757762775510204	0.185275510204082	0.653356163265306	0.506666612244898	3	0.215412445918853	0.212311770503312	0.0832591056930451	0.204524859292461	0.0496309945955463
1126	9 vs. 21	1	0.8262	0.8396	0.1947	0.7857	0.4167	1	0.89884612244898	0.903832	0.13500693877551	0.853011102040816	0.389999673469388	1	0.102650607765256	0.100856964519843	0.0636681222951117	0.130103373143979	0.0423790449114384
1127	9 vs. 21	2	0.9485	0.9442	0.1557	0.8125	0.3333	2	0.98733412244898	0.985032326530612	0.0720954285714286	0.92485012244898	0.374998775510204	2	0.0100464514953486	0.0123890461273489	0.0270997599415362	0.0467822755882719	0.0481111504828868
1128	9 vs. 21	3	0.9155	0.919	0.1132	0.88	0.4792	3	0.755337551020408	0.757762775510204	0.185275510204082	0.653356163265306	0.506666612244898	3	0.215412445918853	0.212311770503312	0.0832591056930451	0.204524859292461	0.0496309945955463
1129	9 vs. 22	1	0.8391	0.8389	0.1865	0.8148	0.4375	1	0.89884612244898	0.903832	0.13500693877551	0.853011102040816	0.389999673469388	1	0.102650607765256	0.100856964519843	0.0636681222951117	0.130103373143979	0.0423790449114384
1130	9 vs. 22	2	0.9854	0.9796	0.0818	0.8966	0.3958	2	0.98733412244898	0.985032326530612	0.0720954285714286	0.92485012244898	0.374998775510204	2	0.0100464514953486	0.0123890461273489	0.0270997599415362	0.0467822755882719	0.0481111504828868
1131	9 vs. 22	3	0.5461	0.5431	0.2693	0.5	0.5	3	0.755337551020408	0.757762775510204	0.185275510204082	0.653356163265306	0.506666612244898	3	0.215412445918853	0.212311770503312	0.0832591056930451	0.204524859292461	0.0496309945955463
1132	9 vs. 23	1	0.9126	0.913	0.1357	0.8	0.375	1	0.89884612244898	0.903832	0.13500693877551	0.853011102040816	0.389999673469388	1	0.102650607765256	0.100856964519843	0.0636681222951117	0.130103373143979	0.0423790449114384
1133	9 vs. 23	2	0.9849	0.9787	0.0834	1	0.4583	2	0.98733412244898	0.985032326530612	0.0720954285714286	0.92485012244898	0.374998775510204	2	0.0100464514953486	0.0123890461273489	0.0270997599415362	0.0467822755882719	0.0481111504828868
1134	9 vs. 23	3	0.6365	0.6554	0.2457	0.64	0.4792	3	0.755337551020408	0.757762775510204	0.185275510204082	0.653356163265306	0.506666612244898	3	0.215412445918853	0.212311770503312	0.0832591056930451	0.204524859292461	0.0496309945955463
1135	9 vs. 24	1	0.8308	0.8322	0.1982	0.7857	0.4167	1	0.89884612244898	0.903832	0.13500693877551	0.853011102040816	0.389999673469388	1	0.102650607765256	0.100856964519843	0.0636681222951117	0.130103373143979	0.0423790449114384
1136	9 vs. 24	2	0.9813	0.9744	0.0928	0.8966	0.3958	2	0.98733412244898	0.985032326530612	0.0720954285714286	0.92485012244898	0.374998775510204	2	0.0100464514953486	0.0123890461273489	0.0270997599415362	0.0467822755882719	0.0481111504828868
1137	9 vs. 24	3	0.3415	0.3385	0.3403	0.4167	0.5	3	0.755337551020408	0.757762775510204	0.185275510204082	0.653356163265306	0.506666612244898	3	0.215412445918853	0.212311770503312	0.0832591056930451	0.204524859292461	0.0496309945955463
1138	9 vs. 25	1	0.8031	0.8028	0.2084	0.7857	0.4167	1	0.89884612244898	0.903832	0.13500693877551	0.853011102040816	0.389999673469388	1	0.102650607765256	0.100856964519843	0.0636681222951117	0.130103373143979	0.0423790449114384
1139	9 vs. 25	2	0.9614	0.9531	0.1344	0.8966	0.3958	2	0.98733412244898	0.985032326530612	0.0720954285714286	0.92485012244898	0.374998775510204	2	0.0100464514953486	0.0123890461273489	0.0270997599415362	0.0467822755882719	0.0481111504828868
1140	9 vs. 25	3	0.8495	0.849	0.1508	0.7826	0.5208	3	0.755337551020408	0.757762775510204	0.185275510204082	0.653356163265306	0.506666612244898	3	0.215412445918853	0.212311770503312	0.0832591056930451	0.204524859292461	0.0496309945955463
1141	9 vs. 26	1	0.8892	0.8912	0.1584	0.7586	0.3958	1	0.89884612244898	0.903832	0.13500693877551	0.853011102040816	0.389999673469388	1	0.102650607765256	0.100856964519843	0.0636681222951117	0.130103373143979	0.0423790449114384
1142	9 vs. 26	2	0.9865	0.9822	0.079	0.963	0.4375	2	0.98733412244898	0.985032326530612	0.0720954285714286	0.92485012244898	0.374998775510204	2	0.0100464514953486	0.0123890461273489	0.0270997599415362	0.0467822755882719	0.0481111504828868
1143	9 vs. 26	3	0.6482	0.6714	0.2376	0.5833	0.5	3	0.755337551020408	0.757762775510204	0.185275510204082	0.653356163265306	0.506666612244898	3	0.215412445918853	0.212311770503312	0.0832591056930451	0.204524859292461	0.0496309945955463
1144	9 vs. 27	1	0.9169	0.9175	0.1334	0.8387	0.3542	1	0.89884612244898	0.903832	0.13500693877551	0.853011102040816	0.389999673469388	1	0.102650607765256	0.100856964519843	0.0636681222951117	0.130103373143979	0.0423790449114384
1145	9 vs. 27	2	0.9799	0.9723	0.0967	0.963	0.4375	2	0.98733412244898	0.985032326530612	0.0720954285714286	0.92485012244898	0.374998775510204	2	0.0100464514953486	0.0123890461273489	0.0270997599415362	0.0467822755882719	0.0481111504828868
1146	9 vs. 27	3	0.9597	0.9598	0.0791	0.8333	0.5	3	0.755337551020408	0.757762775510204	0.185275510204082	0.653356163265306	0.506666612244898	3	0.215412445918853	0.212311770503312	0.0832591056930451	0.204524859292461	0.0496309945955463
1147	9 vs. 28	1	0.925	0.9249	0.1286	0.8	0.4792	1	0.89884612244898	0.903832	0.13500693877551	0.853011102040816	0.389999673469388	1	0.102650607765256	0.100856964519843	0.0636681222951117	0.130103373143979	0.0423790449114384
1148	9 vs. 28	2	0.9849	0.9794	0.0841	0.9286	0.4167	2	0.98733412244898	0.985032326530612	0.0720954285714286	0.92485012244898	0.374998775510204	2	0.0100464514953486	0.0123890461273489	0.0270997599415362	0.0467822755882719	0.0481111504828868
1149	9 vs. 28	3	0.8891	0.8982	0.1346	0.8333	0.5	3	0.755337551020408	0.757762775510204	0.185275510204082	0.653356163265306	0.506666612244898	3	0.215412445918853	0.212311770503312	0.0832591056930451	0.204524859292461	0.0496309945955463
1150	9 vs. 29	1	0.9545	0.9549	0.0976	0.8889	0.4375	1	0.89884612244898	0.903832	0.13500693877551	0.853011102040816	0.389999673469388	1	0.102650607765256	0.100856964519843	0.0636681222951117	0.130103373143979	0.0423790449114384
1151	9 vs. 29	2	0.9968	0.9959	0.0386	1	0.4583	2	0.98733412244898	0.985032326530612	0.0720954285714286	0.92485012244898	0.374998775510204	2	0.0100464514953486	0.0123890461273489	0.0270997599415362	0.0467822755882719	0.0481111504828868
1152	9 vs. 29	3	0.7794	0.7954	0.1936	0.72	0.4792	3	0.755337551020408	0.757762775510204	0.185275510204082	0.653356163265306	0.506666612244898	3	0.215412445918853	0.212311770503312	0.0832591056930451	0.204524859292461	0.0496309945955463
1153	9 vs. 30	1	0.7713	0.781	0.2263	0.6667	0.4375	1	0.89884612244898	0.903832	0.13500693877551	0.853011102040816	0.389999673469388	1	0.102650607765256	0.100856964519843	0.0636681222951117	0.130103373143979	0.0423790449114384
1154	9 vs. 30	2	0.9697	0.9677	0.1194	0.8667	0.375	2	0.98733412244898	0.985032326530612	0.0720954285714286	0.92485012244898	0.374998775510204	2	0.0100464514953486	0.0123890461273489	0.0270997599415362	0.0467822755882719	0.0481111504828868
1155	9 vs. 30	3	0.0503	0.0338	0.3825	0	0.5417	3	0.755337551020408	0.757762775510204	0.185275510204082	0.653356163265306	0.506666612244898	3	0.215412445918853	0.212311770503312	0.0832591056930451	0.204524859292461	0.0496309945955463
1156	9 vs. 31	1	0.9085	0.9115	0.1388	0.8148	0.4375	1	0.89884612244898	0.903832	0.13500693877551	0.853011102040816	0.389999673469388	1	0.102650607765256	0.100856964519843	0.0636681222951117	0.130103373143979	0.0423790449114384
1157	9 vs. 31	2	0.9894	0.9879	0.0696	0.963	0.4375	2	0.98733412244898	0.985032326530612	0.0720954285714286	0.92485012244898	0.374998775510204	2	0.0100464514953486	0.0123890461273489	0.0270997599415362	0.0467822755882719	0.0481111504828868
1158	9 vs. 31	3	0.4581	0.4688	0.306	0.3846	0.4583	3	0.755337551020408	0.757762775510204	0.185275510204082	0.653356163265306	0.506666612244898	3	0.215412445918853	0.212311770503312	0.0832591056930451	0.204524859292461	0.0496309945955463
1159	9 vs. 32	1	0.7279	0.7378	0.2425	0.7407	0.4375	1	0.89884612244898	0.903832	0.13500693877551	0.853011102040816	0.389999673469388	1	0.102650607765256	0.100856964519843	0.0636681222951117	0.130103373143979	0.0423790449114384
1160	9 vs. 32	2	0.9741	0.9696	0.1101	0.8966	0.3958	2	0.98733412244898	0.985032326530612	0.0720954285714286	0.92485012244898	0.374998775510204	2	0.0100464514953486	0.0123890461273489	0.0270997599415362	0.0467822755882719	0.0481111504828868
1161	9 vs. 32	3	0.7555	0.7613	0.1964	0.64	0.4792	3	0.755337551020408	0.757762775510204	0.185275510204082	0.653356163265306	0.506666612244898	3	0.215412445918853	0.212311770503312	0.0832591056930451	0.204524859292461	0.0496309945955463
1162	9 vs. 33	1	0.9481	0.9542	0.1021	0.6667	0.5	1	0.89884612244898	0.903832	0.13500693877551	0.853011102040816	0.389999673469388	1	0.102650607765256	0.100856964519843	0.0636681222951117	0.130103373143979	0.0423790449114384
1163	9 vs. 33	2	0.9941	0.9921	0.052	1	0.4583	2	0.98733412244898	0.985032326530612	0.0720954285714286	0.92485012244898	0.374998775510204	2	0.0100464514953486	0.0123890461273489	0.0270997599415362	0.0467822755882719	0.0481111504828868
1164	9 vs. 33	3	0.9154	0.9224	0.1143	0.8	0.4792	3	0.755337551020408	0.757762775510204	0.185275510204082	0.653356163265306	0.506666612244898	3	0.215412445918853	0.212311770503312	0.0832591056930451	0.204524859292461	0.0496309945955463
1165	9 vs. 34	1	0.8074	0.8127	0.2066	0.8148	0.4375	1	0.89884612244898	0.903832	0.13500693877551	0.853011102040816	0.389999673469388	1	0.102650607765256	0.100856964519843	0.0636681222951117	0.130103373143979	0.0423790449114384
1166	9 vs. 34	2	0.9858	0.982	0.081	0.9286	0.4167	2	0.98733412244898	0.985032326530612	0.0720954285714286	0.92485012244898	0.374998775510204	2	0.0100464514953486	0.0123890461273489	0.0270997599415362	0.0467822755882719	0.0481111504828868
1167	9 vs. 34	3	0.7573	0.7813	0.1981	0.72	0.4792	3	0.755337551020408	0.757762775510204	0.185275510204082	0.653356163265306	0.506666612244898	3	0.215412445918853	0.212311770503312	0.0832591056930451	0.204524859292461	0.0496309945955463
1168	9 vs. 35	1	0.7844	0.7841	0.2187	0.8276	0.3958	1	0.89884612244898	0.903832	0.13500693877551	0.853011102040816	0.389999673469388	1	0.102650607765256	0.100856964519843	0.0636681222951117	0.130103373143979	0.0423790449114384
1169	9 vs. 35	2	0.97	0.9615	0.1192	0.8966	0.3958	2	0.98733412244898	0.985032326530612	0.0720954285714286	0.92485012244898	0.374998775510204	2	0.0100464514953486	0.0123890461273489	0.0270997599415362	0.0467822755882719	0.0481111504828868
1170	9 vs. 35	3	0.708	0.7116	0.2186	0.56	0.4792	3	0.755337551020408	0.757762775510204	0.185275510204082	0.653356163265306	0.506666612244898	3	0.215412445918853	0.212311770503312	0.0832591056930451	0.204524859292461	0.0496309945955463
1171	9 vs. 36	1	0.7897	0.7955	0.2167	0.7586	0.3958	1	0.89884612244898	0.903832	0.13500693877551	0.853011102040816	0.389999673469388	1	0.102650607765256	0.100856964519843	0.0636681222951117	0.130103373143979	0.0423790449114384
1172	9 vs. 36	2	0.9748	0.9703	0.1087	0.8387	0.3542	2	0.98733412244898	0.985032326530612	0.0720954285714286	0.92485012244898	0.374998775510204	2	0.0100464514953486	0.0123890461273489	0.0270997599415362	0.0467822755882719	0.0481111504828868
1173	9 vs. 36	3	0.3607	0.3593	0.3273	0.4348	0.5208	3	0.755337551020408	0.757762775510204	0.185275510204082	0.653356163265306	0.506666612244898	3	0.215412445918853	0.212311770503312	0.0832591056930451	0.204524859292461	0.0496309945955463
1174	9 vs. 37	1	0.954	0.9552	0.0997	0.8966	0.3958	1	0.89884612244898	0.903832	0.13500693877551	0.853011102040816	0.389999673469388	1	0.102650607765256	0.100856964519843	0.0636681222951117	0.130103373143979	0.0423790449114384
1175	9 vs. 37	2	0.9902	0.9864	0.0671	1	0.4583	2	0.98733412244898	0.985032326530612	0.0720954285714286	0.92485012244898	0.374998775510204	2	0.0100464514953486	0.0123890461273489	0.0270997599415362	0.0467822755882719	0.0481111504828868
1176	9 vs. 37	3	0.8718	0.8916	0.1432	0.8462	0.4583	3	0.755337551020408	0.757762775510204	0.185275510204082	0.653356163265306	0.506666612244898	3	0.215412445918853	0.212311770503312	0.0832591056930451	0.204524859292461	0.0496309945955463
1177	9 vs. 38	1	0.8945	0.8955	0.1515	0.7857	0.4167	1	0.89884612244898	0.903832	0.13500693877551	0.853011102040816	0.389999673469388	1	0.102650607765256	0.100856964519843	0.0636681222951117	0.130103373143979	0.0423790449114384
1178	9 vs. 38	2	0.9805	0.9771	0.0959	0.8667	0.375	2	0.98733412244898	0.985032326530612	0.0720954285714286	0.92485012244898	0.374998775510204	2	0.0100464514953486	0.0123890461273489	0.0270997599415362	0.0467822755882719	0.0481111504828868
1179	9 vs. 38	3	0.8265	0.8255	0.1636	0.7826	0.5208	3	0.755337551020408	0.757762775510204	0.185275510204082	0.653356163265306	0.506666612244898	3	0.215412445918853	0.212311770503312	0.0832591056930451	0.204524859292461	0.0496309945955463
1180	9 vs. 39	1	0.8292	0.8289	0.1907	0.7857	0.4167	1	0.89884612244898	0.903832	0.13500693877551	0.853011102040816	0.389999673469388	1	0.102650607765256	0.100856964519843	0.0636681222951117	0.130103373143979	0.0423790449114384
1181	9 vs. 39	2	0.9794	0.973	0.0986	0.8966	0.3958	2	0.98733412244898	0.985032326530612	0.0720954285714286	0.92485012244898	0.374998775510204	2	0.0100464514953486	0.0123890461273489	0.0270997599415362	0.0467822755882719	0.0481111504828868
1182	9 vs. 39	3	0.0273	0.0706	0.4185	0.1667	0.5	3	0.755337551020408	0.757762775510204	0.185275510204082	0.653356163265306	0.506666612244898	3	0.215412445918853	0.212311770503312	0.0832591056930451	0.204524859292461	0.0496309945955463
1183	9 vs. 40	1	0.7124	0.7293	0.2555	0.7143	0.4167	1	0.89884612244898	0.903832	0.13500693877551	0.853011102040816	0.389999673469388	1	0.102650607765256	0.100856964519843	0.0636681222951117	0.130103373143979	0.0423790449114384
1184	9 vs. 40	2	0.9589	0.9533	0.1391	0.8387	0.3542	2	0.98733412244898	0.985032326530612	0.0720954285714286	0.92485012244898	0.374998775510204	2	0.0100464514953486	0.0123890461273489	0.0270997599415362	0.0467822755882719	0.0481111504828868
1185	9 vs. 40	3	0.5784	0.5917	0.2696	0.5	0.5	3	0.755337551020408	0.757762775510204	0.185275510204082	0.653356163265306	0.506666612244898	3	0.215412445918853	0.212311770503312	0.0832591056930451	0.204524859292461	0.0496309945955463
1186	9 vs. 41	1	0.7926	0.7979	0.2153	0.7857	0.4167	1	0.89884612244898	0.903832	0.13500693877551	0.853011102040816	0.389999673469388	1	0.102650607765256	0.100856964519843	0.0636681222951117	0.130103373143979	0.0423790449114384
1187	9 vs. 41	2	0.9735	0.9678	0.1112	0.9286	0.4167	2	0.98733412244898	0.985032326530612	0.0720954285714286	0.92485012244898	0.374998775510204	2	0.0100464514953486	0.0123890461273489	0.0270997599415362	0.0467822755882719	0.0481111504828868
1188	9 vs. 41	3	0.6323	0.6433	0.2489	0.4444	0.4375	3	0.755337551020408	0.757762775510204	0.185275510204082	0.653356163265306	0.506666612244898	3	0.215412445918853	0.212311770503312	0.0832591056930451	0.204524859292461	0.0496309945955463
1189	9 vs. 42	1	0.9361	0.9368	0.1163	0.8462	0.4583	1	0.89884612244898	0.903832	0.13500693877551	0.853011102040816	0.389999673469388	1	0.102650607765256	0.100856964519843	0.0636681222951117	0.130103373143979	0.0423790449114384
1190	9 vs. 42	2	0.9914	0.9883	0.0627	0.963	0.4375	2	0.98733412244898	0.985032326530612	0.0720954285714286	0.92485012244898	0.374998775510204	2	0.0100464514953486	0.0123890461273489	0.0270997599415362	0.0467822755882719	0.0481111504828868
1191	9 vs. 42	3	0.61	0.6143	0.2464	0.5	0.5	3	0.755337551020408	0.757762775510204	0.185275510204082	0.653356163265306	0.506666612244898	3	0.215412445918853	0.212311770503312	0.0832591056930451	0.204524859292461	0.0496309945955463
1192	9 vs. 43	1	0.859	0.8588	0.1755	0.8148	0.4375	1	0.89884612244898	0.903832	0.13500693877551	0.853011102040816	0.389999673469388	1	0.102650607765256	0.100856964519843	0.0636681222951117	0.130103373143979	0.0423790449114384
1193	9 vs. 43	2	0.9657	0.955	0.1276	0.8966	0.3958	2	0.98733412244898	0.985032326530612	0.0720954285714286	0.92485012244898	0.374998775510204	2	0.0100464514953486	0.0123890461273489	0.0270997599415362	0.0467822755882719	0.0481111504828868
1194	9 vs. 43	3	0.5912	0.6119	0.2614	0.6154	0.4583	3	0.755337551020408	0.757762775510204	0.185275510204082	0.653356163265306	0.506666612244898	3	0.215412445918853	0.212311770503312	0.0832591056930451	0.204524859292461	0.0496309945955463
1195	9 vs. 44	1	0.9143	0.9147	0.1293	0.6667	0.5	1	0.89884612244898	0.903832	0.13500693877551	0.853011102040816	0.389999673469388	1	0.102650607765256	0.100856964519843	0.0636681222951117	0.130103373143979	0.0423790449114384
1196	9 vs. 44	2	0.9954	0.9938	0.0465	1	0.4583	2	0.98733412244898	0.985032326530612	0.0720954285714286	0.92485012244898	0.374998775510204	2	0.0100464514953486	0.0123890461273489	0.0270997599415362	0.0467822755882719	0.0481111504828868
1197	9 vs. 44	3	0.6052	0.616	0.254	0.5926	0.4375	3	0.755337551020408	0.757762775510204	0.185275510204082	0.653356163265306	0.506666612244898	3	0.215412445918853	0.212311770503312	0.0832591056930451	0.204524859292461	0.0496309945955463
1198	9 vs. 45	1	0.8029	0.8094	0.2113	0.7857	0.4167	1	0.89884612244898	0.903832	0.13500693877551	0.853011102040816	0.389999673469388	1	0.102650607765256	0.100856964519843	0.0636681222951117	0.130103373143979	0.0423790449114384
1199	9 vs. 45	2	0.9716	0.965	0.1152	0.8667	0.375	2	0.98733412244898	0.985032326530612	0.0720954285714286	0.92485012244898	0.374998775510204	2	0.0100464514953486	0.0123890461273489	0.0270997599415362	0.0467822755882719	0.0481111504828868
1200	9 vs. 45	3	0.3547	0.3751	0.3399	0.5217	0.5208	3	0.755337551020408	0.757762775510204	0.185275510204082	0.653356163265306	0.506666612244898	3	0.215412445918853	0.212311770503312	0.0832591056930451	0.204524859292461	0.0496309945955463
1201	9 vs. 46	1	0.9839	0.9845	0.0576	0.9286	0.4167	1	0.89884612244898	0.903832	0.13500693877551	0.853011102040816	0.389999673469388	1	0.102650607765256	0.100856964519843	0.0636681222951117	0.130103373143979	0.0423790449114384
1202	9 vs. 46	2	0.9963	0.9956	0.0417	0.9286	0.4167	2	0.98733412244898	0.985032326530612	0.0720954285714286	0.92485012244898	0.374998775510204	2	0.0100464514953486	0.0123890461273489	0.0270997599415362	0.0467822755882719	0.0481111504828868
1203	9 vs. 46	3	0.8817	0.8971	0.1343	0.5455	0.5417	3	0.755337551020408	0.757762775510204	0.185275510204082	0.653356163265306	0.506666612244898	3	0.215412445918853	0.212311770503312	0.0832591056930451	0.204524859292461	0.0496309945955463
1204	9 vs. 47	1	0.8322	0.832	0.193	0.8	0.375	1	0.89884612244898	0.903832	0.13500693877551	0.853011102040816	0.389999673469388	1	0.102650607765256	0.100856964519843	0.0636681222951117	0.130103373143979	0.0423790449114384
1205	9 vs. 47	2	0.9726	0.9641	0.1133	0.8966	0.3958	2	0.98733412244898	0.985032326530612	0.0720954285714286	0.92485012244898	0.374998775510204	2	0.0100464514953486	0.0123890461273489	0.0270997599415362	0.0467822755882719	0.0481111504828868
1206	9 vs. 47	3	0.5369	0.5589	0.2797	0.48	0.4792	3	0.755337551020408	0.757762775510204	0.185275510204082	0.653356163265306	0.506666612244898	3	0.215412445918853	0.212311770503312	0.0832591056930451	0.204524859292461	0.0496309945955463
1207	9 vs. 48	1	0.8801	0.8808	0.1561	0.7586	0.3958	1	0.89884612244898	0.903832	0.13500693877551	0.853011102040816	0.389999673469388	1	0.102650607765256	0.100856964519843	0.0636681222951117	0.130103373143979	0.0423790449114384
1208	9 vs. 48	2	0.9824	0.9765	0.0894	1	0.4583	2	0.98733412244898	0.985032326530612	0.0720954285714286	0.92485012244898	0.374998775510204	2	0.0100464514953486	0.0123890461273489	0.0270997599415362	0.0467822755882719	0.0481111504828868
1209	9 vs. 48	3	0.5169	0.5173	0.2705	0.3	0.5833	3	0.755337551020408	0.757762775510204	0.185275510204082	0.653356163265306	0.506666612244898	3	0.215412445918853	0.212311770503312	0.0832591056930451	0.204524859292461	0.0496309945955463
1210	9 vs. 49	1	0.7733	0.7768	0.229	0.7857	0.4167	1	0.89884612244898	0.903832	0.13500693877551	0.853011102040816	0.389999673469388	1	0.102650607765256	0.100856964519843	0.0636681222951117	0.130103373143979	0.0423790449114384
1211	9 vs. 49	2	0.9728	0.9651	0.1133	0.8966	0.3958	2	0.98733412244898	0.985032326530612	0.0720954285714286	0.92485012244898	0.374998775510204	2	0.0100464514953486	0.0123890461273489	0.0270997599415362	0.0467822755882719	0.0481111504828868
1212	9 vs. 49	3	0.5169	0.5427	0.2915	0.5833	0.5	3	0.755337551020408	0.757762775510204	0.185275510204082	0.653356163265306	0.506666612244898	3	0.215412445918853	0.212311770503312	0.0832591056930451	0.204524859292461	0.0496309945955463
1213	9 vs. 50	1	0.9423	0.9491	0.1101	0.7857	0.4167	1	0.89884612244898	0.903832	0.13500693877551	0.853011102040816	0.389999673469388	1	0.102650607765256	0.100856964519843	0.0636681222951117	0.130103373143979	0.0423790449114384
1214	9 vs. 50	2	0.9952	0.9934	0.0471	1	0.4583	2	0.98733412244898	0.985032326530612	0.0720954285714286	0.92485012244898	0.374998775510204	2	0.0100464514953486	0.0123890461273489	0.0270997599415362	0.0467822755882719	0.0481111504828868
1215	9 vs. 50	3	0.786	0.79	0.1862	0.6429	0.4167	3	0.755337551020408	0.757762775510204	0.185275510204082	0.653356163265306	0.506666612244898	3	0.215412445918853	0.212311770503312	0.0832591056930451	0.204524859292461	0.0496309945955463
1216	10 vs. 11	1	0.9415	0.9463	0.1146	0.8276	0.3958	1	0.89884612244898	0.903832	0.13500693877551	0.853011102040816	0.389999673469388	1	0.102650607765256	0.100856964519843	0.0636681222951117	0.130103373143979	0.0423790449114384
1217	10 vs. 11	2	0.9974	0.9972	0.0347	0.963	0.4375	2	0.98733412244898	0.985032326530612	0.0720954285714286	0.92485012244898	0.374998775510204	2	0.0100464514953486	0.0123890461273489	0.0270997599415362	0.0467822755882719	0.0481111504828868
1218	10 vs. 11	3	0.8504	0.8402	0.1621	0.6667	0.4375	3	0.755337551020408	0.757762775510204	0.185275510204082	0.653356163265306	0.506666612244898	3	0.215412445918853	0.212311770503312	0.0832591056930451	0.204524859292461	0.0496309945955463
1219	10 vs. 12	1	0.7968	0.815	0.2158	0.7143	0.4167	1	0.89884612244898	0.903832	0.13500693877551	0.853011102040816	0.389999673469388	1	0.102650607765256	0.100856964519843	0.0636681222951117	0.130103373143979	0.0423790449114384
1220	10 vs. 12	2	0.988	0.9893	0.075	0.8667	0.375	2	0.98733412244898	0.985032326530612	0.0720954285714286	0.92485012244898	0.374998775510204	2	0.0100464514953486	0.0123890461273489	0.0270997599415362	0.0467822755882719	0.0481111504828868
1221	10 vs. 12	3	0.9233	0.9173	0.1169	0.7692	0.4583	3	0.755337551020408	0.757762775510204	0.185275510204082	0.653356163265306	0.506666612244898	3	0.215412445918853	0.212311770503312	0.0832591056930451	0.204524859292461	0.0496309945955463
1222	10 vs. 13	1	0.8766	0.8827	0.1564	0.8667	0.375	1	0.89884612244898	0.903832	0.13500693877551	0.853011102040816	0.389999673469388	1	0.102650607765256	0.100856964519843	0.0636681222951117	0.130103373143979	0.0423790449114384
1223	10 vs. 13	2	0.9894	0.9887	0.0706	0.9231	0.4583	2	0.98733412244898	0.985032326530612	0.0720954285714286	0.92485012244898	0.374998775510204	2	0.0100464514953486	0.0123890461273489	0.0270997599415362	0.0467822755882719	0.0481111504828868
1224	10 vs. 13	3	0.6705	0.6379	0.2408	0.4	0.4792	3	0.755337551020408	0.757762775510204	0.185275510204082	0.653356163265306	0.506666612244898	3	0.215412445918853	0.212311770503312	0.0832591056930451	0.204524859292461	0.0496309945955463
1225	10 vs. 14	1	0.8756	0.8859	0.1652	0.7857	0.4167	1	0.89884612244898	0.903832	0.13500693877551	0.853011102040816	0.389999673469388	1	0.102650607765256	0.100856964519843	0.0636681222951117	0.130103373143979	0.0423790449114384
1226	10 vs. 14	2	0.9939	0.9922	0.0535	0.9286	0.4167	2	0.98733412244898	0.985032326530612	0.0720954285714286	0.92485012244898	0.374998775510204	2	0.0100464514953486	0.0123890461273489	0.0270997599415362	0.0467822755882719	0.0481111504828868
1227	10 vs. 14	3	0.9526	0.963	0.0882	0.8	0.4792	3	0.755337551020408	0.757762775510204	0.185275510204082	0.653356163265306	0.506666612244898	3	0.215412445918853	0.212311770503312	0.0832591056930451	0.204524859292461	0.0496309945955463
1228	10 vs. 15	1	0.93	0.9401	0.1227	0.8	0.375	1	0.89884612244898	0.903832	0.13500693877551	0.853011102040816	0.389999673469388	1	0.102650607765256	0.100856964519843	0.0636681222951117	0.130103373143979	0.0423790449114384
1229	10 vs. 15	2	0.9973	0.997	0.0356	0.9286	0.4167	2	0.98733412244898	0.985032326530612	0.0720954285714286	0.92485012244898	0.374998775510204	2	0.0100464514953486	0.0123890461273489	0.0270997599415362	0.0467822755882719	0.0481111504828868
1230	10 vs. 15	3	0.963	0.9693	0.0787	0.9231	0.4583	3	0.755337551020408	0.757762775510204	0.185275510204082	0.653356163265306	0.506666612244898	3	0.215412445918853	0.212311770503312	0.0832591056930451	0.204524859292461	0.0496309945955463
1231	10 vs. 16	1	0.9744	0.9752	0.075	0.8148	0.4375	1	0.89884612244898	0.903832	0.13500693877551	0.853011102040816	0.389999673469388	1	0.102650607765256	0.100856964519843	0.0636681222951117	0.130103373143979	0.0423790449114384
1232	10 vs. 16	2	0.9954	0.995	0.046	0.963	0.4375	2	0.98733412244898	0.985032326530612	0.0720954285714286	0.92485012244898	0.374998775510204	2	0.0100464514953486	0.0123890461273489	0.0270997599415362	0.0467822755882719	0.0481111504828868
1233	10 vs. 16	3	0.7724	0.8155	0.1907	0.8148	0.4375	3	0.755337551020408	0.757762775510204	0.185275510204082	0.653356163265306	0.506666612244898	3	0.215412445918853	0.212311770503312	0.0832591056930451	0.204524859292461	0.0496309945955463
1234	10 vs. 17	1	0.8785	0.886	0.1634	0.8276	0.3958	1	0.89884612244898	0.903832	0.13500693877551	0.853011102040816	0.389999673469388	1	0.102650607765256	0.100856964519843	0.0636681222951117	0.130103373143979	0.0423790449114384
1235	10 vs. 17	2	0.9937	0.9917	0.0542	0.9286	0.4167	2	0.98733412244898	0.985032326530612	0.0720954285714286	0.92485012244898	0.374998775510204	2	0.0100464514953486	0.0123890461273489	0.0270997599415362	0.0467822755882719	0.0481111504828868
1236	10 vs. 17	3	0.6691	0.6347	0.2464	0.5833	0.5	3	0.755337551020408	0.757762775510204	0.185275510204082	0.653356163265306	0.506666612244898	3	0.215412445918853	0.212311770503312	0.0832591056930451	0.204524859292461	0.0496309945955463
1237	10 vs. 18	1	0.95	0.9501	0.1063	0.9333	0.375	1	0.89884612244898	0.903832	0.13500693877551	0.853011102040816	0.389999673469388	1	0.102650607765256	0.100856964519843	0.0636681222951117	0.130103373143979	0.0423790449114384
1238	10 vs. 18	2	0.9965	0.9952	0.0401	0.9286	0.4167	2	0.98733412244898	0.985032326530612	0.0720954285714286	0.92485012244898	0.374998775510204	2	0.0100464514953486	0.0123890461273489	0.0270997599415362	0.0467822755882719	0.0481111504828868
1239	10 vs. 18	3	0.8488	0.8448	0.1537	0.7692	0.4583	3	0.755337551020408	0.757762775510204	0.185275510204082	0.653356163265306	0.506666612244898	3	0.215412445918853	0.212311770503312	0.0832591056930451	0.204524859292461	0.0496309945955463
1240	10 vs. 19	1	0.9187	0.9234	0.1312	0.9333	0.375	1	0.89884612244898	0.903832	0.13500693877551	0.853011102040816	0.389999673469388	1	0.102650607765256	0.100856964519843	0.0636681222951117	0.130103373143979	0.0423790449114384
1241	10 vs. 19	2	0.9952	0.994	0.0472	0.9286	0.4167	2	0.98733412244898	0.985032326530612	0.0720954285714286	0.92485012244898	0.374998775510204	2	0.0100464514953486	0.0123890461273489	0.0270997599415362	0.0467822755882719	0.0481111504828868
1242	10 vs. 19	3	0.9241	0.9198	0.109	0.7407	0.4375	3	0.755337551020408	0.757762775510204	0.185275510204082	0.653356163265306	0.506666612244898	3	0.215412445918853	0.212311770503312	0.0832591056930451	0.204524859292461	0.0496309945955463
1243	10 vs. 20	1	0.9319	0.9323	0.1191	0.9231	0.4583	1	0.89884612244898	0.903832	0.13500693877551	0.853011102040816	0.389999673469388	1	0.102650607765256	0.100856964519843	0.0636681222951117	0.130103373143979	0.0423790449114384
1244	10 vs. 20	2	0.9959	0.9944	0.0435	1	0.4583	2	0.98733412244898	0.985032326530612	0.0720954285714286	0.92485012244898	0.374998775510204	2	0.0100464514953486	0.0123890461273489	0.0270997599415362	0.0467822755882719	0.0481111504828868
1245	10 vs. 20	3	0.7896	0.7719	0.1879	0.6087	0.5208	3	0.755337551020408	0.757762775510204	0.185275510204082	0.653356163265306	0.506666612244898	3	0.215412445918853	0.212311770503312	0.0832591056930451	0.204524859292461	0.0496309945955463
1246	10 vs. 21	1	0.832	0.8586	0.1916	0.8276	0.3958	1	0.89884612244898	0.903832	0.13500693877551	0.853011102040816	0.389999673469388	1	0.102650607765256	0.100856964519843	0.0636681222951117	0.130103373143979	0.0423790449114384
1247	10 vs. 21	2	0.9745	0.9784	0.1101	0.8125	0.3333	2	0.98733412244898	0.985032326530612	0.0720954285714286	0.92485012244898	0.374998775510204	2	0.0100464514953486	0.0123890461273489	0.0270997599415362	0.0467822755882719	0.0481111504828868
1248	10 vs. 21	3	0.7737	0.8051	0.1838	0.72	0.4792	3	0.755337551020408	0.757762775510204	0.185275510204082	0.653356163265306	0.506666612244898	3	0.215412445918853	0.212311770503312	0.0832591056930451	0.204524859292461	0.0496309945955463
1249	10 vs. 22	1	0.8953	0.8966	0.1509	0.8571	0.4167	1	0.89884612244898	0.903832	0.13500693877551	0.853011102040816	0.389999673469388	1	0.102650607765256	0.100856964519843	0.0636681222951117	0.130103373143979	0.0423790449114384
1250	10 vs. 22	2	0.9954	0.9935	0.0463	0.8966	0.3958	2	0.98733412244898	0.985032326530612	0.0720954285714286	0.92485012244898	0.374998775510204	2	0.0100464514953486	0.0123890461273489	0.0270997599415362	0.0467822755882719	0.0481111504828868
1251	10 vs. 22	3	0.8052	0.7932	0.1775	0.6667	0.5	3	0.755337551020408	0.757762775510204	0.185275510204082	0.653356163265306	0.506666612244898	3	0.215412445918853	0.212311770503312	0.0832591056930451	0.204524859292461	0.0496309945955463
1252	10 vs. 23	1	0.9636	0.9684	0.0879	0.8387	0.3542	1	0.89884612244898	0.903832	0.13500693877551	0.853011102040816	0.389999673469388	1	0.102650607765256	0.100856964519843	0.0636681222951117	0.130103373143979	0.0423790449114384
1253	10 vs. 23	2	0.9978	0.9969	0.0321	1	0.4583	2	0.98733412244898	0.985032326530612	0.0720954285714286	0.92485012244898	0.374998775510204	2	0.0100464514953486	0.0123890461273489	0.0270997599415362	0.0467822755882719	0.0481111504828868
1254	10 vs. 23	3	0.9106	0.9064	0.1228	0.8	0.4792	3	0.755337551020408	0.757762775510204	0.185275510204082	0.653356163265306	0.506666612244898	3	0.215412445918853	0.212311770503312	0.0832591056930451	0.204524859292461	0.0496309945955463
1255	10 vs. 24	1	0.8701	0.878	0.1744	0.8276	0.3958	1	0.89884612244898	0.903832	0.13500693877551	0.853011102040816	0.389999673469388	1	0.102650607765256	0.100856964519843	0.0636681222951117	0.130103373143979	0.0423790449114384
1256	10 vs. 24	2	0.9948	0.9931	0.0492	0.8966	0.3958	2	0.98733412244898	0.985032326530612	0.0720954285714286	0.92485012244898	0.374998775510204	2	0.0100464514953486	0.0123890461273489	0.0270997599415362	0.0467822755882719	0.0481111504828868
1257	10 vs. 24	3	0.7047	0.6756	0.2298	0.5833	0.5	3	0.755337551020408	0.757762775510204	0.185275510204082	0.653356163265306	0.506666612244898	3	0.215412445918853	0.212311770503312	0.0832591056930451	0.204524859292461	0.0496309945955463
1258	10 vs. 25	1	0.8699	0.8729	0.17	0.8276	0.3958	1	0.89884612244898	0.903832	0.13500693877551	0.853011102040816	0.389999673469388	1	0.102650607765256	0.100856964519843	0.0636681222951117	0.130103373143979	0.0423790449114384
1259	10 vs. 25	2	0.9855	0.9855	0.0827	0.8966	0.3958	2	0.98733412244898	0.985032326530612	0.0720954285714286	0.92485012244898	0.374998775510204	2	0.0100464514953486	0.0123890461273489	0.0270997599415362	0.0467822755882719	0.0481111504828868
1260	10 vs. 25	3	0.9199	0.941	0.1117	0.8696	0.5208	3	0.755337551020408	0.757762775510204	0.185275510204082	0.653356163265306	0.506666612244898	3	0.215412445918853	0.212311770503312	0.0832591056930451	0.204524859292461	0.0496309945955463
1261	10 vs. 26	1	0.9253	0.9338	0.1309	0.8	0.375	1	0.89884612244898	0.903832	0.13500693877551	0.853011102040816	0.389999673469388	1	0.102650607765256	0.100856964519843	0.0636681222951117	0.130103373143979	0.0423790449114384
1262	10 vs. 26	2	0.9972	0.997	0.0361	0.963	0.4375	2	0.98733412244898	0.985032326530612	0.0720954285714286	0.92485012244898	0.374998775510204	2	0.0100464514953486	0.0123890461273489	0.0270997599415362	0.0467822755882719	0.0481111504828868
1263	10 vs. 26	3	0.9216	0.9204	0.1128	0.75	0.5	3	0.755337551020408	0.757762775510204	0.185275510204082	0.653356163265306	0.506666612244898	3	0.215412445918853	0.212311770503312	0.0832591056930451	0.204524859292461	0.0496309945955463
1264	10 vs. 27	1	0.9648	0.965	0.0874	0.875	0.3333	1	0.89884612244898	0.903832	0.13500693877551	0.853011102040816	0.389999673469388	1	0.102650607765256	0.100856964519843	0.0636681222951117	0.130103373143979	0.0423790449114384
1265	10 vs. 27	2	0.9936	0.9914	0.0549	0.963	0.4375	2	0.98733412244898	0.985032326530612	0.0720954285714286	0.92485012244898	0.374998775510204	2	0.0100464514953486	0.0123890461273489	0.0270997599415362	0.0467822755882719	0.0481111504828868
1266	10 vs. 27	3	0.856	0.8747	0.1493	0.8333	0.5	3	0.755337551020408	0.757762775510204	0.185275510204082	0.653356163265306	0.506666612244898	3	0.215412445918853	0.212311770503312	0.0832591056930451	0.204524859292461	0.0496309945955463
1267	10 vs. 28	1	0.922	0.9243	0.1311	0.7692	0.4583	1	0.89884612244898	0.903832	0.13500693877551	0.853011102040816	0.389999673469388	1	0.102650607765256	0.100856964519843	0.0636681222951117	0.130103373143979	0.0423790449114384
1268	10 vs. 28	2	0.992	0.9892	0.0615	0.9286	0.4167	2	0.98733412244898	0.985032326530612	0.0720954285714286	0.92485012244898	0.374998775510204	2	0.0100464514953486	0.0123890461273489	0.0270997599415362	0.0467822755882719	0.0481111504828868
1269	10 vs. 28	3	0.9632	0.9613	0.078	0.9167	0.5	3	0.755337551020408	0.757762775510204	0.185275510204082	0.653356163265306	0.506666612244898	3	0.215412445918853	0.212311770503312	0.0832591056930451	0.204524859292461	0.0496309945955463
1270	10 vs. 29	1	0.9727	0.973	0.0758	0.8571	0.4167	1	0.89884612244898	0.903832	0.13500693877551	0.853011102040816	0.389999673469388	1	0.102650607765256	0.100856964519843	0.0636681222951117	0.130103373143979	0.0423790449114384
1271	10 vs. 29	2	0.9907	0.9871	0.0655	1	0.4583	2	0.98733412244898	0.985032326530612	0.0720954285714286	0.92485012244898	0.374998775510204	2	0.0100464514953486	0.0123890461273489	0.0270997599415362	0.0467822755882719	0.0481111504828868
1272	10 vs. 29	3	0.9671	0.9648	0.0763	0.88	0.4792	3	0.755337551020408	0.757762775510204	0.185275510204082	0.653356163265306	0.506666612244898	3	0.215412445918853	0.212311770503312	0.0832591056930451	0.204524859292461	0.0496309945955463
1273	10 vs. 30	1	0.788	0.8102	0.2181	0.7143	0.4167	1	0.89884612244898	0.903832	0.13500693877551	0.853011102040816	0.389999673469388	1	0.102650607765256	0.100856964519843	0.0636681222951117	0.130103373143979	0.0423790449114384
1274	10 vs. 30	2	0.984	0.9868	0.087	0.8667	0.375	2	0.98733412244898	0.985032326530612	0.0720954285714286	0.92485012244898	0.374998775510204	2	0.0100464514953486	0.0123890461273489	0.0270997599415362	0.0467822755882719	0.0481111504828868
1275	10 vs. 30	3	0.3888	0.3532	0.3088	0.1818	0.5417	3	0.755337551020408	0.757762775510204	0.185275510204082	0.653356163265306	0.506666612244898	3	0.215412445918853	0.212311770503312	0.0832591056930451	0.204524859292461	0.0496309945955463
1276	10 vs. 31	1	0.9242	0.9343	0.1265	0.8571	0.4167	1	0.89884612244898	0.903832	0.13500693877551	0.853011102040816	0.389999673469388	1	0.102650607765256	0.100856964519843	0.0636681222951117	0.130103373143979	0.0423790449114384
1277	10 vs. 31	2	0.9952	0.9958	0.0472	0.963	0.4375	2	0.98733412244898	0.985032326530612	0.0720954285714286	0.92485012244898	0.374998775510204	2	0.0100464514953486	0.0123890461273489	0.0270997599415362	0.0467822755882719	0.0481111504828868
1278	10 vs. 31	3	0.7933	0.7779	0.1906	0.5385	0.4583	3	0.755337551020408	0.757762775510204	0.185275510204082	0.653356163265306	0.506666612244898	3	0.215412445918853	0.212311770503312	0.0832591056930451	0.204524859292461	0.0496309945955463
1279	10 vs. 32	1	0.7597	0.7832	0.2281	0.7857	0.4167	1	0.89884612244898	0.903832	0.13500693877551	0.853011102040816	0.389999673469388	1	0.102650607765256	0.100856964519843	0.0636681222951117	0.130103373143979	0.0423790449114384
1280	10 vs. 32	2	0.9869	0.987	0.0783	0.8966	0.3958	2	0.98733412244898	0.985032326530612	0.0720954285714286	0.92485012244898	0.374998775510204	2	0.0100464514953486	0.0123890461273489	0.0270997599415362	0.0467822755882719	0.0481111504828868
1281	10 vs. 32	3	0.9475	0.9439	0.0917	0.8	0.4792	3	0.755337551020408	0.757762775510204	0.185275510204082	0.653356163265306	0.506666612244898	3	0.215412445918853	0.212311770503312	0.0832591056930451	0.204524859292461	0.0496309945955463
1282	10 vs. 33	1	0.915	0.9162	0.1308	0.72	0.4792	1	0.89884612244898	0.903832	0.13500693877551	0.853011102040816	0.389999673469388	1	0.102650607765256	0.100856964519843	0.0636681222951117	0.130103373143979	0.0423790449114384
1283	10 vs. 33	2	0.9926	0.9899	0.0583	1	0.4583	2	0.98733412244898	0.985032326530612	0.0720954285714286	0.92485012244898	0.374998775510204	2	0.0100464514953486	0.0123890461273489	0.0270997599415362	0.0467822755882719	0.0481111504828868
1284	10 vs. 33	3	0.9564	0.9554	0.0832	0.8	0.4792	3	0.755337551020408	0.757762775510204	0.185275510204082	0.653356163265306	0.506666612244898	3	0.215412445918853	0.212311770503312	0.0832591056930451	0.204524859292461	0.0496309945955463
1285	10 vs. 34	1	0.8221	0.8369	0.1988	0.8571	0.4167	1	0.89884612244898	0.903832	0.13500693877551	0.853011102040816	0.389999673469388	1	0.102650607765256	0.100856964519843	0.0636681222951117	0.130103373143979	0.0423790449114384
1286	10 vs. 34	2	0.9942	0.9936	0.0519	0.9286	0.4167	2	0.98733412244898	0.985032326530612	0.0720954285714286	0.92485012244898	0.374998775510204	2	0.0100464514953486	0.0123890461273489	0.0270997599415362	0.0467822755882719	0.0481111504828868
1287	10 vs. 34	3	0.9428	0.9406	0.0967	0.8	0.4792	3	0.755337551020408	0.757762775510204	0.185275510204082	0.653356163265306	0.506666612244898	3	0.215412445918853	0.212311770503312	0.0832591056930451	0.204524859292461	0.0496309945955463
1288	10 vs. 35	1	0.8554	0.8584	0.1797	0.8667	0.375	1	0.89884612244898	0.903832	0.13500693877551	0.853011102040816	0.389999673469388	1	0.102650607765256	0.100856964519843	0.0636681222951117	0.130103373143979	0.0423790449114384
1289	10 vs. 35	2	0.9894	0.9881	0.0712	0.8966	0.3958	2	0.98733412244898	0.985032326530612	0.0720954285714286	0.92485012244898	0.374998775510204	2	0.0100464514953486	0.0123890461273489	0.0270997599415362	0.0467822755882719	0.0481111504828868
1290	10 vs. 35	3	0.8998	0.893	0.1289	0.8	0.4792	3	0.755337551020408	0.757762775510204	0.185275510204082	0.653356163265306	0.506666612244898	3	0.215412445918853	0.212311770503312	0.0832591056930451	0.204524859292461	0.0496309945955463
1291	10 vs. 36	1	0.8132	0.8293	0.2045	0.8	0.375	1	0.89884612244898	0.903832	0.13500693877551	0.853011102040816	0.389999673469388	1	0.102650607765256	0.100856964519843	0.0636681222951117	0.130103373143979	0.0423790449114384
1292	10 vs. 36	2	0.9865	0.9861	0.0798	0.8387	0.3542	2	0.98733412244898	0.985032326530612	0.0720954285714286	0.92485012244898	0.374998775510204	2	0.0100464514953486	0.0123890461273489	0.0270997599415362	0.0467822755882719	0.0481111504828868
1293	10 vs. 36	3	0.714	0.686	0.2203	0.6087	0.5208	3	0.755337551020408	0.757762775510204	0.185275510204082	0.653356163265306	0.506666612244898	3	0.215412445918853	0.212311770503312	0.0832591056930451	0.204524859292461	0.0496309945955463
1294	10 vs. 37	1	0.9835	0.9836	0.0606	0.9333	0.375	1	0.89884612244898	0.903832	0.13500693877551	0.853011102040816	0.389999673469388	1	0.102650607765256	0.100856964519843	0.0636681222951117	0.130103373143979	0.0423790449114384
1295	10 vs. 37	2	0.9967	0.9957	0.0393	1	0.4583	2	0.98733412244898	0.985032326530612	0.0720954285714286	0.92485012244898	0.374998775510204	2	0.0100464514953486	0.0123890461273489	0.0270997599415362	0.0467822755882719	0.0481111504828868
1296	10 vs. 37	3	0.9906	0.9903	0.039	1	0.4583	3	0.755337551020408	0.757762775510204	0.185275510204082	0.653356163265306	0.506666612244898	3	0.215412445918853	0.212311770503312	0.0832591056930451	0.204524859292461	0.0496309945955463
1297	10 vs. 38	1	0.9324	0.9387	0.1217	0.8276	0.3958	1	0.89884612244898	0.903832	0.13500693877551	0.853011102040816	0.389999673469388	1	0.102650607765256	0.100856964519843	0.0636681222951117	0.130103373143979	0.0423790449114384
1298	10 vs. 38	2	0.9917	0.9923	0.0628	0.8667	0.375	2	0.98733412244898	0.985032326530612	0.0720954285714286	0.92485012244898	0.374998775510204	2	0.0100464514953486	0.0123890461273489	0.0270997599415362	0.0467822755882719	0.0481111504828868
1299	10 vs. 38	3	0.9179	0.9246	0.1136	0.8696	0.5208	3	0.755337551020408	0.757762775510204	0.185275510204082	0.653356163265306	0.506666612244898	3	0.215412445918853	0.212311770503312	0.0832591056930451	0.204524859292461	0.0496309945955463
1300	10 vs. 39	1	0.8928	0.8955	0.1514	0.8276	0.3958	1	0.89884612244898	0.903832	0.13500693877551	0.853011102040816	0.389999673469388	1	0.102650607765256	0.100856964519843	0.0636681222951117	0.130103373143979	0.0423790449114384
1301	10 vs. 39	2	0.9909	0.9889	0.0657	0.8966	0.3958	2	0.98733412244898	0.985032326530612	0.0720954285714286	0.92485012244898	0.374998775510204	2	0.0100464514953486	0.0123890461273489	0.0270997599415362	0.0467822755882719	0.0481111504828868
1302	10 vs. 39	3	0.3658	0.2855	0.3308	0.3333	0.5	3	0.755337551020408	0.757762775510204	0.185275510204082	0.653356163265306	0.506666612244898	3	0.215412445918853	0.212311770503312	0.0832591056930451	0.204524859292461	0.0496309945955463
1303	10 vs. 40	1	0.7305	0.7641	0.2476	0.7586	0.3958	1	0.89884612244898	0.903832	0.13500693877551	0.853011102040816	0.389999673469388	1	0.102650607765256	0.100856964519843	0.0636681222951117	0.130103373143979	0.0423790449114384
1304	10 vs. 40	2	0.9821	0.9843	0.092	0.8387	0.3542	2	0.98733412244898	0.985032326530612	0.0720954285714286	0.92485012244898	0.374998775510204	2	0.0100464514953486	0.0123890461273489	0.0270997599415362	0.0467822755882719	0.0481111504828868
1305	10 vs. 40	3	0.8679	0.8581	0.1525	0.6667	0.5	3	0.755337551020408	0.757762775510204	0.185275510204082	0.653356163265306	0.506666612244898	3	0.215412445918853	0.212311770503312	0.0832591056930451	0.204524859292461	0.0496309945955463
1306	10 vs. 41	1	0.8411	0.8567	0.1889	0.8276	0.3958	1	0.89884612244898	0.903832	0.13500693877551	0.853011102040816	0.389999673469388	1	0.102650607765256	0.100856964519843	0.0636681222951117	0.130103373143979	0.0423790449114384
1307	10 vs. 41	2	0.9906	0.9909	0.0666	0.9286	0.4167	2	0.98733412244898	0.985032326530612	0.0720954285714286	0.92485012244898	0.374998775510204	2	0.0100464514953486	0.0123890461273489	0.0270997599415362	0.0467822755882719	0.0481111504828868
1308	10 vs. 41	3	0.8743	0.8635	0.1467	0.6667	0.4375	3	0.755337551020408	0.757762775510204	0.185275510204082	0.653356163265306	0.506666612244898	3	0.215412445918853	0.212311770503312	0.0832591056930451	0.204524859292461	0.0496309945955463
1309	10 vs. 42	1	0.9497	0.9548	0.1033	0.8148	0.4375	1	0.89884612244898	0.903832	0.13500693877551	0.853011102040816	0.389999673469388	1	0.102650607765256	0.100856964519843	0.0636681222951117	0.130103373143979	0.0423790449114384
1310	10 vs. 42	2	0.9953	0.9937	0.0466	0.963	0.4375	2	0.98733412244898	0.985032326530612	0.0720954285714286	0.92485012244898	0.374998775510204	2	0.0100464514953486	0.0123890461273489	0.0270997599415362	0.0467822755882719	0.0481111504828868
1311	10 vs. 42	3	0.8337	0.8194	0.1621	0.6667	0.5	3	0.755337551020408	0.757762775510204	0.185275510204082	0.653356163265306	0.506666612244898	3	0.215412445918853	0.212311770503312	0.0832591056930451	0.204524859292461	0.0496309945955463
1312	10 vs. 43	1	0.8996	0.9024	0.1485	0.8571	0.4167	1	0.89884612244898	0.903832	0.13500693877551	0.853011102040816	0.389999673469388	1	0.102650607765256	0.100856964519843	0.0636681222951117	0.130103373143979	0.0423790449114384
1313	10 vs. 43	2	0.9883	0.986	0.075	0.8966	0.3958	2	0.98733412244898	0.985032326530612	0.0720954285714286	0.92485012244898	0.374998775510204	2	0.0100464514953486	0.0123890461273489	0.0270997599415362	0.0467822755882719	0.0481111504828868
1314	10 vs. 43	3	0.8522	0.8431	0.1583	0.7692	0.4583	3	0.755337551020408	0.757762775510204	0.185275510204082	0.653356163265306	0.506666612244898	3	0.215412445918853	0.212311770503312	0.0832591056930451	0.204524859292461	0.0496309945955463
1315	10 vs. 44	1	0.9259	0.9263	0.1207	0.8	0.4792	1	0.89884612244898	0.903832	0.13500693877551	0.853011102040816	0.389999673469388	1	0.102650607765256	0.100856964519843	0.0636681222951117	0.130103373143979	0.0423790449114384
1316	10 vs. 44	2	0.9962	0.9949	0.0423	1	0.4583	2	0.98733412244898	0.985032326530612	0.0720954285714286	0.92485012244898	0.374998775510204	2	0.0100464514953486	0.0123890461273489	0.0270997599415362	0.0467822755882719	0.0481111504828868
1317	10 vs. 44	3	0.8924	0.8839	0.1334	0.6667	0.4375	3	0.755337551020408	0.757762775510204	0.185275510204082	0.653356163265306	0.506666612244898	3	0.215412445918853	0.212311770503312	0.0832591056930451	0.204524859292461	0.0496309945955463
1318	10 vs. 45	1	0.8387	0.8559	0.1917	0.8276	0.3958	1	0.89884612244898	0.903832	0.13500693877551	0.853011102040816	0.389999673469388	1	0.102650607765256	0.100856964519843	0.0636681222951117	0.130103373143979	0.0423790449114384
1319	10 vs. 45	2	0.9884	0.9879	0.0737	0.8667	0.375	2	0.98733412244898	0.985032326530612	0.0720954285714286	0.92485012244898	0.374998775510204	2	0.0100464514953486	0.0123890461273489	0.0270997599415362	0.0467822755882719	0.0481111504828868
1320	10 vs. 45	3	0.7051	0.695	0.232	0.6957	0.5208	3	0.755337551020408	0.757762775510204	0.185275510204082	0.653356163265306	0.506666612244898	3	0.215412445918853	0.212311770503312	0.0832591056930451	0.204524859292461	0.0496309945955463
1321	10 vs. 46	1	0.9319	0.9362	0.1162	0.8966	0.3958	1	0.89884612244898	0.903832	0.13500693877551	0.853011102040816	0.389999673469388	1	0.102650607765256	0.100856964519843	0.0636681222951117	0.130103373143979	0.0423790449114384
1322	10 vs. 46	2	0.9845	0.9793	0.0844	0.9286	0.4167	2	0.98733412244898	0.985032326530612	0.0720954285714286	0.92485012244898	0.374998775510204	2	0.0100464514953486	0.0123890461273489	0.0270997599415362	0.0467822755882719	0.0481111504828868
1323	10 vs. 46	3	0.7811	0.8436	0.1836	0.6364	0.5417	3	0.755337551020408	0.757762775510204	0.185275510204082	0.653356163265306	0.506666612244898	3	0.215412445918853	0.212311770503312	0.0832591056930451	0.204524859292461	0.0496309945955463
1324	10 vs. 47	1	0.8936	0.8963	0.1544	0.8387	0.3542	1	0.89884612244898	0.903832	0.13500693877551	0.853011102040816	0.389999673469388	1	0.102650607765256	0.100856964519843	0.0636681222951117	0.130103373143979	0.0423790449114384
1325	10 vs. 47	2	0.9913	0.9898	0.064	0.8966	0.3958	2	0.98733412244898	0.985032326530612	0.0720954285714286	0.92485012244898	0.374998775510204	2	0.0100464514953486	0.0123890461273489	0.0270997599415362	0.0467822755882719	0.0481111504828868
1326	10 vs. 47	3	0.8014	0.7885	0.1844	0.64	0.4792	3	0.755337551020408	0.757762775510204	0.185275510204082	0.653356163265306	0.506666612244898	3	0.215412445918853	0.212311770503312	0.0832591056930451	0.204524859292461	0.0496309945955463
1327	10 vs. 48	1	0.9533	0.9589	0.0975	0.9333	0.375	1	0.89884612244898	0.903832	0.13500693877551	0.853011102040816	0.389999673469388	1	0.102650607765256	0.100856964519843	0.0636681222951117	0.130103373143979	0.0423790449114384
1328	10 vs. 48	2	0.9927	0.9908	0.0581	1	0.4583	2	0.98733412244898	0.985032326530612	0.0720954285714286	0.92485012244898	0.374998775510204	2	0.0100464514953486	0.0123890461273489	0.0270997599415362	0.0467822755882719	0.0481111504828868
1329	10 vs. 48	3	0.724	0.7474	0.2061	0.5	0.5833	3	0.755337551020408	0.757762775510204	0.185275510204082	0.653356163265306	0.506666612244898	3	0.215412445918853	0.212311770503312	0.0832591056930451	0.204524859292461	0.0496309945955463
1330	10 vs. 49	1	0.8129	0.8253	0.2086	0.8276	0.3958	1	0.89884612244898	0.903832	0.13500693877551	0.853011102040816	0.389999673469388	1	0.102650607765256	0.100856964519843	0.0636681222951117	0.130103373143979	0.0423790449114384
1331	10 vs. 49	2	0.9893	0.9876	0.0715	0.8966	0.3958	2	0.98733412244898	0.985032326530612	0.0720954285714286	0.92485012244898	0.374998775510204	2	0.0100464514953486	0.0123890461273489	0.0270997599415362	0.0467822755882719	0.0481111504828868
1332	10 vs. 49	3	0.819	0.8131	0.1803	0.6667	0.5	3	0.755337551020408	0.757762775510204	0.185275510204082	0.653356163265306	0.506666612244898	3	0.215412445918853	0.212311770503312	0.0832591056930451	0.204524859292461	0.0496309945955463
1333	10 vs. 50	1	0.9822	0.9839	0.0615	0.9655	0.3958	1	0.89884612244898	0.903832	0.13500693877551	0.853011102040816	0.389999673469388	1	0.102650607765256	0.100856964519843	0.0636681222951117	0.130103373143979	0.0423790449114384
1334	10 vs. 50	2	0.9936	0.9911	0.0542	1	0.4583	2	0.98733412244898	0.985032326530612	0.0720954285714286	0.92485012244898	0.374998775510204	2	0.0100464514953486	0.0123890461273489	0.0270997599415362	0.0467822755882719	0.0481111504828868
1335	10 vs. 50	3	0.9551	0.9535	0.0858	0.8571	0.4167	3	0.755337551020408	0.757762775510204	0.185275510204082	0.653356163265306	0.506666612244898	3	0.215412445918853	0.212311770503312	0.0832591056930451	0.204524859292461	0.0496309945955463
1336	11 vs. 12	1	0.9366	0.9412	0.1235	0.8966	0.3958	1	0.89884612244898	0.903832	0.13500693877551	0.853011102040816	0.389999673469388	1	0.102650607765256	0.100856964519843	0.0636681222951117	0.130103373143979	0.0423790449114384
1337	11 vs. 12	2	0.9917	0.9911	0.0628	0.9032	0.3542	2	0.98733412244898	0.985032326530612	0.0720954285714286	0.92485012244898	0.374998775510204	2	0.0100464514953486	0.0123890461273489	0.0270997599415362	0.0467822755882719	0.0481111504828868
1338	11 vs. 12	3	0.959	0.9559	0.0871	0.8889	0.4375	3	0.755337551020408	0.757762775510204	0.185275510204082	0.653356163265306	0.506666612244898	3	0.215412445918853	0.212311770503312	0.0832591056930451	0.204524859292461	0.0496309945955463
1339	11 vs. 13	1	0.8478	0.8466	0.1815	0.8387	0.3542	1	0.89884612244898	0.903832	0.13500693877551	0.853011102040816	0.389999673469388	1	0.102650607765256	0.100856964519843	0.0636681222951117	0.130103373143979	0.0423790449114384
1340	11 vs. 13	2	0.985	0.9808	0.084	0.963	0.4375	2	0.98733412244898	0.985032326530612	0.0720954285714286	0.92485012244898	0.374998775510204	2	0.0100464514953486	0.0123890461273489	0.0270997599415362	0.0467822755882719	0.0481111504828868
1341	11 vs. 13	3	0.8674	0.8403	0.1572	0.7692	0.4583	3	0.755337551020408	0.757762775510204	0.185275510204082	0.653356163265306	0.506666612244898	3	0.215412445918853	0.212311770503312	0.0832591056930451	0.204524859292461	0.0496309945955463
1342	11 vs. 14	1	0.971	0.972	0.0817	0.9655	0.3958	1	0.89884612244898	0.903832	0.13500693877551	0.853011102040816	0.389999673469388	1	0.102650607765256	0.100856964519843	0.0636681222951117	0.130103373143979	0.0423790449114384
1343	11 vs. 14	2	0.9953	0.9936	0.0473	0.8966	0.3958	2	0.98733412244898	0.985032326530612	0.0720954285714286	0.92485012244898	0.374998775510204	2	0.0100464514953486	0.0123890461273489	0.0270997599415362	0.0467822755882719	0.0481111504828868
1344	11 vs. 14	3	0.9148	0.8979	0.1232	0.6923	0.4583	3	0.755337551020408	0.757762775510204	0.185275510204082	0.653356163265306	0.506666612244898	3	0.215412445918853	0.212311770503312	0.0832591056930451	0.204524859292461	0.0496309945955463
1345	11 vs. 15	1	0.9782	0.979	0.0705	0.9677	0.3542	1	0.89884612244898	0.903832	0.13500693877551	0.853011102040816	0.389999673469388	1	0.102650607765256	0.100856964519843	0.0636681222951117	0.130103373143979	0.0423790449114384
1346	11 vs. 15	2	0.9959	0.9944	0.0435	0.9655	0.3958	2	0.98733412244898	0.985032326530612	0.0720954285714286	0.92485012244898	0.374998775510204	2	0.0100464514953486	0.0123890461273489	0.0270997599415362	0.0467822755882719	0.0481111504828868
1347	11 vs. 15	3	0.8761	0.8523	0.1487	0.6667	0.4375	3	0.755337551020408	0.757762775510204	0.185275510204082	0.653356163265306	0.506666612244898	3	0.215412445918853	0.212311770503312	0.0832591056930451	0.204524859292461	0.0496309945955463
1348	11 vs. 16	1	0.9637	0.9735	0.0909	0.7857	0.4167	1	0.89884612244898	0.903832	0.13500693877551	0.853011102040816	0.389999673469388	1	0.102650607765256	0.100856964519843	0.0636681222951117	0.130103373143979	0.0423790449114384
1349	11 vs. 16	2	0.9923	0.9938	0.0593	0.9286	0.4167	2	0.98733412244898	0.985032326530612	0.0720954285714286	0.92485012244898	0.374998775510204	2	0.0100464514953486	0.0123890461273489	0.0270997599415362	0.0467822755882719	0.0481111504828868
1350	11 vs. 16	3	0.3926	0.446	0.3227	0.2857	0.4167	3	0.755337551020408	0.757762775510204	0.185275510204082	0.653356163265306	0.506666612244898	3	0.215412445918853	0.212311770503312	0.0832591056930451	0.204524859292461	0.0496309945955463
1351	11 vs. 17	1	0.9661	0.9662	0.0883	1	0.375	1	0.89884612244898	0.903832	0.13500693877551	0.853011102040816	0.389999673469388	1	0.102650607765256	0.100856964519843	0.0636681222951117	0.130103373143979	0.0423790449114384
1352	11 vs. 17	2	0.9976	0.9967	0.0339	0.9655	0.3958	2	0.98733412244898	0.985032326530612	0.0720954285714286	0.92485012244898	0.374998775510204	2	0.0100464514953486	0.0123890461273489	0.0270997599415362	0.0467822755882719	0.0481111504828868
1353	11 vs. 17	3	0.9155	0.8995	0.1282	0.88	0.4792	3	0.755337551020408	0.757762775510204	0.185275510204082	0.653356163265306	0.506666612244898	3	0.215412445918853	0.212311770503312	0.0832591056930451	0.204524859292461	0.0496309945955463
1354	11 vs. 18	1	0.9828	0.9863	0.063	0.9032	0.3542	1	0.89884612244898	0.903832	0.13500693877551	0.853011102040816	0.389999673469388	1	0.102650607765256	0.100856964519843	0.0636681222951117	0.130103373143979	0.0423790449114384
1355	11 vs. 18	2	0.9963	0.9964	0.0414	0.8966	0.3958	2	0.98733412244898	0.985032326530612	0.0720954285714286	0.92485012244898	0.374998775510204	2	0.0100464514953486	0.0123890461273489	0.0270997599415362	0.0467822755882719	0.0481111504828868
1356	11 vs. 18	3	0.8884	0.9042	0.1396	0.8148	0.4375	3	0.755337551020408	0.757762775510204	0.185275510204082	0.653356163265306	0.506666612244898	3	0.215412445918853	0.212311770503312	0.0832591056930451	0.204524859292461	0.0496309945955463
1357	11 vs. 19	1	0.9683	0.9681	0.0849	0.9032	0.3542	1	0.89884612244898	0.903832	0.13500693877551	0.853011102040816	0.389999673469388	1	0.102650607765256	0.100856964519843	0.0636681222951117	0.130103373143979	0.0423790449114384
1358	11 vs. 19	2	0.9946	0.9926	0.0503	0.8966	0.3958	2	0.98733412244898	0.985032326530612	0.0720954285714286	0.92485012244898	0.374998775510204	2	0.0100464514953486	0.0123890461273489	0.0270997599415362	0.0467822755882719	0.0481111504828868
1359	11 vs. 19	3	0.9015	0.8861	0.1316	0.7857	0.4167	3	0.755337551020408	0.757762775510204	0.185275510204082	0.653356163265306	0.506666612244898	3	0.215412445918853	0.212311770503312	0.0832591056930451	0.204524859292461	0.0496309945955463
1360	11 vs. 20	1	0.978	0.9805	0.0712	0.8889	0.4375	1	0.89884612244898	0.903832	0.13500693877551	0.853011102040816	0.389999673469388	1	0.102650607765256	0.100856964519843	0.0636681222951117	0.130103373143979	0.0423790449114384
1361	11 vs. 20	2	0.9947	0.9946	0.049	0.963	0.4375	2	0.98733412244898	0.985032326530612	0.0720954285714286	0.92485012244898	0.374998775510204	2	0.0100464514953486	0.0123890461273489	0.0270997599415362	0.0467822755882719	0.0481111504828868
1362	11 vs. 20	3	0.9558	0.958	0.0894	0.8333	0.5	3	0.755337551020408	0.757762775510204	0.185275510204082	0.653356163265306	0.506666612244898	3	0.215412445918853	0.212311770503312	0.0832591056930451	0.204524859292461	0.0496309945955463
1363	11 vs. 21	1	0.9455	0.955	0.112	1	0.375	1	0.89884612244898	0.903832	0.13500693877551	0.853011102040816	0.389999673469388	1	0.102650607765256	0.100856964519843	0.0636681222951117	0.130103373143979	0.0423790449114384
1364	11 vs. 21	2	0.9774	0.9775	0.1037	0.8485	0.3125	2	0.98733412244898	0.985032326530612	0.0720954285714286	0.92485012244898	0.374998775510204	2	0.0100464514953486	0.0123890461273489	0.0270997599415362	0.0467822755882719	0.0481111504828868
1365	11 vs. 21	3	0.4305	0.4702	0.3013	0.3846	0.4583	3	0.755337551020408	0.757762775510204	0.185275510204082	0.653356163265306	0.506666612244898	3	0.215412445918853	0.212311770503312	0.0832591056930451	0.204524859292461	0.0496309945955463
1366	11 vs. 22	1	0.9723	0.9732	0.0797	0.9655	0.3958	1	0.89884612244898	0.903832	0.13500693877551	0.853011102040816	0.389999673469388	1	0.102650607765256	0.100856964519843	0.0636681222951117	0.130103373143979	0.0423790449114384
1367	11 vs. 22	2	0.997	0.9963	0.037	0.9333	0.375	2	0.98733412244898	0.985032326530612	0.0720954285714286	0.92485012244898	0.374998775510204	2	0.0100464514953486	0.0123890461273489	0.0270997599415362	0.0467822755882719	0.0481111504828868
1368	11 vs. 22	3	0.9259	0.935	0.1148	0.88	0.4792	3	0.755337551020408	0.757762775510204	0.185275510204082	0.653356163265306	0.506666612244898	3	0.215412445918853	0.212311770503312	0.0832591056930451	0.204524859292461	0.0496309945955463
1369	11 vs. 23	1	0.9814	0.9812	0.0655	0.9375	0.3333	1	0.89884612244898	0.903832	0.13500693877551	0.853011102040816	0.389999673469388	1	0.102650607765256	0.100856964519843	0.0636681222951117	0.130103373143979	0.0423790449114384
1370	11 vs. 23	2	0.9966	0.9961	0.0399	0.963	0.4375	2	0.98733412244898	0.985032326530612	0.0720954285714286	0.92485012244898	0.374998775510204	2	0.0100464514953486	0.0123890461273489	0.0270997599415362	0.0467822755882719	0.0481111504828868
1371	11 vs. 23	3	0.9682	0.9628	0.076	0.8462	0.4583	3	0.755337551020408	0.757762775510204	0.185275510204082	0.653356163265306	0.506666612244898	3	0.215412445918853	0.212311770503312	0.0832591056930451	0.204524859292461	0.0496309945955463
1372	11 vs. 24	1	0.9747	0.9749	0.079	1	0.375	1	0.89884612244898	0.903832	0.13500693877551	0.853011102040816	0.389999673469388	1	0.102650607765256	0.100856964519843	0.0636681222951117	0.130103373143979	0.0423790449114384
1373	11 vs. 24	2	0.9969	0.9959	0.0378	0.9333	0.375	2	0.98733412244898	0.985032326530612	0.0720954285714286	0.92485012244898	0.374998775510204	2	0.0100464514953486	0.0123890461273489	0.0270997599415362	0.0467822755882719	0.0481111504828868
1374	11 vs. 24	3	0.9199	0.9043	0.123	0.88	0.4792	3	0.755337551020408	0.757762775510204	0.185275510204082	0.653356163265306	0.506666612244898	3	0.215412445918853	0.212311770503312	0.0832591056930451	0.204524859292461	0.0496309945955463
1375	11 vs. 25	1	0.9632	0.9632	0.0925	1	0.375	1	0.89884612244898	0.903832	0.13500693877551	0.853011102040816	0.389999673469388	1	0.102650607765256	0.100856964519843	0.0636681222951117	0.130103373143979	0.0423790449114384
1376	11 vs. 25	2	0.9852	0.9824	0.0836	0.9333	0.375	2	0.98733412244898	0.985032326530612	0.0720954285714286	0.92485012244898	0.374998775510204	2	0.0100464514953486	0.0123890461273489	0.0270997599415362	0.0467822755882719	0.0481111504828868
1377	11 vs. 25	3	0.769	0.8131	0.1969	0.5833	0.5	3	0.755337551020408	0.757762775510204	0.185275510204082	0.653356163265306	0.506666612244898	3	0.215412445918853	0.212311770503312	0.0832591056930451	0.204524859292461	0.0496309945955463
1378	11 vs. 26	1	0.9913	0.9918	0.0456	0.9677	0.3542	1	0.89884612244898	0.903832	0.13500693877551	0.853011102040816	0.389999673469388	1	0.102650607765256	0.100856964519843	0.0636681222951117	0.130103373143979	0.0423790449114384
1379	11 vs. 26	2	0.9987	0.9982	0.0249	1	0.4167	2	0.98733412244898	0.985032326530612	0.0720954285714286	0.92485012244898	0.374998775510204	2	0.0100464514953486	0.0123890461273489	0.0270997599415362	0.0467822755882719	0.0481111504828868
1380	11 vs. 26	3	0.9512	0.9422	0.0939	0.8	0.4792	3	0.755337551020408	0.757762775510204	0.185275510204082	0.653356163265306	0.506666612244898	3	0.215412445918853	0.212311770503312	0.0832591056930451	0.204524859292461	0.0496309945955463
1381	11 vs. 27	1	0.9377	0.9405	0.1189	0.8485	0.3125	1	0.89884612244898	0.903832	0.13500693877551	0.853011102040816	0.389999673469388	1	0.102650607765256	0.100856964519843	0.0636681222951117	0.130103373143979	0.0423790449114384
1382	11 vs. 27	2	0.9919	0.9891	0.0614	0.9286	0.4167	2	0.98733412244898	0.985032326530612	0.0720954285714286	0.92485012244898	0.374998775510204	2	0.0100464514953486	0.0123890461273489	0.0270997599415362	0.0467822755882719	0.0481111504828868
1383	11 vs. 27	3	0.5889	0.617	0.2615	0.48	0.4792	3	0.755337551020408	0.757762775510204	0.185275510204082	0.653356163265306	0.506666612244898	3	0.215412445918853	0.212311770503312	0.0832591056930451	0.204524859292461	0.0496309945955463
1384	11 vs. 28	1	0.9821	0.9825	0.0642	0.8889	0.4375	1	0.89884612244898	0.903832	0.13500693877551	0.853011102040816	0.389999673469388	1	0.102650607765256	0.100856964519843	0.0636681222951117	0.130103373143979	0.0423790449114384
1385	11 vs. 28	2	0.9954	0.9938	0.0467	0.8966	0.3958	2	0.98733412244898	0.985032326530612	0.0720954285714286	0.92485012244898	0.374998775510204	2	0.0100464514953486	0.0123890461273489	0.0270997599415362	0.0467822755882719	0.0481111504828868
1386	11 vs. 28	3	0.8027	0.7941	0.1869	0.72	0.4792	3	0.755337551020408	0.757762775510204	0.185275510204082	0.653356163265306	0.506666612244898	3	0.215412445918853	0.212311770503312	0.0832591056930451	0.204524859292461	0.0496309945955463
1387	11 vs. 29	1	0.9746	0.9771	0.0763	0.8966	0.3958	1	0.89884612244898	0.903832	0.13500693877551	0.853011102040816	0.389999673469388	1	0.102650607765256	0.100856964519843	0.0636681222951117	0.130103373143979	0.0423790449114384
1388	11 vs. 29	2	0.9917	0.9909	0.0613	0.963	0.4375	2	0.98733412244898	0.985032326530612	0.0720954285714286	0.92485012244898	0.374998775510204	2	0.0100464514953486	0.0123890461273489	0.0270997599415362	0.0467822755882719	0.0481111504828868
1389	11 vs. 29	3	0.9302	0.9247	0.1128	0.7692	0.4583	3	0.755337551020408	0.757762775510204	0.185275510204082	0.653356163265306	0.506666612244898	3	0.215412445918853	0.212311770503312	0.0832591056930451	0.204524859292461	0.0496309945955463
1390	11 vs. 30	1	0.9388	0.946	0.1201	0.8966	0.3958	1	0.89884612244898	0.903832	0.13500693877551	0.853011102040816	0.389999673469388	1	0.102650607765256	0.100856964519843	0.0636681222951117	0.130103373143979	0.0423790449114384
1391	11 vs. 30	2	0.9901	0.9909	0.069	0.9032	0.3542	2	0.98733412244898	0.985032326530612	0.0720954285714286	0.92485012244898	0.374998775510204	2	0.0100464514953486	0.0123890461273489	0.0270997599415362	0.0467822755882719	0.0481111504828868
1392	11 vs. 30	3	0.7554	0.7501	0.204	0.6087	0.5208	3	0.755337551020408	0.757762775510204	0.185275510204082	0.653356163265306	0.506666612244898	3	0.215412445918853	0.212311770503312	0.0832591056930451	0.204524859292461	0.0496309945955463
1393	11 vs. 31	1	0.9836	0.9845	0.0616	0.9655	0.3958	1	0.89884612244898	0.903832	0.13500693877551	0.853011102040816	0.389999673469388	1	0.102650607765256	0.100856964519843	0.0636681222951117	0.130103373143979	0.0423790449114384
1394	11 vs. 31	2	0.9981	0.998	0.0292	1	0.4167	2	0.98733412244898	0.985032326530612	0.0720954285714286	0.92485012244898	0.374998775510204	2	0.0100464514953486	0.0123890461273489	0.0270997599415362	0.0467822755882719	0.0481111504828868
1395	11 vs. 31	3	0.9654	0.9591	0.0801	0.8889	0.4375	3	0.755337551020408	0.757762775510204	0.185275510204082	0.653356163265306	0.506666612244898	3	0.215412445918853	0.212311770503312	0.0832591056930451	0.204524859292461	0.0496309945955463
1396	11 vs. 32	1	0.9143	0.922	0.1402	0.9655	0.3958	1	0.89884612244898	0.903832	0.13500693877551	0.853011102040816	0.389999673469388	1	0.102650607765256	0.100856964519843	0.0636681222951117	0.130103373143979	0.0423790449114384
1397	11 vs. 32	2	0.9905	0.989	0.067	0.8667	0.375	2	0.98733412244898	0.985032326530612	0.0720954285714286	0.92485012244898	0.374998775510204	2	0.0100464514953486	0.0123890461273489	0.0270997599415362	0.0467822755882719	0.0481111504828868
1398	11 vs. 32	3	0.9108	0.9133	0.1255	0.7692	0.4583	3	0.755337551020408	0.757762775510204	0.185275510204082	0.653356163265306	0.506666612244898	3	0.215412445918853	0.212311770503312	0.0832591056930451	0.204524859292461	0.0496309945955463
1399	11 vs. 33	1	0.8022	0.8129	0.2072	0.6154	0.4583	1	0.89884612244898	0.903832	0.13500693877551	0.853011102040816	0.389999673469388	1	0.102650607765256	0.100856964519843	0.0636681222951117	0.130103373143979	0.0423790449114384
1400	11 vs. 33	2	0.9892	0.9874	0.0702	0.963	0.4375	2	0.98733412244898	0.985032326530612	0.0720954285714286	0.92485012244898	0.374998775510204	2	0.0100464514953486	0.0123890461273489	0.0270997599415362	0.0467822755882719	0.0481111504828868
1401	11 vs. 33	3	0.82	0.8191	0.1756	0.6154	0.4583	3	0.755337551020408	0.757762775510204	0.185275510204082	0.653356163265306	0.506666612244898	3	0.215412445918853	0.212311770503312	0.0832591056930451	0.204524859292461	0.0496309945955463
1402	11 vs. 34	1	0.9536	0.9565	0.104	0.9655	0.3958	1	0.89884612244898	0.903832	0.13500693877551	0.853011102040816	0.389999673469388	1	0.102650607765256	0.100856964519843	0.0636681222951117	0.130103373143979	0.0423790449114384
1403	11 vs. 34	2	0.997	0.9961	0.0372	0.8966	0.3958	2	0.98733412244898	0.985032326530612	0.0720954285714286	0.92485012244898	0.374998775510204	2	0.0100464514953486	0.0123890461273489	0.0270997599415362	0.0467822755882719	0.0481111504828868
1404	11 vs. 34	3	0.9188	0.9064	0.1203	0.6923	0.4583	3	0.755337551020408	0.757762775510204	0.185275510204082	0.653356163265306	0.506666612244898	3	0.215412445918853	0.212311770503312	0.0832591056930451	0.204524859292461	0.0496309945955463
1405	11 vs. 35	1	0.944	0.9438	0.1144	0.9032	0.3542	1	0.89884612244898	0.903832	0.13500693877551	0.853011102040816	0.389999673469388	1	0.102650607765256	0.100856964519843	0.0636681222951117	0.130103373143979	0.0423790449114384
1406	11 vs. 35	2	0.9904	0.9877	0.068	0.9333	0.375	2	0.98733412244898	0.985032326530612	0.0720954285714286	0.92485012244898	0.374998775510204	2	0.0100464514953486	0.0123890461273489	0.0270997599415362	0.0467822755882719	0.0481111504828868
1407	11 vs. 35	3	0.9293	0.9349	0.1125	0.7692	0.4583	3	0.755337551020408	0.757762775510204	0.185275510204082	0.653356163265306	0.506666612244898	3	0.215412445918853	0.212311770503312	0.0832591056930451	0.204524859292461	0.0496309945955463
1408	11 vs. 36	1	0.952	0.9556	0.1062	0.9677	0.3542	1	0.89884612244898	0.903832	0.13500693877551	0.853011102040816	0.389999673469388	1	0.102650607765256	0.100856964519843	0.0636681222951117	0.130103373143979	0.0423790449114384
1409	11 vs. 36	2	0.9913	0.9899	0.0645	0.875	0.3333	2	0.98733412244898	0.985032326530612	0.0720954285714286	0.92485012244898	0.374998775510204	2	0.0100464514953486	0.0123890461273489	0.0270997599415362	0.0467822755882719	0.0481111504828868
1410	11 vs. 36	3	0.9272	0.9131	0.1148	0.8333	0.5	3	0.755337551020408	0.757762775510204	0.185275510204082	0.653356163265306	0.506666612244898	3	0.215412445918853	0.212311770503312	0.0832591056930451	0.204524859292461	0.0496309945955463
1411	11 vs. 37	1	0.9772	0.9812	0.0722	0.9032	0.3542	1	0.89884612244898	0.903832	0.13500693877551	0.853011102040816	0.389999673469388	1	0.102650607765256	0.100856964519843	0.0636681222951117	0.130103373143979	0.0423790449114384
1412	11 vs. 37	2	0.9942	0.9943	0.0515	0.963	0.4375	2	0.98733412244898	0.985032326530612	0.0720954285714286	0.92485012244898	0.374998775510204	2	0.0100464514953486	0.0123890461273489	0.0270997599415362	0.0467822755882719	0.0481111504828868
1413	11 vs. 37	3	0.8785	0.8666	0.1462	0.6667	0.4375	3	0.755337551020408	0.757762775510204	0.185275510204082	0.653356163265306	0.506666612244898	3	0.215412445918853	0.212311770503312	0.0832591056930451	0.204524859292461	0.0496309945955463
1414	11 vs. 38	1	0.9928	0.9928	0.0408	1	0.375	1	0.89884612244898	0.903832	0.13500693877551	0.853011102040816	0.389999673469388	1	0.102650607765256	0.100856964519843	0.0636681222951117	0.130103373143979	0.0423790449114384
1415	11 vs. 38	2	0.9944	0.9936	0.0521	0.9032	0.3542	2	0.98733412244898	0.985032326530612	0.0720954285714286	0.92485012244898	0.374998775510204	2	0.0100464514953486	0.0123890461273489	0.0270997599415362	0.0467822755882719	0.0481111504828868
1416	11 vs. 38	3	0.8516	0.8779	0.16	0.6667	0.5	3	0.755337551020408	0.757762775510204	0.185275510204082	0.653356163265306	0.506666612244898	3	0.215412445918853	0.212311770503312	0.0832591056930451	0.204524859292461	0.0496309945955463
1417	11 vs. 39	1	0.9843	0.9845	0.06	1	0.375	1	0.89884612244898	0.903832	0.13500693877551	0.853011102040816	0.389999673469388	1	0.102650607765256	0.100856964519843	0.0636681222951117	0.130103373143979	0.0423790449114384
1418	11 vs. 39	2	0.995	0.9934	0.0494	0.9333	0.375	2	0.98733412244898	0.985032326530612	0.0720954285714286	0.92485012244898	0.374998775510204	2	0.0100464514953486	0.0123890461273489	0.0270997599415362	0.0467822755882719	0.0481111504828868
1419	11 vs. 39	3	0.7546	0.7045	0.2123	0.72	0.4792	3	0.755337551020408	0.757762775510204	0.185275510204082	0.653356163265306	0.506666612244898	3	0.215412445918853	0.212311770503312	0.0832591056930451	0.204524859292461	0.0496309945955463
1420	11 vs. 40	1	0.892	0.9066	0.1608	0.9333	0.375	1	0.89884612244898	0.903832	0.13500693877551	0.853011102040816	0.389999673469388	1	0.102650607765256	0.100856964519843	0.0636681222951117	0.130103373143979	0.0423790449114384
1421	11 vs. 40	2	0.9836	0.9825	0.0882	0.875	0.3333	2	0.98733412244898	0.985032326530612	0.0720954285714286	0.92485012244898	0.374998775510204	2	0.0100464514953486	0.0123890461273489	0.0270997599415362	0.0467822755882719	0.0481111504828868
1422	11 vs. 40	3	0.9686	0.9635	0.0762	0.88	0.4792	3	0.755337551020408	0.757762775510204	0.185275510204082	0.653356163265306	0.506666612244898	3	0.215412445918853	0.212311770503312	0.0832591056930451	0.204524859292461	0.0496309945955463
1423	11 vs. 41	1	0.9575	0.9608	0.0999	1	0.375	1	0.89884612244898	0.903832	0.13500693877551	0.853011102040816	0.389999673469388	1	0.102650607765256	0.100856964519843	0.0636681222951117	0.130103373143979	0.0423790449114384
1424	11 vs. 41	2	0.9922	0.9907	0.061	0.8966	0.3958	2	0.98733412244898	0.985032326530612	0.0720954285714286	0.92485012244898	0.374998775510204	2	0.0100464514953486	0.0123890461273489	0.0270997599415362	0.0467822755882719	0.0481111504828868
1425	11 vs. 41	3	0.9519	0.9471	0.0935	0.7857	0.4167	3	0.755337551020408	0.757762775510204	0.185275510204082	0.653356163265306	0.506666612244898	3	0.215412445918853	0.212311770503312	0.0832591056930451	0.204524859292461	0.0496309945955463
1426	11 vs. 42	1	0.9889	0.9888	0.051	0.9286	0.4167	1	0.89884612244898	0.903832	0.13500693877551	0.853011102040816	0.389999673469388	1	0.102650607765256	0.100856964519843	0.0636681222951117	0.130103373143979	0.0423790449114384
1427	11 vs. 42	2	0.9975	0.9967	0.0337	1	0.4167	2	0.98733412244898	0.985032326530612	0.0720954285714286	0.92485012244898	0.374998775510204	2	0.0100464514953486	0.0123890461273489	0.0270997599415362	0.0467822755882719	0.0481111504828868
1428	11 vs. 42	3	0.9679	0.9706	0.0784	0.88	0.4792	3	0.755337551020408	0.757762775510204	0.185275510204082	0.653356163265306	0.506666612244898	3	0.215412445918853	0.212311770503312	0.0832591056930451	0.204524859292461	0.0496309945955463
1429	11 vs. 43	1	0.9815	0.9817	0.0651	0.9655	0.3958	1	0.89884612244898	0.903832	0.13500693877551	0.853011102040816	0.389999673469388	1	0.102650607765256	0.100856964519843	0.0636681222951117	0.130103373143979	0.0423790449114384
1430	11 vs. 43	2	0.9885	0.9849	0.0747	0.9333	0.375	2	0.98733412244898	0.985032326530612	0.0720954285714286	0.92485012244898	0.374998775510204	2	0.0100464514953486	0.0123890461273489	0.0270997599415362	0.0467822755882719	0.0481111504828868
1431	11 vs. 43	3	0.9899	0.9881	0.0433	0.8889	0.4375	3	0.755337551020408	0.757762775510204	0.185275510204082	0.653356163265306	0.506666612244898	3	0.215412445918853	0.212311770503312	0.0832591056930451	0.204524859292461	0.0496309945955463
1432	11 vs. 44	1	0.8096	0.8114	0.2007	0.6923	0.4583	1	0.89884612244898	0.903832	0.13500693877551	0.853011102040816	0.389999673469388	1	0.102650607765256	0.100856964519843	0.0636681222951117	0.130103373143979	0.0423790449114384
1433	11 vs. 44	2	0.9976	0.9969	0.0343	0.963	0.4375	2	0.98733412244898	0.985032326530612	0.0720954285714286	0.92485012244898	0.374998775510204	2	0.0100464514953486	0.0123890461273489	0.0270997599415362	0.0467822755882719	0.0481111504828868
1434	11 vs. 44	3	0.9393	0.9314	0.1044	0.8571	0.4167	3	0.755337551020408	0.757762775510204	0.185275510204082	0.653356163265306	0.506666612244898	3	0.215412445918853	0.212311770503312	0.0832591056930451	0.204524859292461	0.0496309945955463
1435	11 vs. 45	1	0.9509	0.9549	0.1081	0.9333	0.375	1	0.89884612244898	0.903832	0.13500693877551	0.853011102040816	0.389999673469388	1	0.102650607765256	0.100856964519843	0.0636681222951117	0.130103373143979	0.0423790449114384
1436	11 vs. 45	2	0.9902	0.9879	0.0682	0.9032	0.3542	2	0.98733412244898	0.985032326530612	0.0720954285714286	0.92485012244898	0.374998775510204	2	0.0100464514953486	0.0123890461273489	0.0270997599415362	0.0467822755882719	0.0481111504828868
1437	11 vs. 45	3	0.8988	0.8921	0.1397	0.75	0.5	3	0.755337551020408	0.757762775510204	0.185275510204082	0.653356163265306	0.506666612244898	3	0.215412445918853	0.212311770503312	0.0832591056930451	0.204524859292461	0.0496309945955463
1438	11 vs. 46	1	0.8713	0.8705	0.1671	0.8667	0.375	1	0.89884612244898	0.903832	0.13500693877551	0.853011102040816	0.389999673469388	1	0.102650607765256	0.100856964519843	0.0636681222951117	0.130103373143979	0.0423790449114384
1439	11 vs. 46	2	0.9845	0.979	0.0837	0.8966	0.3958	2	0.98733412244898	0.985032326530612	0.0720954285714286	0.92485012244898	0.374998775510204	2	0.0100464514953486	0.0123890461273489	0.0270997599415362	0.0467822755882719	0.0481111504828868
1440	11 vs. 46	3	0.4859	0.5739	0.2917	0.1739	0.5208	3	0.755337551020408	0.757762775510204	0.185275510204082	0.653356163265306	0.506666612244898	3	0.215412445918853	0.212311770503312	0.0832591056930451	0.204524859292461	0.0496309945955463
1441	11 vs. 47	1	0.9704	0.9705	0.0831	0.9375	0.3333	1	0.89884612244898	0.903832	0.13500693877551	0.853011102040816	0.389999673469388	1	0.102650607765256	0.100856964519843	0.0636681222951117	0.130103373143979	0.0423790449114384
1442	11 vs. 47	2	0.9916	0.9889	0.0633	0.9333	0.375	2	0.98733412244898	0.985032326530612	0.0720954285714286	0.92485012244898	0.374998775510204	2	0.0100464514953486	0.0123890461273489	0.0270997599415362	0.0467822755882719	0.0481111504828868
1443	11 vs. 47	3	0.981	0.9783	0.059	0.9231	0.4583	3	0.755337551020408	0.757762775510204	0.185275510204082	0.653356163265306	0.506666612244898	3	0.215412445918853	0.212311770503312	0.0832591056930451	0.204524859292461	0.0496309945955463
1444	11 vs. 48	1	0.9529	0.9526	0.1032	0.8387	0.3542	1	0.89884612244898	0.903832	0.13500693877551	0.853011102040816	0.389999673469388	1	0.102650607765256	0.100856964519843	0.0636681222951117	0.130103373143979	0.0423790449114384
1445	11 vs. 48	2	0.9906	0.9872	0.0655	0.963	0.4375	2	0.98733412244898	0.985032326530612	0.0720954285714286	0.92485012244898	0.374998775510204	2	0.0100464514953486	0.0123890461273489	0.0270997599415362	0.0467822755882719	0.0481111504828868
1446	11 vs. 48	3	0.823	0.8886	0.1736	0.5714	0.5625	3	0.755337551020408	0.757762775510204	0.185275510204082	0.653356163265306	0.506666612244898	3	0.215412445918853	0.212311770503312	0.0832591056930451	0.204524859292461	0.0496309945955463
1447	11 vs. 49	1	0.9388	0.9404	0.1222	1	0.375	1	0.89884612244898	0.903832	0.13500693877551	0.853011102040816	0.389999673469388	1	0.102650607765256	0.100856964519843	0.0636681222951117	0.130103373143979	0.0423790449114384
1448	11 vs. 49	2	0.9922	0.99	0.0614	0.9333	0.375	2	0.98733412244898	0.985032326530612	0.0720954285714286	0.92485012244898	0.374998775510204	2	0.0100464514953486	0.0123890461273489	0.0270997599415362	0.0467822755882719	0.0481111504828868
1449	11 vs. 49	3	0.9631	0.9585	0.0835	0.88	0.4792	3	0.755337551020408	0.757762775510204	0.185275510204082	0.653356163265306	0.506666612244898	3	0.215412445918853	0.212311770503312	0.0832591056930451	0.204524859292461	0.0496309945955463
1450	11 vs. 50	1	0.914	0.9263	0.1388	0.8	0.375	1	0.89884612244898	0.903832	0.13500693877551	0.853011102040816	0.389999673469388	1	0.102650607765256	0.100856964519843	0.0636681222951117	0.130103373143979	0.0423790449114384
1451	11 vs. 50	2	0.9918	0.9905	0.0611	0.963	0.4375	2	0.98733412244898	0.985032326530612	0.0720954285714286	0.92485012244898	0.374998775510204	2	0.0100464514953486	0.0123890461273489	0.0270997599415362	0.0467822755882719	0.0481111504828868
1452	11 vs. 50	3	0.8956	0.9017	0.1361	0.7586	0.3958	3	0.755337551020408	0.757762775510204	0.185275510204082	0.653356163265306	0.506666612244898	3	0.215412445918853	0.212311770503312	0.0832591056930451	0.204524859292461	0.0496309945955463
1453	12 vs. 13	1	0.7704	0.7695	0.2271	0.8	0.375	1	0.89884612244898	0.903832	0.13500693877551	0.853011102040816	0.389999673469388	1	0.102650607765256	0.100856964519843	0.0636681222951117	0.130103373143979	0.0423790449114384
1454	12 vs. 13	2	0.9825	0.9778	0.0909	0.8667	0.375	2	0.98733412244898	0.985032326530612	0.0720954285714286	0.92485012244898	0.374998775510204	2	0.0100464514953486	0.0123890461273489	0.0270997599415362	0.0467822755882719	0.0481111504828868
1455	12 vs. 13	3	0.8114	0.7878	0.1875	0.72	0.4792	3	0.755337551020408	0.757762775510204	0.185275510204082	0.653356163265306	0.506666612244898	3	0.215412445918853	0.212311770503312	0.0832591056930451	0.204524859292461	0.0496309945955463
1456	12 vs. 14	1	0.9803	0.9815	0.0695	0.9286	0.4167	1	0.89884612244898	0.903832	0.13500693877551	0.853011102040816	0.389999673469388	1	0.102650607765256	0.100856964519843	0.0636681222951117	0.130103373143979	0.0423790449114384
1457	12 vs. 14	2	0.9932	0.9932	0.0566	0.9375	0.3333	2	0.98733412244898	0.985032326530612	0.0720954285714286	0.92485012244898	0.374998775510204	2	0.0100464514953486	0.0123890461273489	0.0270997599415362	0.0467822755882719	0.0481111504828868
1458	12 vs. 14	3	0.9176	0.9113	0.1212	0.64	0.4792	3	0.755337551020408	0.757762775510204	0.185275510204082	0.653356163265306	0.506666612244898	3	0.215412445918853	0.212311770503312	0.0832591056930451	0.204524859292461	0.0496309945955463
1459	12 vs. 15	1	0.9452	0.9457	0.1146	0.8667	0.375	1	0.89884612244898	0.903832	0.13500693877551	0.853011102040816	0.389999673469388	1	0.102650607765256	0.100856964519843	0.0636681222951117	0.130103373143979	0.0423790449114384
1460	12 vs. 15	2	0.9917	0.9911	0.0627	0.9375	0.3333	2	0.98733412244898	0.985032326530612	0.0720954285714286	0.92485012244898	0.374998775510204	2	0.0100464514953486	0.0123890461273489	0.0270997599415362	0.0467822755882719	0.0481111504828868
1461	12 vs. 15	3	0.9228	0.9147	0.1177	0.6923	0.4583	3	0.755337551020408	0.757762775510204	0.185275510204082	0.653356163265306	0.506666612244898	3	0.215412445918853	0.212311770503312	0.0832591056930451	0.204524859292461	0.0496309945955463
1462	12 vs. 16	1	0.8538	0.8824	0.1857	0.6667	0.4375	1	0.89884612244898	0.903832	0.13500693877551	0.853011102040816	0.389999673469388	1	0.102650607765256	0.100856964519843	0.0636681222951117	0.130103373143979	0.0423790449114384
1463	12 vs. 16	2	0.9823	0.9885	0.0911	0.8387	0.3542	2	0.98733412244898	0.985032326530612	0.0720954285714286	0.92485012244898	0.374998775510204	2	0.0100464514953486	0.0123890461273489	0.0270997599415362	0.0467822755882719	0.0481111504828868
1464	12 vs. 16	3	0.5239	0.5694	0.286	0.4444	0.4375	3	0.755337551020408	0.757762775510204	0.185275510204082	0.653356163265306	0.506666612244898	3	0.215412445918853	0.212311770503312	0.0832591056930451	0.204524859292461	0.0496309945955463
1465	12 vs. 17	1	0.971	0.9736	0.0839	0.8966	0.3958	1	0.89884612244898	0.903832	0.13500693877551	0.853011102040816	0.389999673469388	1	0.102650607765256	0.100856964519843	0.0636681222951117	0.130103373143979	0.0423790449114384
1466	12 vs. 17	2	0.9932	0.9937	0.0567	0.9375	0.3333	2	0.98733412244898	0.985032326530612	0.0720954285714286	0.92485012244898	0.374998775510204	2	0.0100464514953486	0.0123890461273489	0.0270997599415362	0.0467822755882719	0.0481111504828868
1467	12 vs. 17	3	0.8787	0.8634	0.1534	0.8333	0.5	3	0.755337551020408	0.757762775510204	0.185275510204082	0.653356163265306	0.506666612244898	3	0.215412445918853	0.212311770503312	0.0832591056930451	0.204524859292461	0.0496309945955463
1468	12 vs. 18	1	0.9135	0.9308	0.1442	0.8	0.375	1	0.89884612244898	0.903832	0.13500693877551	0.853011102040816	0.389999673469388	1	0.102650607765256	0.100856964519843	0.0636681222951117	0.130103373143979	0.0423790449114384
1469	12 vs. 18	2	0.9906	0.9944	0.0667	0.9375	0.3333	2	0.98733412244898	0.985032326530612	0.0720954285714286	0.92485012244898	0.374998775510204	2	0.0100464514953486	0.0123890461273489	0.0270997599415362	0.0467822755882719	0.0481111504828868
1470	12 vs. 18	3	0.9189	0.9249	0.1202	0.7692	0.4583	3	0.755337551020408	0.757762775510204	0.185275510204082	0.653356163265306	0.506666612244898	3	0.215412445918853	0.212311770503312	0.0832591056930451	0.204524859292461	0.0496309945955463
1471	12 vs. 19	1	0.9343	0.9389	0.1252	0.8	0.375	1	0.89884612244898	0.903832	0.13500693877551	0.853011102040816	0.389999673469388	1	0.102650607765256	0.100856964519843	0.0636681222951117	0.130103373143979	0.0423790449114384
1472	12 vs. 19	2	0.9918	0.9915	0.0621	0.9375	0.3333	2	0.98733412244898	0.985032326530612	0.0720954285714286	0.92485012244898	0.374998775510204	2	0.0100464514953486	0.0123890461273489	0.0270997599415362	0.0467822755882719	0.0481111504828868
1473	12 vs. 19	3	0.9352	0.9271	0.1086	0.7407	0.4375	3	0.755337551020408	0.757762775510204	0.185275510204082	0.653356163265306	0.506666612244898	3	0.215412445918853	0.212311770503312	0.0832591056930451	0.204524859292461	0.0496309945955463
1474	12 vs. 20	1	0.9315	0.9466	0.1277	0.7692	0.4583	1	0.89884612244898	0.903832	0.13500693877551	0.853011102040816	0.389999673469388	1	0.102650607765256	0.100856964519843	0.0636681222951117	0.130103373143979	0.0423790449114384
1475	12 vs. 20	2	0.9843	0.9868	0.086	0.8667	0.375	2	0.98733412244898	0.985032326530612	0.0720954285714286	0.92485012244898	0.374998775510204	2	0.0100464514953486	0.0123890461273489	0.0270997599415362	0.0467822755882719	0.0481111504828868
1476	12 vs. 20	3	0.9499	0.9459	0.0952	0.7826	0.5208	3	0.755337551020408	0.757762775510204	0.185275510204082	0.653356163265306	0.506666612244898	3	0.215412445918853	0.212311770503312	0.0832591056930451	0.204524859292461	0.0496309945955463
1477	12 vs. 21	1	0.9673	0.9666	0.089	0.8966	0.3958	1	0.89884612244898	0.903832	0.13500693877551	0.853011102040816	0.389999673469388	1	0.102650607765256	0.100856964519843	0.0636681222951117	0.130103373143979	0.0423790449114384
1478	12 vs. 21	2	0.9926	0.9921	0.0595	0.9444	0.25	2	0.98733412244898	0.985032326530612	0.0720954285714286	0.92485012244898	0.374998775510204	2	0.0100464514953486	0.0123890461273489	0.0270997599415362	0.0467822755882719	0.0481111504828868
1479	12 vs. 21	3	0.5213	0.5527	0.277	0.4	0.4792	3	0.755337551020408	0.757762775510204	0.185275510204082	0.653356163265306	0.506666612244898	3	0.215412445918853	0.212311770503312	0.0832591056930451	0.204524859292461	0.0496309945955463
1480	12 vs. 22	1	0.9649	0.9765	0.0922	0.8571	0.4167	1	0.89884612244898	0.903832	0.13500693877551	0.853011102040816	0.389999673469388	1	0.102650607765256	0.100856964519843	0.0636681222951117	0.130103373143979	0.0423790449114384
1481	12 vs. 22	2	0.9927	0.9945	0.0587	0.9697	0.3125	2	0.98733412244898	0.985032326530612	0.0720954285714286	0.92485012244898	0.374998775510204	2	0.0100464514953486	0.0123890461273489	0.0270997599415362	0.0467822755882719	0.0481111504828868
1482	12 vs. 22	3	0.9423	0.9432	0.1019	0.8333	0.5	3	0.755337551020408	0.757762775510204	0.185275510204082	0.653356163265306	0.506666612244898	3	0.215412445918853	0.212311770503312	0.0832591056930451	0.204524859292461	0.0496309945955463
1483	12 vs. 23	1	0.9038	0.9078	0.1506	0.8387	0.3542	1	0.89884612244898	0.903832	0.13500693877551	0.853011102040816	0.389999673469388	1	0.102650607765256	0.100856964519843	0.0636681222951117	0.130103373143979	0.0423790449114384
1484	12 vs. 23	2	0.9899	0.9921	0.069	0.8667	0.375	2	0.98733412244898	0.985032326530612	0.0720954285714286	0.92485012244898	0.374998775510204	2	0.0100464514953486	0.0123890461273489	0.0270997599415362	0.0467822755882719	0.0481111504828868
1485	12 vs. 23	3	0.9812	0.9801	0.0589	0.88	0.4792	3	0.755337551020408	0.757762775510204	0.185275510204082	0.653356163265306	0.506666612244898	3	0.215412445918853	0.212311770503312	0.0832591056930451	0.204524859292461	0.0496309945955463
1486	12 vs. 24	1	0.9871	0.9898	0.0565	0.8966	0.3958	1	0.89884612244898	0.903832	0.13500693877551	0.853011102040816	0.389999673469388	1	0.102650607765256	0.100856964519843	0.0636681222951117	0.130103373143979	0.0423790449114384
1487	12 vs. 24	2	0.9941	0.995	0.0527	0.9697	0.3125	2	0.98733412244898	0.985032326530612	0.0720954285714286	0.92485012244898	0.374998775510204	2	0.0100464514953486	0.0123890461273489	0.0270997599415362	0.0467822755882719	0.0481111504828868
1488	12 vs. 24	3	0.8839	0.8702	0.1481	0.8333	0.5	3	0.755337551020408	0.757762775510204	0.185275510204082	0.653356163265306	0.506666612244898	3	0.215412445918853	0.212311770503312	0.0832591056930451	0.204524859292461	0.0496309945955463
1489	12 vs. 25	1	0.976	0.9838	0.0765	0.8966	0.3958	1	0.89884612244898	0.903832	0.13500693877551	0.853011102040816	0.389999673469388	1	0.102650607765256	0.100856964519843	0.0636681222951117	0.130103373143979	0.0423790449114384
1490	12 vs. 25	2	0.9934	0.9916	0.0558	0.9697	0.3125	2	0.98733412244898	0.985032326530612	0.0720954285714286	0.92485012244898	0.374998775510204	2	0.0100464514953486	0.0123890461273489	0.0270997599415362	0.0467822755882719	0.0481111504828868
1491	12 vs. 25	3	0.8373	0.8669	0.1666	0.6087	0.5208	3	0.755337551020408	0.757762775510204	0.185275510204082	0.653356163265306	0.506666612244898	3	0.215412445918853	0.212311770503312	0.0832591056930451	0.204524859292461	0.0496309945955463
1492	12 vs. 26	1	0.9549	0.9566	0.1047	0.8667	0.375	1	0.89884612244898	0.903832	0.13500693877551	0.853011102040816	0.389999673469388	1	0.102650607765256	0.100856964519843	0.0636681222951117	0.130103373143979	0.0423790449114384
1493	12 vs. 26	2	0.9933	0.993	0.0563	0.9032	0.3542	2	0.98733412244898	0.985032326530612	0.0720954285714286	0.92485012244898	0.374998775510204	2	0.0100464514953486	0.0123890461273489	0.0270997599415362	0.0467822755882719	0.0481111504828868
1494	12 vs. 26	3	0.9831	0.9833	0.0574	0.8333	0.5	3	0.755337551020408	0.757762775510204	0.185275510204082	0.653356163265306	0.506666612244898	3	0.215412445918853	0.212311770503312	0.0832591056930451	0.204524859292461	0.0496309945955463
1495	12 vs. 27	1	0.8379	0.8526	0.1954	0.75	0.3333	1	0.89884612244898	0.903832	0.13500693877551	0.853011102040816	0.389999673469388	1	0.102650607765256	0.100856964519843	0.0636681222951117	0.130103373143979	0.0423790449114384
1496	12 vs. 27	2	0.9898	0.9893	0.0694	0.9032	0.3542	2	0.98733412244898	0.985032326530612	0.0720954285714286	0.92485012244898	0.374998775510204	2	0.0100464514953486	0.0123890461273489	0.0270997599415362	0.0467822755882719	0.0481111504828868
1497	12 vs. 27	3	0.7006	0.7223	0.224	0.5833	0.5	3	0.755337551020408	0.757762775510204	0.185275510204082	0.653356163265306	0.506666612244898	3	0.215412445918853	0.212311770503312	0.0832591056930451	0.204524859292461	0.0496309945955463
1498	12 vs. 28	1	0.9289	0.9375	0.1305	0.8462	0.4583	1	0.89884612244898	0.903832	0.13500693877551	0.853011102040816	0.389999673469388	1	0.102650607765256	0.100856964519843	0.0636681222951117	0.130103373143979	0.0423790449114384
1499	12 vs. 28	2	0.9953	0.9965	0.047	0.9375	0.3333	2	0.98733412244898	0.985032326530612	0.0720954285714286	0.92485012244898	0.374998775510204	2	0.0100464514953486	0.0123890461273489	0.0270997599415362	0.0467822755882719	0.0481111504828868
1500	12 vs. 28	3	0.853	0.8443	0.1616	0.75	0.5	3	0.755337551020408	0.757762775510204	0.185275510204082	0.653356163265306	0.506666612244898	3	0.215412445918853	0.212311770503312	0.0832591056930451	0.204524859292461	0.0496309945955463
1501	12 vs. 29	1	0.8494	0.8633	0.1874	0.7857	0.4167	1	0.89884612244898	0.903832	0.13500693877551	0.853011102040816	0.389999673469388	1	0.102650607765256	0.100856964519843	0.0636681222951117	0.130103373143979	0.0423790449114384
1502	12 vs. 29	2	0.9746	0.9745	0.109	0.8667	0.375	2	0.98733412244898	0.985032326530612	0.0720954285714286	0.92485012244898	0.374998775510204	2	0.0100464514953486	0.0123890461273489	0.0270997599415362	0.0467822755882719	0.0481111504828868
1503	12 vs. 29	3	0.9859	0.9845	0.0508	0.88	0.4792	3	0.755337551020408	0.757762775510204	0.185275510204082	0.653356163265306	0.506666612244898	3	0.215412445918853	0.212311770503312	0.0832591056930451	0.204524859292461	0.0496309945955463
1504	12 vs. 30	1	0.9818	0.9813	0.0667	1	0.4167	1	0.89884612244898	0.903832	0.13500693877551	0.853011102040816	0.389999673469388	1	0.102650607765256	0.100856964519843	0.0636681222951117	0.130103373143979	0.0423790449114384
1505	12 vs. 30	2	0.9978	0.9975	0.0325	1	0.2917	2	0.98733412244898	0.985032326530612	0.0720954285714286	0.92485012244898	0.374998775510204	2	0.0100464514953486	0.0123890461273489	0.0270997599415362	0.0467822755882719	0.0481111504828868
1506	12 vs. 30	3	0.6776	0.6599	0.2336	0.5455	0.5417	3	0.755337551020408	0.757762775510204	0.185275510204082	0.653356163265306	0.506666612244898	3	0.215412445918853	0.212311770503312	0.0832591056930451	0.204524859292461	0.0496309945955463
1507	12 vs. 31	1	0.9232	0.9231	0.135	0.8571	0.4167	1	0.89884612244898	0.903832	0.13500693877551	0.853011102040816	0.389999673469388	1	0.102650607765256	0.100856964519843	0.0636681222951117	0.130103373143979	0.0423790449114384
1508	12 vs. 31	2	0.9934	0.992	0.056	0.9032	0.3542	2	0.98733412244898	0.985032326530612	0.0720954285714286	0.92485012244898	0.374998775510204	2	0.0100464514953486	0.0123890461273489	0.0270997599415362	0.0467822755882719	0.0481111504828868
1509	12 vs. 31	3	0.933	0.9283	0.1116	0.7692	0.4583	3	0.755337551020408	0.757762775510204	0.185275510204082	0.653356163265306	0.506666612244898	3	0.215412445918853	0.212311770503312	0.0832591056930451	0.204524859292461	0.0496309945955463
1510	12 vs. 32	1	0.9874	0.9874	0.0564	0.9286	0.4167	1	0.89884612244898	0.903832	0.13500693877551	0.853011102040816	0.389999673469388	1	0.102650607765256	0.100856964519843	0.0636681222951117	0.130103373143979	0.0423790449114384
1511	12 vs. 32	2	0.9988	0.9985	0.0235	0.9697	0.3125	2	0.98733412244898	0.985032326530612	0.0720954285714286	0.92485012244898	0.374998775510204	2	0.0100464514953486	0.0123890461273489	0.0270997599415362	0.0467822755882719	0.0481111504828868
1512	12 vs. 32	3	0.9621	0.9622	0.0839	0.8	0.4792	3	0.755337551020408	0.757762775510204	0.185275510204082	0.653356163265306	0.506666612244898	3	0.215412445918853	0.212311770503312	0.0832591056930451	0.204524859292461	0.0496309945955463
1513	12 vs. 33	1	0.6077	0.6342	0.2966	0.48	0.4792	1	0.89884612244898	0.903832	0.13500693877551	0.853011102040816	0.389999673469388	1	0.102650607765256	0.100856964519843	0.0636681222951117	0.130103373143979	0.0423790449114384
1514	12 vs. 33	2	0.9742	0.9741	0.1098	0.8667	0.375	2	0.98733412244898	0.985032326530612	0.0720954285714286	0.92485012244898	0.374998775510204	2	0.0100464514953486	0.0123890461273489	0.0270997599415362	0.0467822755882719	0.0481111504828868
1515	12 vs. 33	3	0.8645	0.8603	0.1532	0.56	0.4792	3	0.755337551020408	0.757762775510204	0.185275510204082	0.653356163265306	0.506666612244898	3	0.215412445918853	0.212311770503312	0.0832591056930451	0.204524859292461	0.0496309945955463
1516	12 vs. 34	1	0.9863	0.9862	0.0579	0.8571	0.4167	1	0.89884612244898	0.903832	0.13500693877551	0.853011102040816	0.389999673469388	1	0.102650607765256	0.100856964519843	0.0636681222951117	0.130103373143979	0.0423790449114384
1517	12 vs. 34	2	0.9962	0.9962	0.0423	0.9375	0.3333	2	0.98733412244898	0.985032326530612	0.0720954285714286	0.92485012244898	0.374998775510204	2	0.0100464514953486	0.0123890461273489	0.0270997599415362	0.0467822755882719	0.0481111504828868
1518	12 vs. 34	3	0.929	0.92	0.1127	0.64	0.4792	3	0.755337551020408	0.757762775510204	0.185275510204082	0.653356163265306	0.506666612244898	3	0.215412445918853	0.212311770503312	0.0832591056930451	0.204524859292461	0.0496309945955463
1519	12 vs. 35	1	0.9633	0.9707	0.0944	0.8	0.375	1	0.89884612244898	0.903832	0.13500693877551	0.853011102040816	0.389999673469388	1	0.102650607765256	0.100856964519843	0.0636681222951117	0.130103373143979	0.0423790449114384
1520	12 vs. 35	2	0.9961	0.9955	0.0431	0.9697	0.3125	2	0.98733412244898	0.985032326530612	0.0720954285714286	0.92485012244898	0.374998775510204	2	0.0100464514953486	0.0123890461273489	0.0270997599415362	0.0467822755882719	0.0481111504828868
1521	12 vs. 35	3	0.9757	0.9775	0.067	0.88	0.4792	3	0.755337551020408	0.757762775510204	0.185275510204082	0.653356163265306	0.506666612244898	3	0.215412445918853	0.212311770503312	0.0832591056930451	0.204524859292461	0.0496309945955463
1522	12 vs. 36	1	0.9895	0.9892	0.0509	0.9333	0.375	1	0.89884612244898	0.903832	0.13500693877551	0.853011102040816	0.389999673469388	1	0.102650607765256	0.100856964519843	0.0636681222951117	0.130103373143979	0.0423790449114384
1523	12 vs. 36	2	0.9965	0.9956	0.0405	0.9714	0.2708	2	0.98733412244898	0.985032326530612	0.0720954285714286	0.92485012244898	0.374998775510204	2	0.0100464514953486	0.0123890461273489	0.0270997599415362	0.0467822755882719	0.0481111504828868
1524	12 vs. 36	3	0.8995	0.8881	0.1349	0.7826	0.5208	3	0.755337551020408	0.757762775510204	0.185275510204082	0.653356163265306	0.506666612244898	3	0.215412445918853	0.212311770503312	0.0832591056930451	0.204524859292461	0.0496309945955463
1525	12 vs. 37	1	0.8689	0.8865	0.176	0.8	0.375	1	0.89884612244898	0.903832	0.13500693877551	0.853011102040816	0.389999673469388	1	0.102650607765256	0.100856964519843	0.0636681222951117	0.130103373143979	0.0423790449114384
1526	12 vs. 37	2	0.9838	0.9869	0.0873	0.8667	0.375	2	0.98733412244898	0.985032326530612	0.0720954285714286	0.92485012244898	0.374998775510204	2	0.0100464514953486	0.0123890461273489	0.0270997599415362	0.0467822755882719	0.0481111504828868
1527	12 vs. 37	3	0.9396	0.9332	0.1041	0.7692	0.4583	3	0.755337551020408	0.757762775510204	0.185275510204082	0.653356163265306	0.506666612244898	3	0.215412445918853	0.212311770503312	0.0832591056930451	0.204524859292461	0.0496309945955463
1528	12 vs. 38	1	0.9497	0.953	0.11	0.8966	0.3958	1	0.89884612244898	0.903832	0.13500693877551	0.853011102040816	0.389999673469388	1	0.102650607765256	0.100856964519843	0.0636681222951117	0.130103373143979	0.0423790449114384
1529	12 vs. 38	2	0.9985	0.9983	0.0263	1	0.2917	2	0.98733412244898	0.985032326530612	0.0720954285714286	0.92485012244898	0.374998775510204	2	0.0100464514953486	0.0123890461273489	0.0270997599415362	0.0467822755882719	0.0481111504828868
1530	12 vs. 38	3	0.8954	0.9096	0.1354	0.6957	0.5208	3	0.755337551020408	0.757762775510204	0.185275510204082	0.653356163265306	0.506666612244898	3	0.215412445918853	0.212311770503312	0.0832591056930451	0.204524859292461	0.0496309945955463
1531	12 vs. 39	1	0.9602	0.9683	0.0982	0.8966	0.3958	1	0.89884612244898	0.903832	0.13500693877551	0.853011102040816	0.389999673469388	1	0.102650607765256	0.100856964519843	0.0636681222951117	0.130103373143979	0.0423790449114384
1532	12 vs. 39	2	0.9905	0.9888	0.0671	0.9697	0.3125	2	0.98733412244898	0.985032326530612	0.0720954285714286	0.92485012244898	0.374998775510204	2	0.0100464514953486	0.0123890461273489	0.0270997599415362	0.0467822755882719	0.0481111504828868
1533	12 vs. 39	3	0.6351	0.5791	0.259	0.6667	0.5	3	0.755337551020408	0.757762775510204	0.185275510204082	0.653356163265306	0.506666612244898	3	0.215412445918853	0.212311770503312	0.0832591056930451	0.204524859292461	0.0496309945955463
1534	12 vs. 40	1	0.9796	0.9821	0.0709	0.8966	0.3958	1	0.89884612244898	0.903832	0.13500693877551	0.853011102040816	0.389999673469388	1	0.102650607765256	0.100856964519843	0.0636681222951117	0.130103373143979	0.0423790449114384
1535	12 vs. 40	2	0.9949	0.9939	0.0491	0.9143	0.2708	2	0.98733412244898	0.985032326530612	0.0720954285714286	0.92485012244898	0.374998775510204	2	0.0100464514953486	0.0123890461273489	0.0270997599415362	0.0467822755882719	0.0481111504828868
1536	12 vs. 40	3	0.9726	0.97	0.0712	0.8333	0.5	3	0.755337551020408	0.757762775510204	0.185275510204082	0.653356163265306	0.506666612244898	3	0.215412445918853	0.212311770503312	0.0832591056930451	0.204524859292461	0.0496309945955463
1537	12 vs. 41	1	0.9898	0.9897	0.05	0.8966	0.3958	1	0.89884612244898	0.903832	0.13500693877551	0.853011102040816	0.389999673469388	1	0.102650607765256	0.100856964519843	0.0636681222951117	0.130103373143979	0.0423790449114384
1538	12 vs. 41	2	0.9973	0.9967	0.0356	0.9375	0.3333	2	0.98733412244898	0.985032326530612	0.0720954285714286	0.92485012244898	0.374998775510204	2	0.0100464514953486	0.0123890461273489	0.0270997599415362	0.0467822755882719	0.0481111504828868
1539	12 vs. 41	3	0.9727	0.9693	0.0707	0.7407	0.4375	3	0.755337551020408	0.757762775510204	0.185275510204082	0.653356163265306	0.506666612244898	3	0.215412445918853	0.212311770503312	0.0832591056930451	0.204524859292461	0.0496309945955463
1540	12 vs. 42	1	0.8977	0.9012	0.1553	0.8148	0.4375	1	0.89884612244898	0.903832	0.13500693877551	0.853011102040816	0.389999673469388	1	0.102650607765256	0.100856964519843	0.0636681222951117	0.130103373143979	0.0423790449114384
1541	12 vs. 42	2	0.9862	0.9848	0.0806	0.9032	0.3542	2	0.98733412244898	0.985032326530612	0.0720954285714286	0.92485012244898	0.374998775510204	2	0.0100464514953486	0.0123890461273489	0.0270997599415362	0.0467822755882719	0.0481111504828868
1542	12 vs. 42	3	0.9301	0.9235	0.1119	0.8333	0.5	3	0.755337551020408	0.757762775510204	0.185275510204082	0.653356163265306	0.506666612244898	3	0.215412445918853	0.212311770503312	0.0832591056930451	0.204524859292461	0.0496309945955463
1543	12 vs. 43	1	0.9641	0.972	0.0932	0.8571	0.4167	1	0.89884612244898	0.903832	0.13500693877551	0.853011102040816	0.389999673469388	1	0.102650607765256	0.100856964519843	0.0636681222951117	0.130103373143979	0.0423790449114384
1544	12 vs. 43	2	0.994	0.9931	0.0536	0.9697	0.3125	2	0.98733412244898	0.985032326530612	0.0720954285714286	0.92485012244898	0.374998775510204	2	0.0100464514953486	0.0123890461273489	0.0270997599415362	0.0467822755882719	0.0481111504828868
1545	12 vs. 43	3	0.9622	0.9604	0.0829	0.8462	0.4583	3	0.755337551020408	0.757762775510204	0.185275510204082	0.653356163265306	0.506666612244898	3	0.215412445918853	0.212311770503312	0.0832591056930451	0.204524859292461	0.0496309945955463
1546	12 vs. 44	1	0.583	0.5915	0.2999	0.48	0.4792	1	0.89884612244898	0.903832	0.13500693877551	0.853011102040816	0.389999673469388	1	0.102650607765256	0.100856964519843	0.0636681222951117	0.130103373143979	0.0423790449114384
1547	12 vs. 44	2	0.9864	0.9853	0.0802	0.8667	0.375	2	0.98733412244898	0.985032326530612	0.0720954285714286	0.92485012244898	0.374998775510204	2	0.0100464514953486	0.0123890461273489	0.0270997599415362	0.0467822755882719	0.0481111504828868
1548	12 vs. 44	3	0.9593	0.9542	0.0859	0.7407	0.4375	3	0.755337551020408	0.757762775510204	0.185275510204082	0.653356163265306	0.506666612244898	3	0.215412445918853	0.212311770503312	0.0832591056930451	0.204524859292461	0.0496309945955463
1549	12 vs. 45	1	0.9817	0.9811	0.0669	0.8276	0.3958	1	0.89884612244898	0.903832	0.13500693877551	0.853011102040816	0.389999673469388	1	0.102650607765256	0.100856964519843	0.0636681222951117	0.130103373143979	0.0423790449114384
1550	12 vs. 45	2	0.9959	0.995	0.0439	1	0.2917	2	0.98733412244898	0.985032326530612	0.0720954285714286	0.92485012244898	0.374998775510204	2	0.0100464514953486	0.0123890461273489	0.0270997599415362	0.0467822755882719	0.0481111504828868
1551	12 vs. 45	3	0.8582	0.8652	0.1652	0.7826	0.5208	3	0.755337551020408	0.757762775510204	0.185275510204082	0.653356163265306	0.506666612244898	3	0.215412445918853	0.212311770503312	0.0832591056930451	0.204524859292461	0.0496309945955463
1552	12 vs. 46	1	0.7062	0.7064	0.2553	0.7586	0.3958	1	0.89884612244898	0.903832	0.13500693877551	0.853011102040816	0.389999673469388	1	0.102650607765256	0.100856964519843	0.0636681222951117	0.130103373143979	0.0423790449114384
1553	12 vs. 46	2	0.9735	0.9672	0.1113	0.875	0.3333	2	0.98733412244898	0.985032326530612	0.0720954285714286	0.92485012244898	0.374998775510204	2	0.0100464514953486	0.0123890461273489	0.0270997599415362	0.0467822755882719	0.0481111504828868
1554	12 vs. 46	3	0.6235	0.6968	0.2504	0.3636	0.5417	3	0.755337551020408	0.757762775510204	0.185275510204082	0.653356163265306	0.506666612244898	3	0.215412445918853	0.212311770503312	0.0832591056930451	0.204524859292461	0.0496309945955463
1555	12 vs. 47	1	0.9676	0.9759	0.0887	0.8387	0.3542	1	0.89884612244898	0.903832	0.13500693877551	0.853011102040816	0.389999673469388	1	0.102650607765256	0.100856964519843	0.0636681222951117	0.130103373143979	0.0423790449114384
1556	12 vs. 47	2	0.9959	0.9957	0.044	0.9697	0.3125	2	0.98733412244898	0.985032326530612	0.0720954285714286	0.92485012244898	0.374998775510204	2	0.0100464514953486	0.0123890461273489	0.0270997599415362	0.0467822755882719	0.0481111504828868
1557	12 vs. 47	3	0.9238	0.9189	0.1178	0.88	0.4792	3	0.755337551020408	0.757762775510204	0.185275510204082	0.653356163265306	0.506666612244898	3	0.215412445918853	0.212311770503312	0.0832591056930451	0.204524859292461	0.0496309945955463
1558	12 vs. 48	1	0.8815	0.8839	0.166	0.7333	0.375	1	0.89884612244898	0.903832	0.13500693877551	0.853011102040816	0.389999673469388	1	0.102650607765256	0.100856964519843	0.0636681222951117	0.130103373143979	0.0423790449114384
1559	12 vs. 48	2	0.9761	0.9706	0.1057	0.8667	0.375	2	0.98733412244898	0.985032326530612	0.0720954285714286	0.92485012244898	0.374998775510204	2	0.0100464514953486	0.0123890461273489	0.0270997599415362	0.0467822755882719	0.0481111504828868
1560	12 vs. 48	3	0.8474	0.8907	0.1618	0.6	0.5833	3	0.755337551020408	0.757762775510204	0.185275510204082	0.653356163265306	0.506666612244898	3	0.215412445918853	0.212311770503312	0.0832591056930451	0.204524859292461	0.0496309945955463
1561	12 vs. 49	1	0.9897	0.9902	0.0506	0.8966	0.3958	1	0.89884612244898	0.903832	0.13500693877551	0.853011102040816	0.389999673469388	1	0.102650607765256	0.100856964519843	0.0636681222951117	0.130103373143979	0.0423790449114384
1562	12 vs. 49	2	0.9964	0.996	0.0416	0.9697	0.3125	2	0.98733412244898	0.985032326530612	0.0720954285714286	0.92485012244898	0.374998775510204	2	0.0100464514953486	0.0123890461273489	0.0270997599415362	0.0467822755882719	0.0481111504828868
1563	12 vs. 49	3	0.9445	0.9478	0.1023	0.8333	0.5	3	0.755337551020408	0.757762775510204	0.185275510204082	0.653356163265306	0.506666612244898	3	0.215412445918853	0.212311770503312	0.0832591056930451	0.204524859292461	0.0496309945955463
1564	12 vs. 50	1	0.7524	0.7836	0.2397	0.6897	0.3958	1	0.89884612244898	0.903832	0.13500693877551	0.853011102040816	0.389999673469388	1	0.102650607765256	0.100856964519843	0.0636681222951117	0.130103373143979	0.0423790449114384
1565	12 vs. 50	2	0.9734	0.9718	0.1116	0.8667	0.375	2	0.98733412244898	0.985032326530612	0.0720954285714286	0.92485012244898	0.374998775510204	2	0.0100464514953486	0.0123890461273489	0.0270997599415362	0.0467822755882719	0.0481111504828868
1566	12 vs. 50	3	0.9624	0.9655	0.0827	0.7857	0.4167	3	0.755337551020408	0.757762775510204	0.185275510204082	0.653356163265306	0.506666612244898	3	0.215412445918853	0.212311770503312	0.0832591056930451	0.204524859292461	0.0496309945955463
1567	13 vs. 14	1	0.8424	0.8408	0.1841	0.8667	0.375	1	0.89884612244898	0.903832	0.13500693877551	0.853011102040816	0.389999673469388	1	0.102650607765256	0.100856964519843	0.0636681222951117	0.130103373143979	0.0423790449114384
1568	13 vs. 14	2	0.9837	0.9791	0.0877	0.8571	0.4167	2	0.98733412244898	0.985032326530612	0.0720954285714286	0.92485012244898	0.374998775510204	2	0.0100464514953486	0.0123890461273489	0.0270997599415362	0.0467822755882719	0.0481111504828868
1569	13 vs. 14	3	0.7676	0.7087	0.2034	0.4167	0.5	3	0.755337551020408	0.757762775510204	0.185275510204082	0.653356163265306	0.506666612244898	3	0.215412445918853	0.212311770503312	0.0832591056930451	0.204524859292461	0.0496309945955463
1570	13 vs. 15	1	0.8617	0.8604	0.1702	0.875	0.3333	1	0.89884612244898	0.903832	0.13500693877551	0.853011102040816	0.389999673469388	1	0.102650607765256	0.100856964519843	0.0636681222951117	0.130103373143979	0.0423790449114384
1571	13 vs. 15	2	0.9918	0.9899	0.0621	0.9286	0.4167	2	0.98733412244898	0.985032326530612	0.0720954285714286	0.92485012244898	0.374998775510204	2	0.0100464514953486	0.0123890461273489	0.0270997599415362	0.0467822755882719	0.0481111504828868
1572	13 vs. 15	3	0.7763	0.7258	0.2005	0.48	0.4792	3	0.755337551020408	0.757762775510204	0.185275510204082	0.653356163265306	0.506666612244898	3	0.215412445918853	0.212311770503312	0.0832591056930451	0.204524859292461	0.0496309945955463
1573	13 vs. 16	1	0.8163	0.8274	0.1957	0.7586	0.3958	1	0.89884612244898	0.903832	0.13500693877551	0.853011102040816	0.389999673469388	1	0.102650607765256	0.100856964519843	0.0636681222951117	0.130103373143979	0.0423790449114384
1574	13 vs. 16	2	0.9776	0.9781	0.1023	0.8889	0.4375	2	0.98733412244898	0.985032326530612	0.0720954285714286	0.92485012244898	0.374998775510204	2	0.0100464514953486	0.0123890461273489	0.0270997599415362	0.0467822755882719	0.0481111504828868
1575	13 vs. 16	3	0.0633	0.0932	0.4021	0.0769	0.4583	3	0.755337551020408	0.757762775510204	0.185275510204082	0.653356163265306	0.506666612244898	3	0.215412445918853	0.212311770503312	0.0832591056930451	0.204524859292461	0.0496309945955463
1576	13 vs. 17	1	0.8417	0.84	0.1845	0.8387	0.3542	1	0.89884612244898	0.903832	0.13500693877551	0.853011102040816	0.389999673469388	1	0.102650607765256	0.100856964519843	0.0636681222951117	0.130103373143979	0.0423790449114384
1577	13 vs. 17	2	0.9807	0.9755	0.0951	0.9286	0.4167	2	0.98733412244898	0.985032326530612	0.0720954285714286	0.92485012244898	0.374998775510204	2	0.0100464514953486	0.0123890461273489	0.0270997599415362	0.0467822755882719	0.0481111504828868
1578	13 vs. 17	3	0.9176	0.9014	0.1269	0.7826	0.5208	3	0.755337551020408	0.757762775510204	0.185275510204082	0.653356163265306	0.506666612244898	3	0.215412445918853	0.212311770503312	0.0832591056930451	0.204524859292461	0.0496309945955463
1579	13 vs. 18	1	0.837	0.8412	0.1878	0.875	0.3333	1	0.89884612244898	0.903832	0.13500693877551	0.853011102040816	0.389999673469388	1	0.102650607765256	0.100856964519843	0.0636681222951117	0.130103373143979	0.0423790449114384
1580	13 vs. 18	2	0.9834	0.9819	0.0882	0.8571	0.4167	2	0.98733412244898	0.985032326530612	0.0720954285714286	0.92485012244898	0.374998775510204	2	0.0100464514953486	0.0123890461273489	0.0270997599415362	0.0467822755882719	0.0481111504828868
1581	13 vs. 18	3	0.6474	0.6462	0.2451	0.56	0.4792	3	0.755337551020408	0.757762775510204	0.185275510204082	0.653356163265306	0.506666612244898	3	0.215412445918853	0.212311770503312	0.0832591056930451	0.204524859292461	0.0496309945955463
1582	13 vs. 19	1	0.839	0.8378	0.1823	0.875	0.3333	1	0.89884612244898	0.903832	0.13500693877551	0.853011102040816	0.389999673469388	1	0.102650607765256	0.100856964519843	0.0636681222951117	0.130103373143979	0.0423790449114384
1583	13 vs. 19	2	0.9877	0.9846	0.076	0.8571	0.4167	2	0.98733412244898	0.985032326530612	0.0720954285714286	0.92485012244898	0.374998775510204	2	0.0100464514953486	0.0123890461273489	0.0270997599415362	0.0467822755882719	0.0481111504828868
1584	13 vs. 19	3	0.7705	0.7309	0.1983	0.6923	0.4583	3	0.755337551020408	0.757762775510204	0.185275510204082	0.653356163265306	0.506666612244898	3	0.215412445918853	0.212311770503312	0.0832591056930451	0.204524859292461	0.0496309945955463
1585	13 vs. 20	1	0.8537	0.8567	0.1723	0.7857	0.4167	1	0.89884612244898	0.903832	0.13500693877551	0.853011102040816	0.389999673469388	1	0.102650607765256	0.100856964519843	0.0636681222951117	0.130103373143979	0.0423790449114384
1586	13 vs. 20	2	0.9831	0.9821	0.089	0.9231	0.4583	2	0.98733412244898	0.985032326530612	0.0720954285714286	0.92485012244898	0.374998775510204	2	0.0100464514953486	0.0123890461273489	0.0270997599415362	0.0467822755882719	0.0481111504828868
1587	13 vs. 20	3	0.8289	0.8208	0.176	0.7273	0.5417	3	0.755337551020408	0.757762775510204	0.185275510204082	0.653356163265306	0.506666612244898	3	0.215412445918853	0.212311770503312	0.0832591056930451	0.204524859292461	0.0496309945955463
1588	13 vs. 21	1	0.7657	0.7672	0.2233	0.8387	0.3542	1	0.89884612244898	0.903832	0.13500693877551	0.853011102040816	0.389999673469388	1	0.102650607765256	0.100856964519843	0.0636681222951117	0.130103373143979	0.0423790449114384
1589	13 vs. 21	2	0.9757	0.9722	0.1076	0.8125	0.3333	2	0.98733412244898	0.985032326530612	0.0720954285714286	0.92485012244898	0.374998775510204	2	0.0100464514953486	0.0123890461273489	0.0270997599415362	0.0467822755882719	0.0481111504828868
1590	13 vs. 21	3	0.1829	0.2079	0.3613	0.1667	0.5	3	0.755337551020408	0.757762775510204	0.185275510204082	0.653356163265306	0.506666612244898	3	0.215412445918853	0.212311770503312	0.0832591056930451	0.204524859292461	0.0496309945955463
1591	13 vs. 22	1	0.8227	0.8236	0.1939	0.8	0.375	1	0.89884612244898	0.903832	0.13500693877551	0.853011102040816	0.389999673469388	1	0.102650607765256	0.100856964519843	0.0636681222951117	0.130103373143979	0.0423790449114384
1592	13 vs. 22	2	0.985	0.982	0.0839	0.8966	0.3958	2	0.98733412244898	0.985032326530612	0.0720954285714286	0.92485012244898	0.374998775510204	2	0.0100464514953486	0.0123890461273489	0.0270997599415362	0.0467822755882719	0.0481111504828868
1593	13 vs. 22	3	0.7813	0.7837	0.1964	0.7826	0.5208	3	0.755337551020408	0.757762775510204	0.185275510204082	0.653356163265306	0.506666612244898	3	0.215412445918853	0.212311770503312	0.0832591056930451	0.204524859292461	0.0496309945955463
1594	13 vs. 23	1	0.9055	0.9049	0.1399	0.9091	0.3125	1	0.89884612244898	0.903832	0.13500693877551	0.853011102040816	0.389999673469388	1	0.102650607765256	0.100856964519843	0.0636681222951117	0.130103373143979	0.0423790449114384
1595	13 vs. 23	2	0.9892	0.9886	0.0713	0.9231	0.4583	2	0.98733412244898	0.985032326530612	0.0720954285714286	0.92485012244898	0.374998775510204	2	0.0100464514953486	0.0123890461273489	0.0270997599415362	0.0467822755882719	0.0481111504828868
1596	13 vs. 23	3	0.8758	0.8542	0.1502	0.75	0.5	3	0.755337551020408	0.757762775510204	0.185275510204082	0.653356163265306	0.506666612244898	3	0.215412445918853	0.212311770503312	0.0832591056930451	0.204524859292461	0.0496309945955463
1597	13 vs. 24	1	0.8105	0.8085	0.208	0.8387	0.3542	1	0.89884612244898	0.903832	0.13500693877551	0.853011102040816	0.389999673469388	1	0.102650607765256	0.100856964519843	0.0636681222951117	0.130103373143979	0.0423790449114384
1598	13 vs. 24	2	0.986	0.9826	0.081	0.8966	0.3958	2	0.98733412244898	0.985032326530612	0.0720954285714286	0.92485012244898	0.374998775510204	2	0.0100464514953486	0.0123890461273489	0.0270997599415362	0.0467822755882719	0.0481111504828868
1599	13 vs. 24	3	0.9406	0.9278	0.1063	0.8696	0.5208	3	0.755337551020408	0.757762775510204	0.185275510204082	0.653356163265306	0.506666612244898	3	0.215412445918853	0.212311770503312	0.0832591056930451	0.204524859292461	0.0496309945955463
1600	13 vs. 25	1	0.8344	0.8339	0.1899	0.8387	0.3542	1	0.89884612244898	0.903832	0.13500693877551	0.853011102040816	0.389999673469388	1	0.102650607765256	0.100856964519843	0.0636681222951117	0.130103373143979	0.0423790449114384
1601	13 vs. 25	2	0.9916	0.9894	0.0632	0.8966	0.3958	2	0.98733412244898	0.985032326530612	0.0720954285714286	0.92485012244898	0.374998775510204	2	0.0100464514953486	0.0123890461273489	0.0270997599415362	0.0467822755882719	0.0481111504828868
1602	13 vs. 25	3	0.5476	0.5877	0.2744	0.3636	0.5417	3	0.755337551020408	0.757762775510204	0.185275510204082	0.653356163265306	0.506666612244898	3	0.215412445918853	0.212311770503312	0.0832591056930451	0.204524859292461	0.0496309945955463
1603	13 vs. 26	1	0.8531	0.8515	0.1807	0.875	0.3333	1	0.89884612244898	0.903832	0.13500693877551	0.853011102040816	0.389999673469388	1	0.102650607765256	0.100856964519843	0.0636681222951117	0.130103373143979	0.0423790449114384
1604	13 vs. 26	2	0.9884	0.9852	0.0739	0.963	0.4375	2	0.98733412244898	0.985032326530612	0.0720954285714286	0.92485012244898	0.374998775510204	2	0.0100464514953486	0.0123890461273489	0.0270997599415362	0.0467822755882719	0.0481111504828868
1605	13 vs. 26	3	0.8508	0.8206	0.1629	0.7826	0.5208	3	0.755337551020408	0.757762775510204	0.185275510204082	0.653356163265306	0.506666612244898	3	0.215412445918853	0.212311770503312	0.0832591056930451	0.204524859292461	0.0496309945955463
1606	13 vs. 27	1	0.8398	0.8434	0.1829	0.8824	0.2917	1	0.89884612244898	0.903832	0.13500693877551	0.853011102040816	0.389999673469388	1	0.102650607765256	0.100856964519843	0.0636681222951117	0.130103373143979	0.0423790449114384
1607	13 vs. 27	2	0.9817	0.9768	0.0928	0.8889	0.4375	2	0.98733412244898	0.985032326530612	0.0720954285714286	0.92485012244898	0.374998775510204	2	0.0100464514953486	0.0123890461273489	0.0270997599415362	0.0467822755882719	0.0481111504828868
1608	13 vs. 27	3	0.245	0.2459	0.3546	0.1739	0.5208	3	0.755337551020408	0.757762775510204	0.185275510204082	0.653356163265306	0.506666612244898	3	0.215412445918853	0.212311770503312	0.0832591056930451	0.204524859292461	0.0496309945955463
1609	13 vs. 28	1	0.7891	0.789	0.212	0.7143	0.4167	1	0.89884612244898	0.903832	0.13500693877551	0.853011102040816	0.389999673469388	1	0.102650607765256	0.100856964519843	0.0636681222951117	0.130103373143979	0.0423790449114384
1610	13 vs. 28	2	0.9748	0.9675	0.1091	0.8571	0.4167	2	0.98733412244898	0.985032326530612	0.0720954285714286	0.92485012244898	0.374998775510204	2	0.0100464514953486	0.0123890461273489	0.0270997599415362	0.0467822755882719	0.0481111504828868
1611	13 vs. 28	3	0.6281	0.6012	0.2574	0.4348	0.5208	3	0.755337551020408	0.757762775510204	0.185275510204082	0.653356163265306	0.506666612244898	3	0.215412445918853	0.212311770503312	0.0832591056930451	0.204524859292461	0.0496309945955463
1612	13 vs. 29	1	0.8144	0.8174	0.1942	0.8	0.375	1	0.89884612244898	0.903832	0.13500693877551	0.853011102040816	0.389999673469388	1	0.102650607765256	0.100856964519843	0.0636681222951117	0.130103373143979	0.0423790449114384
1613	13 vs. 29	2	0.9672	0.9609	0.1235	0.9231	0.4583	2	0.98733412244898	0.985032326530612	0.0720954285714286	0.92485012244898	0.374998775510204	2	0.0100464514953486	0.0123890461273489	0.0270997599415362	0.0467822755882719	0.0481111504828868
1614	13 vs. 29	3	0.7495	0.7187	0.2145	0.5833	0.5	3	0.755337551020408	0.757762775510204	0.185275510204082	0.653356163265306	0.506666612244898	3	0.215412445918853	0.212311770503312	0.0832591056930451	0.204524859292461	0.0496309945955463
1615	13 vs. 30	1	0.7548	0.7547	0.2319	0.8	0.375	1	0.89884612244898	0.903832	0.13500693877551	0.853011102040816	0.389999673469388	1	0.102650607765256	0.100856964519843	0.0636681222951117	0.130103373143979	0.0423790449114384
1616	13 vs. 30	2	0.9825	0.9788	0.0913	0.8667	0.375	2	0.98733412244898	0.985032326530612	0.0720954285714286	0.92485012244898	0.374998775510204	2	0.0100464514953486	0.0123890461273489	0.0270997599415362	0.0467822755882719	0.0481111504828868
1617	13 vs. 30	3	0.755	0.761	0.2053	0.6667	0.5625	3	0.755337551020408	0.757762775510204	0.185275510204082	0.653356163265306	0.506666612244898	3	0.215412445918853	0.212311770503312	0.0832591056930451	0.204524859292461	0.0496309945955463
1618	13 vs. 31	1	0.8176	0.8157	0.1934	0.8	0.375	1	0.89884612244898	0.903832	0.13500693877551	0.853011102040816	0.389999673469388	1	0.102650607765256	0.100856964519843	0.0636681222951117	0.130103373143979	0.0423790449114384
1619	13 vs. 31	2	0.986	0.9817	0.081	0.963	0.4375	2	0.98733412244898	0.985032326530612	0.0720954285714286	0.92485012244898	0.374998775510204	2	0.0100464514953486	0.0123890461273489	0.0270997599415362	0.0467822755882719	0.0481111504828868
1620	13 vs. 31	3	0.9436	0.9305	0.1027	0.8	0.4792	3	0.755337551020408	0.757762775510204	0.185275510204082	0.653356163265306	0.506666612244898	3	0.215412445918853	0.212311770503312	0.0832591056930451	0.204524859292461	0.0496309945955463
1621	13 vs. 32	1	0.7477	0.7481	0.2309	0.8667	0.375	1	0.89884612244898	0.903832	0.13500693877551	0.853011102040816	0.389999673469388	1	0.102650607765256	0.100856964519843	0.0636681222951117	0.130103373143979	0.0423790449114384
1622	13 vs. 32	2	0.9801	0.9743	0.0971	0.8276	0.3958	2	0.98733412244898	0.985032326530612	0.0720954285714286	0.92485012244898	0.374998775510204	2	0.0100464514953486	0.0123890461273489	0.0270997599415362	0.0467822755882719	0.0481111504828868
1623	13 vs. 32	3	0.7331	0.7196	0.2158	0.5833	0.5	3	0.755337551020408	0.757762775510204	0.185275510204082	0.653356163265306	0.506666612244898	3	0.215412445918853	0.212311770503312	0.0832591056930451	0.204524859292461	0.0496309945955463
1624	13 vs. 33	1	0.6947	0.7068	0.2437	0.6667	0.4375	1	0.89884612244898	0.903832	0.13500693877551	0.853011102040816	0.389999673469388	1	0.102650607765256	0.100856964519843	0.0636681222951117	0.130103373143979	0.0423790449114384
1625	13 vs. 33	2	0.9716	0.967	0.1152	0.9231	0.4583	2	0.98733412244898	0.985032326530612	0.0720954285714286	0.92485012244898	0.374998775510204	2	0.0100464514953486	0.0123890461273489	0.0270997599415362	0.0467822755882719	0.0481111504828868
1626	13 vs. 33	3	0.5787	0.5529	0.2676	0.3333	0.5	3	0.755337551020408	0.757762775510204	0.185275510204082	0.653356163265306	0.506666612244898	3	0.215412445918853	0.212311770503312	0.0832591056930451	0.204524859292461	0.0496309945955463
1627	13 vs. 34	1	0.7432	0.7407	0.2357	0.8	0.375	1	0.89884612244898	0.903832	0.13500693877551	0.853011102040816	0.389999673469388	1	0.102650607765256	0.100856964519843	0.0636681222951117	0.130103373143979	0.0423790449114384
1628	13 vs. 34	2	0.9822	0.9767	0.0915	0.8571	0.4167	2	0.98733412244898	0.985032326530612	0.0720954285714286	0.92485012244898	0.374998775510204	2	0.0100464514953486	0.0123890461273489	0.0270997599415362	0.0467822755882719	0.0481111504828868
1629	13 vs. 34	3	0.7815	0.7445	0.197	0.4167	0.5	3	0.755337551020408	0.757762775510204	0.185275510204082	0.653356163265306	0.506666612244898	3	0.215412445918853	0.212311770503312	0.0832591056930451	0.204524859292461	0.0496309945955463
1630	13 vs. 35	1	0.8164	0.8157	0.2004	0.875	0.3333	1	0.89884612244898	0.903832	0.13500693877551	0.853011102040816	0.389999673469388	1	0.102650607765256	0.100856964519843	0.0636681222951117	0.130103373143979	0.0423790449114384
1631	13 vs. 35	2	0.9849	0.9803	0.0848	0.8966	0.3958	2	0.98733412244898	0.985032326530612	0.0720954285714286	0.92485012244898	0.374998775510204	2	0.0100464514953486	0.0123890461273489	0.0270997599415362	0.0467822755882719	0.0481111504828868
1632	13 vs. 35	3	0.7297	0.7172	0.2199	0.6667	0.5	3	0.755337551020408	0.757762775510204	0.185275510204082	0.653356163265306	0.506666612244898	3	0.215412445918853	0.212311770503312	0.0832591056930451	0.204524859292461	0.0496309945955463
1633	13 vs. 36	1	0.7414	0.7392	0.2376	0.8125	0.3333	1	0.89884612244898	0.903832	0.13500693877551	0.853011102040816	0.389999673469388	1	0.102650607765256	0.100856964519843	0.0636681222951117	0.130103373143979	0.0423790449114384
1634	13 vs. 36	2	0.9775	0.9709	0.1032	0.8387	0.3542	2	0.98733412244898	0.985032326530612	0.0720954285714286	0.92485012244898	0.374998775510204	2	0.0100464514953486	0.0123890461273489	0.0270997599415362	0.0467822755882719	0.0481111504828868
1635	13 vs. 36	3	0.92	0.9027	0.1211	0.8182	0.5417	3	0.755337551020408	0.757762775510204	0.185275510204082	0.653356163265306	0.506666612244898	3	0.215412445918853	0.212311770503312	0.0832591056930451	0.204524859292461	0.0496309945955463
1636	13 vs. 37	1	0.8535	0.8584	0.1751	0.875	0.3333	1	0.89884612244898	0.903832	0.13500693877551	0.853011102040816	0.389999673469388	1	0.102650607765256	0.100856964519843	0.0636681222951117	0.130103373143979	0.0423790449114384
1637	13 vs. 37	2	0.9833	0.983	0.0884	0.9231	0.4583	2	0.98733412244898	0.985032326530612	0.0720954285714286	0.92485012244898	0.374998775510204	2	0.0100464514953486	0.0123890461273489	0.0270997599415362	0.0467822755882719	0.0481111504828868
1638	13 vs. 37	3	0.6733	0.6306	0.2396	0.4	0.4792	3	0.755337551020408	0.757762775510204	0.185275510204082	0.653356163265306	0.506666612244898	3	0.215412445918853	0.212311770503312	0.0832591056930451	0.204524859292461	0.0496309945955463
1639	13 vs. 38	1	0.8433	0.8418	0.1825	0.8387	0.3542	1	0.89884612244898	0.903832	0.13500693877551	0.853011102040816	0.389999673469388	1	0.102650607765256	0.100856964519843	0.0636681222951117	0.130103373143979	0.0423790449114384
1640	13 vs. 38	2	0.9858	0.9816	0.0821	0.8667	0.375	2	0.98733412244898	0.985032326530612	0.0720954285714286	0.92485012244898	0.374998775510204	2	0.0100464514953486	0.0123890461273489	0.0270997599415362	0.0467822755882719	0.0481111504828868
1641	13 vs. 38	3	0.5996	0.6124	0.261	0.4545	0.5417	3	0.755337551020408	0.757762775510204	0.185275510204082	0.653356163265306	0.506666612244898	3	0.215412445918853	0.212311770503312	0.0832591056930451	0.204524859292461	0.0496309945955463
1642	13 vs. 39	1	0.848	0.8478	0.1781	0.8387	0.3542	1	0.89884612244898	0.903832	0.13500693877551	0.853011102040816	0.389999673469388	1	0.102650607765256	0.100856964519843	0.0636681222951117	0.130103373143979	0.0423790449114384
1643	13 vs. 39	2	0.9833	0.9783	0.089	0.8966	0.3958	2	0.98733412244898	0.985032326530612	0.0720954285714286	0.92485012244898	0.374998775510204	2	0.0100464514953486	0.0123890461273489	0.0270997599415362	0.0467822755882719	0.0481111504828868
1644	13 vs. 39	3	0.8727	0.8416	0.1536	0.8696	0.5208	3	0.755337551020408	0.757762775510204	0.185275510204082	0.653356163265306	0.506666612244898	3	0.215412445918853	0.212311770503312	0.0832591056930451	0.204524859292461	0.0496309945955463
1645	13 vs. 40	1	0.7	0.7031	0.2583	0.8387	0.3542	1	0.89884612244898	0.903832	0.13500693877551	0.853011102040816	0.389999673469388	1	0.102650607765256	0.100856964519843	0.0636681222951117	0.130103373143979	0.0423790449114384
1646	13 vs. 40	2	0.9851	0.9822	0.0841	0.8387	0.3542	2	0.98733412244898	0.985032326530612	0.0720954285714286	0.92485012244898	0.374998775510204	2	0.0100464514953486	0.0123890461273489	0.0270997599415362	0.0467822755882719	0.0481111504828868
1647	13 vs. 40	3	0.8913	0.874	0.1424	0.7826	0.5208	3	0.755337551020408	0.757762775510204	0.185275510204082	0.653356163265306	0.506666612244898	3	0.215412445918853	0.212311770503312	0.0832591056930451	0.204524859292461	0.0496309945955463
1648	13 vs. 41	1	0.7961	0.7948	0.2116	0.8387	0.3542	1	0.89884612244898	0.903832	0.13500693877551	0.853011102040816	0.389999673469388	1	0.102650607765256	0.100856964519843	0.0636681222951117	0.130103373143979	0.0423790449114384
1649	13 vs. 41	2	0.9872	0.9834	0.0777	0.8571	0.4167	2	0.98733412244898	0.985032326530612	0.0720954285714286	0.92485012244898	0.374998775510204	2	0.0100464514953486	0.0123890461273489	0.0270997599415362	0.0467822755882719	0.0481111504828868
1650	13 vs. 41	3	0.7909	0.7617	0.1956	0.6154	0.4583	3	0.755337551020408	0.757762775510204	0.185275510204082	0.653356163265306	0.506666612244898	3	0.215412445918853	0.212311770503312	0.0832591056930451	0.204524859292461	0.0496309945955463
1651	13 vs. 42	1	0.8311	0.8298	0.1865	0.7586	0.3958	1	0.89884612244898	0.903832	0.13500693877551	0.853011102040816	0.389999673469388	1	0.102650607765256	0.100856964519843	0.0636681222951117	0.130103373143979	0.0423790449114384
1652	13 vs. 42	2	0.9804	0.9753	0.0958	0.963	0.4375	2	0.98733412244898	0.985032326530612	0.0720954285714286	0.92485012244898	0.374998775510204	2	0.0100464514953486	0.0123890461273489	0.0270997599415362	0.0467822755882719	0.0481111504828868
1653	13 vs. 42	3	0.8303	0.8203	0.1722	0.7826	0.5208	3	0.755337551020408	0.757762775510204	0.185275510204082	0.653356163265306	0.506666612244898	3	0.215412445918853	0.212311770503312	0.0832591056930451	0.204524859292461	0.0496309945955463
1654	13 vs. 43	1	0.8209	0.8204	0.1957	0.8	0.375	1	0.89884612244898	0.903832	0.13500693877551	0.853011102040816	0.389999673469388	1	0.102650607765256	0.100856964519843	0.0636681222951117	0.130103373143979	0.0423790449114384
1655	13 vs. 43	2	0.9863	0.9822	0.081	0.8966	0.3958	2	0.98733412244898	0.985032326530612	0.0720954285714286	0.92485012244898	0.374998775510204	2	0.0100464514953486	0.0123890461273489	0.0270997599415362	0.0467822755882719	0.0481111504828868
1656	13 vs. 43	3	0.8864	0.8621	0.144	0.72	0.4792	3	0.755337551020408	0.757762775510204	0.185275510204082	0.653356163265306	0.506666612244898	3	0.215412445918853	0.212311770503312	0.0832591056930451	0.204524859292461	0.0496309945955463
1657	13 vs. 44	1	0.7721	0.7746	0.205	0.6667	0.4375	1	0.89884612244898	0.903832	0.13500693877551	0.853011102040816	0.389999673469388	1	0.102650607765256	0.100856964519843	0.0636681222951117	0.130103373143979	0.0423790449114384
1658	13 vs. 44	2	0.9794	0.974	0.0986	0.9231	0.4583	2	0.98733412244898	0.985032326530612	0.0720954285714286	0.92485012244898	0.374998775510204	2	0.0100464514953486	0.0123890461273489	0.0270997599415362	0.0467822755882719	0.0481111504828868
1659	13 vs. 44	3	0.8807	0.8669	0.1466	0.6923	0.4583	3	0.755337551020408	0.757762775510204	0.185275510204082	0.653356163265306	0.506666612244898	3	0.215412445918853	0.212311770503312	0.0832591056930451	0.204524859292461	0.0496309945955463
1660	13 vs. 45	1	0.7877	0.7867	0.2174	0.8387	0.3542	1	0.89884612244898	0.903832	0.13500693877551	0.853011102040816	0.389999673469388	1	0.102650607765256	0.100856964519843	0.0636681222951117	0.130103373143979	0.0423790449114384
1661	13 vs. 45	2	0.9857	0.9814	0.0823	0.8667	0.375	2	0.98733412244898	0.985032326530612	0.0720954285714286	0.92485012244898	0.374998775510204	2	0.0100464514953486	0.0123890461273489	0.0270997599415362	0.0467822755882719	0.0481111504828868
1662	13 vs. 45	3	0.928	0.9116	0.1182	0.8182	0.5417	3	0.755337551020408	0.757762775510204	0.185275510204082	0.653356163265306	0.506666612244898	3	0.215412445918853	0.212311770503312	0.0832591056930451	0.204524859292461	0.0496309945955463
1663	13 vs. 46	1	0.7243	0.7223	0.2285	0.8387	0.3542	1	0.89884612244898	0.903832	0.13500693877551	0.853011102040816	0.389999673469388	1	0.102650607765256	0.100856964519843	0.0636681222951117	0.130103373143979	0.0423790449114384
1664	13 vs. 46	2	0.9659	0.9554	0.1259	0.8571	0.4167	2	0.98733412244898	0.985032326530612	0.0720954285714286	0.92485012244898	0.374998775510204	2	0.0100464514953486	0.0123890461273489	0.0270997599415362	0.0467822755882719	0.0481111504828868
1665	13 vs. 46	3	0.1401	0.2099	0.3779	0.0952	0.5625	3	0.755337551020408	0.757762775510204	0.185275510204082	0.653356163265306	0.506666612244898	3	0.215412445918853	0.212311770503312	0.0832591056930451	0.204524859292461	0.0496309945955463
1666	13 vs. 47	1	0.8501	0.8499	0.1814	0.9091	0.3125	1	0.89884612244898	0.903832	0.13500693877551	0.853011102040816	0.389999673469388	1	0.102650607765256	0.100856964519843	0.0636681222951117	0.130103373143979	0.0423790449114384
1667	13 vs. 47	2	0.9893	0.9861	0.0711	0.8966	0.3958	2	0.98733412244898	0.985032326530612	0.0720954285714286	0.92485012244898	0.374998775510204	2	0.0100464514953486	0.0123890461273489	0.0270997599415362	0.0467822755882719	0.0481111504828868
1668	13 vs. 47	3	0.8938	0.8669	0.1397	0.8333	0.5	3	0.755337551020408	0.757762775510204	0.185275510204082	0.653356163265306	0.506666612244898	3	0.215412445918853	0.212311770503312	0.0832591056930451	0.204524859292461	0.0496309945955463
1669	13 vs. 48	1	0.9263	0.9256	0.1209	0.9375	0.3333	1	0.89884612244898	0.903832	0.13500693877551	0.853011102040816	0.389999673469388	1	0.102650607765256	0.100856964519843	0.0636681222951117	0.130103373143979	0.0423790449114384
1670	13 vs. 48	2	0.99	0.9875	0.0691	0.9231	0.4583	2	0.98733412244898	0.985032326530612	0.0720954285714286	0.92485012244898	0.374998775510204	2	0.0100464514953486	0.0123890461273489	0.0270997599415362	0.0467822755882719	0.0481111504828868
1671	13 vs. 48	3	0.6375	0.7101	0.2472	0.4211	0.6042	3	0.755337551020408	0.757762775510204	0.185275510204082	0.653356163265306	0.506666612244898	3	0.215412445918853	0.212311770503312	0.0832591056930451	0.204524859292461	0.0496309945955463
1672	13 vs. 49	1	0.761	0.7585	0.2331	0.8387	0.3542	1	0.89884612244898	0.903832	0.13500693877551	0.853011102040816	0.389999673469388	1	0.102650607765256	0.100856964519843	0.0636681222951117	0.130103373143979	0.0423790449114384
1673	13 vs. 49	2	0.9816	0.9759	0.0936	0.8966	0.3958	2	0.98733412244898	0.985032326530612	0.0720954285714286	0.92485012244898	0.374998775510204	2	0.0100464514953486	0.0123890461273489	0.0270997599415362	0.0467822755882719	0.0481111504828868
1674	13 vs. 49	3	0.9087	0.8833	0.1316	0.8696	0.5208	3	0.755337551020408	0.757762775510204	0.185275510204082	0.653356163265306	0.506666612244898	3	0.215412445918853	0.212311770503312	0.0832591056930451	0.204524859292461	0.0496309945955463
1675	13 vs. 50	1	0.8464	0.8606	0.1772	0.9032	0.3542	1	0.89884612244898	0.903832	0.13500693877551	0.853011102040816	0.389999673469388	1	0.102650607765256	0.100856964519843	0.0636681222951117	0.130103373143979	0.0423790449114384
1676	13 vs. 50	2	0.9759	0.9721	0.1062	0.9231	0.4583	2	0.98733412244898	0.985032326530612	0.0720954285714286	0.92485012244898	0.374998775510204	2	0.0100464514953486	0.0123890461273489	0.0270997599415362	0.0467822755882719	0.0481111504828868
1677	13 vs. 50	3	0.6912	0.6801	0.2341	0.4444	0.4375	3	0.755337551020408	0.757762775510204	0.185275510204082	0.653356163265306	0.506666612244898	3	0.215412445918853	0.212311770503312	0.0832591056930451	0.204524859292461	0.0496309945955463
1678	14 vs. 15	1	0.9821	0.9818	0.0638	0.9333	0.375	1	0.89884612244898	0.903832	0.13500693877551	0.853011102040816	0.389999673469388	1	0.102650607765256	0.100856964519843	0.0636681222951117	0.130103373143979	0.0423790449114384
1679	14 vs. 15	2	0.9976	0.9967	0.034	0.9333	0.375	2	0.98733412244898	0.985032326530612	0.0720954285714286	0.92485012244898	0.374998775510204	2	0.0100464514953486	0.0123890461273489	0.0270997599415362	0.0467822755882719	0.0481111504828868
1680	14 vs. 15	3	0.9625	0.955	0.0794	0.8	0.4792	3	0.755337551020408	0.757762775510204	0.185275510204082	0.653356163265306	0.506666612244898	3	0.215412445918853	0.212311770503312	0.0832591056930451	0.204524859292461	0.0496309945955463
1681	14 vs. 16	1	0.9057	0.9233	0.1459	0.7407	0.4375	1	0.89884612244898	0.903832	0.13500693877551	0.853011102040816	0.389999673469388	1	0.102650607765256	0.100856964519843	0.0636681222951117	0.130103373143979	0.0423790449114384
1682	14 vs. 16	2	0.993	0.9945	0.0572	0.8966	0.3958	2	0.98733412244898	0.985032326530612	0.0720954285714286	0.92485012244898	0.374998775510204	2	0.0100464514953486	0.0123890461273489	0.0270997599415362	0.0467822755882719	0.0481111504828868
1683	14 vs. 16	3	0.6343	0.7261	0.2431	0.6154	0.4583	3	0.755337551020408	0.757762775510204	0.185275510204082	0.653356163265306	0.506666612244898	3	0.215412445918853	0.212311770503312	0.0832591056930451	0.204524859292461	0.0496309945955463
1684	14 vs. 17	1	0.9909	0.9911	0.0456	0.9655	0.3958	1	0.89884612244898	0.903832	0.13500693877551	0.853011102040816	0.389999673469388	1	0.102650607765256	0.100856964519843	0.0636681222951117	0.130103373143979	0.0423790449114384
1685	14 vs. 17	2	0.9936	0.9913	0.0547	0.9333	0.375	2	0.98733412244898	0.985032326530612	0.0720954285714286	0.92485012244898	0.374998775510204	2	0.0100464514953486	0.0123890461273489	0.0270997599415362	0.0467822755882719	0.0481111504828868
1686	14 vs. 17	3	0.7363	0.6808	0.2212	0.5217	0.5208	3	0.755337551020408	0.757762775510204	0.185275510204082	0.653356163265306	0.506666612244898	3	0.215412445918853	0.212311770503312	0.0832591056930451	0.204524859292461	0.0496309945955463
1687	14 vs. 18	1	0.9587	0.9675	0.0976	0.8667	0.375	1	0.89884612244898	0.903832	0.13500693877551	0.853011102040816	0.389999673469388	1	0.102650607765256	0.100856964519843	0.0636681222951117	0.130103373143979	0.0423790449114384
1688	14 vs. 18	2	0.9959	0.9956	0.044	1	0.375	2	0.98733412244898	0.985032326530612	0.0720954285714286	0.92485012244898	0.374998775510204	2	0.0100464514953486	0.0123890461273489	0.0270997599415362	0.0467822755882719	0.0481111504828868
1689	14 vs. 18	3	0.796	0.8101	0.1796	0.64	0.4792	3	0.755337551020408	0.757762775510204	0.185275510204082	0.653356163265306	0.506666612244898	3	0.215412445918853	0.212311770503312	0.0832591056930451	0.204524859292461	0.0496309945955463
1690	14 vs. 19	1	0.9752	0.9762	0.0749	0.8667	0.375	1	0.89884612244898	0.903832	0.13500693877551	0.853011102040816	0.389999673469388	1	0.102650607765256	0.100856964519843	0.0636681222951117	0.130103373143979	0.0423790449114384
1691	14 vs. 19	2	0.9971	0.996	0.0371	1	0.375	2	0.98733412244898	0.985032326530612	0.0720954285714286	0.92485012244898	0.374998775510204	2	0.0100464514953486	0.0123890461273489	0.0270997599415362	0.0467822755882719	0.0481111504828868
1692	14 vs. 19	3	0.8978	0.8829	0.1273	0.6923	0.4583	3	0.755337551020408	0.757762775510204	0.185275510204082	0.653356163265306	0.506666612244898	3	0.215412445918853	0.212311770503312	0.0832591056930451	0.204524859292461	0.0496309945955463
1693	14 vs. 20	1	0.9634	0.9706	0.0908	0.8462	0.4583	1	0.89884612244898	0.903832	0.13500693877551	0.853011102040816	0.389999673469388	1	0.102650607765256	0.100856964519843	0.0636681222951117	0.130103373143979	0.0423790449114384
1694	14 vs. 20	2	0.9894	0.987	0.0705	0.9286	0.4167	2	0.98733412244898	0.985032326530612	0.0720954285714286	0.92485012244898	0.374998775510204	2	0.0100464514953486	0.0123890461273489	0.0270997599415362	0.0467822755882719	0.0481111504828868
1695	14 vs. 20	3	0.8062	0.7909	0.1812	0.5455	0.5417	3	0.755337551020408	0.757762775510204	0.185275510204082	0.653356163265306	0.506666612244898	3	0.215412445918853	0.212311770503312	0.0832591056930451	0.204524859292461	0.0496309945955463
1696	14 vs. 21	1	0.9763	0.9803	0.0736	0.9655	0.3958	1	0.89884612244898	0.903832	0.13500693877551	0.853011102040816	0.389999673469388	1	0.102650607765256	0.100856964519843	0.0636681222951117	0.130103373143979	0.0423790449114384
1697	14 vs. 21	2	0.9822	0.9839	0.0922	0.8824	0.2917	2	0.98733412244898	0.985032326530612	0.0720954285714286	0.92485012244898	0.374998775510204	2	0.0100464514953486	0.0123890461273489	0.0270997599415362	0.0467822755882719	0.0481111504828868
1698	14 vs. 21	3	0.6602	0.7354	0.2259	0.5833	0.5	3	0.755337551020408	0.757762775510204	0.185275510204082	0.653356163265306	0.506666612244898	3	0.215412445918853	0.212311770503312	0.0832591056930451	0.204524859292461	0.0496309945955463
1699	14 vs. 22	1	0.9812	0.9858	0.0654	0.9286	0.4167	1	0.89884612244898	0.903832	0.13500693877551	0.853011102040816	0.389999673469388	1	0.102650607765256	0.100856964519843	0.0636681222951117	0.130103373143979	0.0423790449114384
1700	14 vs. 22	2	0.9952	0.9937	0.0476	0.9677	0.3542	2	0.98733412244898	0.985032326530612	0.0720954285714286	0.92485012244898	0.374998775510204	2	0.0100464514953486	0.0123890461273489	0.0270997599415362	0.0467822755882719	0.0481111504828868
1701	14 vs. 22	3	0.7831	0.7808	0.1883	0.6087	0.5208	3	0.755337551020408	0.757762775510204	0.185275510204082	0.653356163265306	0.506666612244898	3	0.215412445918853	0.212311770503312	0.0832591056930451	0.204524859292461	0.0496309945955463
1702	14 vs. 23	1	0.9581	0.959	0.0971	0.9032	0.3542	1	0.89884612244898	0.903832	0.13500693877551	0.853011102040816	0.389999673469388	1	0.102650607765256	0.100856964519843	0.0636681222951117	0.130103373143979	0.0423790449114384
[truncated: 1,973 more rows]
