# Supplementary material for: Reproducible analysis of disease space via principal components using the novel R package syndRomics
Source: eLife. 2021 Jan 14;10:e61812. doi: 10.7554/eLife.61812 (PMC7857733; doi:10.7554/eLife.61812)
Supplement: Figure 7—source data 1. [file elife-61812-fig7-data1.csv]

	Variables	component	original	mean	ci_low	ci_high	pvalue	adj.p.value
1	CT_brain_pathology	PC1	0.305721369738479	0.00456021047945696	-0.224582267330492	0.238828253215286	0.0139720558882236	0.0419161676646707
2	CT_brain_pathology	PC2	0.728936369319468	0.0043365442823467	-0.155542157127176	0.1755779831705	0.00199600798403194	0.0031936127744511
3	CT_brain_pathology	PC3	0.12881131546045	-0.00127764035621731	-0.302419875520111	0.284420224347013	0.445109780439122	0.562243933186259
4	CT_cisterncomp	PC1	0.0449419614121051	0.00370898386637347	-0.245702899349171	0.261926789120499	0.720558882235529	0.720558882235529
5	CT_cisterncomp	PC2	0.752168184566713	0.00598537355826176	-0.16248023379693	0.182442484704758	0.00199600798403194	0.0031936127744511
6	CT_cisterncomp	PC3	-0.231497522674499	0.00700659267017949	-0.305646028598501	0.304418414639797	0.159680638722555	0.348394120849211
7	CT_contusion	PC1	0.286457013343524	-0.00563194100677251	-0.255964446493998	0.227335578715807	0.0239520958083832	0.0574850299401198
8	CT_contusion	PC2	0.644459705346971	0.010114218704503	-0.145092926824132	0.173360905303254	0.00199600798403194	0.0031936127744511
9	CT_contusion	PC3	0.0536794021283979	-0.0082227557082347	-0.321816548891409	0.292686713078628	0.766467065868264	0.799791720906014
10	CT_EDH	PC1	0.250429199301175	0.00368984414808588	-0.251417810034987	0.243380897195619	0.0499001996007984	0.0855431993156544
11	CT_EDH	PC2	0.253753983612066	0.00170041909193352	-0.143348420502983	0.136226256757224	0.00199600798403194	0.0031936127744511
12	CT_EDH	PC3	0.0785891171897571	0.00791297761318932	-0.24735467330083	0.29617454808664	0.596806387225549	0.682064442543484
13	CT_facial_FX	PC1	0.288342070520208	-0.00896416677116801	-0.25664226109253	0.254322437792364	0.029940119760479	0.0589590050667895
14	CT_facial_FX	PC2	0.147076946686409	0.00504971341295789	-0.139023139765795	0.153688085584141	0.0558882235528942	0.0705956508036558
15	CT_facial_FX	PC3	0.297824563371293	-0.00891290839300894	-0.341053961096247	0.339899539168158	0.0818363273453094	0.251497005988024
16	CT_Marshall	PC1	0.0790427791635746	-0.00667951601066876	-0.247668223729557	0.231090191909334	0.550898203592814	0.600979858464888
17	CT_Marshall	PC2	0.849258641719804	0.00755477803481929	-0.159692937986562	0.176893027850167	0.00199600798403194	0.0031936127744511
18	CT_Marshall	PC3	-0.176271451932422	-0.00835653447354222	-0.30301829733739	0.293272551399954	0.273453093812375	0.422155688622754
19	CT_midlineshift	PC1	-0.123719840681807	-0.00959333084868459	-0.304661818254312	0.2876183974312	0.42315369261477	0.507784431137725
20	CT_midlineshift	PC2	0.699117193880789	0.00670795177830168	-0.163147940464373	0.201107109554279	0.00199600798403194	0.0031936127744511
21	CT_midlineshift	PC3	-0.21517268423045	0.00405253600553182	-0.302063799976202	0.304513432175688	0.191616766467066	0.383233532934132
22	CT_Rotterdam	PC1	0.121651641387618	0.0157047590613993	-0.231464393043751	0.276977927902711	0.365269461077844	0.461393003466751
23	CT_Rotterdam	PC2	0.812237414429178	0.00213749613210299	-0.14855880180477	0.162106792992128	0.00199600798403194	0.0031936127744511
24	CT_Rotterdam	PC3	-0.168923023400624	0.0221448456545001	-0.294504896298451	0.310732314927492	0.31936127744511	0.450862979922508
25	CT_SAH	PC1	0.253900947741038	0.00202485993091826	-0.231248073108747	0.24454332314092	0.031936127744511	0.0589590050667895
26	CT_SAH	PC2	0.738041578939745	0.013739755456574	-0.139435901592141	0.171818899957938	0.00199600798403194	0.0031936127744511
27	CT_SAH	PC3	0.203101579391264	0.0118144976006089	-0.310303888897211	0.329432722144719	0.249500998003992	0.422155688622754
28	CT_SDH	PC1	0.253834915614422	-0.00296123355160431	-0.225443166872747	0.237631379875618	0.031936127744511	0.0589590050667895
29	CT_SDH	PC2	0.747296881496634	0.00715751147510461	-0.148587293919724	0.15449737098967	0.00199600798403194	0.0031936127744511
30	CT_SDH	PC3	0.197724713944536	-0.00447718038042079	-0.325597334332459	0.321483321844039	0.25748502994012	0.422155688622754
31	CT_skull_FX	PC1	0.374406761045835	0.00592622006075848	-0.217965120745095	0.263979609854987	0.00399201596806387	0.0191616766467066
32	CT_skull_FX	PC2	0.514515711584183	-0.00144050237087733	-0.150480316782331	0.134606631102735	0.00199600798403194	0.0031936127744511
33	CT_skull_FX	PC3	0.271073283352305	-0.00634546876279186	-0.309350307859945	0.308535398994425	0.0998003992015968	0.266134397870925
34	CT_skullbase_FX	PC1	0.321273973853786	0.00397181977105547	-0.263441538737073	0.245803798141873	0.0119760479041916	0.0410607356715141
35	CT_skullbase_FX	PC2	0.303875682867203	-0.000388673092350345	-0.136232906224296	0.156324900265375	0.00199600798403194	0.0031936127744511
36	CT_skullbase_FX	PC3	0.370869635951801	0.00487450289328343	-0.318553042836075	0.361481661395725	0.0339321357285429	0.162874251497006
37	CVLT_long_6mo	PC1	-0.613733400922377	-0.00263138376459145	-0.226859001737606	0.245966630220937	0.00199600798403194	0.0119760479041916
38	CVLT_long_6mo	PC2	-0.0904897833902699	-0.00382230948479999	-0.150487428881167	0.145632217148834	0.251497005988024	0.301796407185629
39	CVLT_long_6mo	PC3	0.0838777699834045	-0.00414453971152566	-0.287090813649284	0.296833101259167	0.564870259481038	0.677844311377246
40	CVLT_short_6mo	PC1	-0.542846172819425	-0.0150107865238601	-0.290767298477882	0.257433995002157	0.00199600798403194	0.0119760479041916
41	CVLT_short_6mo	PC2	-0.0263311194100883	0.0074876072847464	-0.149953284912402	0.157187316532456	0.730538922155689	0.730538922155689
42	CVLT_short_6mo	PC3	0.00357140548894022	-0.00362154750602865	-0.327722060073226	0.308226604496719	0.978043912175649	0.978043912175649
43	GOSE_3mo	PC1	-0.173131838141738	0.0013799242119138	-0.233268064145731	0.230243431004008	0.179640718562874	0.253610426206411
44	GOSE_3mo	PC2	-0.526616676406043	-0.00154820842861406	-0.144626656642102	0.149198895855814	0.00199600798403194	0.0031936127744511
45	GOSE_3mo	PC3	0.535645559361842	0.00454876401732409	-0.374472738730833	0.421442793038021	0.00399201596806387	0.031936127744511
46	GOSE_6mo	PC1	-0.111747112861821	0.00160028331856358	-0.242013754831103	0.26381383505216	0.365269461077844	0.461393003466751
47	GOSE_6mo	PC2	-0.498239381909474	-0.00398950509547301	-0.139945523134601	0.136943248790333	0.00199600798403194	0.0031936127744511
48	GOSE_6mo	PC3	0.524459632479987	0.00488391665499916	-0.361103478001632	0.341304875596408	0.00199600798403194	0.0239520958083832
49	PTSD_diagnosis_6mo	PC1	0.176192409373211	0.00140621952739161	-0.2497505699625	0.25569605409033	0.159680638722555	0.239520958083832
50	PTSD_diagnosis_6mo	PC2	0.0495002866213445	-0.000940956924813374	-0.137401664306518	0.158648900707732	0.546906187624751	0.625035642999715
51	PTSD_diagnosis_6mo	PC3	-0.324430333466596	-0.010480479109019	-0.329216410678568	0.272040572843663	0.0419161676646707	0.167664670658683
52	SNP_ANKK1_Glu713Lys	PC1	0.367546523689671	0.00214520025413678	-0.247011668226089	0.260318647886794	0.00598802395209581	0.0239520958083832
53	SNP_ANKK1_Glu713Lys	PC2	-0.175890168094286	-0.00192141291935932	-0.142859713108926	0.155209122225304	0.0159680638722555	0.0225431489961254
54	SNP_ANKK1_Glu713Lys	PC3	-0.568494030040757	-0.00866739261105763	-0.382068120300619	0.330944142391272	0.00199600798403194	0.0239520958083832
55	SNP_ANKK1_Gly318Arg	PC1	0.661250942244532	0.00673246635225768	-0.27952865050393	0.287707226123066	0.00199600798403194	0.0119760479041916
56	SNP_ANKK1_Gly318Arg	PC2	-0.221766151725113	-0.00354665572834187	-0.161059956968121	0.150583862287567	0.00598802395209581	0.00898203592814371
57	SNP_ANKK1_Gly318Arg	PC3	-0.227835401039905	-0.00417987055909331	-0.289091190281767	0.292728137445001	0.151696606786427	0.348394120849211
58	SNP_ANKK1_Gly442Arg	PC1	-0.296763212251202	0.00865421675812532	-0.252655917683545	0.262132894715874	0.0199600798403194	0.053226879574185
59	SNP_ANKK1_Gly442Arg	PC2	0.0335779378448263	-0.00360117313594181	-0.148032118640353	0.13389435366673	0.640718562874252	0.691486592033325
60	SNP_ANKK1_Gly442Arg	PC3	-0.305996808201444	0.00937580941008332	-0.344694294218652	0.342596786594455	0.0838323353293413	0.251497005988024
61	SNP_COMT	PC1	0.0852717762090179	0.00390059001624382	-0.243323025367682	0.243177358728116	0.518962075848303	0.593099515255204
62	SNP_COMT	PC2	-0.0352874724644474	-0.00216762939696937	-0.159425790015323	0.141527081375604	0.662674650698603	0.691486592033325
63	SNP_COMT	PC3	-0.0761852438015984	-0.0001396273764647	-0.290968773259338	0.280481994928799	0.656686626746507	0.716385410996189
64	SNP_DRD2	PC1	-0.677141760025651	-0.00181228284049823	-0.280323773378806	0.274769778006603	0.00199600798403194	0.0119760479041916
65	SNP_DRD2	PC2	0.231796328243315	0.00198930287043559	-0.140640049282545	0.145581402393714	0.00199600798403194	0.0031936127744511
66	SNP_DRD2	PC3	0.185209068811727	0.0085217365377719	-0.301266072614758	0.312980291987459	0.281437125748503	0.422155688622754
67	SNP_PARP1	PC1	-0.0505574408723352	-0.000309652343580455	-0.240214493939482	0.240130373349944	0.698602794411178	0.720558882235529
68	SNP_PARP1	PC2	0.155784583507668	0.000245546263635418	-0.136662586303532	0.144332888251685	0.0279441117764471	0.0372588157019295
69	SNP_PARP1	PC3	0.159530455815165	0.00182248149953676	-0.322880865416244	0.342265697567813	0.359281437125749	0.479041916167665
70	WAIS_PSI_6mo	PC1	-0.240710527998599	-0.00175611523804778	-0.235810097999793	0.246842044905633	0.0538922155688623	0.0862275449101796
71	WAIS_PSI_6mo	PC2	-0.258254681847606	0.00236208169368247	-0.140922627257265	0.144042729685601	0.00199600798403194	0.0031936127744511
72	WAIS_PSI_6mo	PC3	0.414798332874778	0.0110163345002651	-0.332705609565062	0.330710605551562	0.00598802395209581	0.0359281437125749
